# Supplementary material for: Sm-Like Protein-Mediated RNA Metabolism Is Required for Heat Stress Tolerance in Arabidopsis
Source: Front Plant Sci. 2016 Jul 21;7:1079. doi: 10.3389/fpls.2016.01079 (PMC4954817; doi:10.3389/fpls.2016.01079)
Supplement: Supplementary file 4 [file Table_3.XLS]

## Sheet: Non_AGI_TUs
Supplementary Table S3. Non-Arabidopsis Genome Initiative (AGI) transcriptional units (TUs) expression data collected in this study.									Wild_type_0hr		Wild_type_2hr_heat_stress		Wild_type_6hr_heat_stress		SAD1_0hr		Wild_type_0hr/SAD1_0hr			SAD1_2hr_heat_stress		Wild_type_2hr/SAD1_2hr_heat_stress			SAD1_6hr_heat_stress		Wild_type_6hr/SAD1_6hr			Wild_type_2hr/Wild_type_0hr			Wild_type_6hr/Wild_type_0hr			SAD1_2hr/SAD1_0hr			SAD1_6hr/SAD1_0hr
Group ID a	Chr	Strand b	Group Start c	Group End c	TAIR10 80% d	TAIR10 50% e	Antisense AGI f	Antisense non-AGI TU g	Intensity h	P-initial i	Intensity h	P-initial i	Intensity h	P-initial i	Intensity h	P-initial i	Ratio j	P-value k	FDR k	Intensity h	P-initial i	Ratio j	P-value k	FDR k	Intensity h	P-initial i	Ratio j	P-value k	FDR k	Ratio j	P-value k	FDR k	Ratio j	P-value k	FDR k	Ratio j	P-value k	FDR k	Ratio j	P-value k	FDR k
TU0001	1	+	33979	36029			AT1G01060.1		408.721	3.13e-14	444.595	1.52e-13	322.365	3.14e-06	327.915	2.83e-10	1.24642	0.0769	NOT	372.082	1.32e-07	1.19488	0.45	NOT	242.431	6.1e-09	1.32972	0.257	NOT	1.08777	0.446	NOT	0.788717	0.0921	NOT	1.13469	0.117	NOT	0.73931	0.3	NOT
TU0002	1	+	45041	49314			AT1G01090.1		605.015	1.88e-14	492.793	1.76e-13	452.778	7.13e-13	665.09	3.68e-20	0.909674	0.424	NOT	439.235	6.95e-08	1.12193	0.207	NOT	362.774	8.63e-15	1.2481	0.211	NOT	0.814514	0.0914	NOT	0.748375	0.00867	DIFF	0.660414	0.0259	DIFF	0.545451	0.0644	DIFF
TU0003	1	+	50120	50636			AT1G01100.1		2521.65	6.63e-14	2727.36	1.69e-12	1607.94	1.52e-10	2951.51	8.56e-14	0.854359	0.356	NOT	2462.48	1.14e-12	1.10757	0.471	NOT	2079.27	8.59e-10	0.773319	0.403	NOT	1.08158	0.416	NOT	0.637654	0.281	NOT	0.834312	0.429	NOT	0.704477	0.211	NOT
TU0004	1	+	63437	64139			AT1G01130.1		602.464	3.31e-10	515.053	7.32e-08	754.642	4.04e-07	483.175	1.09e-08	1.24689	0.136	NOT	440.462	2.75e-06	1.16935	0.106	NOT	643.837	2.47e-06	1.1721	0.329	NOT	0.854911	0.31	NOT	1.25259	0.308	NOT	0.911599	0.317	NOT	1.33251	0.455	NOT
TU0005	1	+	121525	123460			AT1G01320.1		523.058	7.56e-12	483.214	2.98e-12	321.731	2.55e-05	460.621	2.56e-10	1.13555	0.489	NOT	314.916	1.73e-05	1.53442	0.101	NOT	296.005	1.48e-09	1.08691	0.324	NOT	0.923825	0.216	NOT	0.615096	0.0273	DIFF	0.683677	0.0101	DIFF	0.642622	0.00455	DIFF
TU0006	1	-	130198	130569	AT1G01320	AT1G01320			8257.05	4.69e-17	10768.1	6.01e-20	8821.05	6.92e-22	8377.1	4.24e-22	0.985669	0.469	NOT	5351.75	1.14e-17	2.01207	0.0484	NOT	7724.97	4.69e-24	1.14189	0.378	NOT	1.30411	0.242	NOT	1.06831	0.281	NOT	0.638855	0.15	NOT	0.922153	0.459	NOT
TU0007	1	-	136663	139598			AT1G01350.1,AT1G01355.1		241.812	0.000109524	324.118	1.32e-06	314.931	5.73e-08	293.924	2.84e-06	0.822702	0.34	NOT	461.967	7.95e-09	0.701604	0.0632	NOT	326.954	8.62e-08	0.963227	0.0785	NOT	1.34037	0.223	NOT	1.30238	0.368	NOT	1.57172	0.0322	DIFF	1.11238	0.244	NOT
TU0008	1	+	160430	162222			AT1G01440.1		552.307	1.28e-20	514.76	6.44e-14	447.934	1.46e-11	478.407	2.35e-15	1.15447	0.326	NOT	487.906	2.37e-10	1.05504	0.418	NOT	554.914	2.19e-16	0.807213	0.01	NOT	0.932018	0.273	NOT	0.811024	0.0462	NOT	1.01986	0.31	NOT	1.15992	0.149	NOT
TU0009	1	+	172213	173048			AT1G01470.1		703.52	3.26e-10	1737.96	6.92e-17	510.256	0.0136703	1341.33	1.08e-14	0.524494	0.029	NOT	3303.46	1.04e-18	0.526103	0.00753	NOT	1458.01	8.57e-13	0.349967	8.12e-05	DIFF	2.47038	0.00587	DIFF	0.72529	0.0656	NOT	2.46282	0.00416	DIFF	1.08699	0.261	NOT
TU0010	1	+	180406	180833			AT1G01490.1		1788.42	1.61e-07	2012.84	2.12e-20	2032.08	1.09e-13	2397.6	1.1e-19	0.745921	0.108	NOT	2042.48	4.24e-11	0.985488	0.355	NOT	1495.41	1.52e-09	1.35888	0.265	NOT	1.12549	0.146	NOT	1.13624	0.188	NOT	0.851885	0.282	NOT	0.623711	0.151	NOT
TU0011	1	-	194726	196468			AT1G01540.1		1060.87	5.07e-17	857.568	2.37e-16	505.057	3.21e-11	996.586	5.94e-16	1.0645	0.181	NOT	752.473	1.54e-15	1.13967	0.254	NOT	688.608	1.61e-10	0.733446	0.366	NOT	0.808363	0.199	NOT	0.476078	0.00371	DIFF	0.755051	0.326	NOT	0.690967	0.12	NOT
TU0012	1	+	221548	227302			AT1G01620.1		613.958	3.19e-11	766.57	1.4e-17	458.518	3.9e-11	746.218	1.17e-18	0.82276	0.0618	NOT	720.92	5.08e-19	1.06332	0.312	NOT	531.497	7.11e-12	0.862692	0.259	NOT	1.24857	0.0649	NOT	0.746823	0.387	NOT	0.966098	0.346	NOT	0.712254	0.0961	NOT
TU0013	1	+	237750	239367			AT1G01650.1		1102.51	2.95e-10	658.625	1.13e-05	970.947	6.02e-11	2472.34	8.42e-30	0.445938	7.11e-05	DIFF	1303.46	2.14e-13	0.50529	0.0878	NOT	2063.5	8.04e-23	0.470534	0.00684	NOT	0.597387	0.113	NOT	0.88067	0.353	NOT	0.527217	0.00019	DIFF	0.834634	0.081	NOT
TU0014	1	+	240330	242081			AT1G01660.1		487.717	1.65e-10	294.075	7.24e-07	303.023	1.02e-05	500.562	8.16e-11	0.974339	0.399	NOT	388.201	2.34e-10	0.757533	0.27	NOT	449.165	7.94e-10	0.674636	0.137	NOT	0.602962	0.041	NOT	0.621309	0.118	NOT	0.77553	0.219	NOT	0.897321	0.438	NOT
TU0015	1	-	274310	274706		AT1G01740			968.726	2.5e-07	854.053	1.56e-11	784.405	1.75e-10	720.265	3.11e-11	1.34496	0.441	NOT	493.759	1.42e-07	1.7297	0.129	NOT	951.198	2.17e-14	0.82465	0.138	NOT	0.881625	0.472	NOT	0.809728	0.323	NOT	0.685524	0.0965	NOT	1.32062	0.265	NOT
TU0016	1	-	310601	313003			AT1G01900.1		253.197	5.41e-05	266.776	3.83e-06	282.852	1.04e-07	212.623	0.00134444	1.19083	0.435	NOT	527.657	8.2e-12	0.505586	0.0169	NOT	282.328	2.2e-10	1.00186	0.476	NOT	1.05363	0.104	NOT	1.11712	0.187	NOT	2.48166	0.000424	DIFF	1.32783	0.17	NOT
TU0017	1	+	334404	337865			AT1G01960.1		484.538	1.15e-19	445.302	3.78e-21	591.594	2.87e-21	416.236	4.28e-09	1.16409	0.328	NOT	400.383	1.85e-07	1.11219	0.454	NOT	504.613	1.07e-13	1.17237	0.466	NOT	0.919024	0.205	NOT	1.22094	0.328	NOT	0.961913	0.239	NOT	1.21232	0.153	NOT
TU0018	1	+	343374	344419			AT1G01990.1		195.328	0.0110157	250.958	4.27e-07	319.861	3.77e-06	239.557	2.89e-05	0.815372	0.0888	NOT	253.122	8.72e-06	0.991451	0.255	NOT	356.008	2.84e-10	0.898466	0.0528	NOT	1.2848	0.125	NOT	1.63756	0.162	NOT	1.05663	0.18	NOT	1.48611	0.0925	NOT
TU0019	1	-	345769	347438			AT1G02000.1		438.186	5.32e-09	371.973	4.86e-09	446.894	2.01e-13	305.402	2.65e-09	1.43478	0.343	NOT	507.035	3.6e-13	0.733624	0.393	NOT	442.805	9.42e-10	1.00923	0.16	NOT	0.848893	0.487	NOT	1.01987	0.263	NOT	1.66022	0.256	NOT	1.44991	0.486	NOT
TU0020	1	-	389771	390354			AT1G02100.1		476.36	3.05e-07	748.944	1.78e-13	372.542	2.27e-07	448.969	4.22e-07	1.06101	0.449	NOT	572.455	4.17e-07	1.3083	0.0557	NOT	486.284	8.88e-07	0.7661	0.105	NOT	1.57222	0.0651	NOT	0.78206	0.207	NOT	1.27504	0.488	NOT	1.08311	0.341	NOT
TU0021	1	-	392752	397159			AT1G02100.1,AT1G02110.1,AT1G02120.1		368.52	9.8e-16	369.254	1.3e-09	324.152	1.27e-15	303.585	3.09e-11	1.21389	0.122	NOT	314.603	8.75e-12	1.17371	0.226	NOT	336.332	1.45e-11	0.963786	0.398	NOT	1.00199	0.307	NOT	0.879605	0.165	NOT	1.03629	0.442	NOT	1.10787	0.338	NOT
TU0022	1	-	399064	399711			AT1G02120.1		1292.68	3.95e-10	890.648	5.88e-11	934.516	2.89e-09	1157.52	2.89e-10	1.11677	0.372	NOT	762.525	1.25e-07	1.16802	0.467	NOT	805.937	3.94e-08	1.15954	0.324	NOT	0.688993	0.172	NOT	0.722929	0.301	NOT	0.658758	0.297	NOT	0.696262	0.318	NOT
TU0023	1	+	402062	404480			AT1G02140.1		2058.65	3.5e-07	1833.21	2.95e-10	2194.51	8.13e-09	1869.64	5.24e-07	1.10109	0.452	NOT	2944.43	1.31e-10	0.622603	0.428	NOT	3717	8.78e-11	0.590398	0.31	NOT	0.890491	0.231	NOT	1.06599	0.476	NOT	1.57486	0.186	NOT	1.98808	0.394	NOT
TU0024	1	+	462145	462828			AT1G02330.1		472.281	8.89e-06	708.629	1.49e-08	464.395	7.61e-05	688.133	1.15e-05	0.686322	0.367	NOT	776.367	1.22e-09	0.91275	0.442	NOT	480.812	1.76e-06	0.965856	0.389	NOT	1.50044	0.31	NOT	0.983302	0.406	NOT	1.12822	0.375	NOT	0.69872	0.205	NOT
TU0025	1	-	471195	471477					6773.95	9.8e-19	5633.73	1.58e-17	6123.6	3.6e-16	4819.31	2.25e-15	1.40559	0.0562	NOT	2256.99	2.15e-14	2.49613	0.000142	DIFF	2891.97	1.66e-14	2.11745	0.00368	NOT	0.831676	0.108	NOT	0.903993	0.104	NOT	0.468322	0.000167	DIFF	0.60008	0.00305	DIFF
TU0026	1	-	519039	520376			AT1G02500.1		1734.15	6.08e-22	1027.5	2.99e-20	799.578	5.32e-20	2037.65	3.67e-26	0.851054	0.131	NOT	969.452	6.34e-19	1.05988	0.41	NOT	746.617	3.6e-14	1.07093	0.39	NOT	0.592509	0.0128	DIFF	0.461078	0.000558	DIFF	0.47577	9.43e-05	DIFF	0.366411	5.79e-06	DIFF
TU0027	1	-	539387	540070			AT1G02560.1		428.915	0.000128173	624.56	3.71e-15	462.223	3.3e-06	444.532	4.31e-06	0.964869	0.226	NOT	444.523	2.62e-05	1.40501	0.0373	NOT	457.716	8.44e-06	1.00985	0.35	NOT	1.45614	0.0534	NOT	1.07766	0.283	NOT	0.99998	0.245	NOT	1.02966	0.256	NOT
TU0028	1	-	581665	582879			AT1G02680.1		482.193	2.26e-15	429.24	2.18e-09	667.441	1.12e-09	415.834	5.93e-06	1.15958	0.373	NOT	493.548	1.58e-08	0.869703	0.391	NOT	466.898	2.08e-07	1.42952	0.122	NOT	0.890183	0.223	NOT	1.38418	0.332	NOT	1.18689	0.315	NOT	1.1228	0.299	NOT
TU0029	1	+	589580	590210			AT1G02710.1		2207.99	7.54e-21	2541.4	1.74e-24	2575.66	5.32e-23	2174.82	3.12e-15	1.01525	0.32	NOT	1492.94	1.24e-19	1.70228	0.0826	NOT	2144.93	2.5e-20	1.20081	0.299	NOT	1.151	0.469	NOT	1.16652	0.379	NOT	0.686466	0.22	NOT	0.986256	0.396	NOT
TU0030	1	+	608240	608942			AT1G02780.1		3241.79	1.11e-12	2802.79	1.27e-16	2368.26	4.41e-14	3207.84	3.59e-17	1.01058	0.258	NOT	2692.34	7.06e-20	1.04102	0.396	NOT	1918.09	2.02e-13	1.2347	0.423	NOT	0.864581	0.386	NOT	0.730541	0.345	NOT	0.8393	0.262	NOT	0.597938	0.0793	NOT
TU0031	1	+	753537	754536			AT1G03130.1		2462.66	1.01e-17	2640.06	6.53e-17	2018.52	6.29e-18	2611.73	6.65e-20	0.942923	0.444	NOT	2334.04	1.39e-14	1.13111	0.344	NOT	1741.01	6.62e-16	1.1594	0.447	NOT	1.07204	0.235	NOT	0.81965	0.197	NOT	0.893676	0.109	NOT	0.666612	0.141	NOT
TU0032	1	-	756393	756797			AT1G03150.1		696.98	6.17e-20	1052.27	2.49e-21	298.513	7.49e-11	572.287	8.71e-15	1.21789	0.357	NOT	665.532	6.32e-19	1.5811	0.166	NOT	574.079	8.31e-18	0.519986	0.111	NOT	1.50976	0.247	NOT	0.428295	0.19	NOT	1.16293	0.492	NOT	1.00313	0.246	NOT
TU0033	1	+	767033	767661					362.519	0.00897409	408.177	1.39e-07	449.061	3.86e-06	341.242	3.59e-06	1.06235	0.489	NOT	263.007	0.0055715	1.55196	0.0224	NOT	502.975	7.47e-14	0.89281	0.254	NOT	1.12595	0.054	NOT	1.23872	0.22	NOT	0.770735	0.322	NOT	1.47395	0.0495	DIFF
TU0034	1	-	814183	816635			AT1G03310.1		406.421	4.28e-10	357.374	2.63e-09	351.723	5.16e-08	300.885	3.83e-06	1.35075	0.114	NOT	311.511	1.55e-06	1.14723	0.325	NOT	359.266	3.45e-08	0.979004	0.196	NOT	0.87932	0.153	NOT	0.865415	0.132	NOT	1.03532	0.363	NOT	1.19403	0.167	NOT
TU0035	1	+	822864	824238			AT1G03350.1		403.31	2.69e-09	443.608	6.65e-13	415	2.14e-06	476.865	3.99e-12	0.845753	0.228	NOT	545.455	3.51e-14	0.813281	0.178	NOT	449.952	2.64e-08	0.922321	0.467	NOT	1.09992	0.413	NOT	1.02899	0.345	NOT	1.14384	0.305	NOT	0.943563	0.41	NOT
TU0036	1	-	834605	835336			AT1G03370.1		577.113	1.16e-11	359.537	2.44e-09	324.628	0.000201301	377.871	9.55e-06	1.52728	0.057	NOT	319.265	8.75e-12	1.12614	0.197	NOT	260.2	0.0298006	1.24761	0.267	NOT	0.622992	0.0904	NOT	0.562503	0.00957	DIFF	0.844905	0.235	NOT	0.688595	0.0773	NOT
TU0037	1	-	851650	853871			AT1G03440.1		450.627	9.91e-07	512.543	3.63e-09	401.782	4.2e-11	404.475	3e-09	1.1141	0.264	NOT	493.921	1.23e-15	1.0377	0.499	NOT	385.583	9.16e-14	1.04201	0.477	NOT	1.1374	0.366	NOT	0.891607	0.254	NOT	1.22114	0.167	NOT	0.953293	0.424	NOT
TU0038	1	+	868808	869912			AT1G03475.1		1250.01	3.4e-16	792.931	1.03e-14	867.88	3.38e-11	1131.28	2.67e-16	1.10495	0.395	NOT	687.197	2.04e-08	1.15386	0.406	NOT	642.001	7.44e-12	1.35184	0.325	NOT	0.63434	0.0722	NOT	0.694298	0.135	NOT	0.607451	0.0714	NOT	0.5675	0.114	NOT
TU0039	1	-	871694	875354			AT1G03495.1		393.49	8.72e-06	915.226	3.45e-10	2508.85	3.31e-17	412.767	2.3e-05	0.953298	0.358	NOT	845.453	2.76e-12	1.08253	0.21	NOT	3694.94	6.15e-21	0.678996	0.0432	NOT	2.32592	0.0128	DIFF	6.37589	1.79e-05	DIFF	2.04826	0.11	NOT	8.95164	1.69e-09	DIFF
TU0040	1	-	898627	899600			AT1G03600.1		1143.12	3.2e-23	1732.62	2.14e-21	1296.37	7.24e-19	1497.45	4.63e-18	0.763378	0.174	NOT	1064.78	8.69e-15	1.62721	0.051	NOT	1304.36	3.71e-19	0.993874	0.474	NOT	1.51569	0.108	NOT	1.13406	0.417	NOT	0.711062	0.0638	NOT	0.871054	0.112	NOT
TU0041	1	-	901135	902717			AT1G03610.1		276.83	6.65e-10	210.767	0.00144851	258.157	0.00155603	309.615	3.05e-09	0.89411	0.194	NOT	273.05	8.85e-05	0.771899	0.338	NOT	190.204	0.000112804	1.35726	0.109	NOT	0.761359	0.048	NOT	0.932547	0.333	NOT	0.881902	0.0329	DIFF	0.614324	0.00556	DIFF
TU0042	1	-	907529	909232			AT1G03630.1		300.674	3.63e-11	411.85	3.2e-12	389.287	1.34e-09	425.948	7.39e-10	0.705894	0.0778	NOT	367.515	1.71e-11	1.12063	0.471	NOT	314.915	1.76e-05	1.23617	0.281	NOT	1.36976	0.216	NOT	1.29471	0.246	NOT	0.862817	0.205	NOT	0.739327	0.0772	NOT
TU0043	1	+	931041	931837			AT1G03730.1		765.094	9.8e-15	753.904	1e-14	766.331	1.32e-17	622.838	3.36e-12	1.2284	0.288	NOT	741.068	6.73e-12	1.01732	0.463	NOT	903.914	1.04e-13	0.847792	0.459	NOT	0.985374	0.473	NOT	1.00162	0.462	NOT	1.18982	0.299	NOT	1.45128	0.228	NOT
TU0044	1	-	935622	936908			AT1G03740.1		478.98	5.32e-09	372.394	1.05e-07	249.886	0.000140945	382.905	6.1e-08	1.25091	0.395	NOT	465.175	1.17e-14	0.800546	0.178	NOT	392.288	6.17e-09	0.636996	0.0276	NOT	0.777473	0.275	NOT	0.521704	0.0152	DIFF	1.21486	0.301	NOT	1.0245	0.457	NOT
TU0045	1	+	957231	958276			AT1G03800.1		366.795	3.31e-10	422.696	1.7e-08	544.074	5.33e-09	688.754	4.82e-14	0.532549	0.1	NOT	649.236	4.91e-11	0.651067	0.0346	NOT	450.955	1.55e-09	1.20649	0.486	NOT	1.1524	0.258	NOT	1.48332	0.441	NOT	0.942624	0.491	NOT	0.65474	0.124	NOT
TU0046	1	+	979371	980488			AT1G03860.1		291.212	0.000195253	339.715	3.75e-08	366.285	2.25e-06	329.442	4.37e-09	0.883955	0.329	NOT	345.206	6.66e-06	0.984094	0.467	NOT	475.751	8.04e-10	0.769909	0.121	NOT	1.16656	0.459	NOT	1.2578	0.488	NOT	1.04785	0.369	NOT	1.44411	0.0803	NOT
TU0047	1	+	982660	983512			AT1G03870.1		368.43	3.24e-08	261.358	0.00370719	332.628	4.48e-05	521.726	4.58e-11	0.706175	0.0841	NOT	525.76	5.41e-11	0.497105	0.0946	NOT	302.529	0.000519524	1.09949	0.203	NOT	0.709383	0.222	NOT	0.902826	0.128	NOT	1.00773	0.225	NOT	0.579862	0.0301	DIFF
TU0048	1	-	989192	993509			AT1G03890.1,AT1G03900.1,AT1G03905.1		323.166	7.12e-05	284.577	1.26e-05	333.792	2.47e-08	338.919	1.91e-08	0.95352	0.302	NOT	460.774	2.07e-11	0.617606	0.0812	NOT	394.492	1.39e-05	0.846131	0.373	NOT	0.880591	0.302	NOT	1.03288	0.336	NOT	1.35954	0.33	NOT	1.16397	0.272	NOT
TU0049	1	+	1008900	1011234			AT1G03940.1,AT1G03950.1		563.075	1.03e-17	1318.87	2.8e-19	4366.9	6.8e-41	475.096	2.21e-10	1.18518	0.165	NOT	1126.21	3.72e-22	1.17107	0.315	NOT	5149.62	4.97e-46	0.848004	0.104	NOT	2.34226	0.00169	DIFF	7.75545	4.11e-14	DIFF	2.37049	0.000522	DIFF	10.8391	0	DIFF
TU0050	1	-	1023860	1027731			AT1G03990.1		523.032	5.09e-11	378.271	1.14e-13	381.955	1.1e-12	382.84	1.83e-09	1.36619	0.0802	NOT	389.845	8.31e-12	0.970311	0.451	NOT	368.997	1.6e-17	1.03512	0.388	NOT	0.723227	0.0691	NOT	0.730271	0.149	NOT	1.0183	0.469	NOT	0.963841	0.443	NOT
TU0051	1	-	1136244	1137622			AT1G04250.1		862.562	1.35e-11	563.585	0.0132495	603.539	0.0104409	1118.59	1.56e-09	0.771115	0.197	NOT	792.927	5.91e-10	0.710765	0.0436	NOT	455.796	2.61e-05	1.32414	0.177	NOT	0.653385	0.00961	DIFF	0.699705	0.0159	DIFF	0.708863	0.0682	NOT	0.407474	8.36e-05	DIFF
TU0052	1	+	1155838	1157938			AT1G04310.1		282.132	1.34e-07	465.537	5.94e-11	357.853	3.69e-05	446.879	4.47e-08	0.631339	0.0368	NOT	298.62	2.07e-06	1.55896	0.0447	NOT	392.71	2.81e-07	0.91124	0.105	NOT	1.65007	0.0205	NOT	1.26839	0.457	NOT	0.668235	0.0732	NOT	0.878784	0.358	NOT
TU0053	1	+	1185680	1187470			AT1G04400.1		419.093	1.39e-11	359.591	6.86e-08	275.254	0.000245591	465.223	1.68e-10	0.900843	0.304	NOT	360.022	1.07e-05	0.998803	0.464	NOT	299.693	3.96e-07	0.918453	0.162	NOT	0.858022	0.203	NOT	0.656785	0.0202	DIFF	0.77387	0.0601	NOT	0.644192	0.038	DIFF
TU0054	1	+	1189106	1190431			AT1G04410.1		420.331	1.37e-06	265.905	0.000111892	270.327	1.12e-08	326.402	9.84e-06	1.28777	0.315	NOT	250.235	2.21e-05	1.06262	0.255	NOT	356.394	3.7e-09	0.758506	0.0787	NOT	0.632609	0.102	NOT	0.643129	0.0615	NOT	0.766647	0.0826	NOT	1.09189	0.36	NOT
TU0055	1	-	1198776	1201331			AT1G04430.1		376.911	1.04e-10	205.24	4.69e-05	207.881	0.00756719	305.475	3.73e-07	1.23385	0.242	NOT	210.919	0.00111735	0.973075	0.307	NOT	191.891	3.86e-05	1.08333	0.407	NOT	0.544532	0.000746	DIFF	0.551539	0.00165	DIFF	0.690462	0.00279	DIFF	0.628173	0.00601	DIFF
TU0056	1	+	1235469	1236075			AT1G04530.1		792.338	7.71e-10	482.398	5.56e-05	507.493	3.8e-09	1014.64	1.58e-07	0.780906	0.459	NOT	589.102	4.85e-06	0.81887	0.187	NOT	431.991	0.00374118	1.17478	0.143	NOT	0.608829	0.099	NOT	0.640501	0.248	NOT	0.580602	0.389	NOT	0.425758	0.0706	NOT
TU0057	1	+	1289747	1290216			AT1G04630.1		537.804	6.01e-11	548.969	5.18e-08	447.773	2.44e-05	461.43	4.82e-06	1.16552	0.138	NOT	286.087	0.0700499	1.91889	0.0469	NOT	466.447	5.51e-05	0.959965	0.391	NOT	1.02076	0.342	NOT	0.832595	0.121	NOT	0.620001	0.431	NOT	1.01087	0.415	NOT
TU0058	1	-	1292360	1293141			AT1G04640.1		459.775	4.96e-08	322.029	4.16e-05	317.497	0.000131149	497.23	1.25e-13	0.924673	0.182	NOT	286.096	0.00557077	1.1256	0.489	NOT	237.287	0.00316226	1.33803	0.375	NOT	0.700406	0.0962	NOT	0.690549	0.0347	NOT	0.57538	0.00267	DIFF	0.477218	0.00237	DIFF
TU0059	1	-	1323947	1324572			AT1G04710.1		656.93	8.41e-10	412.67	8.05e-06	464.316	0.000143388	272.802	0.000625738	2.40808	0.206	NOT	233.468	0.000235629	1.76757	0.196	NOT	203.312	0.000268568	2.28376	0.192	NOT	0.62818	0.295	NOT	0.706797	0.269	NOT	0.855815	0.235	NOT	0.745273	0.161	NOT
TU0060	1	+	1336446	1337192			AT1G04770.1		592.317	4.17e-08	793.003	2.3e-13	517.053	9.81e-06	498.947	2.38e-05	1.18713	0.2	NOT	724.738	4.66e-10	1.09419	0.397	NOT	510.397	2.19e-06	1.01304	0.407	NOT	1.33882	0.155	NOT	0.872933	0.242	NOT	1.45254	0.0723	NOT	1.02295	0.391	NOT
TU0061	1	+	1348597	1349032			AT1G04800.1		10160.8	3.69e-26	8840.03	4.01e-16	8675.29	2.85e-16	8674.45	3.89e-21	1.17135	0.466	NOT	5121.39	1.23e-16	1.7261	0.22	NOT	7806.1	1.5e-15	1.11135	0.375	NOT	0.870013	0.35	NOT	0.8538	0.385	NOT	0.590399	0.158	NOT	0.899896	0.295	NOT
TU0062	1	-	1352722	1355242			AT1G04810.1		335.001	1.67e-09	442.735	1.93e-09	333.538	1.15e-10	301.693	3.57e-06	1.1104	0.228	NOT	350.268	6.95e-08	1.26399	0.205	NOT	324.788	1.08e-06	1.02694	0.218	NOT	1.32159	0.143	NOT	0.995633	0.242	NOT	1.16101	0.17	NOT	1.07655	0.205	NOT
TU0063	1	-	1362341	1362722					571.026	6.48e-06	534.179	8.01e-12	603.065	1.13e-15	557.516	1.48e-09	1.02423	0.351	NOT	481.119	1.25e-06	1.11028	0.369	NOT	802.809	1.82e-10	0.751194	0.26	NOT	0.935472	0.444	NOT	1.05611	0.307	NOT	0.862969	0.49	NOT	1.43997	0.0746	NOT
TU0064	1	-	1399940	1400639			AT1G04940.1		1035.99	1.99e-09	688.839	9.69e-12	968.978	1.53e-10	593.137	4.42e-16	1.74663	0.173	NOT	367.596	3.73e-07	1.8739	0.136	NOT	365.501	1.57e-07	2.6511	0.0204	NOT	0.664909	0.121	NOT	0.935316	0.377	NOT	0.619749	0.125	NOT	0.616217	0.0803	NOT
TU0065	1	+	1431416	1432884			AT1G05010.1		1335	1.45e-13	1492.34	1.44e-19	1353.28	1.38e-17	1918.57	8.2e-19	0.695831	0.108	NOT	1490.19	4.07e-14	1.00144	0.274	NOT	1201.64	5.94e-16	1.12619	0.347	NOT	1.11786	0.227	NOT	1.01369	0.383	NOT	0.776719	0.146	NOT	0.626321	0.0858	NOT
TU0066	1	-	1469704	1470689			AT1G05100.1		553.947	6.65e-10	370.171	2.85e-07	521.983	1.22e-07	364.663	1.82e-06	1.51907	0.162	NOT	714.395	6.08e-12	0.51816	0.107	NOT	572.393	3.15e-12	0.911931	0.432	NOT	0.668243	0.0622	NOT	0.942298	0.234	NOT	1.95906	0.251	NOT	1.56965	0.379	NOT
TU0067	1	-	1477528	1478996				TU0068	2133.51	1.24e-17	2186.42	2.51e-15	1949	3.94e-15	2398.25	8.72e-19	0.889611	0.228	NOT	2665.21	8.9e-17	0.820356	0.491	NOT	3038.86	2.03e-20	0.641359	0.368	NOT	1.0248	0.348	NOT	0.913518	0.483	NOT	1.11131	0.412	NOT	1.26712	0.303	NOT
TU0068	1	+	1477613	1478761				TU0067	18322.8	7.61e-35	14010.7	1.17e-35	16451.9	1.29e-34	15908.7	1.35e-37	1.15175	0.402	NOT	12358.3	1.43e-37	1.13371	0.328	NOT	12634.7	6.93e-34	1.30212	0.391	NOT	0.764659	0.403	NOT	0.897892	0.387	NOT	0.776827	0.163	NOT	0.794201	0.198	NOT
TU0069	1	+	1502509	1503235			AT1G05190.1		4069.81	5.1e-17	4476.51	1.84e-14	3042.27	1.27e-17	6004.04	1.68e-16	0.677845	0.0942	NOT	4247.46	3.36e-13	1.05393	0.441	NOT	2140.45	8.69e-13	1.42132	0.367	NOT	1.09993	0.441	NOT	0.747521	0.245	NOT	0.707434	0.0576	NOT	0.356502	0.0346	DIFF
TU0070	1	-	1555107	1557072			AT1G05320.1		519.524	2.24e-12	378.52	9.85e-07	437.081	7.04e-08	781.119	1.88e-13	0.665102	0.143	NOT	424.587	2.67e-08	0.891502	0.245	NOT	265.453	2.27e-05	1.64655	0.265	NOT	0.72859	0.211	NOT	0.841311	0.105	NOT	0.543563	0.0082	DIFF	0.339837	0.0015	DIFF
TU0071	1	+	1601488	1603234			AT1G05460.1		442.261	7.39e-12	464.389	1.22e-11	563.045	2.82e-12	562.423	1.49e-15	0.786349	0.188	NOT	418.126	1.31e-09	1.11064	0.275	NOT	387.889	1.2e-08	1.45156	0.428	NOT	1.05003	0.418	NOT	1.27311	0.455	NOT	0.743437	0.106	NOT	0.689675	0.293	NOT
TU0072	1	-	1628837	1629203			AT1G05500.1		820.156	8.53e-06	725.036	3.33e-05	409.273	0.000297977	986.55	7.3e-11	0.831337	0.22	NOT	553.189	2.28e-07	1.31065	0.319	NOT	567	5.36e-08	0.721822	0.145	NOT	0.884022	0.249	NOT	0.499018	0.0713	NOT	0.560731	0.0178	DIFF	0.57473	0.025	DIFF
TU0073	1	+	1645476	1647402	AT1G05562	AT1G05562	AT1G05560.1		1752.11	8.07e-29	1940.98	7.01e-36	1563.17	4.56e-32	1846.16	3.38e-33	0.949056	0.456	NOT	1510.23	2.85e-22	1.28522	0.0501	NOT	1312.27	4.54e-30	1.1912	0.177	NOT	1.1078	0.274	NOT	0.892164	0.198	NOT	0.818039	0.12	NOT	0.710811	0.0316	DIFF
TU0074	1	-	1697494	1698517	AT1G05670	AT1G05670			487.992	1.79e-09	906.368	1.05e-16	1008.2	2.19e-13	760.633	3.8e-14	0.64156	0.154	NOT	718.884	8.91e-10	1.2608	0.0219	NOT	999.838	2.17e-14	1.00836	0.257	NOT	1.85734	0.00213	DIFF	2.06602	0.082	NOT	0.945113	0.308	NOT	1.31448	0.126	NOT
TU0075	1	-	1744468	1745358			AT1G05805.1		565.038	3.32e-11	445.525	4.34e-09	361.08	2.42e-08	456.349	3e-09	1.23817	0.161	NOT	532.661	6.44e-11	0.836414	0.34	NOT	328.097	5.56e-05	1.10053	0.279	NOT	0.788487	0.202	NOT	0.639037	0.0474	NOT	1.16722	0.279	NOT	0.718961	0.124	NOT
TU0076	1	+	1765842	1768114			AT1G05850.1		1728.76	1.58e-17	1273.65	1.27e-12	1014.66	4.4e-12	2551.22	1.38e-16	0.677621	0.0684	NOT	1887.73	5.76e-14	0.674699	0.138	NOT	1138.34	8.8e-12	0.891351	0.48	NOT	0.736742	0.0444	NOT	0.586929	0.0252	DIFF	0.739932	0.0617	NOT	0.446194	0.00119	DIFF
TU0077	1	-	1795696	1797576			AT1G05910.1,AT1G05920.1		269.543	0.0114461	318.917	4.59e-07	298.512	7.66e-05	435.293	7.49e-10	0.619222	0.0632	NOT	251.991	3.99e-05	1.26559	0.488	NOT	385.701	1.41e-05	0.773947	0.26	NOT	1.18318	0.308	NOT	1.10747	0.417	NOT	0.5789	0.117	NOT	0.886072	0.269	NOT
TU0078	1	+	1811099	1811765			AT1G05960.1		424.331	1.11e-05	332.679	0.00323987	305.6	0.00422701	330.572	0.000238937	1.28363	0.0994	NOT	561.183	3.63e-09	0.592817	0.0109	NOT	298.127	0.00475029	1.02507	0.281	NOT	0.784008	0.0869	NOT	0.720192	0.0908	NOT	1.69761	0.0178	DIFF	0.901852	0.27	NOT
TU0079	1	+	1820429	1821888	AT1G06002	AT1G06002	AT1G06000.1		504.381	2.69e-11	523.838	6.87e-10	703.52	1.08e-19	574.391	9.57e-19	0.878114	0.429	NOT	608.718	1.19e-08	0.860559	0.33	NOT	577.079	9.26e-15	1.21911	0.29	NOT	1.03858	0.387	NOT	1.39482	0.103	NOT	1.05976	0.496	NOT	1.00468	0.294	NOT
TU0080	1	-	1823470	1823789			AT1G06010.1		767.818	3.47e-14	506.854	0.000190534	622.436	7.77e-05	410.24	0.00498268	1.87163	0.042	NOT	762.657	5.68e-08	0.66459	0.261	NOT	652.709	0.00151579	0.953619	0.416	NOT	0.660123	0.0652	NOT	0.810656	0.0542	NOT	1.85905	0.19	NOT	1.59104	0.43	NOT
TU0081	1	-	1826731	1827678			AT1G06030.1		129.897	0.69268	279.581	0.0011184	136.143	0.199596	191.753	0.0239865	0.677418	0.147	NOT	811.653	4.76e-09	0.344459	0.00555	NOT	300.825	7.3e-05	0.452565	0.0481	NOT	2.15233	0.0133	DIFF	1.04808	0.399	NOT	4.2328	4.75e-05	DIFF	1.56882	0.234	NOT
TU0082	1	+	1828419	1831664			AT1G06040.1		370.627	3.21e-06	434.514	2.03e-13	351.606	1.59e-12	452.081	5.33e-10	0.819824	0.185	NOT	322.553	3.4e-09	1.34711	0.0233	NOT	286.505	6.73e-05	1.22722	0.298	NOT	1.17238	0.116	NOT	0.948679	0.44	NOT	0.713485	0.049	NOT	0.633747	0.0517	DIFF
TU0083	1	+	1892304	1893639			AT1G06190.1		310.297	1.36e-05	290.658	1.14e-07	452.72	3.9e-11	433.953	1.78e-13	0.715047	0.128	NOT	437.44	1.53e-09	0.664452	0.0841	NOT	233.521	0.00321843	1.93867	0.00548	NOT	0.936709	0.442	NOT	1.45899	0.0745	NOT	1.00804	0.48	NOT	0.538125	0.013	DIFF
TU0084	1	+	1913334	1914980			AT1G06250.1,AT1G06265.1		412.04	1.72e-16	469.756	4.53e-15	484.661	2.9e-11	442.059	7.15e-12	0.932093	0.201	NOT	399.329	4.66e-10	1.17636	0.0156	NOT	722.845	3.26e-23	0.670491	0.0232	NOT	1.14007	0.0444	NOT	1.17625	0.133	NOT	0.903339	0.128	NOT	1.63518	0.00754	DIFF
TU0085	1	+	1939162	1939563			AT1G06360.1		1561.15	3.96e-06	1187.45	1.42e-09	644.87	1.07e-09	1973.96	1.92e-11	0.790872	0.153	NOT	821.59	1.2e-07	1.44531	0.324	NOT	965.526	0.000129602	0.667895	0.0879	NOT	0.760625	0.483	NOT	0.413074	0.119	NOT	0.416214	0.0709	NOT	0.489131	0.112	NOT
TU0086	1	-	1942650	1945813			AT1G06380.1		457.223	4.87e-09	470.702	1.01e-15	394.996	5e-10	452.568	2.2e-12	1.01029	0.463	NOT	439.063	1.67e-05	1.07206	0.273	NOT	435.517	2.97e-07	0.906959	0.37	NOT	1.02948	0.38	NOT	0.863902	0.156	NOT	0.970159	0.131	NOT	0.962324	0.0679	NOT
TU0087	1	+	1950939	1951505			AT1G06400.1		503.254	5.55e-06	570.34	8.71e-09	549.238	1.3e-07	547.18	2.65e-07	0.919723	0.0654	NOT	681.778	1.89e-08	0.836548	0.357	NOT	483.665	5.35e-08	1.13558	0.418	NOT	1.1333	0.23	NOT	1.09137	0.26	NOT	1.24598	0.469	NOT	0.883923	0.265	NOT
TU0088	1	-	1955398	1959515			AT1G06420.1		1093.74	2.42e-13	1049.74	1.39e-10	1663.55	1.97e-15	989.346	1.8e-07	1.10552	0.262	NOT	1039.26	1.47e-10	1.01008	0.4	NOT	787.498	1.97e-12	2.11245	0.0216	NOT	0.959771	0.16	NOT	1.52097	0.208	NOT	1.05045	0.494	NOT	0.795978	0.35	NOT
TU0089	1	-	2001324	2002559			AT1G06530.1		960.51	2.59e-10	655.299	7.55e-11	554.491	2.79e-09	842.017	3.02e-11	1.14073	0.451	NOT	716.308	8.1e-13	0.914829	0.451	NOT	661.301	5.07e-08	0.838485	0.385	NOT	0.682241	0.187	NOT	0.577288	0.125	NOT	0.850705	0.289	NOT	0.785377	0.0949	NOT
TU0090	1	+	2002874	2003302			AT1G06540.1		254.449	2.48e-05	262.455	1.9e-05	526.122	7.9e-12	240.026	2.27e-05	1.06009	0.421	NOT	440.639	3.56e-06	0.595624	0.055	NOT	213.08	1.87e-05	2.46913	0.00071	DIFF	1.03146	0.481	NOT	2.06769	0.000451	DIFF	1.8358	0.0295	DIFF	0.887737	0.343	NOT
TU0091	1	+	2034228	2035826	AT1G06645	AT1G06645			2022.54	1.44e-28	1736.56	3.99e-33	1746.91	2.12e-32	2380.03	1.04e-28	0.849796	0.191	NOT	1854.42	1.71e-27	0.936444	0.39	NOT	2111.52	5.78e-28	0.827323	0.205	NOT	0.858604	0.194	NOT	0.863721	0.283	NOT	0.779158	0.0556	NOT	0.887182	0.235	NOT
TU0092	1	-	2043403	2049513			AT1G06670.1,AT1G06680.1		1202.3	5.59e-20	1026.63	7.33e-22	729.634	1.05e-18	1029.36	4.13e-22	1.16801	0.277	NOT	965.983	1.17e-16	1.06278	0.12	NOT	754.922	4.19e-17	0.966503	0.397	NOT	0.853888	0.312	NOT	0.606865	0.0489	NOT	0.938431	0.0871	NOT	0.73339	0.0181	DIFF
TU0093	1	+	2051786	2054251			AT1G06690.1,AT1G06700.1		418.688	3.05e-09	354.223	4.16e-07	391.78	2.83e-07	383.18	4.6e-10	1.09267	0.379	NOT	466.571	2.53e-11	0.759205	0.0454	NOT	422.216	2.15e-08	0.927914	0.443	NOT	0.846031	0.232	NOT	0.935733	0.386	NOT	1.21763	0.0981	NOT	1.10187	0.393	NOT
TU0094	1	-	2055918	2057013		AT1G06710			555.515	1.99e-09	648.906	2.18e-14	790.64	1.67e-14	545.253	2.72e-08	1.01882	0.305	NOT	600.572	3.23e-09	1.08048	0.36	NOT	1235.88	2.13e-13	0.639738	0.0359	NOT	1.16812	0.0638	NOT	1.42326	0.0623	NOT	1.10146	0.253	NOT	2.26662	0.00554	DIFF
TU0095	1	-	2069661	2070223			AT1G06730.1		621.594	3.59e-10	540.003	5.98e-17	520.65	1.2e-06	509.328	1.18e-07	1.22042	0.135	NOT	461.513	1.39e-07	1.17007	0.27	NOT	415.146	3.46e-06	1.25414	0.129	NOT	0.868739	0.299	NOT	0.837605	0.236	NOT	0.906121	0.374	NOT	0.815086	0.215	NOT
TU0096	1	+	2076651	2077914			AT1G06760.1		1859.49	1.49e-11	1564.08	3.4e-15	1384.08	1.2e-11	1868.79	4.7e-13	0.995024	0.408	NOT	1201.14	1.03e-09	1.30216	0.124	NOT	554.875	7.51e-08	2.4944	0.0399	NOT	0.841134	0.343	NOT	0.744333	0.313	NOT	0.642737	0.133	NOT	0.296917	0.00456	DIFF
TU0097	1	-	2086478	2087054			AT1G06780.1		542.597	7.29e-10	476.828	6.33e-10	439.244	6.56e-06	429.351	9.22e-08	1.26376	0.205	NOT	296.274	0.000117225	1.60942	0.0925	NOT	526.615	4.41e-08	0.834089	0.284	NOT	0.878788	0.229	NOT	0.809522	0.0855	NOT	0.690051	0.075	NOT	1.22654	0.479	NOT
TU0098	1	+	2090147	2091440			AT1G06800.1		490.543	4.75e-09	443.053	2.68e-11	597.776	2.67e-12	416.038	2.43e-11	1.17908	0.486	NOT	639.493	1.72e-12	0.692819	0.235	NOT	374.032	6.54e-09	1.59819	0.133	NOT	0.903189	0.5	NOT	1.2186	0.235	NOT	1.5371	0.248	NOT	0.899033	0.382	NOT
TU0099	1	-	2110484	2110799			AT1G06870.1		510.402	4.42e-08	321.748	0.000235834	275.673	0.138801	569.644	3.7e-10	0.896002	0.064	NOT	170.585	0.00145199	1.88614	0.0525	NOT	262.945	0.0587914	1.04841	0.262	NOT	0.630382	0.0945	NOT	0.54011	0.0281	DIFF	0.299459	7.27e-05	DIFF	0.461595	0.00029	DIFF
TU0100	1	+	2130347	2132080			AT1G06950.1		428.717	3.81e-12	324.605	1.14e-07	271.449	3.73e-07	386.361	1.28e-09	1.10963	0.436	NOT	340.549	1.43e-07	0.953181	0.249	NOT	264.447	0.00010216	1.02648	0.281	NOT	0.757154	0.04	NOT	0.633166	0.03	DIFF	0.881427	0.185	NOT	0.684456	0.00752	DIFF
TU0101	1	+	2142887	2143943			AT1G06980.1		351.025	6.98e-08	315.362	8.53e-07	372.831	3.37e-06	473.887	3.33e-09	0.740736	0.178	NOT	298.004	6.73e-05	1.05825	0.0438	NOT	334.882	4.14e-06	1.11332	0.434	NOT	0.898403	0.42	NOT	1.06212	0.263	NOT	0.62885	0.0126	DIFF	0.706671	0.0669	DIFF
TU0102	1	+	2164424	2165174			AT1G07050.1		885.6	7.38e-10	458.352	0.00875343	625.703	9.37e-06	771.239	6.75e-07	1.14828	0.306	NOT	603.107	0.0019071	0.759985	0.373	NOT	737.254	5.3e-11	0.848694	0.273	NOT	0.517561	0.0255	NOT	0.70653	0.183	NOT	0.781998	0.0825	NOT	0.955935	0.418	NOT
TU0103	1	-	2187538	2188451	AT1G07128	AT1G07128	AT1G07130.1		1060.92	6.07e-15	1122.82	4.86e-11	932.488	2.19e-11	1113.22	8.12e-13	0.953019	0.482	NOT	1203.81	1.26e-17	0.932722	0.31	NOT	1044.05	3.15e-19	0.893145	0.201	NOT	1.05835	0.299	NOT	0.878943	0.209	NOT	1.08138	0.455	NOT	0.937865	0.453	NOT
TU0104	1	+	2190217	2192577			AT1G07140.1		2308.53	1.47e-12	2158.76	8.2e-10	2068.11	3.46e-08	2913.55	1.62e-12	0.792343	0.273	NOT	2651.31	1.73e-10	0.814224	0.441	NOT	1818.41	1.17e-11	1.13732	0.248	NOT	0.935123	0.406	NOT	0.895856	0.185	NOT	0.909993	0.163	NOT	0.624122	0.102	NOT
TU0105	1	+	2194789	2195948			AT1G07150.1		417.69	3.26e-10	345.882	4.04e-07	311.44	2.95e-08	257.873	2.91e-07	1.61975	0.0835	NOT	243.835	5.52e-06	1.41851	0.208	NOT	209.262	2.42e-05	1.48828	0.214	NOT	0.828083	0.187	NOT	0.745625	0.162	NOT	0.945562	0.406	NOT	0.811492	0.338	NOT
TU0106	1	-	2199761	2201074			AT1G07170.1		458.466	3.59e-13	455.022	3.24e-15	635.237	1.46e-10	683.427	9.19e-12	0.670834	0.124	NOT	604.882	2.77e-10	0.752249	0.387	NOT	576.901	3.6e-10	1.10112	0.188	NOT	0.992488	0.477	NOT	1.38557	0.17	NOT	0.885072	0.186	NOT	0.84413	0.149	NOT
TU0107	1	-	2223793	2227419			AT1G07240.1		752.035	1.43e-23	581.661	6.81e-15	438.836	2.08e-08	553.496	1.54e-14	1.3587	0.0319	NOT	595.633	3.18e-18	0.976543	0.413	NOT	472.811	1.12e-16	0.928143	0.162	NOT	0.773449	0.025	NOT	0.583531	0.000211	DIFF	1.07613	0.48	NOT	0.854227	0.234	NOT
TU0108	1	-	2249118	2250427			AT1G07320.1		2009.17	3.61e-24	1769.31	2.15e-23	1547.38	2.31e-25	2424.49	1.99e-33	0.828698	0.236	NOT	1387.89	1.71e-17	1.27482	0.188	NOT	1300.8	3.45e-14	1.18956	0.325	NOT	0.880617	0.4	NOT	0.770159	0.268	NOT	0.572446	0.0391	DIFF	0.536525	0.0363	DIFF
TU0109	1	+	2257533	2258462			AT1G07350.1		542.692	7.28e-07	1483.4	1.16e-16	1459	5.44e-19	523.853	1.79e-07	1.03596	0.328	NOT	1376.06	1.27e-17	1.07801	0.345	NOT	1263.84	2.07e-18	1.15442	0.39	NOT	2.73341	0.174	NOT	2.68845	0.0904	NOT	2.62681	0.198	NOT	2.41259	0.0726	NOT
TU0110	1	-	2275015	2275750			AT1G07400.1		278.05	0.127411	1707.85	4.03e-20	1013.1	3.36e-14	174.18	0.280184	1.59634	0.141	NOT	2380.78	4.86e-16	0.717349	0.407	NOT	1300.04	6.41e-18	0.779284	0.227	NOT	6.14224	9.67e-05	DIFF	3.64359	0.00794	DIFF	13.6685	1.15e-05	DIFF	7.46377	0.000392	DIFF
TU0111	1	+	2294780	2295443			AT1G07473.1		913.577	7.17e-11	584.243	8.4e-08	555.656	8.16e-09	448.349	9.32e-06	2.03765	0.265	NOT	707.198	2.06e-06	0.826138	0.449	NOT	570.865	6.89e-07	0.973358	0.49	NOT	0.639512	0.283	NOT	0.60822	0.214	NOT	1.57734	0.409	NOT	1.27326	0.465	NOT
TU0112	1	-	2308881	2309449			AT1G07510.1		696.231	2.05e-10	1226.12	1.71e-13	968.827	3.29e-08	910.941	9.39e-14	0.764299	0.224	NOT	1344.66	1.02e-15	0.911844	0.292	NOT	1165.04	1.51e-18	0.831583	0.189	NOT	1.76108	0.107	NOT	1.39153	0.456	NOT	1.47612	0.395	NOT	1.27894	0.421	NOT
TU0113	1	-	2341571	2342016			AT1G07610.1		3940.36	1.35e-08	3498.75	6.59e-09	2593.12	1.27e-07	3762.8	2.65e-10	1.04719	0.377	NOT	3550.18	4.67e-11	0.985513	0.358	NOT	3373.2	2.85e-18	0.768742	0.229	NOT	0.887926	0.415	NOT	0.658092	0.148	NOT	0.943494	0.465	NOT	0.89646	0.252	NOT
TU0114	1	+	2386321	2388034			AT1G07710.1		349.395	2.46e-06	264.16	3.64e-06	269.745	8.81e-05	291.233	1.09e-06	1.19971	0.13	NOT	378.235	1.14e-10	0.698402	0.00811	NOT	429.061	7.11e-12	0.628687	0.016	NOT	0.75605	0.0137	DIFF	0.772035	0.0778	NOT	1.29874	0.105	NOT	1.47326	0.027	DIFF
TU0115	1	+	2407627	2408830					3324.55	4.66e-13	702.989	6.86e-08	1100.33	2.48e-10	4213.57	7.06e-19	0.78901	0.234	NOT	1844.89	8.84e-17	0.381047	0.0199	NOT	1577	3.06e-11	0.697736	0.434	NOT	0.211454	0.00741	DIFF	0.330971	0.0495	NOT	0.437845	0.0499	NOT	0.374267	0.0125	DIFF
TU0116	1	+	2421226	2421744			AT1G07820.1		2871.15	1.02e-09	1951.6	2.63e-06	1623.95	7.14e-07	2352.35	8.41e-11	1.22055	0.299	NOT	1402.98	6.17e-07	1.39104	0.231	NOT	1834.61	8.07e-08	0.885175	0.347	NOT	0.679728	0.0569	NOT	0.56561	0.0461	NOT	0.596416	0.04	DIFF	0.779905	0.181	NOT
TU0117	1	-	2435975	2440111			AT1G07890.1		410.998	4.11e-07	621.198	2.48e-10	484.529	7.39e-10	543.422	1.11e-07	0.756315	0.344	NOT	717.979	9.96e-09	0.865204	0.486	NOT	468.041	3.98e-08	1.03523	0.479	NOT	1.51144	0.0525	NOT	1.17891	0.416	NOT	1.32122	0.117	NOT	0.861285	0.288	NOT
TU0118	1	+	2444041	2445132			AT1G07901.1		1580.28	4e-22	1697.51	6.6e-19	1632.33	1.18e-19	1580.12	4.94e-20	1.0001	0.405	NOT	3035.63	4.61e-32	0.559195	0.000175	DIFF	2337.7	4.98e-29	0.698263	0.0155	NOT	1.07418	0.351	NOT	1.03294	0.429	NOT	1.92114	8.16e-06	DIFF	1.47944	0.00414	DIFF
TU0119	1	-	2458992	2460726			AT1G07930.1		765.2	1.08e-09	576.042	8.35e-13	476.543	1.38e-05	884.938	6.23e-10	0.864693	0.4	NOT	634.076	2.39e-12	0.908475	0.38	NOT	459.323	1.34e-07	1.03749	0.45	NOT	0.752799	0.391	NOT	0.622769	0.199	NOT	0.71652	0.359	NOT	0.519045	0.146	NOT
TU0120	1	-	2468491	2468990			AT1G07960.1		542.277	3.88e-09	461.652	4.63e-08	359.702	0.00115647	572.123	1.78e-08	0.947833	0.457	NOT	536.836	6.77e-09	0.85995	0.451	NOT	286.724	0.000132214	1.25452	0.46	NOT	0.851321	0.347	NOT	0.663318	0.255	NOT	0.938323	0.277	NOT	0.501158	0.178	NOT
TU0121	1	-	2475272	2475947			AT1G07985.1		356.06	0.00241549	359.65	0.00247164	560.246	1.01e-08	332.518	3.34e-06	1.0708	0.136	NOT	545.403	3.99e-05	0.659421	0.485	NOT	595.281	1.31e-09	0.941145	0.334	NOT	1.01008	0.487	NOT	1.57346	0.267	NOT	1.64022	0.138	NOT	1.79022	0.0246	DIFF
TU0122	1	-	2482127	2483091			AT1G07990.1		2529.8	2.98e-19	3167.26	4.82e-17	1621.66	2.47e-11	1591.97	9.45e-20	1.5891	0.457	NOT	1905.38	2.39e-14	1.66227	0.193	NOT	1848.68	2.91e-12	0.877199	0.486	NOT	1.25198	0.333	NOT	0.641023	0.322	NOT	1.19687	0.255	NOT	1.16125	0.265	NOT
TU0123	1	+	2485980	2486879			AT1G08010.1		983.258	2.34e-08	934.503	1.02e-13	917.735	1.64e-14	848.237	2.04e-16	1.15918	0.353	NOT	647.837	1.99e-12	1.4425	0.0638	NOT	631.69	4.64e-10	1.45282	0.121	NOT	0.950415	0.459	NOT	0.933361	0.408	NOT	0.763745	0.0658	NOT	0.744709	0.0947	NOT
TU0124	1	+	2585991	2586551			AT1G08230.2		342.01	0.00846013	755.469	5.14e-07	1512.33	1.8e-10	575.25	1.68e-05	0.594542	0.0413	NOT	843.774	3.94e-07	0.895345	0.469	NOT	1588.43	1.34e-07	0.952091	0.438	NOT	2.20891	0.015	DIFF	4.42189	0.00999	DIFF	1.4668	0.299	NOT	2.76129	0.188	NOT
TU0125	1	+	2607021	2608385					1736.29	1.55e-17	1146.63	6.04e-10	2311.26	1.64e-15	2775.73	4.61e-18	0.625526	0.177	NOT	1852.74	5.06e-21	0.618883	0.0288	NOT	2056.38	5.29e-23	1.12395	0.346	NOT	0.660391	0.0611	NOT	1.33115	0.283	NOT	0.667478	0.283	NOT	0.740843	0.283	NOT
TU0126	1	+	2617176	2618391	AT1G08300	AT1G08300		TU0127	289.457	3.69e-05	1412.92	8.72e-18	1450.77	2.04e-19	273.65	0.0206161	1.05776	0.397	NOT	1535.16	8.07e-18	0.920373	0.345	NOT	1450.71	6.8e-19	1.00004	0.43	NOT	4.88128	0.00034	DIFF	5.01204	6.15e-06	DIFF	5.60994	9.01e-06	DIFF	5.30133	4.24e-08	DIFF
TU0127	1	-	2617836	2618421				TU0126	335.502	0.00343709	368.702	0.000269297	618.088	7.97e-09	189.542	0.0250045	1.77007	0.207	NOT	475.457	4.42e-07	0.775469	0.5	NOT	438.136	1.57e-07	1.41072	0.226	NOT	1.09896	0.372	NOT	1.84228	0.0935	NOT	2.50845	0.219	NOT	2.31155	0.103	NOT
TU0128	1	-	2637451	2637743			AT1G08360.1		1109.62	2.48e-07	887.404	6.44e-05	823.432	7.58e-06	1594.77	6.47e-11	0.695787	0.118	NOT	520.596	0.000290097	1.70459	0.164	NOT	855.996	4e-05	0.961958	0.493	NOT	0.799737	0.181	NOT	0.742085	0.1	NOT	0.32644	0.00621	DIFF	0.536752	0.011	DIFF
TU0129	1	+	2641016	2641775			AT1G08380.1		5019.46	1.83e-15	4235.65	6.48e-15	4006.52	1.01e-11	4956.93	1.85e-17	1.01261	0.403	NOT	4952.48	1.24e-14	0.855258	0.417	NOT	2720.67	2.05e-09	1.47262	0.122	NOT	0.843846	0.468	NOT	0.798197	0.263	NOT	0.999102	0.396	NOT	0.548862	0.0198	DIFF
TU0130	1	-	2672478	2673940			AT1G08460.1		302.981	3.73e-07	305.235	7.43e-08	322.533	1.98e-09	254.246	1.27e-06	1.19168	0.0685	NOT	286.49	6.45e-07	1.06543	0.141	NOT	422.768	4.1e-16	0.762908	0.0367	NOT	1.00744	0.331	NOT	1.06453	0.377	NOT	1.12682	0.244	NOT	1.66283	0.00115	DIFF
TU0131	1	-	2685263	2685505			AT1G08480.1		1644.31	2.02e-13	803.842	8.24e-13	1189.24	2.64e-15	1353.42	6.49e-13	1.21493	0.277	NOT	1293.09	4.08e-15	0.621644	0.21	NOT	1208.05	1.14e-17	0.984429	0.233	NOT	0.488863	0.0887	NOT	0.723246	0.192	NOT	0.955424	0.173	NOT	0.892591	0.237	NOT
TU0132	1	-	2705564	2707119			AT1G08540.1,AT1G08550.1		3285.56	6.27e-14	2274.64	3.33e-11	2510.09	2.73e-14	3240.28	5.07e-12	1.01397	0.457	NOT	2826.6	1.24e-12	0.804727	0.393	NOT	1973.63	2.77e-15	1.27181	0.208	NOT	0.692314	0.164	NOT	0.763976	0.31	NOT	0.872332	0.188	NOT	0.609092	0.116	NOT
TU0133	1	-	2708427	2709492			AT1G08550.1		1771.86	6.7e-16	1447.08	9.02e-08	1637.29	4.38e-12	1270.18	5.16e-14	1.39497	0.302	NOT	1408.64	4.98e-14	1.02729	0.301	NOT	1083.74	7.09e-07	1.51078	0.357	NOT	0.816701	0.178	NOT	0.924052	0.396	NOT	1.10901	0.405	NOT	0.853218	0.475	NOT
TU0134	1	-	2713565	2714686			AT1G08570.1		907.059	8.56e-11	786.042	1.57e-11	510.017	1.05e-06	925.556	8.14e-11	0.980015	0.42	NOT	1215.55	1.59e-09	0.646655	0.201	NOT	519.16	3.4e-06	0.982389	0.25	NOT	0.866583	0.354	NOT	0.562275	0.0137	DIFF	1.31332	0.277	NOT	0.560917	0.0297	DIFF
TU0135	1	-	2718532	2721992	AT1G08592	AT1G08592	AT1G08590.1		330.402	9.42e-12	365.971	8.01e-12	363.187	1.14e-10	286.562	7.91e-12	1.15299	0.301	NOT	289.455	8.31e-12	1.26435	0.00925	NOT	362.612	5.2e-15	1.00159	0.255	NOT	1.10765	0.103	NOT	1.09923	0.205	NOT	1.0101	0.271	NOT	1.26539	0.0198	DIFF
TU0136	1	-	2752218	2752915			AT1G08650.1		391.08	5.62e-05	333.573	1.54e-08	313.549	1.21e-05	450.655	0.00023615	0.867804	0.311	NOT	955.83	1.91e-10	0.348988	0.0806	NOT	357.884	0.000552647	0.876119	0.186	NOT	0.852953	0.498	NOT	0.801752	0.196	NOT	2.12098	0.184	NOT	0.794142	0.337	NOT
TU0137	1	-	2778553	2779583			AT1G08720.1		564.048	9.65e-06	745.183	3.66e-07	1273.07	2.85e-09	1401.16	1.67e-09	0.402558	0.0366	NOT	823.289	9.54e-06	0.905129	0.354	NOT	638.237	0.0010898	1.99467	0.0223	NOT	1.32113	0.104	NOT	2.25702	0.0186	DIFF	0.587577	0.165	NOT	0.455506	0.0553	DIFF
TU0138	1	+	2821492	2821939			AT1G08820.1		705.775	9.74e-14	525.69	0.0279551	587.959	4.31e-05	621.034	3.91e-07	1.13645	0.202	NOT	547.623	0.000248591	0.959949	0.482	NOT	383.538	0.000156184	1.53299	0.165	NOT	0.744841	0.0496	NOT	0.833069	0.142	NOT	0.881792	0.367	NOT	0.61758	0.122	NOT
TU0139	1	-	2877470	2878140			AT1G08940.1		383.523	5.26e-06	485.142	6.57e-06	523.381	1.82e-06	735.327	6.56e-06	0.521568	0.253	NOT	873.53	1e-13	0.555381	0.0497	NOT	510.578	2.82e-08	1.02508	0.127	NOT	1.26496	0.316	NOT	1.36467	0.497	NOT	1.18795	0.102	NOT	0.694355	0.378	NOT
TU0140	1	-	2883134	2884082			AT1G08970.1		528.131	1.04e-15	430.584	5.64e-05	493.65	1.59e-06	418.294	1.23e-08	1.26258	0.154	NOT	441.417	2.61e-07	0.975459	0.114	NOT	450.152	3.06e-09	1.09663	0.298	NOT	0.815298	0.0404	NOT	0.934711	0.0791	NOT	1.05528	0.467	NOT	1.07616	0.496	NOT
TU0141	1	-	2927742	2928876			AT1G09070.1		598.667	8.05e-12	878.201	2.74e-14	580.102	1.98e-09	734.847	3.1e-17	0.814683	0.383	NOT	1414.45	4.72e-20	0.620878	0.0586	NOT	554.02	5.04e-11	1.04708	0.456	NOT	1.46693	0.06	NOT	0.968989	0.304	NOT	1.92482	0.00392	DIFF	0.753926	0.228	NOT
TU0142	1	+	2939770	2940159			AT1G09130.1		792.514	3.12e-05	848.163	3.81e-05	529.366	3.46e-05	958.069	2.24e-09	0.827199	0.211	NOT	796.989	2.8e-12	1.06421	0.258	NOT	600.089	0.000165375	0.882146	0.45	NOT	1.07022	0.416	NOT	0.667958	0.118	NOT	0.83187	0.431	NOT	0.626353	0.0407	DIFF
TU0143	1	+	2970390	2974116			AT1G09195.1,AT1G09200.1,AT1G09210.1		352.107	5.86e-09	324.351	7.7e-09	320.605	1.94e-10	347.408	1.22e-10	1.01353	0.162	NOT	448.939	4.79e-12	0.722483	0.00865	NOT	396.438	1.1e-09	0.808714	0.0218	NOT	0.921172	0.367	NOT	0.910533	0.216	NOT	1.29225	0.146	NOT	1.14113	0.416	NOT
TU0144	1	-	2988737	2990157			AT1G09250.1		704.471	1.04e-11	549.93	2.64e-14	444.225	2.01e-07	395.839	9.51e-08	1.77969	0.269	NOT	513.144	4.42e-07	1.07169	0.381	NOT	518.16	9.56e-07	0.857312	0.313	NOT	0.780628	0.36	NOT	0.63058	0.14	NOT	1.29635	0.497	NOT	1.30902	0.472	NOT
TU0145	1	-	2997492	2997969			AT1G09270.1		650.091	2.98e-19	382.433	5.09e-09	320.263	1.01e-05	774.351	5.09e-11	0.83953	0.346	NOT	534.617	2.18e-11	0.71534	0.097	NOT	260.615	6.69e-05	1.22887	0.211	NOT	0.588276	0.0155	DIFF	0.492643	0.0104	DIFF	0.690407	0.0955	NOT	0.336559	0.000823	DIFF
TU0146	1	-	3008987	3009825			AT1G09310.1		3930.87	7.73e-18	2843.55	1.39e-14	1828.36	1.16e-13	2538.19	2.24e-21	1.54869	0.26	NOT	3053.91	1.89e-18	0.931118	0.224	NOT	2244.51	8.93e-15	0.814592	0.381	NOT	0.723389	0.0845	NOT	0.465129	0.137	NOT	1.20318	0.1	NOT	0.884296	0.0728	NOT
TU0147	1	-	3017894	3018104			AT1G09340.1		2195.09	3.06e-11	1859.66	8.1e-07	1376.29	4.42e-05	1753.74	1.54e-08	1.25166	0.295	NOT	2265.87	7.09e-06	0.820727	0.295	NOT	1781.99	6.65e-09	0.772333	0.3	NOT	0.847191	0.171	NOT	0.626986	0.0497	NOT	1.29202	0.45	NOT	1.01611	0.323	NOT
TU0148	1	-	3121169	3122521			AT1G09640.1		1026.92	1.97e-23	886.766	4.52e-17	802.991	8.36e-15	910.083	3.07e-15	1.12838	0.349	NOT	895.348	6e-19	0.990415	0.413	NOT	847.307	1.18e-14	0.947698	0.281	NOT	0.86352	0.352	NOT	0.781941	0.0548	NOT	0.983809	0.419	NOT	0.931022	0.27	NOT
TU0149	1	-	3123974	3124412			AT1G09645.1		99.6952	0.0248812	545.785	9.24e-10	270.073	5.83e-06	374.962	2.92e-05	0.265881	0.0262	NOT	252.217	0.00434409	2.16395	0.0246	NOT	270.357	0.00557308	0.99895	0.209	NOT	5.47454	0.000766	DIFF	2.70899	0.452	NOT	0.672647	0.14	NOT	0.721025	0.177	NOT
TU0150	1	+	3147895	3148977			AT1G09730.1		308.281	1.55e-05	337.351	2.39e-06	367.646	3.05e-09	471.209	1.49e-12	0.654234	0.0229	NOT	351.12	6.88e-08	0.960785	0.329	NOT	323.602	6.73e-05	1.13611	0.26	NOT	1.0943	0.399	NOT	1.19257	0.179	NOT	0.745147	0.0732	NOT	0.686748	0.0374	DIFF
TU0151	1	-	3162453	3165170			AT1G09770.1		1999.38	2.72e-15	1803.56	1.58e-14	1942.82	8.26e-17	2669.79	4.3e-18	0.74889	0.18	NOT	1597.24	4.44e-15	1.12917	0.441	NOT	1980.51	2.55e-17	0.98097	0.465	NOT	0.90206	0.292	NOT	0.971711	0.465	NOT	0.598264	0.0551	NOT	0.741822	0.144	NOT
TU0152	1	-	3218981	3219939			AT1G09900.1		449.986	9.45e-12	285.251	1.36e-06	379.034	6.16e-07	608.434	1.02e-11	0.739581	0.483	NOT	534.623	7.08e-08	0.533555	0.433	NOT	546.31	6.45e-09	0.693808	0.122	NOT	0.633911	0.0368	NOT	0.842324	0.0368	NOT	0.878687	0.0939	NOT	0.897895	0.362	NOT
TU0153	1	+	3224423	3224987			AT1G09910.1,AT1G09920.1		864.435	9.33e-08	828.465	2.24e-09	834.143	3.23e-08	1033.94	3.28e-09	0.836059	0.303	NOT	750.079	5.4e-06	1.1045	0.159	NOT	854.255	2.15e-08	0.976457	0.453	NOT	0.958389	0.491	NOT	0.964957	0.425	NOT	0.725457	0.0884	NOT	0.826213	0.366	NOT
TU0154	1	+	3240793	3241775			AT1G09950.1		344.338	6.61e-05	439.6	1.75e-08	537.637	2.34e-08	307.902	3.79e-05	1.11834	0.482	NOT	629.383	7.07e-13	0.698462	0.356	NOT	490.763	2.35e-08	1.09551	0.493	NOT	1.27665	0.0865	NOT	1.56136	0.25	NOT	2.0441	0.0518	NOT	1.59389	0.255	NOT
TU0155	1	-	3281497	3283430			AT1G10050.1		364.193	2.25e-10	389.255	6.64e-10	382.2	3.05e-09	486.311	3.05e-09	0.748889	0.162	NOT	419.654	9.96e-09	0.927562	0.49	NOT	363.571	7.34e-07	1.05124	0.426	NOT	1.06882	0.456	NOT	1.04944	0.415	NOT	0.862933	0.16	NOT	0.74761	0.172	NOT
TU0156	1	-	3337499	3338122					354.756	1.3e-09	1017.48	7.46e-16	558.673	1e-16	424.673	1.97e-11	0.835363	0.347	NOT	2954.33	5.2e-28	0.344403	0.00758	NOT	1509.59	1.83e-19	0.370083	0.0245	NOT	2.86811	0.0328	NOT	1.57481	0.133	NOT	6.95672	1.07e-05	DIFF	3.55471	0.00409	DIFF
TU0157	1	+	3383594	3384912			AT1G10310.1,AT1G10320.1		794.695	3.1e-14	606.724	1.47e-10	687.954	2.8e-15	687.755	1.37e-09	1.15549	0.232	NOT	579.23	7.5e-10	1.04747	0.369	NOT	521.743	7.97e-07	1.31857	0.348	NOT	0.763468	0.144	NOT	0.865683	0.224	NOT	0.842204	0.263	NOT	0.758618	0.347	NOT
TU0158	1	+	3387588	3388730			AT1G10320.1		5197.31	3.37e-11	3270.81	1.38e-15	4548.25	8.47e-14	3983.03	2.45e-14	1.30486	0.299	NOT	2575.71	1.22e-08	1.26987	0.167	NOT	3674.23	4.25e-12	1.23788	0.471	NOT	0.629327	0.191	NOT	0.875116	0.257	NOT	0.646671	0.113	NOT	0.922471	0.47	NOT
TU0159	1	+	3428109	3429049			AT1G10430.1		513.165	1.07e-11	380.636	1.35e-07	347.852	6.48e-06	541.019	3.5e-16	0.948516	0.097	NOT	473.778	6.15e-06	0.803406	0.112	NOT	328.824	9.33e-05	1.05787	0.444	NOT	0.741742	0.173	NOT	0.677856	0.136	NOT	0.875714	0.127	NOT	0.607786	0.0122	DIFF
TU0160	1	+	3502253	3502990			AT1G10590.1		874.077	1.17e-11	717.07	4.21e-12	562.266	9.1e-10	1126.01	1.15e-13	0.77626	0.185	NOT	985.472	1.74e-10	0.727641	0.392	NOT	921.665	1.01e-09	0.610055	0.157	NOT	0.820374	0.34	NOT	0.643268	0.0592	NOT	0.875189	0.187	NOT	0.818523	0.083	NOT
TU0161	1	-	3517407	3517843	AT1G10640	AT1G10640			1842.76	7.48e-18	400.546	0.0287083	395.22	2.17e-05	1839.94	3.07e-15	1.00153	0.345	NOT	400.984	0.00077799	0.998908	0.282	NOT	264.878	0.0136752	1.49208	0.177	NOT	0.217362	1.24e-06	DIFF	0.214472	5.84e-06	DIFF	0.217933	1.37e-07	DIFF	0.14396	7.03e-08	DIFF
TU0162	1	-	3537328	3538120			AT1G10670.1		588.015	2.39e-09	476.663	1.16e-06	298.114	0.00104402	511.29	2.56e-09	1.15006	0.458	NOT	390.746	9.36e-06	1.21988	0.394	NOT	312.478	0.000375981	0.954032	0.108	NOT	0.810631	0.166	NOT	0.506984	0.00605	DIFF	0.764236	0.14	NOT	0.611156	0.0573	DIFF
TU0163	1	+	3545033	3545431			AT1G10682.1		3465.74	5.22e-12	1600.3	1.79e-09	1112.41	1.67e-07	3882.17	1.55e-12	0.892733	0.262	NOT	1746.83	4.86e-11	0.916117	0.225	NOT	1677.55	4.95e-09	0.663116	0.0767	NOT	0.461748	0.00937	DIFF	0.320973	0.00206	DIFF	0.449962	0.0178	DIFF	0.432117	0.00861	DIFF
TU0164	1	+	3577289	3578195			AT1G10750.1		470.882	0.000161199	781.683	4.42e-09	688.28	2.61e-06	755.056	1.09e-06	0.623639	0.216	NOT	459.114	5.03e-05	1.70259	0.34	NOT	487.598	5.65e-07	1.41157	0.289	NOT	1.66004	0.262	NOT	1.46168	0.135	NOT	0.608053	0.377	NOT	0.645777	0.422	NOT
TU0165	1	+	3648019	3648933			AT1G10930.1		275.578	1.4e-07	417.13	6.14e-09	454.19	1.1e-07	242.794	0.0198121	1.13503	0.247	NOT	256.142	1.15e-05	1.62851	0.0106	NOT	375.501	1.1e-05	1.20956	0.157	NOT	1.51365	0.12	NOT	1.64814	0.156	NOT	1.05498	0.346	NOT	1.54658	0.187	NOT
TU0166	1	-	3664010	3664999			AT1G10960.1		1122.1	1.64e-19	1597.31	4.84e-17	1214.5	1.17e-09	940.738	2.77e-11	1.19279	0.439	NOT	1288.01	7.07e-17	1.24014	0.27	NOT	907.55	1.31e-09	1.33822	0.409	NOT	1.4235	0.33	NOT	1.08235	0.248	NOT	1.36915	0.494	NOT	0.964721	0.268	NOT
TU0167	1	+	3760024	3761127			AT1G11220.1		714.618	6.72e-13	806.141	8.77e-14	817.429	1.61e-12	516.217	1.35e-09	1.38434	0.348	NOT	484.633	3.3e-08	1.66341	0.274	NOT	645.219	8.08e-10	1.2669	0.26	NOT	1.12807	0.291	NOT	1.14387	0.319	NOT	0.938816	0.193	NOT	1.2499	0.445	NOT
TU0168	1	+	3766938	3767228			AT1G11240.1		526.669	1.58e-10	898.014	1.63e-07	695.761	8.69e-08	658.218	1.74e-07	0.800144	0.347	NOT	485.068	4.35e-07	1.85132	0.258	NOT	506.033	1.77e-05	1.37493	0.266	NOT	1.70508	0.43	NOT	1.32106	0.41	NOT	0.736941	0.324	NOT	0.768792	0.281	NOT
TU0169	1	+	3800908	3801314			AT1G11310.1		804.154	4.66e-14	356.079	1.36e-07	477.685	4.9e-09	903.858	1.11e-16	0.889691	0.23	NOT	549.494	6.15e-06	0.648013	0.137	NOT	308.997	3.73e-07	1.54592	0.461	NOT	0.4428	0.0636	NOT	0.594022	0.116	NOT	0.607943	0.0645	NOT	0.341865	0.00748	DIFF
TU0170	1	-	3888674	3890471			AT1G11580.1		337.096	5.71e-06	278.416	0.000789627	253.393	2.12e-08	448.933	1.23e-11	0.750883	0.155	NOT	400.124	1.53e-09	0.695824	0.107	NOT	276.925	4.28e-07	0.915024	0.202	NOT	0.825925	0.114	NOT	0.751694	0.0771	NOT	0.891278	0.18	NOT	0.616852	0.0506	DIFF
TU0171	1	-	3901698	3903623			AT1G11600.1		293.779	1.99e-05	285.399	1.02e-05	270.647	2.31e-06	470.083	6.03e-10	0.624951	0.0674	NOT	304.239	7.9e-06	0.938075	0.453	NOT	410.165	3.81e-05	0.659849	0.456	NOT	0.971475	0.292	NOT	0.921261	0.492	NOT	0.647203	0.0343	DIFF	0.872537	0.0797	NOT
TU0172	1	-	3916864	3918117			AT1G11650.1		300.529	0.00064216	217.955	0.0220552	235.76	0.00136422	483.14	5.41e-09	0.622033	0.0309	NOT	364.684	9.54e-06	0.597654	0.114	NOT	256.871	5.22e-05	0.917815	0.0854	NOT	0.725238	0.39	NOT	0.784483	0.0964	NOT	0.754821	0.072	NOT	0.53167	0.021	DIFF
TU0173	1	+	3920699	3921020	AT1G11660	AT1G11660			235.447	1.44e-09	5295.35	2.7e-38	247.518	2.98e-13	257.924	3.08e-10	0.912854	0.43	NOT	6238.92	2.45e-41	0.848761	0.447	NOT	1781.13	3.83e-25	0.138967	0.00161	NOT	22.4906	9.69e-06	DIFF	1.05127	0.289	NOT	24.189	1.71e-06	DIFF	6.90564	0.000171	DIFF
TU0174	1	-	3921179	3924479			AT1G11660.1		176.15	0.0172239	370.356	1.24e-08	179.06	0.00357445	263.432	1.27e-05	0.668674	0.057	NOT	487.231	4.51e-11	0.760124	0.0329	NOT	242.627	3.82e-05	0.738005	0.0121	NOT	2.1025	0.00096	DIFF	1.01652	0.344	NOT	1.84955	0.000373	DIFF	0.921023	0.416	NOT
TU0175	1	-	3945854	3946468			AT1G11700.1		1007.62	4.64e-17	1364.92	2.38e-10	1208.68	1.03e-11	900.026	3.52e-10	1.11955	0.305	NOT	765.275	1.33e-08	1.78357	0.303	NOT	818.739	1.54e-08	1.47627	0.261	NOT	1.3546	0.272	NOT	1.19954	0.279	NOT	0.850281	0.323	NOT	0.909684	0.231	NOT
TU0176	1	-	3952513	3953484			AT1G11720.1		615.99	9.45e-12	570.573	1.83e-09	728.942	2.92e-09	705.28	8.29e-08	0.873398	0.414	NOT	363.84	0.100727	1.5682	0.0955	NOT	558.608	3.4e-06	1.30493	0.187	NOT	0.92627	0.242	NOT	1.18337	0.367	NOT	0.51588	0.0417	DIFF	0.792037	0.136	NOT
TU0177	1	-	3997041	3997838			AT1G11840.1		1397.98	3.32e-11	1431.4	2.28e-16	1349.75	3.13e-14	1830.33	1.7e-17	0.763786	0.274	NOT	1641.18	1.61e-15	0.872177	0.442	NOT	1144.81	6.72e-18	1.17902	0.332	NOT	1.02391	0.426	NOT	0.9655	0.438	NOT	0.896658	0.354	NOT	0.625466	0.41	NOT
TU0178	1	-	4001838	4004315			AT1G11860.1		1868.67	4.23e-22	1856.49	2.93e-27	1419.24	6.14e-21	2139.23	3.54e-22	0.873525	0.27	NOT	1963.63	9.04e-21	0.945438	0.375	NOT	1240.02	5.09e-20	1.14453	0.466	NOT	0.993482	0.33	NOT	0.759492	0.0907	NOT	0.917914	0.246	NOT	0.579657	0.0268	DIFF
TU0179	1	+	4016793	4017830			AT1G11910.1		2730.27	4.42e-19	2764.89	4.77e-11	1310.44	8.57e-10	2613.89	5.2e-16	1.04452	0.329	NOT	2825.78	2e-09	0.978452	0.451	NOT	1961.15	2.81e-14	0.6682	0.11	NOT	1.01268	0.438	NOT	0.479967	0.0572	NOT	1.08106	0.268	NOT	0.75028	0.139	NOT
TU0180	1	-	4061397	4062114					3352.43	2.62e-17	2036.9	1.56e-11	1244.06	7.11e-11	54444.9	7.1e-37	0.0615747	1.94e-07	DIFF	36883.4	1.8e-32	0.0552254	3.31e-06	DIFF	36107.2	2.55e-29	0.0344546	3.36e-07	DIFF	0.607589	0.0305	NOT	0.371092	0.0102	DIFF	0.677445	0.0485	NOT	0.663188	0.0372	DIFF
TU0181	1	+	4062746	4063369			AT1G12020.1		728.105	4.53e-09	665.337	2.22e-08	690.916	1.02e-10	430.64	6.82e-07	1.69075	0.113	NOT	801.738	2.41e-11	0.829868	0.392	NOT	687.628	9.34e-06	1.00478	0.263	NOT	0.913793	0.376	NOT	0.948924	0.485	NOT	1.86174	0.0968	NOT	1.59676	0.287	NOT
TU0182	1	+	4064724	4066364			AT1G12030.1		635.087	2.06e-06	1195.51	6.41e-09	589.334	4.55e-07	517.523	7.99e-05	1.22717	0.104	NOT	786.645	2.56e-06	1.51976	0.127	NOT	566.005	2.24e-05	1.04122	0.498	NOT	1.88244	0.312	NOT	0.927958	0.144	NOT	1.52002	0.332	NOT	1.09368	0.413	NOT
TU0183	1	-	4076268	4076970			AT1G12060.1		681.34	1.47e-06	1197.49	4.06e-20	931.885	2.39e-13	665.793	0.000613079	1.02335	0.167	NOT	2793.52	2.13e-27	0.428667	0.00185	DIFF	1022.41	3.6e-14	0.911459	0.458	NOT	1.75755	0.03	NOT	1.36772	0.0952	NOT	4.19578	9.4e-07	DIFF	1.53563	0.00792	DIFF
TU0184	1	-	4084420	4085515			AT1G12080.1		1035.45	4.62e-14	772.157	2.46e-09	727.816	1.01e-08	1491.96	1.2e-12	0.69402	0.134	NOT	1189.02	2.03e-16	0.649406	0.0418	NOT	1079.78	9.58e-19	0.674041	0.0687	NOT	0.745721	0.267	NOT	0.702898	0.184	NOT	0.796952	0.361	NOT	0.723733	0.251	NOT
TU0185	1	+	4089991	4090592			AT1G12090.1		510.36	6.07e-07	464.483	3.84e-06	576.284	1.56e-09	437.061	0.000303669	1.16771	0.235	NOT	504.163	0.000255965	0.921295	0.42	NOT	420.912	1.14e-05	1.36913	0.2	NOT	0.910109	0.212	NOT	1.12917	0.429	NOT	1.15353	0.42	NOT	0.963051	0.471	NOT
TU0186	1	-	4106114	4106692			AT1G12110.1		414.613	7.95e-05	1322.89	4.9e-08	1054.63	1.8e-08	998.348	7.09e-09	0.415299	0.0119	NOT	1337.38	3.6e-09	0.989165	0.302	NOT	861.545	8.81e-08	1.22411	0.293	NOT	3.19066	0.0865	NOT	2.54365	0.0874	NOT	1.33959	0.411	NOT	0.862971	0.103	NOT
TU0187	1	+	4114933	4116291			AT1G12120.1		551.899	1.01e-15	363.033	7.66e-12	419.711	5.95e-10	672.385	1.31e-18	0.820808	0.194	NOT	294.418	8.07e-09	1.23305	0.362	NOT	392.304	1.24e-08	1.06986	0.39	NOT	0.657789	0.0224	NOT	0.760485	0.0907	NOT	0.437871	0.000192	DIFF	0.583451	0.00293	DIFF
TU0188	1	-	4160727	4161509			AT1G12250.1		613.958	1.79e-09	504.978	5.39e-09	213.867	0.000210105	385.197	1.57e-05	1.59388	0.176	NOT	430.714	1.88e-05	1.17242	0.294	NOT	184.603	0.0179968	1.15852	0.2	NOT	0.822496	0.462	NOT	0.348341	0.0158	DIFF	1.11817	0.325	NOT	0.479243	0.174	NOT
TU0189	1	+	4187546	4188015			AT1G12310.1		710.109	9.37e-06	383.468	3.83e-06	444.661	6.59e-05	765.113	2.47e-09	0.92811	0.232	NOT	596.236	0.000468156	0.643148	0.334	NOT	235.533	0.00299955	1.88789	0.185	NOT	0.540013	0.188	NOT	0.626187	0.244	NOT	0.779278	0.0815	NOT	0.307841	0.0132	DIFF
TU0190	1	-	4194624	4196440			AT1G12330.1		420.236	1.47e-08	383.13	2.46e-09	423.421	7e-08	414.49	4.86e-11	1.01386	0.234	NOT	450.174	1.36e-08	0.851071	0.344	NOT	453.774	6.37e-08	0.93311	0.359	NOT	0.911702	0.24	NOT	1.00758	0.289	NOT	1.08609	0.151	NOT	1.09478	0.293	NOT
TU0191	1	-	4206017	4206306			AT1G12360.1		592.736	3.53e-09	378.706	9.84e-06	449.826	0.000463922	625.998	3.03e-07	0.946866	0.418	NOT	660.821	2.8e-08	0.573084	0.137	NOT	403.959	0.000178909	1.11354	0.24	NOT	0.638912	0.0452	NOT	0.758898	0.0741	NOT	1.05563	0.363	NOT	0.645304	0.0595	DIFF
TU0192	1	+	4226470	4226986			AT1G12420.1		1299.46	0.000166303	699.89	5.56e-05	817.904	0.000115056	608.799	2.42e-06	2.13446	0.477	NOT	650.491	3.04e-09	1.07594	0.248	NOT	930.772	8.43e-10	0.878737	0.317	NOT	0.538601	0.216	NOT	0.629418	0.26	NOT	1.06848	0.487	NOT	1.52887	0.109	NOT
TU0193	1	+	4241739	4242318			AT1G12440.1		992.379	6.35e-07	1146.36	2.71e-13	866.477	4.54e-07	1278.84	8.01e-12	0.775999	0.351	NOT	915.271	4.38e-06	1.25248	0.358	NOT	779.619	8.51e-08	1.11141	0.252	NOT	1.15516	0.466	NOT	0.873131	0.466	NOT	0.715704	0.149	NOT	0.60963	0.133	NOT
TU0194	1	-	4285357	4285706			AT1G12580.1		1252.78	3.03e-09	887.966	2.15e-13	543.37	5.23e-06	1165.43	7.4e-08	1.07495	0.47	NOT	1335.28	2.19e-07	0.665004	0.406	NOT	711.885	0.000172498	0.763283	0.338	NOT	0.708796	0.361	NOT	0.433731	0.0891	NOT	1.14574	0.488	NOT	0.610835	0.143	NOT
TU0195	1	+	4290295	4291071			AT1G12610.1		580.48	6.12e-07	656.298	1.81e-06	301.677	0.000133499	606.703	5.84e-06	0.956778	0.474	NOT	244.504	0.000361454	2.6842	0.0914	NOT	498.138	9.82e-13	0.605609	0.07	NOT	1.13061	0.46	NOT	0.519703	0.136	NOT	0.403004	0.115	NOT	0.821057	0.354	NOT
TU0196	1	-	4348468	4350571			AT1G12760.1		1620.6	3.63e-11	3269.78	2.6e-20	2630.8	1.91e-12	1892.13	9.84e-13	0.856495	0.466	NOT	2742.37	7.07e-17	1.19232	0.175	NOT	2294.46	1.65e-13	1.14659	0.409	NOT	2.01764	0.00743	DIFF	1.62335	0.213	NOT	1.44936	0.0583	NOT	1.21263	0.278	NOT
TU0197	1	+	4364137	4365211			AT1G12800.1		415.34	3.05e-09	453.609	7.21e-07	399.761	5.49e-05	375.866	1.83e-06	1.10502	0.105	NOT	318.882	0.000128576	1.4225	0.208	NOT	259.853	3.05e-09	1.53841	0.321	NOT	1.09214	0.199	NOT	0.962491	0.0952	NOT	0.848393	0.276	NOT	0.691345	0.327	NOT
TU0198	1	+	4374279	4375134			AT1G12830.1		817.799	5.71e-07	1024.68	9.69e-12	775.661	1.19e-08	818.127	8.12e-07	0.999599	0.273	NOT	1037.41	1.65e-15	0.987729	0.475	NOT	724.926	3.36e-12	1.06999	0.237	NOT	1.25297	0.0453	NOT	0.948474	0.474	NOT	1.26803	0.15	NOT	0.88608	0.415	NOT
TU0199	1	+	4392612	4398169			AT1G12900.1,AT1G12910.1,AT1G12920.1		452.83	1.51e-20	457.594	6.2e-17	382.41	6.09e-18	513.869	1.46e-19	0.881217	0.0593	NOT	392.217	1.24e-15	1.16669	0.175	NOT	406.167	1.44e-17	0.941509	0.337	NOT	1.01052	0.393	NOT	0.844489	0.12	NOT	0.763263	0.0032	DIFF	0.79041	0.00901	DIFF
TU0200	1	+	4440605	4444691			AT1G13020.1		469.943	9.74e-14	465.303	4.45e-13	399.417	5.67e-12	412.64	2.52e-11	1.13887	0.453	NOT	321.803	1.38e-07	1.44592	0.178	NOT	475.831	9.98e-11	0.839409	0.372	NOT	0.990126	0.427	NOT	0.849926	0.268	NOT	0.779864	0.185	NOT	1.15314	0.343	NOT
TU0201	1	-	4459077	4468867			AT1G13110.1		434.637	4.18e-12	390.035	1.59e-11	358.43	4.99e-06	491.543	2.08e-13	0.88423	0.171	NOT	325.811	2.22e-08	1.19712	0.0454	NOT	300.077	2.64e-05	1.19446	0.198	NOT	0.897381	0.49	NOT	0.824665	0.257	NOT	0.662833	0.00562	DIFF	0.61048	0.00689	DIFF
TU0202	1	+	4478273	4483712			AT1G13140.1,AT1G13150.1		280.219	3.83e-09	328.736	2.67e-14	310.988	7.16e-12	300.384	9.75e-12	0.932869	0.219	NOT	267.308	4.44e-08	1.2298	0.0572	NOT	262.1	2.35e-13	1.18652	0.387	NOT	1.17314	0.41	NOT	1.1098	0.447	NOT	0.889888	0.0162	DIFF	0.87255	0.178	NOT
TU0203	1	-	4487110	4488383			AT1G13160.1		660.494	2.32e-10	873.076	2.98e-12	723.179	6.38e-10	671.914	9.71e-12	0.983004	0.377	NOT	477.815	6.21e-10	1.82723	0.109	NOT	669.456	2.93e-12	1.08025	0.129	NOT	1.32185	0.346	NOT	1.09491	0.0955	NOT	0.711125	0.277	NOT	0.996342	0.429	NOT
TU0204	1	+	4488851	4489444			AT1G13170.1		1148.15	6.62e-11	576.242	3.43e-05	830.775	3.85e-12	1266.5	3.38e-09	0.906553	0.49	NOT	636.105	3.9e-05	0.905891	0.496	NOT	905.931	3.43e-05	0.91704	0.279	NOT	0.501887	0.0606	NOT	0.723577	0.234	NOT	0.502254	0.0388	DIFF	0.715303	0.134	NOT
TU0205	1	-	4500248	4501385			AT1G13190.1		450.939	4.18e-12	504.688	4.45e-12	453.472	6.13e-09	393.017	5e-07	1.14738	0.494	NOT	557.922	1.68e-08	0.904585	0.48	NOT	409.091	5.21e-11	1.10849	0.404	NOT	1.11919	0.237	NOT	1.00562	0.438	NOT	1.41959	0.291	NOT	1.0409	0.337	NOT
TU0206	1	-	4540673	4543415			AT1G13260.1		883.533	1.23e-09	1035.7	1.1e-08	870.307	2.42e-07	1273.67	4.25e-11	0.693691	0.298	NOT	847.567	5.37e-10	1.22197	0.499	NOT	624.271	1.23e-08	1.39412	0.418	NOT	1.17223	0.468	NOT	0.985031	0.164	NOT	0.665453	0.221	NOT	0.490136	0.0688	NOT
TU0207	1	+	4576306	4578235			AT1G13360.1		805.158	2.13e-10	610.23	3.46e-11	694.885	4.65e-09	703.484	1.13e-09	1.14453	0.493	NOT	434.295	1.57e-05	1.4051	0.354	NOT	698.283	1.84e-15	0.995134	0.324	NOT	0.757901	0.118	NOT	0.863042	0.209	NOT	0.617349	0.0678	NOT	0.992607	0.387	NOT
TU0208	1	+	4592812	4593893			AT1G13390.1		410.823	2.08e-06	401.747	1.13e-05	408.691	7.77e-06	269.228	0.00228128	1.52593	0.376	NOT	663.898	4.86e-11	0.605134	0.1	NOT	358.495	2.51e-05	1.14002	0.421	NOT	0.977908	0.15	NOT	0.99481	0.251	NOT	2.46593	0.00605	DIFF	1.33157	0.21	NOT
TU0209	1	+	4608311	4609195			AT1G13440.1		786.426	5.09e-10	777.86	1.69e-14	911.103	2.8e-12	1129.1	2.54e-16	0.696507	0.369	NOT	540.786	1.23e-10	1.43839	0.485	NOT	772.383	5.43e-07	1.1796	0.165	NOT	0.989108	0.226	NOT	1.15854	0.348	NOT	0.478953	0.159	NOT	0.68407	0.0761	NOT
TU0210	1	+	4627215	4627618					759.399	2.21e-15	552.257	0.000141459	796.719	1.13e-05	575.177	3.93e-07	1.32029	0.114	NOT	876.095	3.56e-08	0.630362	0.229	NOT	727.924	1.97e-05	1.09451	0.434	NOT	0.727229	0.315	NOT	1.04914	0.386	NOT	1.52317	0.0858	NOT	1.26557	0.16	NOT
TU0211	1	-	4662798	4663465			AT1G13609.1		6163.96	1.06e-32	594.57	6.41e-06	524.924	0.00432084	6837.72	2.42e-36	0.901464	0.161	NOT	298.272	0.00280482	1.99338	0.0872	NOT	415.784	0.00323608	1.26249	0.0832	NOT	0.0964591	1.13e-08	DIFF	0.0851602	4.35e-08	DIFF	0.0436216	1.61e-10	DIFF	0.0608074	1.55e-10	DIFF
TU0212	1	+	4677144	4681460			AT1G13640.1		462.425	1.71e-09	418.605	3.06e-09	417.675	3.66e-10	603.379	9.55e-11	0.766392	0.365	NOT	579.643	2.15e-15	0.722177	0.342	NOT	454.575	2.53e-09	0.918825	0.357	NOT	0.905239	0.395	NOT	0.903228	0.307	NOT	0.960662	0.426	NOT	0.753382	0.301	NOT
TU0213	1	-	4713551	4715198			AT1G13740.1		1876.81	4.77e-12	3411.67	6.2e-12	2805.38	1.3e-15	2574.94	3.67e-14	0.728875	0.31	NOT	1808.06	8.86e-16	1.88692	0.454	NOT	3320.71	1.68e-09	0.844813	0.401	NOT	1.8178	0.411	NOT	1.49476	0.31	NOT	0.702176	0.269	NOT	1.28963	0.434	NOT
TU0214	1	+	4753453	4754147			AT1G13900.1		449.572	1.46e-08	439.353	2.89e-06	343.625	0.00064952	559.481	1.39e-07	0.803552	0.142	NOT	590.977	1.82e-10	0.743435	0.276	NOT	375.013	0.000312432	0.916302	0.472	NOT	0.977269	0.316	NOT	0.764338	0.421	NOT	1.0563	0.441	NOT	0.670287	0.12	NOT
TU0215	1	-	4758289	4761548			AT1G13930.1		2661.49	1.11e-10	1897.73	7.65e-10	908.959	1.01e-07	3611.22	1e-11	0.737006	0.238	NOT	2873.82	1.56e-12	0.660351	0.272	NOT	1400.15	1.31e-15	0.649187	0.175	NOT	0.713033	0.254	NOT	0.341523	0.0173	DIFF	0.795803	0.24	NOT	0.387722	0.02	DIFF
TU0216	1	-	4803900	4804989			AT1G14020.1		518.87	2.88e-12	390.2	7.3e-06	206.851	0.0027713	320.915	3.73e-07	1.61685	0.0151	NOT	318.372	0.000248064	1.22561	0.499	NOT	409.201	5.72e-10	0.5055	0.00921	NOT	0.752019	0.0229	NOT	0.398657	0.00166	DIFF	0.992076	0.493	NOT	1.27511	0.076	NOT
TU0217	1	-	4818496	4820398			AT1G14070.1		682.404	2.26e-15	420.003	9.85e-07	463.588	1.09e-08	558.31	5.98e-11	1.22227	0.24	NOT	328.511	3.53e-06	1.27851	0.366	NOT	556.228	2.38e-11	0.83345	0.463	NOT	0.615476	0.0124	DIFF	0.679345	0.0706	NOT	0.588403	0.0279	DIFF	0.996271	0.189	NOT
TU0218	1	+	4854462	4854980			AT1G14200.1		522.508	8.31e-07	712.742	5.8e-09	677.662	0.000135728	732.746	6.72e-11	0.713082	0.273	NOT	609.036	2.33e-05	1.17028	0.27	NOT	1056.38	7.67e-10	0.641495	0.0962	NOT	1.36408	0.379	NOT	1.29694	0.4	NOT	0.831169	0.158	NOT	1.44167	0.149	NOT
TU0219	1	+	4856811	4857426			AT1G14210.1		1439.51	3.14e-18	2038.23	4.1e-18	2589.83	4.52e-15	1279.58	2.59e-22	1.12499	0.145	NOT	2368.64	1.12e-18	0.860506	0.29	NOT	2456.55	5.5e-26	1.05425	0.266	NOT	1.41592	0.176	NOT	1.79911	0.117	NOT	1.85111	0.00835	DIFF	1.91981	0.000767	DIFF
TU0220	1	-	4870784	4871225			AT1G14250.1		3724.06	5.56e-08	3689.79	3.9e-12	2045.05	1.24e-12	4728.82	2.04e-10	0.787524	0.149	NOT	3836.26	3.25e-12	0.96182	0.226	NOT	2752.27	1.79e-09	0.743041	0.302	NOT	0.990798	0.136	NOT	0.549145	0.488	NOT	0.811251	0.282	NOT	0.58202	0.193	NOT
TU0221	1	-	4877654	4878875			AT1G14280.1		821.043	3.71e-18	650.439	2.44e-19	500.33	3.69e-10	663.744	1.88e-14	1.23699	0.146	NOT	706.104	5.28e-14	0.921166	0.246	NOT	530.582	1.34e-11	0.942983	0.488	NOT	0.792211	0.254	NOT	0.609383	0.0103	DIFF	1.06382	0.304	NOT	0.799377	0.0838	NOT
TU0222	1	+	4880106	4880871			AT1G14290.1		586.024	3.19e-11	358.886	1.33e-05	295.423	0.000449037	454.801	3.16e-07	1.28853	0.161	NOT	405.651	1.32e-07	0.884716	0.248	NOT	299.801	0.000160121	0.985397	0.204	NOT	0.612408	0.0404	NOT	0.504114	0.00189	DIFF	0.891931	0.454	NOT	0.659192	0.0541	DIFF
TU0223	1	-	4898782	4899746			AT1G14340.1,AT1G14345.1		546.837	5.91e-13	528.783	8.39e-08	635.856	7.84e-13	615.032	2.44e-07	0.88912	0.361	NOT	332.497	5.1e-06	1.59034	0.129	NOT	394.196	3.06e-09	1.61305	0.0593	NOT	0.966985	0.293	NOT	1.16279	0.338	NOT	0.540617	0.124	NOT	0.640936	0.275	NOT
TU0224	1	+	4918230	4919744			AT1G14380.1		507.565	2.41e-13	289.764	7.36e-10	329.951	6.23e-06	395.161	6.79e-10	1.28445	0.117	NOT	235.405	3.73e-07	1.23092	0.243	NOT	348.708	5.51e-05	0.94621	0.429	NOT	0.57089	0.0237	NOT	0.650066	0.0253	DIFF	0.595719	0.0863	NOT	0.882445	0.287	NOT
TU0225	1	+	4927119	4927836			AT1G14400.1		2368.75	7.91e-15	2413.42	6.28e-18	1706.89	4.73e-08	2279.54	1.11e-11	1.03914	0.438	NOT	2180.83	1.27e-17	1.10665	0.392	NOT	2152.14	1.14e-13	0.793113	0.11	NOT	1.01886	0.479	NOT	0.720587	0.176	NOT	0.956697	0.315	NOT	0.944112	0.337	NOT
TU0226	1	-	4934518	4935993			AT1G14430.1		475.452	1.42e-08	508.089	4.46e-11	516.381	7.05e-17	426.584	5.39e-07	1.11456	0.492	NOT	524.399	3.38e-09	0.968898	0.44	NOT	418.387	1.59e-06	1.23422	0.206	NOT	1.06864	0.404	NOT	1.08608	0.196	NOT	1.2293	0.298	NOT	0.980785	0.494	NOT
TU0227	1	+	4939068	4940110			AT1G14440.1		979.64	3.13e-12	678.721	3.69e-09	645.239	1.99e-07	1074.98	1.59e-12	0.91131	0.333	NOT	663.99	5.18e-09	1.02219	0.333	NOT	446.573	1.29e-06	1.44487	0.294	NOT	0.692827	0.218	NOT	0.658649	0.244	NOT	0.617677	0.0443	DIFF	0.415424	0.0372	DIFF
TU0228	1	+	4961977	4962672			AT1G14510.1		1350.11	1.75e-13	1050.76	2.25e-10	1211.05	3.53e-17	1487.32	1.66e-09	0.907747	0.217	NOT	921.719	1.73e-13	1.14	0.336	NOT	959.54	8.8e-12	1.26212	0.146	NOT	0.778277	0.222	NOT	0.897001	0.484	NOT	0.619718	0.0143	DIFF	0.645147	0.00935	DIFF
TU0229	1	+	5008437	5010030			AT1G14610.1		499.813	2.1e-06	348.609	9.49e-05	313.482	0.000446196	524.601	8.2e-12	0.952749	0.438	NOT	449.805	4.15e-13	0.775023	0.238	NOT	251.044	2.45e-07	1.24871	0.324	NOT	0.697479	0.132	NOT	0.627199	0.0356	NOT	0.857423	0.276	NOT	0.478543	0.00951	DIFF
TU0230	1	+	5014752	5015301			AT1G14620.1		246.199	0.00252564	394.195	7.58e-05	633.929	3.85e-10	421.581	1.61e-06	0.58399	0.0311	NOT	395.73	3.25e-10	0.996121	0.383	NOT	375.339	1.66e-05	1.68895	0.103	NOT	1.60112	0.0802	NOT	2.57486	0.0113	DIFF	0.938681	0.415	NOT	0.890313	0.374	NOT
TU0231	1	-	5027621	5031745			AT1G14650.1		289.765	2.48e-07	301.916	8.76e-11	227.499	9.84e-12	295.712	1.94e-08	0.979889	0.443	NOT	273.585	4.53e-10	1.10355	0.143	NOT	206.789	1.59e-06	1.10015	0.453	NOT	1.04193	0.385	NOT	0.785116	0.0805	NOT	0.925174	0.307	NOT	0.699292	0.0974	NOT
TU0232	1	-	5042925	5044464			AT1G14685.1		653.269	3.84e-16	786.661	2.31e-16	423.486	4.81e-08	721.921	4.52e-15	0.904904	0.408	NOT	813.443	4.72e-20	0.967076	0.369	NOT	466.904	2.93e-09	0.907009	0.461	NOT	1.20419	0.307	NOT	0.648257	0.00657	DIFF	1.12678	0.366	NOT	0.646752	0.0247	DIFF
TU0233	1	+	5053168	5053884			AT1G14690.1		497.377	2.89e-11	263.518	7.93e-05	280.799	0.00113892	414.403	5.55e-06	1.20023	0.208	NOT	343.321	0.000281783	0.767556	0.299	NOT	237.697	0.000430905	1.18133	0.316	NOT	0.529815	0.122	NOT	0.56456	0.0973	NOT	0.828471	0.241	NOT	0.573589	0.171	NOT
TU0234	1	+	5075353	5076194			AT1G14740.1		1668.16	9.74e-14	1838.69	4.48e-20	1655.79	5.42e-12	2092.92	1.82e-19	0.797049	0.0943	NOT	1641	1.18e-15	1.12047	0.409	NOT	1735.4	1.01e-12	0.954126	0.402	NOT	1.10223	0.27	NOT	0.992585	0.316	NOT	0.784072	0.195	NOT	0.829176	0.129	NOT
TU0235	1	-	5098859	5099740			AT1G14800.1		3992.83	5.83e-08	4309.72	4.26e-09	7998.75	2.17e-10	3683.37	6.41e-09	1.08402	0.379	NOT	3766.1	1.06e-08	1.14435	0.314	NOT	6548.51	3.37e-10	1.22146	0.201	NOT	1.07936	0.283	NOT	2.00328	0.0351	NOT	1.02246	0.379	NOT	1.77786	0.0122	DIFF
TU0236	1	-	5123261	5123570					1085.57	0.000179455	1290.42	8.42e-09	1453.32	4.2e-11	1221.06	5.74e-07	0.889039	0.309	NOT	1062.27	5.4e-10	1.21478	0.492	NOT	1170.81	1.37e-10	1.24129	0.296	NOT	1.1887	0.418	NOT	1.33876	0.21	NOT	0.869957	0.247	NOT	0.958847	0.347	NOT
TU0237	1	-	5136829	5137717			AT1G14890.1		375.487	5.3e-14	336.186	2.01e-07	320.168	0.000874576	522.557	1.14e-09	0.718557	0.0582	NOT	427.349	3.05e-09	0.786678	0.142	NOT	267.14	0.00316226	1.1985	0.279	NOT	0.895333	0.326	NOT	0.852674	0.243	NOT	0.817804	0.125	NOT	0.511217	0.00278	DIFF
TU0238	1	+	5152334	5153028			AT1G14930.1		715.304	6.06e-09	658.08	1.76e-06	776.75	3.89e-08	799.229	4.85e-07	0.894993	0.494	NOT	1173.5	1.72e-09	0.560784	0.257	NOT	776.529	1.71e-09	1.00028	0.493	NOT	0.92	0.401	NOT	1.0859	0.387	NOT	1.46829	0.389	NOT	0.971598	0.325	NOT
TU0239	1	-	5168610	5169940			AT1G15000.1		349.897	9.61e-06	485.797	9.23e-08	569.569	2.01e-13	418.3	1.27e-06	0.836474	0.439	NOT	420.243	5.11e-08	1.15599	0.367	NOT	536.91	1.17e-12	1.06083	0.416	NOT	1.3884	0.277	NOT	1.62782	0.0284	DIFF	1.00464	0.457	NOT	1.28355	0.0743	NOT
TU0240	1	+	5228354	5228888			AT1G15200.1		3126.84	1.45e-09	2708.02	6.93e-11	2123.79	9.14e-11	2365.6	1.53e-15	1.3218	0.203	NOT	1574.37	2.82e-12	1.72007	0.46	NOT	2671.05	4.24e-14	0.795114	0.382	NOT	0.866056	0.35	NOT	0.679213	0.382	NOT	0.665527	0.367	NOT	1.12912	0.17	NOT
TU0241	1	+	5246857	5248725	AT1G15240	AT1G15240	AT1G15250.1		2107.04	1.66e-18	2171.7	1.48e-17	1814.9	3.29e-15	1723.23	5.47e-17	1.22273	0.252	NOT	1794.72	1.47e-20	1.21005	0.339	NOT	2001.28	3.06e-15	0.90687	0.136	NOT	1.03069	0.468	NOT	0.861351	0.141	NOT	1.04149	0.399	NOT	1.16135	0.253	NOT
TU0242	1	+	5275900	5276977			AT1G15340.1		1466.06	9.39e-28	1401.06	4.74e-28	1263.28	4.52e-29	1486.12	4.3e-21	0.986502	0.177	NOT	1279.14	2.87e-30	1.09531	0.444	NOT	1010.95	4.31e-30	1.2496	0.417	NOT	0.955663	0.191	NOT	0.861684	0.437	NOT	0.860725	0.424	NOT	0.680261	0.231	NOT
TU0243	1	-	5287974	5288510			AT1G15370.1		644.608	7.36e-07	344.447	0.0200112	416.344	2.01e-07	807.792	6.15e-09	0.797988	0.106	NOT	680.896	3.06e-09	0.505873	0.0933	NOT	584.64	1.7e-07	0.712137	0.0555	NOT	0.534351	0.395	NOT	0.645887	0.446	NOT	0.84291	0.43	NOT	0.723751	0.381	NOT
TU0244	1	+	5374872	5375874					1365.83	2.08e-09	464.448	0.000387567	573.433	7.45e-05	1859.87	9.6e-10	0.734369	0.286	NOT	1058.18	1.93e-09	0.438912	0.00389	NOT	715.461	1.39e-07	0.801487	0.041	NOT	0.340048	0.00508	DIFF	0.419842	0.00891	DIFF	0.568954	0.207	NOT	0.384683	0.101	NOT
TU0245	1	-	5398625	5402245			AT1G15690.1		575.84	3.81e-14	522.505	7.66e-13	399.433	2.33e-12	566.878	1.49e-11	1.01581	0.438	NOT	434.237	1.11e-14	1.20327	0.188	NOT	425.325	9.44e-14	0.939124	0.387	NOT	0.907379	0.0915	NOT	0.693653	0.00243	DIFF	0.766015	0.0101	DIFF	0.750294	0.000634	DIFF
TU0246	1	+	5415083	5415910			AT1G15750.1		431.774	3.82e-06	519.38	1.54e-08	358.116	2.44e-05	591.444	1.39e-10	0.730034	0.187	NOT	737.65	9.91e-13	0.704101	0.143	NOT	499.485	5.59e-08	0.71697	0.236	NOT	1.2029	0.201	NOT	0.829406	0.395	NOT	1.2472	0.168	NOT	0.844518	0.348	NOT
TU0247	1	-	5448562	5452603			AT1G15840.1		7676.46	1.6e-13	5995.69	1.82e-15	4504.03	3.37e-13	5807.65	3.46e-13	1.32178	0.492	NOT	3869.73	1.42e-14	1.54938	0.45	NOT	5319.07	5.75e-13	0.84677	0.369	NOT	0.781049	0.46	NOT	0.586733	0.36	NOT	0.666316	0.487	NOT	0.915873	0.494	NOT
TU0248	1	-	5472093	5472714			AT1G15930.1		705.155	1.48e-12	578.861	7.19e-07	568.369	6.55e-08	988.844	5.39e-10	0.71311	0.226	NOT	557.684	5.86e-07	1.03797	0.254	NOT	471.45	2.45e-07	1.20558	0.22	NOT	0.820899	0.151	NOT	0.80602	0.137	NOT	0.563976	0.144	NOT	0.476769	0.00594	DIFF
TU0249	1	-	5477102	5478014			AT1G15940.1		2573.67	1.39e-15	2814.28	4.84e-17	2654.4	1.48e-14	2187.09	8.18e-14	1.17676	0.17	NOT	2231.72	1.22e-23	1.26104	0.356	NOT	2864.69	5.53e-15	0.926592	0.459	NOT	1.09349	0.406	NOT	1.03137	0.381	NOT	1.02041	0.398	NOT	1.30982	0.366	NOT
TU0250	1	+	5488063	5488897			AT1G15970.1		461.758	4.43e-09	423.887	1.53e-09	443.977	4.28e-09	458.321	1.32e-16	1.0075	0.429	NOT	483.739	2.57e-09	0.876272	0.39	NOT	421.527	1.68e-08	1.05326	0.439	NOT	0.917985	0.405	NOT	0.961493	0.312	NOT	1.05546	0.493	NOT	0.91972	0.382	NOT
TU0251	1	-	5489310	5490202			AT1G15980.1		569.258	1.37e-09	337.682	8.27e-05	319.572	0.000514874	460.804	4.98e-06	1.23536	0.221	NOT	451.842	4.32e-08	0.747345	0.303	NOT	315.149	0.00057348	1.01403	0.344	NOT	0.593197	0.0247	NOT	0.561383	0.0149	DIFF	0.980551	0.247	NOT	0.683911	0.108	NOT
TU0252	1	+	5502268	5504327			AT1G16030.1		253.227	0.00023397	1711.25	1.12e-30	425.53	3.57e-10	271.417	3.79e-06	0.932981	0.246	NOT	2032.03	6.07e-39	0.842138	0.123	NOT	707.543	5.18e-21	0.601419	0.00797	NOT	6.75777	0	DIFF	1.68043	0.0302	DIFF	7.48675	0	DIFF	2.60685	0.000163	DIFF
TU0253	1	-	5505929	5506672			AT1G16040.1		344.847	0.00912644	545.471	0.000909247	222.355	0.00453846	304.565	4.42e-05	1.13226	0.441	NOT	825.665	6.77e-09	0.660644	0.0677	NOT	372.935	0.0164726	0.59623	0.127	NOT	1.58178	0.0719	NOT	0.644793	0.239	NOT	2.71096	0.00221	DIFF	1.22448	0.31	NOT
TU0254	1	+	5540476	5540891	AT1G16180	AT1G16180			588.097	1.59e-20	642.527	5.02e-21	744.601	1.9e-17	878.436	7.08e-21	0.669482	0.15	NOT	1499.2	4.18e-20	0.42858	0.182	NOT	1791.86	6.58e-23	0.415546	0.0587	NOT	1.09255	0.458	NOT	1.26612	0.362	NOT	1.70667	0.428	NOT	2.03983	0.0671	DIFF
TU0255	1	+	5547037	5547489			AT1G16210.1		2928.72	4.18e-11	2777.74	1.81e-09	3161.92	1.67e-10	2774.16	1.4e-09	1.05571	0.328	NOT	1495.32	7.5e-10	1.85762	0.337	NOT	2813.05	1.52e-08	1.12402	0.486	NOT	0.948448	0.345	NOT	1.07963	0.47	NOT	0.539017	0.378	NOT	1.01402	0.398	NOT
TU0256	1	-	5568330	5568401			AT1G16270.1		4523.51	0.000545348	11627.3	3.26e-08	7685.12	0.000776773	5211.04	2.75e-05	0.868063	0.329	NOT	18239.5	4.91e-09	0.637479	0.254	NOT	13486.8	1.57e-07	0.569825	0.1	NOT	2.57042	0.0351	NOT	1.69893	0.329	NOT	3.50017	0.0512	NOT	2.58812	0.0726	NOT
TU0257	1	-	5581617	5582008			AT1G16320.1		817.337	2.64e-09	863.07	8.82e-07	768.263	1.53e-05	853.675	5.09e-11	0.957433	0.393	NOT	955.801	4.02e-05	0.902981	0.474	NOT	469.647	1.94e-09	1.63583	0.234	NOT	1.05595	0.428	NOT	0.939959	0.205	NOT	1.11963	0.368	NOT	0.550147	0.0822	NOT
TU0258	1	-	5590841	5592677			AT1G16350.1		367.919	1.46e-08	318.909	0.00011194	317.39	5.03e-06	387.074	1.02e-11	0.950513	0.4	NOT	377.193	1.64e-14	0.84548	0.111	NOT	287.929	2.01e-07	1.10232	0.212	NOT	0.866791	0.0915	NOT	0.862663	0.0773	NOT	0.974473	0.376	NOT	0.74386	0.237	NOT
TU0259	1	-	5606752	5607377			AT1G16400.1		759.898	2.49e-11	210.848	0.0074674	438.732	1.09e-06	837.593	1.94e-13	0.90724	0.177	NOT	383.254	4.15e-05	0.550152	0.32	NOT	556.297	7.47e-08	0.788665	0.107	NOT	0.277469	0.00359	DIFF	0.577356	0.0685	NOT	0.457566	0.0019	DIFF	0.664161	0.123	NOT
TU0260	1	-	5608827	5611374			AT1G16410.1		1270.21	4.83e-23	487.78	2.46e-09	721.958	2.04e-15	1596.48	2.59e-22	0.795632	0.0766	NOT	830.45	4.8e-21	0.587368	0.0155	NOT	583.807	2.84e-10	1.23664	0.492	NOT	0.384015	1.45e-05	DIFF	0.568377	0.00155	DIFF	0.520176	0.000219	DIFF	0.365684	5.92e-06	DIFF
TU0261	1	-	5625740	5629096	AT1G16480	AT1G16480			301.511	4.52e-15	318.713	1.82e-10	385.758	1.1e-12	371.626	1.2e-12	0.811329	0.139	NOT	361.961	1.48e-18	0.880518	0.303	NOT	461.19	3.18e-12	0.836441	0.115	NOT	1.05705	0.224	NOT	1.27942	0.126	NOT	0.973993	0.116	NOT	1.24101	0.0933	NOT
TU0262	1	-	5638955	5639998			AT1G16500.1		495.507	6.82e-15	301.676	3.27e-05	393.237	5.68e-05	384.615	1.54e-08	1.28832	0.147	NOT	475.196	3.54e-05	0.634845	0.37	NOT	440.899	0.000205284	0.891898	0.132	NOT	0.608823	0.0296	NOT	0.793605	0.195	NOT	1.23551	0.407	NOT	1.14634	0.201	NOT
TU0263	1	+	5665511	5668149					1253.04	8.86e-20	923.317	1.88e-12	1013.19	1.08e-20	1405.38	1.15e-21	0.891602	0.417	NOT	772.163	5.55e-12	1.19575	0.309	NOT	1177.83	3.47e-22	0.860218	0.264	NOT	0.736862	0.0212	NOT	0.808586	0.081	NOT	0.549434	0.0041	DIFF	0.838086	0.169	NOT
TU0264	1	-	5685246	5686321	AT1G16635	AT1G16635			510.545	6.95e-05	2284.69	2.63e-09	17008.6	1.98e-19	373.594	7.31e-06	1.36658	0.261	NOT	1198.31	2.54e-09	1.90659	0.222	NOT	14948.1	5.41e-20	1.13784	0.446	NOT	4.475	0.00657	DIFF	33.3146	2.18e-07	DIFF	3.20752	0.00199	DIFF	40.0116	1.92e-08	DIFF
TU0265	1	+	5701915	5702772					714.482	6.47e-16	938.213	1.28e-17	822.993	2.79e-14	771.092	9.8e-17	0.926585	0.36	NOT	889.478	2.38e-15	1.05479	0.279	NOT	1046.63	1.74e-20	0.786327	0.219	NOT	1.31314	0.17	NOT	1.15187	0.344	NOT	1.15353	0.475	NOT	1.35733	0.246	NOT
TU0266	1	+	5764892	5765274			AT1G16850.1		302.437	0.00806887	1019.87	0.0107685	495.484	0.00264037	524.965	0.000775273	0.576109	0.0624	NOT	872.288	0.000732773	1.16919	0.311	NOT	2379.6	3.7e-09	0.208222	0.0656	NOT	3.37217	0.255	NOT	1.6383	0.0846	NOT	1.66161	0.46	NOT	4.53287	0.057	DIFF
TU0267	1	-	5838110	5840193			AT1G17070.1		290.652	8.83e-08	331.334	3.8e-09	309.825	1.98e-09	316.859	4.42e-08	0.917291	0.467	NOT	409.82	2.34e-09	0.808487	0.142	NOT	351.737	2.97e-09	0.880843	0.265	NOT	1.13997	0.472	NOT	1.06597	0.274	NOT	1.29338	0.104	NOT	1.11007	0.439	NOT
TU0268	1	+	5845776	5846359			AT1G17110.1		430.899	2.74e-16	911.41	1.36e-20	494.838	8.73e-17	427.895	2.23e-16	1.00702	0.326	NOT	568.172	1.02e-16	1.60411	0.0864	NOT	303.86	1.42e-16	1.62851	0.46	NOT	2.11514	0.0242	NOT	1.14839	0.466	NOT	1.32783	0.38	NOT	0.710127	0.226	NOT
TU0269	1	+	5856823	5857741			AT1G17140.1		600.09	1.33e-09	487.396	1.22e-11	358.698	1.95e-07	354.98	5.49e-10	1.69049	0.303	NOT	582.139	1.46e-09	0.83725	0.255	NOT	405.126	1.85e-09	0.885399	0.452	NOT	0.812205	0.325	NOT	0.59774	0.377	NOT	1.63992	0.0585	NOT	1.14126	0.284	NOT
TU0270	1	-	5888827	5895694			AT1G17220.1		2427.75	2.05e-13	1822.26	5.93e-08	1125.43	7.05e-07	3205.55	8.71e-10	0.757358	0.269	NOT	1334.04	1.67e-07	1.36597	0.157	NOT	834.821	2.71e-10	1.34811	0.235	NOT	0.750596	0.186	NOT	0.463569	0.0303	DIFF	0.416166	0.0287	DIFF	0.26043	0.00212	DIFF
TU0271	1	+	5927994	5928715			AT1G17310.1		669.166	1.08e-10	781.096	3.98e-08	823.177	7.16e-08	505.926	1.77e-09	1.32266	0.271	NOT	738.92	1.75e-09	1.05708	0.493	NOT	442.042	0.000526291	1.86221	0.131	NOT	1.16727	0.391	NOT	1.23015	0.273	NOT	1.46053	0.138	NOT	0.873729	0.457	NOT
TU0272	1	-	5948171	5951042			AT1G17360.1		343.518	1.99e-09	395.215	7.58e-11	286.489	4.86e-06	329.681	6.5e-06	1.04197	0.212	NOT	275.963	1.25e-06	1.43213	0.00597	NOT	195.135	0.00133697	1.46816	0.114	NOT	1.15049	0.288	NOT	0.833985	0.053	NOT	0.837061	0.13	NOT	0.59189	0.0239	DIFF
TU0273	1	-	5977528	5983230			AT1G17420.1,AT1G17430.1		230.191	3.83e-06	258.5	2.95e-06	298.124	1.81e-11	252.011	2.04e-10	0.913416	0.197	NOT	276.909	7.08e-08	0.93352	0.299	NOT	287.939	1.88e-05	1.03537	0.289	NOT	1.12298	0.419	NOT	1.29512	0.114	NOT	1.0988	0.439	NOT	1.14257	0.416	NOT
TU0274	1	-	6005578	6006218			AT1G17470.1		536.459	8.83e-08	447.609	9.69e-12	405.616	1.09e-05	595.72	6.92e-11	0.900522	0.0658	NOT	600.941	5.47e-07	0.744847	0.488	NOT	471.139	1.7e-07	0.860926	0.264	NOT	0.834377	0.496	NOT	0.756099	0.391	NOT	1.00876	0.0846	NOT	0.790873	0.118	NOT
TU0275	1	-	6081327	6082160			AT1G17680.1		436.796	0.000107192	375.667	0.000248634	479.27	0.00240181	842.178	3.58e-09	0.51865	0.00824	NOT	387.628	5.25e-09	0.969143	0.285	NOT	476.863	0.000229719	1.00505	0.417	NOT	0.860051	0.235	NOT	1.09724	0.193	NOT	0.460268	0.00737	DIFF	0.566226	0.00213	DIFF
TU0276	1	-	6098543	6100302			AT1G17730.1		510.018	3.3e-09	311.439	4.42e-05	310.452	0.000835221	481.903	1.02e-11	1.05834	0.314	NOT	384.339	4.22e-07	0.810324	0.345	NOT	316.748	0.000378247	0.980123	0.395	NOT	0.610643	0.00896	DIFF	0.608708	0.00874	DIFF	0.797544	0.00879	DIFF	0.657286	0.00346	DIFF
TU0277	1	-	6103558	6105096			AT1G17745.1		657.705	1.61e-14	418.286	7.45e-10	284.729	2.12e-07	489.468	6.25e-12	1.34371	0.0986	NOT	393.868	5.52e-10	1.062	0.403	NOT	350.208	4.21e-11	0.813028	0.276	NOT	0.635978	0.00535	DIFF	0.432913	5.44e-05	DIFF	0.804686	0.182	NOT	0.715487	0.0316	DIFF
TU0278	1	-	6124219	6124784			AT1G17780.1		403.958	6.02e-05	556.187	7.6e-08	243.9	0.000267291	538.197	1.46e-12	0.750576	0.139	NOT	523.197	5.09e-06	1.06305	0.406	NOT	394.928	0.000100475	0.617581	0.24	NOT	1.37684	0.207	NOT	0.603776	0.0761	NOT	0.972129	0.301	NOT	0.733798	0.0537	DIFF
TU0279	1	+	6151380	6152869			AT1G17870.1,AT1G17880.1		421.546	3.05e-07	656.041	4.33e-17	539.084	2.03e-10	392.565	1.81e-07	1.07382	0.419	NOT	642.205	1.52e-12	1.02154	0.347	NOT	486.247	4.08e-09	1.10866	0.268	NOT	1.55627	0.0796	NOT	1.27883	0.205	NOT	1.63592	0.176	NOT	1.23864	0.491	NOT
TU0280	1	+	6164606	6165731			AT1G17920.1		308.404	0.000296901	449.114	1.55e-10	409.423	6.23e-06	372.212	0.00150672	0.828571	0.115	NOT	298.202	2.03e-05	1.50607	0.0458	NOT	371.102	2.6e-05	1.10326	0.43	NOT	1.45625	0.148	NOT	1.32755	0.477	NOT	0.801162	0.28	NOT	0.997018	0.0898	NOT
TU0281	1	+	6211204	6213448			AT1G18050.1,AT1G18060.1		424.586	3.14e-09	423.951	9.25e-10	266.647	0.00103467	472.609	1.32e-11	0.898387	0.0637	NOT	348.028	4.05e-10	1.21815	0.385	NOT	411.506	3.65e-11	0.647978	0.0193	NOT	0.998504	0.413	NOT	0.628016	0.0769	NOT	0.736397	0.0493	NOT	0.870711	0.14	NOT
TU0282	1	+	6220330	6220634					958.836	7.11e-26	1298.18	2.38e-20	2502.54	6.46e-31	682.15	8.06e-22	1.40561	0.177	NOT	385.816	5.26e-09	3.36476	0.0453	NOT	1047.21	1.35e-33	2.38972	0.128	NOT	1.35391	0.441	NOT	2.60998	0.0716	NOT	0.565588	0.0788	NOT	1.53516	0.05	DIFF
TU0283	1	-	6222239	6223222			AT1G18080.1		843.301	5.3e-14	835.855	1.58e-10	566.55	2.12e-07	1081.74	4.72e-13	0.779578	0.276	NOT	893.01	4.57e-12	0.935997	0.301	NOT	951.052	2.2e-07	0.595709	0.401	NOT	0.99117	0.151	NOT	0.671824	0.147	NOT	0.825531	0.131	NOT	0.879187	0.106	NOT
TU0284	1	+	6268113	6268979			AT1G18210.1		464.754	1.32e-09	425.167	5.96e-07	383.16	1.29e-05	457.04	6.92e-07	1.01688	0.244	NOT	680.188	2.63e-09	0.625073	0.0381	NOT	379.835	0.00025795	1.00875	0.472	NOT	0.914822	0.0673	NOT	0.824436	0.103	NOT	1.48825	0.124	NOT	0.831076	0.302	NOT
TU0285	1	+	6278838	6279987			AT1G18260.1		586.423	1.12e-08	539.857	0.00013881	738.579	7.56e-07	585.551	2.58e-05	1.00149	0.237	NOT	1057.23	1.24e-10	0.510633	0.0415	NOT	632.868	9.32e-06	1.16703	0.317	NOT	0.920593	0.257	NOT	1.25946	0.407	NOT	1.80553	0.0325	DIFF	1.08081	0.188	NOT
TU0286	1	-	6396872	6399612			AT1G18580.1,AT1G18590.1		293.049	6.48e-06	236.976	0.000190534	261.214	0.000526598	425.11	4.68e-13	0.689349	0.019	NOT	298.877	1.03e-09	0.792888	0.0593	NOT	212.391	0.00316226	1.22987	0.485	NOT	0.808657	0.0943	NOT	0.891366	0.173	NOT	0.703058	0.0347	DIFF	0.499614	0.000869	DIFF
TU0287	1	-	6441560	6443019			AT1G18700.1		349.46	2.38e-05	484.771	3.09e-08	368.882	0.00010514	382.882	8.08e-05	0.912709	0.429	NOT	521.563	7.9e-06	0.929458	0.3	NOT	443.862	6.6e-10	0.831074	0.141	NOT	1.3872	0.0893	NOT	1.05558	0.445	NOT	1.3622	0.224	NOT	1.15927	0.136	NOT
TU0288	1	-	6452304	6452963			AT1G18710.1		3319.79	1.13e-30	2530.24	1.06e-28	2728.56	6.55e-27	3361.24	6.81e-30	0.987668	0.409	NOT	2298.13	7.56e-25	1.101	0.492	NOT	2709.72	5.16e-27	1.00695	0.498	NOT	0.762169	0.0332	NOT	0.821907	0.0857	NOT	0.683715	0.0344	DIFF	0.806167	0.0737	NOT
TU0289	1	-	6464166	6466977	AT1G18745	AT1G18745	AT1G18740.1		2123.66	1.38e-21	2560.64	2.7e-24	7741.85	6.56e-42	860.323	2.8e-16	2.46844	0.0127	NOT	1168.76	1.21e-15	2.1909	0.00689	NOT	6452.38	1.18e-38	1.19984	0.22	NOT	1.20577	0.213	NOT	3.64552	0.000177	DIFF	1.35851	0.236	NOT	7.49995	2.92e-07	DIFF
TU0290	1	+	6466621	6467086	AT1G18750	AT1G18750			746.667	1.22e-11	1357.39	5.17e-11	737.947	2.26e-07	464.352	1.49e-06	1.60798	0.201	NOT	569.726	1.53e-06	2.38253	0.0149	NOT	692.437	2.9e-07	1.06572	0.496	NOT	1.81793	0.0353	NOT	0.988321	0.496	NOT	1.22693	0.203	NOT	1.49119	0.313	NOT
TU0291	1	-	6550523	6551859			AT1G18950.1		546.331	4.87e-12	582.74	1.51e-10	497.686	3.72e-12	602.012	3.48e-12	0.907508	0.365	NOT	497.158	5.75e-08	1.17214	0.43	NOT	394.45	4.09e-09	1.26172	0.147	NOT	1.06664	0.126	NOT	0.910961	0.239	NOT	0.825827	0.0497	NOT	0.655219	0.0169	DIFF
TU0292	1	+	6560853	6561662			AT1G19000.1		1311.56	2.42e-25	602.158	1.12e-15	620.758	1.05e-10	1215.73	1.1e-14	1.07883	0.155	NOT	587.878	1.61e-07	1.02429	0.444	NOT	505.434	1.45e-09	1.22817	0.298	NOT	0.459116	0.00314	DIFF	0.473297	0.0033	DIFF	0.48356	0.0425	DIFF	0.415745	0.0397	DIFF
TU0293	1	-	6566394	6567088			AT1G19010.1		317.513	0.00170658	535.711	5.26e-10	360.433	0.000254725	462.155	1.69e-06	0.687027	0.48	NOT	535.952	1.97e-08	0.99955	0.377	NOT	338.313	9.02e-09	1.06538	0.303	NOT	1.68721	0.19	NOT	1.13518	0.433	NOT	1.15968	0.389	NOT	0.732034	0.398	NOT
TU0294	1	-	6572144	6573104			AT1G19030.1		422.817	1.11e-07	356.735	1.39e-05	452.626	1.02e-08	536.78	2.82e-18	0.787691	0.0591	NOT	286.162	1.88e-05	1.24662	0.336	NOT	419.734	7.98e-12	1.07836	0.233	NOT	0.84371	0.468	NOT	1.0705	0.477	NOT	0.533109	0.00899	DIFF	0.781948	0.152	NOT
TU0295	1	-	6612601	6613676			AT1G19150.1		805.762	4.63e-13	943.653	3.68e-15	344.666	3.73e-07	603.358	3.03e-08	1.33546	0.321	NOT	737.38	1.16e-08	1.27974	0.152	NOT	453.577	4.53e-15	0.759884	0.0593	NOT	1.17113	0.239	NOT	0.427752	0.0226	DIFF	1.22213	0.218	NOT	0.751754	0.127	NOT
TU0296	1	+	6671392	6672662			AT1G19300.1		392.449	3.05e-09	370.193	1.24e-07	428.075	3.77e-06	300.66	2.06e-06	1.30529	0.0502	NOT	516.838	2.14e-10	0.716265	0.0413	NOT	401.819	3.21e-07	1.06534	0.441	NOT	0.943289	0.123	NOT	1.09078	0.257	NOT	1.71901	0.0149	DIFF	1.33646	0.204	NOT
TU0297	1	+	6690508	6695137			AT1G19360.1,AT1G19370.1		339.129	6.1e-11	255.05	1.11e-08	277.388	1e-09	362.613	5.39e-13	0.935237	0.155	NOT	272.473	1.56e-14	0.936056	0.319	NOT	208.514	5.26e-10	1.33031	0.147	NOT	0.752074	0.0551	NOT	0.817942	0.101	NOT	0.751415	0.0195	DIFF	0.575032	0.000586	DIFF
TU0298	1	+	6696981	6697164					429.459	0.000871019	227.847	0.000325353	4818.2	2.26e-16	387.481	0.00116738	1.10834	0.286	NOT	603.926	1.35e-05	0.377276	0.217	NOT	4159.71	8.72e-21	1.1583	0.148	NOT	0.530544	0.422	NOT	11.2192	0.000443	DIFF	1.5586	0.487	NOT	10.7353	7.12e-06	DIFF
TU0299	1	-	6759780	6762675			AT1G19520.1		290.709	1.37e-09	264.009	1.91e-07	194.221	4.42e-05	350.877	6.01e-13	0.828521	0.0737	NOT	249.98	4.77e-06	1.05612	0.464	NOT	221.953	2.61e-05	0.875055	0.431	NOT	0.908156	0.202	NOT	0.668094	0.124	NOT	0.712443	0.0101	DIFF	0.632566	0.00298	DIFF
TU0300	1	-	6771998	6772896					333.554	0.000107192	330.656	3.06e-09	507.581	2.52e-07	425.363	2.65e-09	0.784163	0.146	NOT	526.872	8.46e-14	0.627583	0.11	NOT	332.113	7.62e-06	1.52834	0.404	NOT	0.991312	0.288	NOT	1.52174	0.312	NOT	1.23864	0.169	NOT	0.780775	0.26	NOT
TU0301	1	+	6773325	6773939			AT1G19570.1		1491.83	1.47e-09	794.682	3.29e-07	614.596	2.55e-06	1322.93	2.17e-13	1.12767	0.397	NOT	1184.8	7.81e-12	0.670731	0.184	NOT	883.81	8.3e-09	0.695394	0.394	NOT	0.532689	0.0747	NOT	0.411975	0.0533	NOT	0.895588	0.397	NOT	0.66807	0.123	NOT
TU0302	1	-	6776749	6777411			AT1G19580.1		523.285	1.23e-05	610.668	3.06e-09	461.102	1.06e-07	423.255	2e-07	1.23634	0.435	NOT	467.173	3.16e-06	1.30716	0.0545	NOT	439.257	1.1e-07	1.04973	0.408	NOT	1.16699	0.128	NOT	0.881168	0.374	NOT	1.10376	0.29	NOT	1.03781	0.391	NOT
TU0303	1	-	6783742	6785051			AT1G19620.1		364.139	4.94e-11	180.092	0.00023846	273.622	2.53e-05	266.013	0.000287278	1.36888	0.227	NOT	292.765	4.06e-05	0.615142	0.365	NOT	198.787	0.000208205	1.37646	0.47	NOT	0.494569	0.05	NOT	0.751422	0.137	NOT	1.10057	0.336	NOT	0.747283	0.367	NOT
TU0304	1	+	6803649	6805061			AT1G19670.1		987.005	1.27e-11	1510.69	1.44e-12	1039.54	1.43e-19	2337.84	1.23e-19	0.422187	0.0191	NOT	2681.87	3.39e-24	0.563297	0.0659	NOT	1274.61	3.52e-12	0.815575	0.363	NOT	1.53058	0.318	NOT	1.05323	0.132	NOT	1.14716	0.496	NOT	0.545208	0.0876	NOT
TU0305	1	-	6816088	6816598			AT1G19710.1		337.735	3.65e-08	689.046	7.46e-10	355.357	2.14e-09	767.068	1.68e-13	0.440293	0.00384	NOT	298.877	1.12e-09	2.30545	0.192	NOT	341.06	7.41e-10	1.04192	0.458	NOT	2.0402	0.138	NOT	1.05218	0.347	NOT	0.389636	0.00727	DIFF	0.444628	0.0115	DIFF
TU0306	1	-	6824346	6825378			AT1G19740.1		475.342	8.84e-09	367.979	0.000733626	414.837	7.85e-09	571.46	6.15e-09	0.831803	0.222	NOT	416.242	1.63e-07	0.884051	0.287	NOT	285.726	0.00149493	1.45187	0.0956	NOT	0.774135	0.336	NOT	0.872713	0.35	NOT	0.728383	0.0573	NOT	0.499993	0.013	DIFF
TU0307	1	-	6832185	6833638			AT1G19770.1		645.365	7.94e-11	533.733	4.37e-10	411.038	1.85e-08	498.728	2.71e-10	1.29402	0.493	NOT	663.273	1.91e-11	0.804696	0.49	NOT	370.643	2.31e-08	1.10899	0.183	NOT	0.827025	0.499	NOT	0.636908	0.0367	NOT	1.32993	0.473	NOT	0.743177	0.133	NOT
TU0308	1	+	6856205	6859029			AT1G19835.1		362.787	1.59e-12	302.892	1.81e-09	263.774	5.27e-06	343.385	3.06e-09	1.0565	0.197	NOT	302.565	2.62e-07	1.00108	0.481	NOT	262.319	1.84e-07	1.00555	0.393	NOT	0.834903	0.083	NOT	0.727077	0.00391	DIFF	0.881125	0.34	NOT	0.763921	0.082	NOT
TU0309	1	+	6895333	6898747			AT1G19870.1		351.665	3.45e-09	264.674	1.51e-05	291.508	1.99e-07	391.941	1.5e-13	0.89724	0.133	NOT	224.922	9.37e-05	1.17674	0.195	NOT	240.54	8.88e-06	1.21189	0.147	NOT	0.752631	0.0213	NOT	0.828937	0.0561	NOT	0.573867	3.57e-05	DIFF	0.613715	0.000124	DIFF
TU0310	1	+	6937962	6939050			AT1G20010.1		633.601	1.58e-13	392.255	1.23e-10	354.813	3.43e-06	749.072	4.13e-19	0.845848	0.218	NOT	384.834	9.02e-09	1.01928	0.417	NOT	211.023	0.00868944	1.68139	0.067	NOT	0.619088	0.0298	NOT	0.559994	0.0395	NOT	0.513748	0.00587	DIFF	0.281713	4.16e-05	DIFF
TU0311	1	-	6941850	6946992			AT1G20020.1		1478.69	3.38e-12	868.942	6.1e-08	613.448	3.05e-08	1818.76	2.73e-12	0.813021	0.393	NOT	1185.89	8.8e-12	0.732734	0.267	NOT	748.513	1.58e-08	0.819556	0.452	NOT	0.587643	0.182	NOT	0.414859	0.0828	NOT	0.652032	0.257	NOT	0.411551	0.0595	DIFF
TU0312	1	+	6969357	6970832			AT1G20100.1		424.368	6.11e-09	498.467	2.75e-15	423.946	6.02e-11	501.03	1.35e-10	0.846991	0.105	NOT	888.822	3.61e-20	0.560818	0.0193	NOT	708.05	8.47e-21	0.598752	0.017	NOT	1.17461	0.265	NOT	0.999006	0.433	NOT	1.77399	0.0416	DIFF	1.41319	0.154	NOT
TU0313	1	-	6977974	6978580			AT1G20130.1		525.017	9.76e-07	480.901	1.91e-07	460.774	1.93e-09	476.435	1.37e-05	1.10197	0.444	NOT	573.244	6.77e-09	0.838912	0.405	NOT	794.957	2.06e-07	0.579621	0.261	NOT	0.915972	0.309	NOT	0.877636	0.436	NOT	1.20319	0.253	NOT	1.66855	0.184	NOT
TU0314	1	-	7019776	7020392			AT1G20260.1		4141.87	5.18e-14	3999.37	1.71e-10	2559.83	2.24e-10	5036.49	4.86e-11	0.822372	0.409	NOT	4145.06	7.15e-10	0.964852	0.364	NOT	2407.84	4.42e-05	1.06312	0.322	NOT	0.965595	0.322	NOT	0.618037	0.0921	NOT	0.823006	0.386	NOT	0.478079	0.0595	DIFF
TU0315	1	+	7042484	7043378			AT1G20340.1		1576.88	3.45e-23	1410.58	1.83e-22	1200.68	6.12e-19	1380.18	1.24e-17	1.14252	0.393	NOT	1729.27	1.84e-20	0.815708	0.383	NOT	1396.14	4.83e-21	0.86	0.174	NOT	0.894539	0.3	NOT	0.761428	0.146	NOT	1.25293	0.496	NOT	1.01156	0.478	NOT
TU0316	1	+	7071898	7075873			AT1G20400.1		223.935	3.87e-05	291.196	3.36e-11	314.566	1.97e-16	229.665	5.96e-06	0.975051	0.307	NOT	243.508	2.23e-05	1.19584	0.076	NOT	254.463	3.44e-06	1.2362	0.312	NOT	1.30036	0.109	NOT	1.40472	0.117	NOT	1.06027	0.239	NOT	1.10797	0.424	NOT
TU0317	1	+	7084612	7085652			AT1G20440.1		768.605	3.55e-08	1421.46	2.35e-17	1158.33	7.58e-12	929.508	2.67e-15	0.826894	0.181	NOT	2289.64	1.05e-28	0.620822	0.0663	NOT	1156.88	1.69e-15	1.00125	0.298	NOT	1.8494	0.0259	NOT	1.50705	0.247	NOT	2.46328	0.0129	DIFF	1.24462	0.402	NOT
TU0318	1	+	7088175	7089884			AT1G20450.1		1010.06	2.5e-24	1316.38	4.86e-28	1807.39	7.75e-38	1185.4	5.43e-35	0.852084	0.0898	NOT	1629.32	5.13e-22	0.807932	0.451	NOT	1600.25	2.68e-34	1.12944	0.445	NOT	1.30327	0.078	NOT	1.78939	0.00814	DIFF	1.37449	0.394	NOT	1.34997	0.0761	NOT
TU0319	1	+	7093041	7093393					2566.28	3.54e-25	2965	6.7e-22	2685.39	2.73e-27	2220.07	3.79e-17	1.15595	0.258	NOT	4281.62	2.75e-27	0.692495	0.0519	NOT	3361.65	3.58e-30	0.798831	0.115	NOT	1.15537	0.401	NOT	1.04641	0.43	NOT	1.9286	0.011	DIFF	1.51421	0.0418	DIFF
TU0320	1	+	7115488	7115888			AT1G20550.1		611.395	5.86e-09	525.075	3.48e-11	805.177	7.21e-11	441.388	6.71e-07	1.38516	0.29	NOT	531.106	4.53e-15	0.988644	0.328	NOT	761.442	8.4e-09	1.05744	0.461	NOT	0.858815	0.313	NOT	1.31695	0.477	NOT	1.20326	0.263	NOT	1.72511	0.328	NOT
TU0321	1	+	7119998	7122057			AT1G20560.1,AT1G20570.1		182.48	0.000231213	253.299	6.07e-07	182.697	0.00360083	345.065	6.6e-11	0.528828	0.00333	NOT	226.975	8.68e-19	1.11598	0.454	NOT	266.449	7.54e-08	0.685673	0.0316	NOT	1.38809	0.101	NOT	1.00119	0.392	NOT	0.657775	0.0452	DIFF	0.77217	0.0746	NOT
TU0322	1	-	7144351	7146429			AT1G20620.1		1528.02	2.46e-23	944.868	1.08e-16	744.107	1.22e-13	1736.76	9.44e-26	0.879811	0.0159	NOT	1034.05	3.68e-22	0.913755	0.225	NOT	742.472	7.51e-20	1.0022	0.484	NOT	0.618361	0.0576	NOT	0.486975	0.0155	DIFF	0.59539	0.00133	DIFF	0.427504	6.6e-06	DIFF
TU0323	1	+	7158400	7159149			AT1G20650.1		409.908	1.57e-08	287.399	3.91e-05	261.007	0.000830538	462.645	1.64e-13	0.88601	0.121	NOT	226.754	0.010078	1.26745	0.0797	NOT	254.375	9.99e-05	1.02607	0.439	NOT	0.70113	0.206	NOT	0.636745	0.103	NOT	0.490125	0.000468	DIFF	0.549828	0.00292	DIFF
TU0324	1	+	7159381	7159761			AT1G20650.1		375.646	0.000249216	528.525	7.04e-11	322.983	0.00038164	353.212	0.000866885	1.06351	0.404	NOT	226.827	0.100024	2.33008	0.00529	NOT	180.731	0.174092	1.78709	0.22	NOT	1.40698	0.22	NOT	0.859807	0.223	NOT	0.642184	0.109	NOT	0.511679	0.128	NOT
TU0325	1	+	7167581	7168011			AT1G20670.1		2155.56	5.1e-10	2117.9	5.78e-13	1754.58	2.5e-12	1810.48	5.15e-10	1.1906	0.324	NOT	1836.56	8.93e-12	1.15319	0.421	NOT	1536.79	2.31e-08	1.14172	0.281	NOT	0.982529	0.497	NOT	0.813979	0.401	NOT	1.01441	0.396	NOT	0.84883	0.426	NOT
TU0326	1	-	7174435	7176529	AT1G20691	AT1G20691	AT1G20690.1		283.165	7.19e-06	659.259	7.1e-30	1362.55	1.33e-32	369.091	4.2e-07	0.767196	0.146	NOT	1259.95	2.27e-25	0.523242	0.00857	NOT	2489.21	1.2e-43	0.547383	0.00121	DIFF	2.32818	9.05e-05	DIFF	4.81186	7.32e-11	DIFF	3.41366	4.1e-07	DIFF	6.74416	6.66e-16	DIFF
TU0327	1	-	7178456	7178678			AT1G20693.1		7999.09	3.91e-08	778.208	0.000348849	1053.21	0.00133525	9221.04	1.91e-09	0.867482	0.481	NOT	1650.86	4.01e-06	0.471396	0.0839	NOT	616.747	0.047691	1.70769	0.34	NOT	0.0972871	0.00208	DIFF	0.131666	0.0018	DIFF	0.179032	0.0344	DIFF	0.0668848	0.00111	DIFF
TU0328	1	-	7197719	7198662			AT1G20730.1		399.474	1.11e-07	335.648	1.15e-05	547.515	7.31e-08	318.643	1.88e-05	1.25367	0.382	NOT	731.188	3.52e-12	0.459045	0.0469	NOT	473.925	2.01e-07	1.15528	0.413	NOT	0.840225	0.335	NOT	1.37059	0.431	NOT	2.29469	0.0533	NOT	1.48732	0.273	NOT
TU0329	1	-	7217849	7220634			AT1G20780.1		290.962	1.15e-06	383.413	5.74e-14	272.29	7.86e-06	221.171	7.14e-08	1.31555	0.214	NOT	236.868	7.16e-05	1.61868	0.00379	NOT	265.977	8.21e-12	1.02374	0.259	NOT	1.31774	0.118	NOT	0.935827	0.413	NOT	1.07097	0.223	NOT	1.20259	0.364	NOT
TU0330	1	-	7252199	7253213			AT1G20850.1		313.731	8.53e-06	412.947	1.17e-08	461.88	8.07e-09	583.778	5.17e-10	0.537415	0.0565	NOT	317.766	3.41e-05	1.29953	0.23	NOT	377.739	1.7e-07	1.22275	0.283	NOT	1.31625	0.411	NOT	1.47222	0.329	NOT	0.544327	0.0228	DIFF	0.647059	0.0328	DIFF
TU0331	1	-	7285216	7290494			AT1G20920.1		1115.57	2.21e-18	1643.08	3.83e-20	1833.85	1.1e-17	1353.83	1e-14	0.82401	0.149	NOT	1072.82	5.53e-16	1.53155	0.211	NOT	1359.78	9.91e-21	1.34864	0.491	NOT	1.47286	0.315	NOT	1.64387	0.349	NOT	0.792433	0.377	NOT	1.00439	0.295	NOT
TU0332	1	+	7294417	7295915			AT1G20930.1,AT1G20940.1		385.535	8.31e-07	273.302	0.0124334	422.673	3.95e-08	362.758	0.000443614	1.06279	0.3	NOT	351.759	0.000280635	0.776958	0.337	NOT	577.332	2.87e-09	0.732114	0.0811	NOT	0.70889	0.179	NOT	1.09633	0.393	NOT	0.96968	0.222	NOT	1.59151	0.0426	DIFF
TU0333	1	+	7306960	7309943			AT1G20960.1		237.229	0.000132143	317.658	6.56e-07	308.785	3.07e-07	320.662	8.37e-09	0.73981	0.0322	NOT	284.453	1.02e-05	1.11673	0.494	NOT	291.878	0.000158894	1.05792	0.224	NOT	1.33904	0.0848	NOT	1.30163	0.287	NOT	0.88708	0.289	NOT	0.910236	0.326	NOT
TU0334	1	-	7313938	7316873			AT1G20970.1		236.415	7.38e-07	326.89	8.55e-10	295.323	1.69e-07	265.977	0.00023454	0.888855	0.206	NOT	308.82	9.54e-06	1.05851	0.0718	NOT	236.535	7.62e-06	1.24854	0.361	NOT	1.3827	0.00183	DIFF	1.24917	0.172	NOT	1.16108	0.299	NOT	0.889306	0.358	NOT
TU0335	1	-	7317654	7319460			AT1G20970.1		1008.92	7.49e-20	982.836	2.19e-14	676.554	1.67e-14	942.344	4.91e-17	1.07065	0.437	NOT	942.904	2.33e-14	1.04235	0.445	NOT	781.807	2.62e-16	0.865372	0.34	NOT	0.974147	0.414	NOT	0.670572	0.249	NOT	1.00059	0.473	NOT	0.829641	0.118	NOT
TU0336	1	-	7327770	7329060			AT1G20980.1		387.729	2.57e-08	358.611	2.83e-06	338.679	3.85e-05	554.333	2.09e-09	0.699451	0.315	NOT	609.705	9.77e-11	0.588171	0.143	NOT	393.381	8.09e-07	0.860944	0.46	NOT	0.924901	0.403	NOT	0.873494	0.178	NOT	1.09989	0.41	NOT	0.709647	0.0846	NOT
TU0337	1	-	7374188	7374514			AT1G21065.1		444.373	6.49e-05	650.307	5.09e-09	470.135	0.000297977	486.578	5.61e-08	0.913262	0.293	NOT	657.315	3.05e-06	0.989338	0.28	NOT	482.71	3.45e-08	0.973949	0.427	NOT	1.46343	0.152	NOT	1.05797	0.291	NOT	1.35089	0.414	NOT	0.992051	0.367	NOT
TU0338	1	+	7411091	7412442			AT1G21160.1		893.695	5.16e-10	1043.96	1.63e-13	967.198	1.72e-14	910.389	1.98e-12	0.981663	0.487	NOT	1092.88	4e-16	0.955238	0.354	NOT	902.537	1.17e-11	1.07164	0.366	NOT	1.16814	0.188	NOT	1.08225	0.397	NOT	1.20045	0.324	NOT	0.991375	0.314	NOT
TU0339	1	-	7439093	7441879			AT1G21250.1		371.979	4.5e-11	317.622	2.7e-07	315.352	1.01e-07	299.765	1.23e-06	1.2409	0.0676	NOT	276.575	3.73e-07	1.14841	0.486	NOT	273.143	3.06e-09	1.15453	0.00923	NOT	0.853871	0.0361	NOT	0.847768	0.227	NOT	0.922639	0.35	NOT	0.91119	0.0515	DIFF
TU0340	1	-	7446132	7447383			AT1G21270.1		669.424	1.43e-16	654.696	1.4e-12	360.945	1.02e-06	516.254	3.11e-11	1.2967	0.256	NOT	360.669	2.04e-05	1.81523	0.0252	NOT	247.865	2.73e-05	1.45622	0.286	NOT	0.977999	0.197	NOT	0.539187	0.00894	DIFF	0.698627	0.00758	DIFF	0.480122	0.00764	DIFF
TU0341	1	+	7453462	7455255			AT1G21310.1		1266.56	1.43e-20	1372.58	2.7e-13	1502.31	1.87e-18	1131.99	2.22e-09	1.11888	0.317	NOT	1214.48	3.96e-13	1.13018	0.367	NOT	949.561	1.26e-11	1.58211	0.332	NOT	1.08371	0.411	NOT	1.18613	0.289	NOT	1.07287	0.269	NOT	0.838842	0.332	NOT
TU0342	1	-	7534123	7534518	AT1G21520	AT1G21520			929.173	5.13e-09	549.4	1.08e-05	791.847	9.64e-05	2623.24	2.8e-16	0.354208	0.0196	NOT	1734.2	7.72e-15	0.316803	0.00243	DIFF	2440.23	4.81e-15	0.324497	0.00278	NOT	0.591278	0.096	NOT	0.852206	0.0593	NOT	0.661091	0.166	NOT	0.930235	0.263	NOT
TU0343	1	+	7566627	7566807			AT1G21590.1		575.549	1.4e-11	405.811	4e-05	319.863	0.00630389	665.66	0.000736599	0.864629	0.475	NOT	131.925	3.18e-05	3.07607	0.0115	NOT	279.792	3.87e-05	1.14322	0.359	NOT	0.705085	0.102	NOT	0.555753	0.0405	NOT	0.198187	0.00267	DIFF	0.420323	0.0692	NOT
TU0344	1	+	7571112	7571607			AT1G21600.1		1695.06	4.13e-11	1913.9	2.5e-12	1393.28	8.45e-15	2004.22	2.31e-12	0.845745	0.306	NOT	1262.65	1.43e-06	1.51578	0.0592	NOT	1628.18	8.45e-10	0.855728	0.315	NOT	1.1291	0.386	NOT	0.821965	0.357	NOT	0.629996	0.0564	NOT	0.812376	0.377	NOT
TU0345	1	-	7610202	7616052			AT1G21680.1		432.025	1.65e-14	441.23	1e-10	492.154	7.71e-12	600.235	1.2e-15	0.71976	0.177	NOT	450.916	8.31e-12	0.978519	0.299	NOT	438.372	1.16e-08	1.12269	0.184	NOT	1.02131	0.278	NOT	1.13918	0.396	NOT	0.751232	0.165	NOT	0.730334	0.0631	DIFF
TU0346	1	+	7641220	7641545					897.425	7.11e-06	753.237	2.46e-05	850.023	7.31e-09	745.272	8.37e-09	1.20416	0.142	NOT	502.764	1.12e-08	1.49819	0.273	NOT	824.107	8.8e-08	1.03145	0.327	NOT	0.839331	0.296	NOT	0.94718	0.259	NOT	0.674605	0.0674	NOT	1.10578	0.148	NOT
TU0347	1	-	7647782	7648640			AT1G21750.1		988.535	1.5e-06	932.555	2.68e-08	1255.49	1.45e-13	1368.84	1.26e-08	0.72217	0.226	NOT	1847.28	3.07e-11	0.504826	0.489	NOT	687.481	3.91e-06	1.82622	0.221	NOT	0.943371	0.428	NOT	1.27005	0.328	NOT	1.34952	0.316	NOT	0.502236	0.183	NOT
TU0348	1	+	7690954	7691235			AT1G21900.1		378.163	8.51e-05	339.786	7.02e-05	249.087	0.000169967	224.983	0.186452	1.68085	0.273	NOT	858.656	7.22e-09	0.395718	0.0142	NOT	766.861	7.67e-10	0.324814	0.00135	DIFF	0.898517	0.454	NOT	0.658676	0.265	NOT	3.81654	0.00909	DIFF	3.40853	0.00233	DIFF
TU0349	1	-	7734985	7736358			AT1G21980.1		435.909	5.32e-09	491.092	1.66e-07	393.765	3.05e-09	413.072	9.55e-06	1.05529	0.458	NOT	439.555	6.77e-09	1.11725	0.439	NOT	537.472	1.49e-08	0.732624	0.202	NOT	1.12659	0.123	NOT	0.903319	0.378	NOT	1.06411	0.0529	NOT	1.30116	0.0899	NOT
TU0350	1	+	7759310	7761105			AT1G22030.1		383.598	1.65e-07	393.381	1.55e-10	488.589	2.03e-11	415.019	1.47e-07	0.92429	0.236	NOT	421.582	1.26e-09	0.933107	0.461	NOT	462.548	2.87e-10	1.0563	0.358	NOT	1.0255	0.294	NOT	1.2737	0.214	NOT	1.01581	0.493	NOT	1.11452	0.314	NOT
TU0351	1	+	7765959	7766848					1913.18	2.22e-12	1502.24	2.24e-06	1613.15	0.000292374	2062.22	1.9e-12	0.927728	0.0504	NOT	1514.3	3.87e-10	0.992036	0.169	NOT	1900.61	1.56e-10	0.848754	0.0155	NOT	0.785206	0.477	NOT	0.843177	0.118	NOT	0.734306	0.244	NOT	0.921633	0.381	NOT
TU0352	1	+	7801669	7802460			AT1G22110.1		613.984	3.19e-11	365.042	1.93e-06	468.956	1.01e-06	486.958	1.21e-05	1.26086	0.2	NOT	460.973	8.96e-06	0.791895	0.351	NOT	365.231	1.34e-07	1.284	0.413	NOT	0.594546	0.0626	NOT	0.763792	0.0901	NOT	0.946638	0.368	NOT	0.750026	0.246	NOT
TU0353	1	+	7880384	7880748			AT1G22300.1		565.881	7.99e-09	449.788	0.000613087	305.256	0.140196	514.482	0.00135665	1.0999	0.136	NOT	283.507	0.0894123	1.58651	0.125	NOT	382.413	0.00406746	0.798236	0.24	NOT	0.794846	0.0734	NOT	0.539435	0.0103	DIFF	0.551053	0.09	NOT	0.743297	0.28	NOT
TU0354	1	-	7892606	7894604					820.317	1.66e-14	750.88	1.38e-11	627.725	1.15e-13	681.952	6.35e-12	1.2029	0.0568	NOT	775.567	8.85e-12	0.968169	0.329	NOT	578.421	2.2e-09	1.08524	0.415	NOT	0.915353	0.361	NOT	0.765222	0.0407	NOT	1.13728	0.189	NOT	0.848184	0.486	NOT
TU0355	1	+	7892910	7902275			AT1G22360.1		1120.1	7.48e-16	1157.28	7.43e-19	864.897	5.4e-11	1139.94	1.53e-17	0.982596	0.49	NOT	932.85	3.94e-16	1.24059	0.493	NOT	1262.82	1.85e-14	0.684893	0.38	NOT	1.03319	0.466	NOT	0.772161	0.149	NOT	0.818333	0.49	NOT	1.1078	0.255	NOT
TU0356	1	+	7903915	7904797			AT1G22400.1		264.471	0.00222206	504.649	3.98e-08	280.306	4.03e-05	377.865	0.000158415	0.699909	0.208	NOT	601.543	1.05e-13	0.838924	0.468	NOT	352.407	1.14e-06	0.795404	0.44	NOT	1.90814	0.0407	NOT	1.05987	0.472	NOT	1.59195	0.148	NOT	0.932627	0.254	NOT
TU0357	1	-	7913459	7914729			AT1G22410.1		581.442	1.35e-09	530.858	1.58e-10	296.96	0.00247388	744.398	5.55e-07	0.78109	0.365	NOT	447.586	3.27e-05	1.18605	0.484	NOT	358.757	2.21e-08	0.827747	0.158	NOT	0.913003	0.088	NOT	0.51073	0.00061	DIFF	0.601272	0.0538	NOT	0.481942	0.0092	DIFF
TU0358	1	-	7921211	7921610			AT1G22430.1		558.171	3.27e-05	537.906	0.0188161	443.971	0.00413273	651.415	8.28e-11	0.856859	0.1	NOT	416.968	0.0587391	1.29004	0.14	NOT	307.309	0.00133586	1.44471	0.338	NOT	0.963694	0.355	NOT	0.795403	0.233	NOT	0.640096	0.0121	DIFF	0.471756	0.00202	DIFF
TU0359	1	+	7956921	7958570			AT1G22530.1		511.988	3.13e-12	380.833	1.49e-09	444.647	8.58e-10	474.506	9.37e-11	1.07899	0.411	NOT	404.669	3.25e-10	0.941098	0.383	NOT	351.555	1.74e-07	1.2648	0.318	NOT	0.743832	0.247	NOT	0.868472	0.242	NOT	0.852822	0.221	NOT	0.740886	0.168	NOT
TU0360	1	+	7987053	7989211			AT1G22600.1		850.749	4.07e-12	676.428	6.68e-09	790.59	1.13e-09	613.672	1.67e-08	1.38633	0.24	NOT	594.301	1.15e-17	1.13819	0.419	NOT	740.008	2.13e-09	1.06835	0.482	NOT	0.795097	0.304	NOT	0.929287	0.383	NOT	0.968434	0.374	NOT	1.20587	0.363	NOT
TU0361	1	-	7994177	7997501			AT1G22610.1		469.357	4.63e-13	421.02	1.77e-09	376.489	7.99e-12	505.466	3.9e-12	0.928563	0.164	NOT	483.03	7.21e-12	0.871623	0.436	NOT	348.557	7.82e-08	1.08014	0.472	NOT	0.897014	0.176	NOT	0.802138	0.064	NOT	0.955613	0.0435	DIFF	0.689576	0.00532	DIFF
TU0362	1	-	8005988	8007129			AT1G22640.1		441.074	3.73e-07	472.084	8.01e-12	239.572	5.08e-05	552.928	4.24e-10	0.797706	0.158	NOT	364.008	0.000284547	1.29691	0.214	NOT	255.306	6.73e-05	0.938372	0.492	NOT	1.07031	0.47	NOT	0.543156	0.0169	DIFF	0.658328	0.025	DIFF	0.461735	0.000983	DIFF
TU0363	1	+	8028255	8028833			AT1G22700.1		866.551	5.86e-13	685.247	1.08e-13	704.138	5.16e-14	756.269	2.81e-16	1.14582	0.26	NOT	595.064	9.8e-12	1.15155	0.394	NOT	1027.37	4.97e-15	0.685379	0.308	NOT	0.790775	0.358	NOT	0.812575	0.492	NOT	0.786842	0.0852	NOT	1.35847	0.308	NOT
TU0364	1	+	8031701	8033171			AT1G22710.1		452.407	6.11e-13	420.528	5.39e-11	316.328	7.45e-09	551.646	3.78e-18	0.820104	0.162	NOT	302.762	9.02e-09	1.38897	0.239	NOT	291.071	1.2e-05	1.08677	0.427	NOT	0.929535	0.285	NOT	0.699211	0.044	NOT	0.548834	0.0103	DIFF	0.527641	0.00126	DIFF
TU0365	1	-	8095152	8097558			AT1G22880.1		1184.07	6.39e-28	1509.38	3.89e-33	1654.24	2.77e-36	1398.41	1.03e-31	0.846726	0.213	NOT	1617.25	1.78e-41	0.9333	0.319	NOT	1622.8	2.45e-38	1.01937	0.488	NOT	1.27474	0.0503	NOT	1.39708	0.0215	DIFF	1.15649	0.0801	NOT	1.16046	0.114	NOT
TU0366	1	-	8100481	8101210			AT1G22882.1		1708.21	2.15e-13	1751.76	3.55e-15	2360.59	4.49e-12	2001.2	1.91e-11	0.853593	0.482	NOT	1912.87	4.59e-13	0.915776	0.471	NOT	2482.66	9.72e-11	0.950831	0.168	NOT	1.02549	0.418	NOT	1.38191	0.462	NOT	0.955861	0.482	NOT	1.24059	0.256	NOT
TU0367	1	-	8117825	8121881			AT1G22930.1		372.191	8.2e-12	553.785	1.43e-20	295.182	3.05e-09	389.474	6.92e-15	0.955625	0.278	NOT	671.752	6.25e-30	0.824389	0.136	NOT	486.946	4.52e-21	0.60619	0.00118	DIFF	1.48791	0.000965	DIFF	0.793093	0.107	NOT	1.72477	0.000291	DIFF	1.25027	0.108	NOT
TU0368	1	-	8143899	8144658			AT1G23000.1		435.736	1.16e-08	537.31	2.66e-13	611.017	2.34e-08	441.794	1.7e-06	0.986288	0.401	NOT	546.317	1.09e-11	0.983513	0.363	NOT	321.806	2.97e-06	1.89871	0.222	NOT	1.23311	0.425	NOT	1.40226	0.418	NOT	1.23659	0.35	NOT	0.728407	0.163	NOT
TU0369	1	+	8188248	8189137			AT1G23090.1		273.817	0.000252019	401.089	3.8e-08	270.16	0.000830538	418.323	1.08e-08	0.654559	0.0436	NOT	767.783	1.96e-20	0.522399	0.00232	DIFF	729.145	1.53e-18	0.370516	0.00216	NOT	1.46481	0.283	NOT	0.986644	0.362	NOT	1.83538	0.0142	DIFF	1.74302	0.042	DIFF
TU0370	1	-	8200161	8200996			AT1G23130.1		1759.09	1.32e-14	2045.78	9.8e-18	1619.36	1.05e-14	1441.35	8.2e-12	1.22045	0.183	NOT	1187.23	7.98e-11	1.72315	0.0865	NOT	1235.91	2.2e-09	1.31026	0.135	NOT	1.16298	0.364	NOT	0.920567	0.238	NOT	0.823693	0.39	NOT	0.857467	0.29	NOT
TU0371	1	+	8233997	8234866			AT1G23205.1		1418.92	5.27e-16	670.988	7.21e-08	535.98	1.21e-06	1028.5	1.39e-09	1.3796	0.0919	NOT	501.356	5.33e-07	1.33835	0.398	NOT	507.906	2.34e-07	1.05527	0.495	NOT	0.472886	0.00569	DIFF	0.377738	0.0228	DIFF	0.487463	0.134	NOT	0.493832	0.224	NOT
TU0372	1	-	8262910	8263412			AT1G23290.1		1780.44	1.77e-16	1669.91	3.33e-16	1190.02	1.09e-13	2542.06	9.78e-16	0.700393	0.0695	NOT	1835.03	9.33e-16	0.910018	0.401	NOT	1861.37	3.04e-17	0.639325	0.0984	NOT	0.93792	0.469	NOT	0.668385	0.181	NOT	0.721867	0.0792	NOT	0.732229	0.136	NOT
TU0373	1	+	8268516	8270597			AT1G23310.1		2088.27	1.11e-15	2247.75	6.93e-13	961.2	3.85e-10	2367.05	1.06e-18	0.882225	0.453	NOT	1723.16	1.77e-15	1.30443	0.369	NOT	1441.23	7.89e-12	0.66693	0.435	NOT	1.07637	0.191	NOT	0.460285	0.0656	NOT	0.727978	0.169	NOT	0.608872	0.048	DIFF
TU0374	1	-	8281891	8282367					1095.22	7.92e-17	2380.62	5.78e-21	916.645	2.27e-15	1132.95	2.97e-17	0.966698	0.297	NOT	2734.85	4.22e-24	0.870476	0.351	NOT	1638.33	9.44e-20	0.5595	0.144	NOT	2.17365	0.0178	NOT	0.836951	0.464	NOT	2.41392	0.00944	DIFF	1.44607	0.177	NOT
TU0375	1	+	8309173	8310620			AT1G23390.1		763.95	3.68e-17	553.046	4.73e-13	358.094	4.9e-09	661.592	1.22e-13	1.15471	0.427	NOT	516.508	8.98e-10	1.07074	0.224	NOT	412.787	5.65e-07	0.867503	0.202	NOT	0.72393	0.25	NOT	0.46874	0.0168	DIFF	0.780705	0.0493	NOT	0.62393	0.0549	DIFF
TU0376	1	-	8350922	8351350			AT1G23550.1		1097.04	0.00956036	824.522	0.000589886	594.104	1.05e-06	688.337	0.00212745	1.59375	0.255	NOT	1239.54	9.2e-09	0.665184	0.223	NOT	1518.94	4.87e-11	0.391131	0.0836	NOT	0.751588	0.483	NOT	0.541552	0.386	NOT	1.80077	0.0857	NOT	2.20668	0.0253	DIFF
TU0377	1	+	8399031	8399705			AT1G23740.1		1404.87	4.95e-12	1226.79	1.21e-11	556.041	8.99e-08	1241.76	3.7e-12	1.13135	0.426	NOT	1041.45	1.12e-07	1.17796	0.147	NOT	748.618	8.13e-09	0.742757	0.435	NOT	0.873241	0.366	NOT	0.395795	0.111	NOT	0.838689	0.11	NOT	0.602869	0.0541	DIFF
TU0378	1	+	8406936	8408587			AT1G23780.1		533.563	1.38e-13	478.535	5.17e-11	495.345	5.42e-12	648.896	5.49e-10	0.822263	0.336	NOT	763.368	2.79e-12	0.626873	0.0752	NOT	593.143	2.22e-17	0.835119	0.118	NOT	0.896867	0.207	NOT	0.928372	0.0891	NOT	1.17641	0.335	NOT	0.91408	0.287	NOT
TU0379	1	-	8433803	8435473			AT1G23870.1		332.7	2.57e-06	567.48	2.69e-11	293.488	1.77e-06	346.48	4.81e-08	0.960229	0.0676	NOT	428.134	3.06e-09	1.32547	0.221	NOT	348.646	3.65e-09	0.841794	0.0841	NOT	1.70568	0.034	NOT	0.88214	0.214	NOT	1.23567	0.416	NOT	1.00625	0.201	NOT
TU0380	1	+	8525563	8527076			AT1G24100.1		296.636	1.87e-08	292.274	9.81e-10	253.488	2.03e-05	419.498	2.19e-12	0.707121	0.122	NOT	334.43	1.15e-05	0.873947	0.2	NOT	266.902	6.13e-06	0.949742	0.111	NOT	0.985295	0.295	NOT	0.854542	0.114	NOT	0.797215	0.189	NOT	0.636241	0.105	NOT
TU0381	1	+	8553403	8555453			AT1G24160.1		546.735	7.38e-10	467.194	4.73e-13	350.776	5.92e-06	513.648	5.49e-10	1.06442	0.474	NOT	387.219	3.22e-06	1.20654	0.097	NOT	325.317	2.69e-06	1.07826	0.5	NOT	0.854516	0.495	NOT	0.641583	0.122	NOT	0.753861	0.112	NOT	0.633346	0.092	NOT
TU0382	1	+	8557458	8558799			AT1G24170.1		699.14	6.81e-11	572.631	9.19e-09	482.334	1.4e-08	484.612	3.39e-07	1.44268	0.395	NOT	620.403	3.49e-16	0.922998	0.0435	NOT	587.908	7.44e-11	0.820424	0.337	NOT	0.819051	0.17	NOT	0.689896	0.297	NOT	1.28021	0.159	NOT	1.21315	0.437	NOT
TU0383	1	+	8608129	8608737			AT1G24270.1		605.228	1.16e-09	248.184	0.00875343	497.972	1.47e-08	507.757	9.6e-08	1.19196	0.258	NOT	382.817	0.00220348	0.64831	0.182	NOT	331.97	1.71e-08	1.50005	0.125	NOT	0.410067	0.000506	DIFF	0.822784	0.183	NOT	0.753937	0.0739	NOT	0.653797	0.0489	DIFF
TU0384	1	+	8686905	8688238			AT1G24510.1		663.747	1.17e-11	647.901	4.45e-13	454.065	6.54e-08	646.106	2.69e-12	1.0273	0.304	NOT	478.777	3.52e-09	1.35324	0.304	NOT	455.449	1.17e-07	0.996961	0.475	NOT	0.976126	0.352	NOT	0.684093	0.0885	NOT	0.741019	0.0901	NOT	0.704914	0.0411	DIFF
TU0385	1	+	8711041	8711515			AT1G24575.1		344.572	0.010832	353.556	0.00357545	359.884	0.000234231	674.008	4.43e-11	0.511228	0.000675	DIFF	840.633	7.5e-10	0.420583	0.000729	DIFF	944.999	3.35e-11	0.38083	0.000977	DIFF	1.02607	0.352	NOT	1.04444	0.133	NOT	1.24722	0.342	NOT	1.40206	0.268	NOT
TU0386	1	-	8753356	8755391			AT1G24706.1		404.015	9.45e-12	352.081	8.01e-12	378.833	3.05e-09	384.085	4.62e-11	1.05189	0.386	NOT	345.116	4.52e-15	1.02018	0.361	NOT	342.149	1.77e-09	1.10722	0.405	NOT	0.871455	0.113	NOT	0.937671	0.147	NOT	0.898541	0.3	NOT	0.890816	0.277	NOT
TU0387	1	-	8756353	8756561					373.559	0.0239713	598.781	0.0175888	9514.36	4.22e-11	396.982	0.0775014	0.940997	0.462	NOT	226.116	0.0775015	2.64811	0.256	NOT	7425.82	4.93e-11	1.28125	0.148	NOT	1.60291	0.398	NOT	25.4695	1.12e-06	DIFF	0.569588	0.2	NOT	18.7057	1.4e-06	DIFF
TU0388	1	+	8840498	8840851			AT1G25230.1		710.088	3.41e-08	299.153	0.000652644	295.124	0.000830538	1077.73	5e-13	0.658874	0.0385	NOT	308.653	0.111758	0.969221	0.452	NOT	435.839	6.73e-05	0.67714	0.225	NOT	0.42129	0.0068	DIFF	0.415616	0.00595	DIFF	0.286392	0.000224	DIFF	0.404405	0.00207	DIFF
TU0389	1	+	8861911	8862646					593.829	0.000154556	564.714	0.000160507	881.31	1.42e-07	993.618	9.03e-09	0.597643	0.0493	NOT	779.257	8.66e-12	0.724683	0.112	NOT	1156.1	3.06e-13	0.762313	0.193	NOT	0.950971	0.397	NOT	1.48411	0.163	NOT	0.784262	0.426	NOT	1.16353	0.412	NOT
TU0390	1	+	8906527	8908858			AT1G25390.1		443.206	1.78e-12	331.647	1.93e-09	296.818	0.000135728	302.217	2.56e-08	1.46652	0.0788	NOT	289.951	1.72e-05	1.1438	0.185	NOT	274.087	1.1e-10	1.08293	0.215	NOT	0.748291	0.0743	NOT	0.669707	0.0372	NOT	0.959413	0.176	NOT	0.906921	0.126	NOT
TU0391	1	+	8911418	8912388			AT1G25400.1		354.646	1.66e-08	317.505	4.17e-06	332.241	0.000262021	264.252	3.09e-05	1.34207	0.271	NOT	509.437	1.4e-10	0.623247	0.0537	NOT	381.29	4.54e-07	0.87136	0.378	NOT	0.895273	0.437	NOT	0.936824	0.348	NOT	1.92785	0.0302	DIFF	1.4429	0.335	NOT
TU0392	1	+	8918914	8919379	AT1G25422	AT1G25422		TU0393	437.242	1.04e-06	526.218	3.77e-07	412.692	1.7e-05	371.412	7.6e-08	1.17724	0.342	NOT	818.977	1.21e-10	0.642531	0.0618	NOT	568.494	9.87e-09	0.725939	0.117	NOT	1.20349	0.484	NOT	0.943853	0.428	NOT	2.20504	0.0324	DIFF	1.53063	0.092	NOT
TU0393	1	-	8919064	8919301				TU0392	17229.7	1.67e-06	13635.6	1.24e-06	18877.1	5.25e-07	17948.8	2.27e-08	0.959936	0.288	NOT	11691.1	8.38e-07	1.16632	0.347	NOT	15958.1	5.25e-10	1.18292	0.459	NOT	0.791401	0.127	NOT	1.09561	0.41	NOT	0.651358	0.362	NOT	0.88909	0.332	NOT
TU0394	1	-	8976440	8977927			AT1G25550.1		1318.71	3.02e-19	1122.46	7.53e-15	572.677	5.64e-09	1696.54	2.82e-16	0.777294	0.133	NOT	675.442	6.15e-12	1.66182	0.253	NOT	316.299	2.35e-06	1.81056	0.0588	NOT	0.85118	0.374	NOT	0.434271	0.147	NOT	0.398129	0.011	DIFF	0.186438	0.000187	DIFF
TU0395	1	+	8981753	8983227			AT1G25560.1		1057.65	9.13e-17	1011.99	7.85e-12	864.038	1.87e-13	1115.39	4.82e-19	0.948233	0.234	NOT	958.995	4.56e-09	1.05526	0.44	NOT	796.258	1.88e-15	1.08512	0.452	NOT	0.956829	0.447	NOT	0.816941	0.304	NOT	0.859784	0.136	NOT	0.713883	0.123	NOT
TU0396	1	+	9041631	9042912			AT1G26150.1		260.938	3.21e-07	221.993	0.061878	322.503	1.56e-09	244.991	5.96e-06	1.06509	0.364	NOT	228.225	0.0055715	0.972694	0.168	NOT	230.595	0.000271648	1.39857	0.106	NOT	0.85075	0.435	NOT	1.23594	0.275	NOT	0.931565	0.189	NOT	0.941239	0.335	NOT
TU0397	1	+	9071975	9073229			AT1G26218.1,AT1G26230.1		448.283	1.55e-09	464.294	3.59e-14	421.363	3.84e-09	356.303	9.31e-10	1.25815	0.236	NOT	277.178	0.000304295	1.67508	0.0149	NOT	308.69	9.01e-09	1.365	0.319	NOT	1.03572	0.436	NOT	0.939949	0.414	NOT	0.777928	0.128	NOT	0.866369	0.451	NOT
TU0398	1	-	9076179	9076430	AT1G26230	AT1G26230			230.667	0.0970884	423.058	8.2e-12	1671.82	1.86e-14	201.893	0.322626	1.14252	0.335	NOT	300.586	0.00357441	1.40744	0.333	NOT	831.776	6.52e-17	2.00994	0.294	NOT	1.83406	0.0157	DIFF	7.24776	0.000281	DIFF	1.48884	0.0392	DIFF	4.11989	0.000184	DIFF
TU0399	1	+	9089442	9091787			AT1G26270.1		493.158	2.94e-14	435.511	3.61e-15	347.191	5.27e-06	432.761	1.31e-10	1.13956	0.349	NOT	432.945	3.06e-09	1.00593	0.355	NOT	380.064	1.39e-11	0.913507	0.207	NOT	0.883106	0.252	NOT	0.704016	0.0533	NOT	1.00043	0.421	NOT	0.878231	0.343	NOT
TU0400	1	+	9167690	9168215			AT1G26540.1		366.052	0.000143425	377.143	6.08e-06	454.061	1.23e-11	475.686	1.33e-07	0.769524	0.0966	NOT	484.087	1.46e-09	0.779081	0.166	NOT	534.234	3.7e-09	0.849929	0.184	NOT	1.0303	0.452	NOT	1.24043	0.19	NOT	1.01766	0.399	NOT	1.12308	0.259	NOT
TU0401	1	-	9186298	9187246			AT1G26580.1		551.603	4.97e-08	633.091	5.52e-11	589.049	2.14e-11	509.14	1.83e-09	1.0834	0.359	NOT	561.261	4.9e-07	1.12798	0.14	NOT	666.807	3.35e-07	0.883388	0.391	NOT	1.14773	0.195	NOT	1.06789	0.359	NOT	1.10237	0.265	NOT	1.30967	0.39	NOT
TU0402	1	+	9195875	9198788			AT1G26620.1		262.887	1.52e-06	331.587	7.54e-14	253.415	3.63e-05	239.5	7.75e-06	1.09765	0.327	NOT	211.184	2.67e-05	1.57013	0.00373	NOT	226.429	1.49e-06	1.11918	0.425	NOT	1.26133	0.151	NOT	0.963969	0.205	NOT	0.88177	0.0901	NOT	0.945424	0.379	NOT
TU0403	1	-	9210839	9211407			AT1G26650.1		510.71	5.28e-05	411.543	1.38e-05	328.694	0.00295928	597.596	6.15e-09	0.854607	0.466	NOT	404.001	0.000190906	1.01867	0.428	NOT	384.47	0.000737389	0.854928	0.411	NOT	0.805825	0.205	NOT	0.643602	0.202	NOT	0.676044	0.28	NOT	0.643361	0.148	NOT
TU0404	1	+	9248361	9251725			AT1G26760.1,AT1G26761.1		328.824	9.74e-14	291.894	1.69e-11	277.726	1.05e-10	373.818	3.36e-12	0.879637	0.12	NOT	260.689	4.21e-09	1.1197	0.333	NOT	249.32	9.45e-13	1.11393	0.156	NOT	0.887691	0.389	NOT	0.844604	0.213	NOT	0.697369	0.0222	DIFF	0.666956	0.00146	DIFF
TU0405	1	+	9285139	9286296			AT1G26800.1		357.208	1.54e-06	308.225	6.17e-08	350.375	2.48e-12	331.719	1.28e-07	1.07684	0.456	NOT	451.877	4.15e-13	0.682099	0.0193	NOT	350.391	1.5e-07	0.999954	0.462	NOT	0.862873	0.38	NOT	0.980871	0.467	NOT	1.36223	0.0247	DIFF	1.05629	0.356	NOT
TU0406	1	+	9301030	9303327			AT1G26850.1		499.631	5.8e-13	423.48	2.63e-10	406.821	4.86e-11	585.718	2.58e-11	0.853023	0.121	NOT	408.093	9.32e-08	1.0377	0.164	NOT	460.771	1.4e-12	0.882914	0.382	NOT	0.847586	0.467	NOT	0.814243	0.433	NOT	0.69674	0.019	DIFF	0.786677	0.139	NOT
TU0407	1	+	9323097	9324262					561.552	2.59e-10	529.033	1.79e-09	544.315	1.85e-08	836.671	1.95e-11	0.671174	0.107	NOT	710.559	1.13e-08	0.744531	0.251	NOT	496.923	5.25e-09	1.09537	0.271	NOT	0.942091	0.466	NOT	0.969305	0.261	NOT	0.849269	0.267	NOT	0.593929	0.0999	NOT
TU0408	1	-	9328683	9330219			AT1G26920.1		1066.91	3.6e-15	1295.73	3.48e-11	1065.27	1.85e-19	1569.17	2.9e-12	0.67992	0.165	NOT	1030.34	1.53e-07	1.25758	0.0613	NOT	553.407	3.3e-08	1.92493	0.0317	NOT	1.21447	0.487	NOT	0.998463	0.402	NOT	0.656615	0.00915	DIFF	0.352675	0.00394	DIFF
TU0409	1	+	9336523	9337416			AT1G26930.1		297.13	4.72e-08	287.383	1.42e-05	287.145	6.48e-06	313.237	1.08e-08	0.948579	0.484	NOT	979.729	3.56e-16	0.293329	0.00531	NOT	284.185	2.19e-06	1.01042	0.499	NOT	0.967196	0.283	NOT	0.966395	0.313	NOT	3.12776	0.0185	DIFF	0.907252	0.298	NOT
TU0410	1	+	9407402	9408877			AT1G27100.1		376.757	3e-08	371.376	1.88e-05	435.422	7.45e-09	396.633	9.03e-09	0.949888	0.282	NOT	466.338	7.47e-09	0.796367	0.323	NOT	351.984	1.59e-06	1.23705	0.371	NOT	0.985718	0.452	NOT	1.15571	0.399	NOT	1.17574	0.41	NOT	0.88743	0.334	NOT
TU0411	1	-	9426281	9426627			AT1G27130.1		1458.25	2.22e-10	1389.09	9.56e-08	1478.74	2.05e-05	931.374	0.000231477	1.5657	0.143	NOT	1860.42	7.57e-05	0.746654	0.464	NOT	1103.63	7.09e-07	1.33989	0.5	NOT	0.952573	0.253	NOT	1.01405	0.159	NOT	1.9975	0.429	NOT	1.18495	0.441	NOT
TU0412	1	+	9455379	9458540			AT1G27210.1		2361.45	5.36e-18	1733.74	8.88e-13	997.366	1.7e-11	2501.42	5.04e-17	0.944044	0.309	NOT	1406.94	8.13e-13	1.23228	0.456	NOT	1278.76	2.75e-14	0.779948	0.216	NOT	0.734185	0.177	NOT	0.422353	0.0193	DIFF	0.562457	0.0697	NOT	0.511214	0.0208	DIFF
TU0413	1	+	9485365	9487757					879.456	2.24e-34	1109.88	4.75e-35	1029.14	1.46e-33	971.758	3.86e-27	0.905015	0.45	NOT	764.27	4.37e-29	1.45221	0.0987	NOT	1104	7.2e-37	0.932192	0.225	NOT	1.26201	0.282	NOT	1.1702	0.342	NOT	0.786482	0.22	NOT	1.13609	0.0974	NOT
TU0414	1	-	9490481	9492485			AT1G27320.1		698.049	6.47e-10	628.597	2.31e-12	487.481	1.59e-08	790.481	2.27e-17	0.883069	0.0969	NOT	706.466	6.44e-07	0.889777	0.436	NOT	412.561	7.09e-07	1.1816	0.247	NOT	0.900506	0.443	NOT	0.698348	0.112	NOT	0.893717	0.0621	NOT	0.521911	0.000862	DIFF
TU0415	1	-	9496526	9497720			AT1G27340.1		376.3	2.01e-06	356.792	1.49e-11	353.592	1.98e-09	404.509	3.93e-09	0.930264	0.454	NOT	400.019	1.77e-07	0.891938	0.279	NOT	408.873	2.05e-10	0.864797	0.268	NOT	0.948158	0.28	NOT	0.939655	0.286	NOT	0.9889	0.466	NOT	1.01079	0.462	NOT
TU0416	1	+	9556148	9556778			AT1G27510.1		283.745	0.000516662	420.005	3.55e-06	299.436	0.000244532	576.027	3.48e-08	0.49259	0.0143	NOT	464.934	3.79e-14	0.903365	0.316	NOT	394.726	8.46e-05	0.758592	0.337	NOT	1.48022	0.186	NOT	1.0553	0.308	NOT	0.807139	0.2	NOT	0.685256	0.106	NOT
TU0417	1	-	9615325	9616178			AT1G27650.1		924.952	6.36e-16	1163.5	1.47e-20	1174.56	7.2e-16	1073.58	2e-15	0.861559	0.432	NOT	1047.74	8.71e-17	1.11049	0.456	NOT	1404	2.26e-18	0.836581	0.431	NOT	1.2579	0.458	NOT	1.26986	0.396	NOT	0.975931	0.431	NOT	1.30777	0.301	NOT
TU0418	1	-	9642864	9643166			AT1G27710.1		9673.25	3.45e-09	5477.62	2.01e-11	8017.65	4.49e-14	10833	3.29e-09	0.892943	0.458	NOT	8246.38	2.65e-11	0.664245	0.17	NOT	5645.33	4.13e-11	1.42023	0.308	NOT	0.566265	0.265	NOT	0.828848	0.413	NOT	0.761228	0.41	NOT	0.521123	0.278	NOT
TU0419	1	-	9666637	9668858			AT1G27752.1		1065.69	1e-08	1103.75	7.31e-09	1514.07	1.8e-08	1756.22	1.32e-17	0.606809	0.054	NOT	2136.22	2.12e-11	0.516684	0.323	NOT	1116.34	9.18e-13	1.35628	0.434	NOT	1.03571	0.431	NOT	1.42074	0.358	NOT	1.21637	0.0834	NOT	0.635649	0.0824	NOT
TU0420	1	-	9740595	9741139			AT1G27950.1		974.386	2.36e-10	667.609	1.91e-07	770.89	3.65e-07	1057.92	3.63e-09	0.921039	0.203	NOT	535.582	1.05e-05	1.24651	0.335	NOT	580.768	4.87e-11	1.32736	0.331	NOT	0.685159	0.176	NOT	0.791155	0.225	NOT	0.506259	0.0854	NOT	0.548972	0.168	NOT
TU0421	1	+	9776839	9777659			AT1G28050.1		474.082	4.17e-08	509.203	4.34e-10	475.773	1.8e-09	540.05	9.75e-11	0.877848	0.201	NOT	463.682	7.19e-12	1.09817	0.487	NOT	331.115	0.000156184	1.43688	0.123	NOT	1.07408	0.393	NOT	1.00357	0.461	NOT	0.858591	0.119	NOT	0.613119	0.0118	DIFF
TU0422	1	-	9781591	9783292			AT1G28060.1,AT1G28070.1		460.46	9.12e-06	548.007	1.85e-09	650.515	2.75e-09	661.671	1.86e-15	0.695905	0.032	NOT	575.555	6.32e-11	0.952137	0.417	NOT	706.471	3.22e-10	0.920795	0.282	NOT	1.19013	0.234	NOT	1.41275	0.234	NOT	0.869851	0.147	NOT	1.06771	0.302	NOT
TU0423	1	+	9843948	9845067					350.024	2.76e-07	408.219	1.42e-11	392.398	1.41e-07	264.42	7.99e-05	1.32374	0.0511	NOT	282.379	4.3e-05	1.44564	0.142	NOT	301.583	2.06e-06	1.30113	0.341	NOT	1.16626	0.498	NOT	1.12106	0.312	NOT	1.06792	0.339	NOT	1.14055	0.229	NOT
TU0424	1	+	9889117	9890828			AT1G28290.1		561.095	4.65e-07	563.62	3.84e-06	672.149	5.8e-11	552.513	3.73e-07	1.01553	0.29	NOT	444.734	9.86e-06	1.26732	0.355	NOT	640.743	1.37e-12	1.04901	0.221	NOT	1.0045	0.31	NOT	1.19792	0.483	NOT	0.804929	0.363	NOT	1.15969	0.124	NOT
TU0425	1	+	9912092	9913696			AT1G28310.1		514.652	3.76e-12	434.608	4.53e-12	385.728	1.95e-09	446.894	1.77e-10	1.15162	0.155	NOT	452.771	1.42e-10	0.959885	0.184	NOT	346.717	3e-07	1.11252	0.224	NOT	0.84447	0.0304	NOT	0.749493	0.0335	DIFF	1.01315	0.46	NOT	0.775837	0.0616	DIFF
TU0426	1	+	9933995	9934272			AT1G28330.1		1825.9	7.92e-09	706.524	0.000175686	895.005	0.00113314	1333.16	1.59e-06	1.3696	0.314	NOT	682.679	0.000496631	1.03493	0.387	NOT	632.868	2.63e-05	1.4142	0.273	NOT	0.386946	0.022	NOT	0.490172	0.0879	NOT	0.512076	0.0901	NOT	0.474713	0.0846	NOT
TU0427	1	+	9966772	9968607			AT1G28390.1		2439.84	3.6e-08	2401.84	7.32e-08	1960.89	8.74e-13	1416.74	1.49e-09	1.72215	0.373	NOT	2164.38	1.49e-12	1.10971	0.489	NOT	1878.27	6.77e-11	1.04399	0.473	NOT	0.984425	0.382	NOT	0.803696	0.375	NOT	1.52772	0.444	NOT	1.32577	0.486	NOT
TU0428	1	+	9972669	9975082			AT1G28400.1		1470.5	1.64e-34	1540.98	2.34e-28	1367.89	3.48e-24	2257.43	8.5e-33	0.651404	0.0351	NOT	1421.7	2.16e-14	1.0839	0.0334	NOT	1554.28	5.44e-30	0.88008	0.257	NOT	1.04793	0.39	NOT	0.930221	0.258	NOT	0.629787	0.00014	DIFF	0.688517	0.0357	DIFF
TU0429	1	-	9999705	10000301			AT1G28440.1		1540.46	8.51e-09	1149.9	6.82e-12	574.173	8.2e-12	1511.13	5.9e-12	1.01941	0.203	NOT	854.126	2.77e-15	1.34629	0.193	NOT	471.865	3.45e-08	1.21682	0.308	NOT	0.746465	0.44	NOT	0.372728	0.122	NOT	0.565223	0.038	DIFF	0.31226	0.00137	DIFF
TU0430	1	-	10030574	10031562			AT1G28520.1		582.323	1.17e-12	729.255	1.69e-11	576.532	1e-13	706.8	2.19e-09	0.823887	0.482	NOT	636.578	7.61e-10	1.14559	0.154	NOT	808.194	4.19e-18	0.713358	0.14	NOT	1.25232	0.383	NOT	0.990055	0.492	NOT	0.900648	0.145	NOT	1.14346	0.214	NOT
TU0431	1	-	10055733	10057702					614.523	8.89e-11	378.49	1.59e-05	337.152	5.43e-08	432.566	7.17e-11	1.42065	0.171	NOT	376.033	2.16e-05	1.00653	0.497	NOT	450.35	1.36e-09	0.748644	0.262	NOT	0.615909	0.0189	NOT	0.54864	0.0134	DIFF	0.869308	0.124	NOT	1.04111	0.247	NOT
TU0432	1	-	10096038	10097020			AT1G28815.1,AT1G28820.1		701.432	2.22e-10	655.018	2.01e-07	627.68	1.03e-11	703.391	1.52e-06	0.997215	0.481	NOT	493.36	1.88e-05	1.32767	0.106	NOT	656.386	1.15e-12	0.956267	0.444	NOT	0.93383	0.451	NOT	0.894855	0.494	NOT	0.701402	0.195	NOT	0.933174	0.442	NOT
TU0433	1	-	10098080	10102867			AT1G28870.1,AT1G28880.1,AT1G28890.1,AT1G28900.1,AT1G28910.1,AT1G28920.1		878.932	1.73e-08	1155.06	9.17e-09	1111.84	3.26e-06	1140.48	4.44e-11	0.770668	0.00922	NOT	1099.4	6.56e-07	1.05063	0.348	NOT	1474.37	3.78e-11	0.754112	0.0279	NOT	1.31416	0.185	NOT	1.26499	0.337	NOT	0.96398	0.0523	NOT	1.29276	0.351	NOT
TU0434	1	+	10109855	10110352			AT1G28960.1		435.096	6.09e-06	646.616	1.86e-07	393.083	6.48e-06	294.62	0.0348346	1.4768	0.151	NOT	732.271	1.16e-07	0.883028	0.489	NOT	699.009	3.35e-11	0.562343	0.116	NOT	1.48615	0.0962	NOT	0.90344	0.478	NOT	2.48548	0.0215	DIFF	2.37258	0.0125	DIFF
TU0435	1	-	10135539	10135930			AT1G29040.1		1340.99	4.65e-09	1229.7	1.15e-09	2257.87	2.85e-09	1779.99	2.93e-06	0.753369	0.385	NOT	1015.67	2.27e-07	1.21073	0.269	NOT	1441.27	4.07e-10	1.56658	0.339	NOT	0.917009	0.45	NOT	1.68373	0.454	NOT	0.570604	0.362	NOT	0.809707	0.486	NOT
TU0436	1	-	10150899	10151365			AT1G29070.1		2018.82	1.05e-10	1046.88	1.36e-08	1556.03	4.21e-08	1172.53	3.63e-12	1.72176	0.323	NOT	1202.41	1.02e-06	0.870651	0.246	NOT	1210.9	2.63e-07	1.28502	0.44	NOT	0.51856	0.284	NOT	0.770762	0.135	NOT	1.02548	0.21	NOT	1.03272	0.366	NOT
TU0437	1	+	10157520	10157990			AT1G29080.1		670.111	0.00035397	723.535	4.9e-05	728.035	0.00603221	457.157	0.00403176	1.46582	0.28	NOT	800.529	1.82e-10	0.903821	0.299	NOT	638.273	0.00018788	1.14063	0.312	NOT	1.07972	0.427	NOT	1.08644	0.315	NOT	1.7511	0.106	NOT	1.39618	0.24	NOT
TU0438	1	-	10171506	10173047			AT1G29110.1		1026.54	2.2e-13	660.567	2.81e-09	752.377	1.22e-13	874.785	3.26e-11	1.17348	0.15	NOT	409.803	6.66e-10	1.61191	0.256	NOT	601.394	3.04e-11	1.25106	0.258	NOT	0.643489	0.0146	DIFF	0.732925	0.127	NOT	0.468461	0.0165	DIFF	0.687476	0.189	NOT
TU0439	1	-	10181270	10182571			AT1G29150.1		300.672	0.000107192	501.469	7.42e-12	338.484	4.86e-06	358.559	1.57e-05	0.838557	0.246	NOT	503.943	7.8e-10	0.995091	0.451	NOT	395.453	2.61e-05	0.85594	0.19	NOT	1.66783	0.0299	NOT	1.12576	0.437	NOT	1.40547	0.0897	NOT	1.1029	0.343	NOT
TU0440	1	-	10236328	10237558			AT1G29280.1		827.721	4.48e-05	774.928	2.43e-12	889.819	1.54e-15	1071.46	1.06e-13	0.772517	0.151	NOT	469.718	2.19e-06	1.64977	0.0579	NOT	793.353	7.46e-10	1.12159	0.207	NOT	0.936219	0.357	NOT	1.07502	0.0898	NOT	0.438391	0.015	DIFF	0.740441	0.318	NOT
TU0441	1	-	10265498	10266653			AT1G29340.1		692.827	5.78e-20	690.081	8.91e-19	536.615	4.88e-18	558.024	1.7e-12	1.24157	0.223	NOT	958.45	6.75e-18	0.719997	0.139	NOT	529.908	1.22e-20	1.01266	0.346	NOT	0.996037	0.415	NOT	0.77453	0.129	NOT	1.71758	0.0294	DIFF	0.949615	0.492	NOT
TU0442	1	+	10290584	10293714			AT1G29400.1		604.777	9.25e-17	378.017	6.87e-10	374.567	1.46e-15	531.571	3.05e-21	1.13772	0.253	NOT	328.095	1.75e-09	1.15216	0.302	NOT	361.12	1.4e-12	1.03724	0.441	NOT	0.625052	0.004	DIFF	0.619347	0.00603	DIFF	0.617218	0.00619	DIFF	0.679345	0.0208	DIFF
TU0443	1	+	10300151	10300712					1464.77	1.72e-10	1392.48	1.96e-12	3336.8	1.56e-23	830.573	4.14e-09	1.76357	0.324	NOT	592.643	1.16e-11	2.34961	0.218	NOT	2951.8	3.25e-25	1.13043	0.428	NOT	0.950648	0.149	NOT	2.27804	0.00179	DIFF	0.713535	0.259	NOT	3.55393	7.37e-05	DIFF
TU0444	1	-	10308734	10309204			AT1G29465.1		645.385	0.000659934	1688.7	2.05e-11	4510.77	1.82e-18	583.849	2.25e-06	1.1054	0.424	NOT	884.604	1.61e-05	1.90899	0.0544	NOT	2552.86	1.59e-12	1.76695	0.21	NOT	2.61658	0.0274	NOT	6.98927	0.00104	DIFF	1.51512	0.196	NOT	4.37247	0.00509	DIFF
TU0445	1	+	10310369	10310908			AT1G29470.1		1394.76	7.65e-15	2301.33	9.35e-17	1203.93	9.54e-12	1204.95	2.82e-10	1.15753	0.42	NOT	2040.48	1.3e-15	1.12784	0.46	NOT	917.17	4.37e-06	1.31266	0.212	NOT	1.64998	0.0898	NOT	0.863181	0.275	NOT	1.69341	0.0455	DIFF	0.761169	0.0551	DIFF
TU0446	1	+	10312442	10313263			AT1G29470.1		820.68	3.68e-17	1072.61	1.5e-20	485.848	3.43e-10	594.317	5.49e-10	1.38088	0.16	NOT	903.952	1.58e-22	1.18658	0.249	NOT	586.497	4.9e-10	0.82839	0.476	NOT	1.30698	0.0798	NOT	0.592007	0.119	NOT	1.52099	0.0552	NOT	0.986842	0.459	NOT
TU0447	1	-	10372958	10373623			AT1G29660.1		1551.86	4.15e-12	551.314	1.13e-07	546.583	5.16e-05	1460.82	8.14e-11	1.06232	0.358	NOT	659.459	0.00133523	0.83601	0.29	NOT	292.512	0.0240668	1.86858	0.0762	NOT	0.35526	0.00489	DIFF	0.352212	0.00994	DIFF	0.451431	0.00377	DIFF	0.200238	0.000396	DIFF
TU0448	1	+	10459652	10460379			AT1G29880.1		546.552	4.1e-09	741.568	1.31e-16	696.23	1.04e-06	652.657	1.83e-13	0.837426	0.148	NOT	622.108	4.09e-10	1.19202	0.343	NOT	260.61	0.000609553	2.67154	0.166	NOT	1.35681	0.475	NOT	1.27386	0.382	NOT	0.953193	0.0789	NOT	0.399306	0.0052	DIFF
TU0449	1	-	10467166	10471927			AT1G29900.1		361.156	9.72e-13	351.926	2.44e-09	347.647	1.93e-09	454.298	3.64e-14	0.794976	0.0515	NOT	347.955	4.32e-11	1.01141	0.496	NOT	368.562	1.7e-07	0.943252	0.333	NOT	0.974443	0.323	NOT	0.962595	0.399	NOT	0.765918	0.0211	DIFF	0.811278	0.0559	DIFF
TU0450	1	+	10472297	10473331			AT1G29910.1		883.366	1.19e-12	810.191	1.34e-16	842.999	4.53e-13	702.447	1.31e-11	1.25756	0.385	NOT	961.582	6.77e-12	0.84256	0.358	NOT	1155.56	8.62e-19	0.729516	0.347	NOT	0.917163	0.332	NOT	0.954303	0.397	NOT	1.3689	0.413	NOT	1.64505	0.437	NOT
TU0451	1	-	10477961	10478923			AT1G29930.1		1741.86	1.04e-12	1962.75	1.61e-12	1456.49	2.72e-13	1719.48	1.48e-11	1.01302	0.363	NOT	2043.87	2.16e-12	0.960311	0.345	NOT	1161.79	1.54e-11	1.25366	0.377	NOT	1.12681	0.343	NOT	0.836169	0.277	NOT	1.18866	0.312	NOT	0.675664	0.246	NOT
TU0452	1	+	10501241	10502118			AT1G29970.1		279.232	0.000101864	481.977	1.2e-09	272.603	0.0235744	280.78	0.014891	0.994487	0.332	NOT	228.937	0.0313717	2.10528	0.00615	NOT	275.943	0.00375418	0.987896	0.181	NOT	1.72608	0.119	NOT	0.97626	0.413	NOT	0.815361	0.116	NOT	0.982773	0.246	NOT
TU0453	1	+	10546623	10547369			AT1G30070.1		213.408	0.0477434	625.71	3.53e-12	317.642	9.53e-06	209.859	0.00917036	1.01691	0.395	NOT	1395.24	1.06e-19	0.44846	0.0262	NOT	531.111	6.33e-11	0.598071	0.103	NOT	2.93199	0.00256	DIFF	1.48843	0.0254	DIFF	6.64846	9.91e-06	DIFF	2.5308	0.00158	DIFF
TU0454	1	+	10584336	10585228			AT1G30120.1		446.222	1.08e-09	682.606	2.79e-10	360.525	4.36e-06	1061.53	1.53e-17	0.420357	0.0582	NOT	465.188	7.37e-12	1.46738	0.417	NOT	336.81	5.47e-05	1.07041	0.488	NOT	1.52975	0.285	NOT	0.80795	0.0553	NOT	0.438224	0.109	NOT	0.317287	0.00126	DIFF
TU0455	1	-	10640142	10640843			AT1G30230.1		4245.07	7.03e-14	6808.33	1.35e-07	9453.99	5.78e-10	2763.58	3.22e-12	1.53608	0.201	NOT	4798.39	1.67e-12	1.41888	0.402	NOT	7460.88	4.3e-13	1.26714	0.433	NOT	1.60382	0.402	NOT	2.22705	0.221	NOT	1.73629	0.45	NOT	2.69972	0.463	NOT
TU0456	1	-	10667322	10672843	AT1G30290	AT1G30290			590.789	1.95e-18	386.375	2.38e-11	473.972	1.12e-14	714.083	2.92e-16	0.827339	0.481	NOT	491.196	8.31e-12	0.7866	0.122	NOT	612.033	1.03e-15	0.774422	0.391	NOT	0.653998	0.00773	DIFF	0.80227	0.243	NOT	0.68787	0.104	NOT	0.857089	0.384	NOT
TU0457	1	-	10717164	10718775			AT1G30360.1		517.544	3.05e-09	417.376	2.33e-08	290.876	2.02e-05	541.216	1.83e-09	0.956261	0.184	NOT	397.2	2.28e-13	1.0508	0.46	NOT	287.148	1.6e-17	1.01298	0.251	NOT	0.806455	0.158	NOT	0.562031	0.000892	DIFF	0.733903	0.0175	DIFF	0.530561	0.000187	DIFF
TU0458	1	-	10733796	10734578			AT1G30400.1		287.203	0.00912644	335.423	0.00551164	914.192	6.17e-10	385.467	0.00133523	0.745078	0.195	NOT	294.929	0.000995665	1.1373	0.294	NOT	472.461	0.00830296	1.93496	0.0606	NOT	1.1679	0.428	NOT	3.18309	0.0231	DIFF	0.765121	0.332	NOT	1.22568	0.315	NOT
TU0459	1	-	10735381	10737781			AT1G30400.1		554.608	1.35e-11	454.714	9.69e-12	360.976	1.53e-10	612.722	6.69e-17	0.905154	0.1	NOT	338.476	2.94e-08	1.34342	0.0169	NOT	316.531	4.02e-05	1.14041	0.493	NOT	0.819884	0.218	NOT	0.650867	0.00276	DIFF	0.552414	5.06e-05	DIFF	0.516598	3.37e-05	DIFF
TU0460	1	+	10758974	10759451					2569.23	5.54e-15	1464.17	1.79e-10	1771.35	1.88e-14	1854.85	5.52e-15	1.38514	0.253	NOT	1024.2	7.22e-09	1.42957	0.138	NOT	1376.59	1.45e-13	1.28677	0.372	NOT	0.569887	0.0292	NOT	0.689448	0.0445	NOT	0.552174	0.0123	DIFF	0.742157	0.157	NOT
TU0461	1	-	10760210	10762330			AT1G30440.1		545.367	2.15e-13	448.787	4.45e-12	343.103	2.78e-07	562.244	1.21e-12	0.969983	0.468	NOT	374.402	6.82e-11	1.19868	0.0373	NOT	347.628	2.49e-15	0.986983	0.485	NOT	0.822908	0.248	NOT	0.629123	0.022	DIFF	0.665907	0.00819	DIFF	0.618287	0.0151	DIFF
TU0462	1	-	10790354	10791043			AT1G30480.1		1276.12	5.17e-08	859.057	2.88e-06	600.235	2.78e-07	1253.56	9.3e-08	1.018	0.394	NOT	1057.2	1.5e-10	0.812578	0.165	NOT	1012.16	2.37e-07	0.593024	0.405	NOT	0.673179	0.494	NOT	0.470359	0.329	NOT	0.843358	0.293	NOT	0.807428	0.168	NOT
TU0463	1	+	10807106	10808376			AT1G30510.1		477.72	2.13e-07	343.058	0.0002343	383.8	6.67e-09	624.728	3.7e-12	0.764685	0.0585	NOT	334.622	3.31e-11	1.02521	0.271	NOT	335.299	0.000237355	1.14465	0.199	NOT	0.718115	0.086	NOT	0.803399	0.229	NOT	0.535628	0.00229	DIFF	0.536712	0.000343	DIFF
TU0464	1	+	10828453	10828907					615.122	1.24e-19	644.875	4.69e-17	823.905	1.97e-16	560.748	4.13e-19	1.09697	0.38	NOT	637.491	4.53e-15	1.01158	0.331	NOT	704.996	2.88e-13	1.16867	0.195	NOT	1.04837	0.346	NOT	1.33942	0.342	NOT	1.13686	0.385	NOT	1.25724	0.33	NOT
TU0465	1	-	10888253	10890091			AT1G30690.1		450.081	2.75e-10	572.26	4.2e-11	657.509	2.13e-14	672.988	1.41e-16	0.66878	0.106	NOT	526.695	2.28e-12	1.08651	0.282	NOT	438.028	2.01e-12	1.50107	0.109	NOT	1.27146	0.145	NOT	1.46087	0.0714	NOT	0.782622	0.235	NOT	0.65087	0.187	NOT
TU0466	1	-	10966974	10968100			AT1G30835.1		763.37	1.92e-08	756.893	5.32e-12	563.365	1.82e-07	693.28	8.19e-09	1.1011	0.422	NOT	518.893	2.56e-06	1.45867	0.0987	NOT	389.268	5.26e-09	1.44724	0.423	NOT	0.991515	0.37	NOT	0.737997	0.402	NOT	0.748461	0.111	NOT	0.561487	0.414	NOT
TU0467	1	-	11021967	11024343					731.395	1.17e-13	722.847	9.96e-19	614.558	1.05e-15	806.934	9.7e-20	0.906388	0.218	NOT	869.562	7.47e-22	0.831277	0.146	NOT	754.691	6.99e-29	0.814317	0.0567	NOT	0.988313	0.34	NOT	0.840255	0.0985	NOT	1.07761	0.497	NOT	0.935257	0.331	NOT
TU0468	1	-	11036031	11037417			AT1G30950.1		554.549	8.05e-12	328.147	1.02e-13	439.591	2.19e-13	440.77	1.38e-12	1.25814	0.256	NOT	408.416	5.36e-14	0.803463	0.359	NOT	336.737	4.15e-16	1.30544	0.204	NOT	0.591737	0.113	NOT	0.7927	0.235	NOT	0.926597	0.424	NOT	0.763974	0.15	NOT
TU0469	1	+	11064578	11065492			AT1G31030.1		342.025	0.000976561	417.79	0.000111892	547.188	3.53e-09	316.951	0.0102101	1.07911	0.296	NOT	382.361	3.94e-09	1.09266	0.308	NOT	423.42	0.000480369	1.29231	0.221	NOT	1.22152	0.235	NOT	1.59985	0.206	NOT	1.20637	0.258	NOT	1.33592	0.262	NOT
TU0470	1	-	11076749	11077897	AT1G31050	AT1G31050			872.873	3.12e-09	341.895	3.73e-07	323.842	0.034786	647.565	1.69e-14	1.34793	0.139	NOT	329.173	0.0145779	1.03865	0.147	NOT	403.199	0.000728571	0.803182	0.142	NOT	0.391689	0.00058	DIFF	0.371007	6.07e-05	DIFF	0.508324	0.000591	DIFF	0.622639	0.0143	DIFF
TU0471	1	+	11102248	11103546					3322.66	4.63e-09	2449.68	1.11e-14	3651.37	2.8e-19	4056.34	5.57e-13	0.819128	0.2	NOT	3766.33	2.62e-13	0.650416	0.103	NOT	3476.28	7.76e-10	1.05037	0.374	NOT	0.737265	0.396	NOT	1.09893	0.304	NOT	0.928505	0.472	NOT	0.856999	0.284	NOT
TU0472	1	-	11156726	11157426			AT1G31220.1		378.304	4.11e-07	348.608	1.05e-06	495.653	6.46e-10	520.287	8.11e-07	0.727106	0.107	NOT	204.606	0.0257911	1.7038	0.0647	NOT	483.629	7.09e-07	1.02486	0.323	NOT	0.921502	0.47	NOT	1.3102	0.161	NOT	0.393256	0.00121	DIFF	0.929543	0.245	NOT
TU0473	1	+	11214853	11217545			AT1G31330.1,AT1G31335.1		1056.63	1.11e-13	1393.86	2.95e-17	960.069	7.57e-15	719.467	8.48e-16	1.46863	0.18	NOT	1782.48	5e-17	0.781978	0.0682	NOT	1450.64	5.52e-18	0.661824	0.0113	NOT	1.31916	0.272	NOT	0.908614	0.361	NOT	2.4775	0.00408	DIFF	2.01627	0.00219	DIFF
TU0474	1	+	11221349	11222793			AT1G31350.1		423.915	1.58e-11	497.594	1.73e-16	416.641	4.55e-16	527.928	5e-13	0.802979	0.236	NOT	398.327	4.47e-13	1.24921	0.112	NOT	326.176	5.76e-12	1.27735	0.437	NOT	1.17381	0.458	NOT	0.982841	0.242	NOT	0.75451	0.0414	DIFF	0.617842	0.074	NOT
TU0475	1	+	11228853	11229907					27651.5	2.5e-10	30924.7	5.6e-10	25248.6	3.15e-10	30342.2	2.21e-11	0.911322	0.247	NOT	33013.9	2.02e-11	0.936718	0.209	NOT	40584.8	1.02e-13	0.62212	0.0465	NOT	1.11837	0.362	NOT	0.913101	0.492	NOT	1.08805	0.475	NOT	1.33757	0.186	NOT
TU0476	1	-	11250325	11251137			AT1G31420.1		504.782	8.9e-07	1025.99	7.76e-12	776.264	8.75e-06	610.653	1.11e-05	0.826627	0.441	NOT	722.708	4.99e-07	1.41965	0.106	NOT	654.726	1.4e-07	1.18563	0.394	NOT	2.03254	0.084	NOT	1.53782	0.465	NOT	1.1835	0.421	NOT	1.07217	0.324	NOT
TU0477	1	-	11252399	11253621			AT1G31420.1		1428.27	2.48e-07	1592.44	3.46e-10	1103.82	3.37e-09	1003.99	6.95e-09	1.42259	0.253	NOT	2198.51	9.06e-10	0.724327	0.192	NOT	1538.36	1.61e-10	0.71753	0.103	NOT	1.11494	0.29	NOT	0.772837	0.329	NOT	2.18977	0.0214	DIFF	1.53225	0.05	DIFF
TU0478	1	+	11288826	11290110					1160.52	6.92e-09	1073.36	2.81e-09	913.429	2.19e-09	997.219	7.16e-09	1.16376	0.493	NOT	924.362	3.2e-08	1.16119	0.239	NOT	728.912	1.05e-05	1.25314	0.284	NOT	0.924896	0.281	NOT	0.787086	0.44	NOT	0.92694	0.425	NOT	0.730945	0.2	NOT
TU0479	1	-	11363035	11364094			AT1G31730.1		352.355	4.42e-11	316.627	1.8e-05	399.963	5.62e-10	498.177	2.4e-11	0.707289	0.0211	NOT	516.142	6.35e-08	0.613449	0.0179	NOT	260.507	7.72e-08	1.53533	0.154	NOT	0.898602	0.317	NOT	1.13511	0.231	NOT	1.03606	0.347	NOT	0.522921	0.015	DIFF
TU0480	1	-	11454238	11455052					2173.52	1.32e-16	2860.57	1.26e-18	4115.22	3.27e-16	2313.18	1.28e-17	0.939624	0.454	NOT	3281.89	6.27e-17	0.871623	0.446	NOT	5790.96	1.46e-21	0.710628	0.187	NOT	1.3161	0.411	NOT	1.89334	0.268	NOT	1.41878	0.486	NOT	2.50346	0.0656	DIFF
TU0481	1	-	11465719	11466696			AT1G31930.1		293.275	2.02e-07	413.797	3.29e-12	366.669	3.29e-08	264.71	8.56e-06	1.10791	0.244	NOT	321.287	7.9e-06	1.28794	0.15	NOT	219.278	2.61e-05	1.67217	0.239	NOT	1.41095	0.164	NOT	1.25026	0.369	NOT	1.21373	0.306	NOT	0.828371	0.391	NOT
TU0482	1	-	11475811	11478767			AT1G31950.1		464.57	9.76e-08	508.179	7.86e-13	775.875	2.04e-15	527.548	7.58e-08	0.880621	0.42	NOT	429.188	7.03e-09	1.18405	0.265	NOT	641.277	6.37e-15	1.20989	0.359	NOT	1.09387	0.494	NOT	1.67009	0.0877	NOT	0.813553	0.349	NOT	1.21558	0.173	NOT
TU0483	1	-	11531931	11533022			AT1G32060.1		1625.83	3.69e-19	1705.54	7.63e-19	958.58	5.94e-16	2155.56	5.82e-26	0.754249	0.101	NOT	1421.33	3.66e-14	1.19996	0.368	NOT	993.153	1.21e-12	0.965189	0.485	NOT	1.04903	0.424	NOT	0.589594	0.0771	NOT	0.659379	0.0324	DIFF	0.46074	0.0026	DIFF
TU0484	1	-	11534149	11534595			AT1G32060.1		3667.34	1.02e-31	3530.33	3.95e-19	2297.76	8.26e-25	6207.57	5.52e-25	0.590785	0.44	NOT	3622.87	2.3e-20	0.974457	0.482	NOT	1830.12	1.73e-25	1.25552	0.435	NOT	0.96264	0.251	NOT	0.626547	0.182	NOT	0.583621	0.178	NOT	0.294821	0.0909	NOT
TU0485	1	+	11537450	11541260			AT1G32080.1		558.842	6.01e-11	362.249	0.00180056	314.865	5.29e-06	619.273	6.6e-11	0.902416	0.26	NOT	445.156	5.27e-07	0.813757	0.0974	NOT	357.098	3.85e-08	0.881733	0.164	NOT	0.648214	0.0552	NOT	0.563424	0.0754	NOT	0.718836	0.167	NOT	0.576641	0.078	NOT
TU0486	1	-	11552723	11556478			AT1G32120.1		456.08	1.53e-19	287.747	9.02e-09	291.618	1.48e-06	420.475	9.2e-12	1.08468	0.187	NOT	338.338	2.14e-09	0.850472	0.07	NOT	269.018	1.94e-09	1.08401	0.357	NOT	0.630913	0.00093	DIFF	0.639401	0.00194	DIFF	0.804657	0.209	NOT	0.639795	0.00667	DIFF
TU0487	1	-	11567476	11570235			AT1G32150.1,AT1G32160.1		312.202	1.37e-09	257.284	1.83e-09	230.938	2.8e-05	344.805	1.2e-12	0.905445	0.464	NOT	346.07	2.41e-05	0.743445	0.235	NOT	205.173	5.04e-06	1.12558	0.0985	NOT	0.824095	0.026	NOT	0.739707	0.0387	NOT	1.00367	0.112	NOT	0.595041	0.00123	DIFF
TU0488	1	-	11613327	11617403			AT1G32230.1		879.004	5.29e-19	1839.53	1.71e-30	744.672	1.27e-13	1050.27	5.36e-24	0.836931	0.123	NOT	3286.18	6.56e-46	0.559778	0.00642	NOT	787.583	6.26e-17	0.945516	0.0357	NOT	2.09274	0.00339	DIFF	0.847177	0.0368	NOT	3.12889	1.13e-05	DIFF	0.749886	0.062	DIFF
TU0489	1	+	11616380	11617489					262.302	1.51e-05	2057.42	1.52e-24	345.424	2.32e-08	234.119	1.04e-05	1.12038	0.238	NOT	5810.47	6.41e-41	0.354088	1.12e-05	DIFF	1086.25	9.89e-26	0.317997	6.8e-07	DIFF	7.84371	1.11e-08	DIFF	1.31689	0.214	NOT	24.8184	0	DIFF	4.63973	2.15e-09	DIFF
TU0490	1	+	11650172	11650587			AT1G32290.1		2798.55	3.98e-12	2362.51	9.93e-12	3549.64	1.73e-12	2632.28	1.13e-12	1.06317	0.406	NOT	3245.13	4.6e-15	0.728017	0.0772	NOT	2195.99	1.36e-13	1.61642	0.0387	NOT	0.844191	0.372	NOT	1.26839	0.19	NOT	1.23282	0.215	NOT	0.834254	0.211	NOT
TU0491	1	+	11665445	11666209			AT1G32340.1		325.089	1.24e-06	290.387	9.05e-05	308.369	5.28e-06	281.666	0.00090437	1.15416	0.335	NOT	457.77	3.16e-15	0.634351	0.151	NOT	239.865	0.000122835	1.28559	0.451	NOT	0.893254	0.343	NOT	0.948568	0.209	NOT	1.62522	0.117	NOT	0.851594	0.383	NOT
TU0492	1	+	11684796	11684996					1365.53	3.41e-08	1751.16	1.14e-10	4289.4	4.02e-17	921.096	1.22e-08	1.48251	0.102	NOT	710.719	5.73e-06	2.46393	0.012	NOT	3773.1	2.91e-13	1.13684	0.5	NOT	1.2824	0.365	NOT	3.1412	0.263	NOT	0.771601	0.279	NOT	4.09632	0.0388	DIFF
TU0493	1	-	11738797	11739147			AT1G32460.1		936.153	3.41e-16	538.713	8.18e-13	538.416	9.18e-13	967.583	4.01e-20	0.967517	0.47	NOT	890.896	1.18e-16	0.604687	0.0914	NOT	575.842	6.93e-18	0.935006	0.106	NOT	0.575454	0.0566	NOT	0.575137	0.0156	DIFF	0.920744	0.424	NOT	0.595134	0.164	NOT
TU0494	1	+	11739461	11740355			AT1G32470.1		475.811	2.07e-13	356.597	2.13e-09	387.233	2.63e-08	376.889	8.19e-10	1.26247	0.189	NOT	414.984	1.14e-11	0.859303	0.376	NOT	390.287	1.64e-08	0.992175	0.228	NOT	0.749451	0.0724	NOT	0.813838	0.0943	NOT	1.10108	0.449	NOT	1.03555	0.393	NOT
TU0495	1	+	11786033	11786680	AT1G32583	AT1G32583			2565.51	1.07e-11	1402.92	2.92e-10	3526.94	3.12e-12	867.495	0.000150458	2.95738	0.000732	DIFF	1420.98	3.19e-14	0.98729	0.412	NOT	2432.29	2.07e-18	1.45005	0.329	NOT	0.546839	0.0683	NOT	1.37475	0.269	NOT	1.63803	0.175	NOT	2.80381	0.0018	DIFF
TU0496	1	+	11799047	11801212			AT1G32640.1		405.127	1.52e-12	535.825	2.58e-17	400.718	8.26e-15	532.253	7.51e-25	0.761155	0.202	NOT	706.376	6.7e-17	0.758555	0.109	NOT	521.198	1.41e-20	0.76884	0.179	NOT	1.32261	0.14	NOT	0.989117	0.302	NOT	1.32714	0.0808	NOT	0.97923	0.407	NOT
TU0497	1	-	11829205	11829716			AT1G32700.1		1054.05	8.51e-09	1562.22	6.2e-11	487.411	1.23e-08	1346.54	3.45e-07	0.782784	0.253	NOT	1288.29	7.46e-13	1.21263	0.486	NOT	616.123	1.59e-06	0.791094	0.191	NOT	1.48211	0.118	NOT	0.462417	0.0331	DIFF	0.956741	0.32	NOT	0.45756	0.0327	DIFF
TU0498	1	-	11845188	11846070			AT1G32740.1		814.884	4.5e-12	816.103	1.82e-12	1071.18	1.54e-14	1144.38	7.91e-12	0.712075	0.41	NOT	1328.37	5.61e-14	0.614364	0.396	NOT	983.77	2.2e-10	1.08885	0.45	NOT	1.0015	0.266	NOT	1.31452	0.478	NOT	1.16078	0.496	NOT	0.859653	0.369	NOT
TU0499	1	-	11858041	11858977			AT1G32760.1		313.876	5.58e-05	336.462	6.84e-07	409.69	1.85e-08	338.612	0.000100207	0.926949	0.462	NOT	1006.21	1.43e-12	0.334385	0.0186	NOT	572.704	3.55e-09	0.715361	0.29	NOT	1.07196	0.487	NOT	1.30526	0.459	NOT	2.97157	0.0298	DIFF	1.69133	0.27	NOT
TU0500	1	+	11881408	11881754					1686.57	1.12e-07	1784.22	3.38e-19	1737.63	4.43e-16	1849.32	1.07e-14	0.911995	0.179	NOT	1831.1	9.3e-16	0.974398	0.45	NOT	1591.54	1.04e-13	1.09179	0.295	NOT	1.0579	0.285	NOT	1.03027	0.487	NOT	0.990148	0.4	NOT	0.860608	0.4	NOT
TU0501	1	-	11882012	11885845			AT1G32810.2		270.087	1.57e-11	306.805	2.24e-09	262.885	4.02e-06	301.271	1.14e-09	0.896492	0.454	NOT	292.148	2.32e-10	1.05017	0.121	NOT	264.485	6.31e-07	0.993951	0.27	NOT	1.13595	0.257	NOT	0.973335	0.0898	NOT	0.969718	0.279	NOT	0.877897	0.221	NOT
TU0502	1	-	11912627	11913149			AT1G32870.1		544.935	2.1e-06	1160.34	2e-15	551.55	4.57e-08	647.817	5.39e-07	0.841187	0.374	NOT	2392.31	1.39e-18	0.485029	0.131	NOT	743.162	2.09e-12	0.742167	0.267	NOT	2.12932	0.00496	DIFF	1.01214	0.377	NOT	3.69288	0.00512	DIFF	1.14718	0.294	NOT
TU0503	1	-	11956894	11957222			AT1G32990.1		1588.3	9.6e-05	807.368	3.05e-10	889.934	1.62e-05	1247.86	9.2e-05	1.27282	0.269	NOT	969.944	6.04e-05	0.832386	0.323	NOT	959.943	2.15e-06	0.92707	0.374	NOT	0.508322	0.0692	NOT	0.560306	0.0437	NOT	0.777286	0.0855	NOT	0.769271	0.149	NOT
TU0504	1	-	11967103	11967710			AT1G33040.1		851.306	2.93e-14	719.783	1.7e-08	739.744	6.24e-10	766.308	1.5e-09	1.11092	0.189	NOT	584.574	2.05e-11	1.23129	0.43	NOT	659.672	2.13e-11	1.12138	0.405	NOT	0.845504	0.0654	NOT	0.868952	0.06	NOT	0.762845	0.27	NOT	0.860844	0.319	NOT
TU0505	1	-	12018652	12019387			AT1G33135.1		5139.8	4.25e-12	5069.65	1e-09	5088.84	2.29e-11	4249.02	5.03e-10	1.20964	0.135	NOT	4755.08	8.38e-10	1.06615	0.379	NOT	4291.07	2.16e-10	1.18591	0.379	NOT	0.986352	0.283	NOT	0.990085	0.254	NOT	1.1191	0.314	NOT	1.0099	0.346	NOT
TU0506	1	+	12051538	12054620			AT1G33240.1		398.849	1.32e-09	309.221	6.74e-06	317.26	0.000161473	383.088	1.5e-13	1.04114	0.262	NOT	441.955	1e-15	0.699666	0.136	NOT	348.812	1.54e-08	0.909544	0.323	NOT	0.775283	0.422	NOT	0.795439	0.256	NOT	1.15366	0.418	NOT	0.910527	0.195	NOT
TU0507	1	-	12075121	12076160			AT1G33290.1		316.511	8.06e-05	572.885	3.72e-05	641.275	3.05e-09	595.96	1.62e-06	0.531094	0.123	NOT	712.508	2.03e-09	0.80404	0.268	NOT	352.42	9.31e-05	1.81963	0.128	NOT	1.81	0.242	NOT	2.02607	0.0664	NOT	1.19556	0.45	NOT	0.591348	0.211	NOT
TU0508	1	+	12089202	12089601			AT1G33350.1		248.607	0.239191	32277.8	7e-21	1861.87	1.67e-07	146.69	0.847179	1.69478	0.0641	NOT	44096.8	4.58e-21	0.731976	0.036	NOT	9151.12	2.31e-15	0.203458	3.99e-05	DIFF	129.835	4.16e-09	DIFF	7.48921	2.53e-05	DIFF	300.612	2.66e-09	DIFF	62.3841	4.03e-09	DIFF
TU0509	1	-	12095413	12096619			AT1G33360.1		601.958	2.04e-07	442.218	2.33e-08	760.045	7.99e-12	534.164	5.34e-14	1.12692	0.479	NOT	832.218	2.05e-11	0.531373	0.121	NOT	714.344	7.98e-12	1.06398	0.476	NOT	0.734633	0.421	NOT	1.26262	0.241	NOT	1.55798	0.105	NOT	1.33731	0.263	NOT
TU0510	1	-	12207366	12208216			AT1G33680.1		571.281	1.48e-09	777.207	1.49e-16	444.172	1.19e-09	948.412	3.47e-17	0.602355	0.0957	NOT	921.94	2.56e-09	0.843013	0.236	NOT	647.982	3.4e-08	0.68547	0.0684	NOT	1.36046	0.123	NOT	0.777502	0.233	NOT	0.972088	0.193	NOT	0.683228	0.195	NOT
TU0511	1	+	12208957	12210039			AT1G33700.1		266.2	0.000249216	441.076	8.31e-09	251.021	0.00460574	266.595	0.000970006	0.998518	0.464	NOT	232.56	0.0144003	1.89661	0.0887	NOT	261.668	0.000420377	0.959311	0.179	NOT	1.65693	0.0494	NOT	0.942979	0.304	NOT	0.872334	0.43	NOT	0.981519	0.371	NOT
TU0512	1	+	12349559	12350932			AT1G33970.1		385.603	3.13e-05	419.562	3.53e-12	360.286	2.13e-06	416.039	1.27e-07	0.926843	0.133	NOT	435.59	1.16e-08	0.963204	0.492	NOT	361.687	1.78e-09	0.996126	0.0712	NOT	1.08807	0.272	NOT	0.934344	0.18	NOT	1.04699	0.348	NOT	0.869358	0.33	NOT
TU0513	1	-	12376379	12378601			AT1G34041.1		263.396	2.97e-07	495.905	9.58e-13	608.136	2e-16	308.478	4.36e-09	0.853857	0.204	NOT	459.653	6.83e-09	1.07887	0.317	NOT	638.016	7.85e-19	0.953167	0.217	NOT	1.88274	0.0215	NOT	2.30883	0.000671	DIFF	1.49007	0.0374	DIFF	2.06827	0.000456	DIFF
TU0514	1	-	12381841	12385767					1717.69	5.79e-15	2843.02	5.55e-18	2036.01	1.7e-16	1574.01	4.72e-18	1.09128	0.236	NOT	2755.98	1.01e-21	1.03158	0.483	NOT	2288.85	1.32e-18	0.889534	0.23	NOT	1.65514	0.0666	NOT	1.18532	0.442	NOT	1.75093	0.0163	DIFF	1.45415	0.0918	NOT
TU0515	1	+	12418657	12421772			AT1G34110.1	TU0516	302.601	5.06e-07	252.361	1.88e-05	257.56	3.68e-06	240.976	2.38e-05	1.25573	0.0438	NOT	253.523	2.21e-05	0.995417	0.147	NOT	295.976	4.51e-12	0.870206	0.121	NOT	0.833973	0.113	NOT	0.851154	0.0479	NOT	1.05207	0.29	NOT	1.22824	0.103	NOT
TU0516	1	-	12421260	12421625		AT1G34110		TU0515	1172.04	8.98e-14	846.635	7.23e-15	743.961	1.31e-12	1078.65	3.8e-14	1.08658	0.246	NOT	819.1	4.65e-10	1.03362	0.436	NOT	1114.28	1.84e-11	0.667661	0.209	NOT	0.72236	0.16	NOT	0.634757	0.0667	NOT	0.759375	0.299	NOT	1.03303	0.482	NOT
TU0517	1	-	12545113	12545996			AT1G34360.1		541.819	8.29e-07	460.132	1.15e-07	699.058	1.02e-10	722.612	1.99e-10	0.749806	0.149	NOT	693.642	3.25e-08	0.663357	0.452	NOT	601.415	4.32e-11	1.16236	0.254	NOT	0.849236	0.405	NOT	1.29021	0.176	NOT	0.959909	0.32	NOT	0.832279	0.211	NOT
TU0518	1	+	12600636	12601337					1115.45	2.2e-08	2633.82	4.48e-09	2099.55	3.13e-05	1742.83	2.22e-09	0.640022	0.382	NOT	2150.43	6.82e-16	1.22479	0.4	NOT	1887.15	4.22e-09	1.11255	0.37	NOT	2.36122	0.0288	NOT	1.88224	0.323	NOT	1.23387	0.0728	NOT	1.08281	0.468	NOT
TU0519	1	-	12711520	12713137					429.51	3.84e-16	326.115	1.62e-07	508.978	3.08e-15	566.572	8.37e-13	0.758085	0.104	NOT	380.158	2.33e-07	0.857841	0.468	NOT	454.992	4.21e-11	1.11865	0.356	NOT	0.759272	0.173	NOT	1.18502	0.288	NOT	0.670979	0.0175	DIFF	0.803061	0.148	NOT
TU0520	1	+	12840489	12842075			AT1G35110.1,AT1G35112.1		354.976	2.07e-07	533.787	3.05e-11	579.12	6.45e-10	321.237	1.51e-06	1.10503	0.306	NOT	432.55	4.23e-13	1.23405	0.438	NOT	575.442	5.4e-10	1.00639	0.3	NOT	1.50373	0.217	NOT	1.63143	0.178	NOT	1.34651	0.0985	NOT	1.79133	0.0208	DIFF
TU0521	1	-	12924050	12924536					403.581	0.00013215	472.354	1.39e-05	510.163	2.12e-07	978.416	5.34e-14	0.412484	0.0313	NOT	822.338	1.77e-07	0.574404	0.401	NOT	565.771	0.00151073	0.901713	0.423	NOT	1.17041	0.287	NOT	1.26409	0.319	NOT	0.840479	0.177	NOT	0.578252	0.0984	NOT
TU0522	1	+	12936958	12939113			AT1G35260.1		1022.32	9.99e-19	507.944	0.000449186	311.91	2.7e-07	923.665	6.22e-17	1.10681	0.376	NOT	342.73	1.43e-07	1.48205	0.233	NOT	261.831	0.00158663	1.19126	0.441	NOT	0.496854	0.0001	DIFF	0.3051	2.15e-05	DIFF	0.371054	6.23e-05	DIFF	0.28347	3.56e-05	DIFF
TU0523	1	-	13025786	13027390			AT1G35420.1		475.248	4.94e-11	414.437	9.3e-08	473.864	7.83e-14	614.275	2.16e-10	0.773673	0.326	NOT	572.559	4.16e-11	0.723833	0.228	NOT	353.577	2.25e-05	1.3402	0.222	NOT	0.872044	0.255	NOT	0.997088	0.49	NOT	0.932089	0.372	NOT	0.575601	0.087	NOT
TU0524	1	-	13065369	13067365			AT1G35500.1		889.314	8.12e-21	482.044	2.59e-07	540.749	7.71e-12	825.588	3.8e-14	1.07719	0.397	NOT	371.378	2.14e-09	1.29799	0.295	NOT	499.071	3.37e-14	1.08351	0.348	NOT	0.54204	0.00691	DIFF	0.608052	0.00797	DIFF	0.449835	0.00252	DIFF	0.604504	0.0293	DIFF
TU0525	1	+	13115994	13117739			AT1G35560.1		775.99	8.31e-26	538.528	2.71e-13	542.822	5.67e-12	488.937	8.01e-12	1.5871	0.0871	NOT	437.747	2.16e-14	1.23023	0.318	NOT	449.005	9.01e-09	1.20894	0.325	NOT	0.693988	0.072	NOT	0.699522	0.0654	NOT	0.895303	0.335	NOT	0.918329	0.253	NOT
TU0526	1	+	13122280	13125679			AT1G35580.1		1092.49	2.82e-26	387.559	8.71e-09	325.42	6.02e-11	848.27	3.38e-17	1.2879	0.043	NOT	582.757	2.69e-11	0.665044	0.0254	NOT	465.248	1.55e-09	0.699455	0.0463	NOT	0.354748	1.78e-10	DIFF	0.29787	3.44e-12	DIFF	0.686995	0.00233	DIFF	0.548467	2.24e-05	DIFF
TU0527	1	-	13227681	13228392			AT1G35720.1		3404.34	1.38e-21	1480.61	5.82e-13	1565.24	1.35e-15	3629.32	1.63e-15	0.93801	0.394	NOT	1692.21	1.21e-15	0.874956	0.269	NOT	1269.99	1.74e-15	1.23248	0.394	NOT	0.434918	0.0062	DIFF	0.459778	0.00651	DIFF	0.466261	0.00215	DIFF	0.349925	0.000796	DIFF
TU0528	1	-	13231013	13231285					306.857	0.00133902	1654.75	1.11e-21	1255.9	3.39e-07	417.474	0.00431224	0.735033	0.428	NOT	4040.67	1.32e-48	0.409524	0.00157	DIFF	5281.33	1.85e-46	0.2378	0.00103	DIFF	5.39258	0.0315	NOT	4.09279	0.0549	NOT	9.67885	8.68e-05	DIFF	12.6507	9.63e-06	DIFF
TU0529	1	-	13282415	13284477					1832.91	9.71e-23	493.397	1.74e-11	607.089	1.33e-11	2821.38	1.33e-30	0.64965	0.00553	NOT	1327.49	1.34e-20	0.371677	0.000209	DIFF	1197.26	9.01e-21	0.507065	0.00619	NOT	0.269188	0.000689	DIFF	0.331216	0.00206	DIFF	0.470511	0.00633	DIFF	0.424353	0.00169	DIFF
TU0530	1	+	13479127	13480433					575.083	8.61e-09	439.592	1.2e-06	373.702	1.27e-05	1064.87	4.96e-11	0.54005	0.11	NOT	438.406	5.35e-06	1.00271	0.185	NOT	444.536	1.92e-05	0.840656	0.287	NOT	0.764397	0.0489	NOT	0.649823	0.172	NOT	0.411699	0.0142	DIFF	0.417456	0.044	DIFF
TU0531	1	-	13482139	13482609					1994.98	8.28e-09	2346.82	2.24e-12	3626.05	1.6e-11	2382.72	6.19e-10	0.83727	0.469	NOT	2569.52	1.13e-11	0.91333	0.497	NOT	3979.31	8.73e-15	0.911226	0.32	NOT	1.17636	0.394	NOT	1.81759	0.306	NOT	1.0784	0.467	NOT	1.67007	0.104	NOT
TU0532	1	-	13541822	13545023			AT1G36160.1		335.858	9.91e-13	274.887	6.88e-07	293.952	3.64e-07	286.649	2.17e-08	1.17167	0.136	NOT	260.745	2.82e-06	1.05424	0.268	NOT	270.035	6.04e-05	1.08857	0.453	NOT	0.818462	0.0393	NOT	0.875227	0.079	NOT	0.909632	0.0901	NOT	0.942041	0.318	NOT
TU0533	1	-	13565607	13566588			AT1G36185.1		586.14	2.05e-08	340.883	0.00507989	331.589	0.0236805	631.711	5.04e-09	0.927861	0.332	NOT	357.994	0.000164738	0.952203	0.0468	NOT	362.814	0.00284157	0.913937	0.467	NOT	0.581573	0.00392	DIFF	0.565716	0.0586	NOT	0.566705	0.132	NOT	0.574335	0.0394	DIFF
TU0534	1	-	13611369	13611714					859.508	3.73e-07	437.21	3.73e-07	417.07	1.69e-07	665.484	5.09e-11	1.29155	0.173	NOT	564.411	6.2e-06	0.774631	0.425	NOT	626.801	2.2e-10	0.665395	0.178	NOT	0.508675	0.112	NOT	0.485243	0.099	NOT	0.848121	0.342	NOT	0.941872	0.255	NOT
TU0535	1	-	13707754	13708145					1708.75	3.18e-09	1063.12	4.73e-06	2852.8	1.42e-09	3085.01	8.41e-06	0.553888	0.356	NOT	1918.05	9.88e-06	0.554271	0.378	NOT	1597.74	2.22e-05	1.78552	0.233	NOT	0.622162	0.11	NOT	1.66952	0.353	NOT	0.621732	0.295	NOT	0.517904	0.215	NOT
TU0536	1	-	13728525	13729232			AT1G36440.1		1300.09	1.17e-18	1061.29	2.44e-12	1245.94	6.33e-20	969.218	7.65e-10	1.34138	0.0657	NOT	945.706	1.34e-11	1.12222	0.436	NOT	887.053	5.57e-16	1.40458	0.328	NOT	0.81632	0.0782	NOT	0.958349	0.274	NOT	0.975741	0.286	NOT	0.915225	0.33	NOT
TU0537	1	+	13899557	13901472			AT1G36730.1,AT1G36732.1		712.429	3.68e-17	1346.83	2.07e-25	693.772	1.02e-14	829.83	1.53e-23	0.858524	0.124	NOT	1230.62	1.15e-23	1.09443	0.29	NOT	628.794	1.57e-14	1.10334	0.418	NOT	1.89048	0.00506	DIFF	0.973812	0.415	NOT	1.48298	0.131	NOT	0.757738	0.0536	DIFF
TU0538	1	-	14157659	14158264					690.447	4.81e-08	951.466	2.23e-11	983.676	1.37e-09	1074.64	2.91e-07	0.642491	0.314	NOT	920.123	2.18e-09	1.03406	0.402	NOT	1231.48	2.99e-11	0.798775	0.292	NOT	1.37804	0.448	NOT	1.42469	0.476	NOT	0.856215	0.381	NOT	1.14595	0.144	NOT
TU0539	1	-	14162671	14164151			AT1G37130.1		1644.09	5e-24	1555.35	1.15e-22	845.616	1.81e-11	1674.76	6.8e-23	0.981687	0.426	NOT	1182.02	2.57e-19	1.31584	0.281	NOT	554.875	3.98e-08	1.52398	0.105	NOT	0.946025	0.197	NOT	0.514337	0.0084	DIFF	0.705785	0.0622	NOT	0.331316	5.59e-05	DIFF
TU0540	1	+	14198704	14198886					7098.48	9.47e-13	7794.99	2.21e-13	8096.16	6.36e-14	6542.25	1.44e-11	1.08502	0.475	NOT	8840.89	5.94e-14	0.881697	0.255	NOT	9219.95	7.95e-14	0.878113	0.171	NOT	1.09812	0.325	NOT	1.14055	0.31	NOT	1.35135	0.12	NOT	1.40929	0.0935	NOT
TU0541	1	-	14337351	14340431			AT1G38185.1		391.985	2.3e-14	357.773	3.65e-07	366.219	2.91e-15	384.215	1.01e-10	1.02022	0.478	NOT	381.923	4.81e-14	0.936767	0.453	NOT	381.035	1e-08	0.961116	0.482	NOT	0.912721	0.473	NOT	0.934268	0.315	NOT	0.994035	0.463	NOT	0.991723	0.381	NOT
TU0542	1	-	15547421	15552788			AT1G41790.1		330.424	2.47e-10	309.933	3.56e-07	376.817	2.8e-09	325.681	4.8e-09	1.01456	0.398	NOT	323.839	3.6e-08	0.957059	0.105	NOT	313.134	7.86e-09	1.20337	0.331	NOT	0.937986	0.169	NOT	1.1404	0.266	NOT	0.994344	0.31	NOT	0.961475	0.331	NOT
TU0543	1	-	15803376	15808598			AT1G42320.1		319.733	5.87e-10	313.891	4.41e-10	351.702	1.78e-11	266.02	1.88e-10	1.20191	0.0655	NOT	240.85	1.88e-07	1.30326	0.105	NOT	325.79	1.36e-09	1.07954	0.341	NOT	0.981729	0.284	NOT	1.09999	0.42	NOT	0.905383	0.403	NOT	1.22468	0.166	NOT
TU0544	1	+	15871142	15871546					11579.4	1.56e-08	5437.28	1.23e-05	6789.37	2.18e-08	11117.5	1.08e-08	1.04155	0.454	NOT	4754.32	4.79e-05	1.14365	0.5	NOT	4218	1.2e-10	1.60962	0.476	NOT	0.469565	0.0186	NOT	0.586332	0.0313	DIFF	0.427643	0.02	DIFF	0.379402	0.0439	DIFF
TU0545	1	-	15978152	15982188			AT1G42540.1,AT1G42550.1		492.538	8.63e-15	518.767	3.01e-10	465.101	7.57e-12	475.48	3.19e-13	1.03588	0.329	NOT	526.622	6.32e-15	0.985084	0.18	NOT	532.11	5.13e-17	0.874069	0.0546	NOT	1.05325	0.174	NOT	0.944295	0.188	NOT	1.10756	0.33	NOT	1.1191	0.347	NOT
TU0546	1	-	16117998	16118667					832.557	6.31e-14	728.992	5.93e-11	738.237	3.88e-09	1135.42	2.33e-13	0.733259	0.109	NOT	722.323	1.59e-12	1.00923	0.399	NOT	927.482	1.22e-10	0.795958	0.194	NOT	0.875606	0.177	NOT	0.88671	0.192	NOT	0.636173	0.0147	DIFF	0.816862	0.137	NOT
TU0547	1	-	16130579	16132063			AT1G42970.1		1294.65	7.17e-19	939.267	3.34e-12	923.553	3.45e-18	1450.75	1.54e-24	0.8924	0.195	NOT	1353.14	4.26e-13	0.694139	0.205	NOT	819.96	4.93e-13	1.12634	0.4	NOT	0.725499	0.0942	NOT	0.713361	0.149	NOT	0.932718	0.117	NOT	0.565197	0.0171	DIFF
TU0548	1	+	16138498	16139903			AT1G42990.1		835.11	5.16e-10	1015.43	5.73e-10	896.881	1.94e-07	839.111	1.95e-07	0.995232	0.284	NOT	1655.46	1.56e-13	0.613382	0.0255	NOT	993.006	6.03e-12	0.903198	0.245	NOT	1.21592	0.179	NOT	1.07397	0.356	NOT	1.97287	0.000388	DIFF	1.1834	0.0504	DIFF
TU0549	1	-	16269897	16271309			AT1G43170.1		1351.46	3.17e-15	898.679	2e-15	858.933	1.13e-15	1324.57	9.45e-20	1.0203	0.276	NOT	1034.99	8.29e-13	0.868297	0.313	NOT	588.772	1.17e-12	1.45886	0.283	NOT	0.664969	0.182	NOT	0.635559	0.0724	NOT	0.781378	0.029	DIFF	0.4445	0.00462	DIFF
TU0550	1	+	16277605	16278265			AT1G43190.1		1037.9	9.66e-11	1061.98	5.5e-16	1199.24	1.21e-10	1064.43	3.13e-08	0.975076	0.425	NOT	1277.52	4.82e-08	0.831282	0.359	NOT	1457.06	9.87e-09	0.823055	0.489	NOT	1.0232	0.418	NOT	1.15545	0.489	NOT	1.20019	0.461	NOT	1.36886	0.387	NOT
TU0551	1	-	16323009	16324014			AT1G43270.1		578.278	4.86e-11	525.714	1.98e-09	496.374	6.46e-10	527.292	3.76e-07	1.09669	0.0671	NOT	671.622	5.51e-11	0.782753	0.228	NOT	507.509	1.46e-07	0.97806	0.175	NOT	0.909103	0.0739	NOT	0.858366	0.413	NOT	1.27372	0.219	NOT	0.962482	0.34	NOT
TU0552	1	+	16339865	16340565			AT1G43300.1		1168.24	2.12e-09	1532.14	1.7e-06	1330.26	1.94e-09	1149.2	8.86e-09	1.01657	0.322	NOT	1381.35	8.84e-07	1.10916	0.426	NOT	1906.21	5.55e-12	0.697856	0.459	NOT	1.31149	0.442	NOT	1.13869	0.213	NOT	1.20201	0.202	NOT	1.65873	0.426	NOT
TU0553	1	+	16411742	16413516			AT1G43580.1		608.102	8.35e-12	426.839	1.88e-05	320.823	0.000244532	916.659	4.99e-08	0.66339	0.392	NOT	455.914	1.73e-05	0.936227	0.209	NOT	502.155	2.87e-06	0.638892	0.138	NOT	0.70192	0.29	NOT	0.527581	0.0398	NOT	0.497365	0.0751	NOT	0.54781	0.174	NOT
TU0554	1	+	16416045	16416547					213.724	0.00991734	494.799	0.000652644	671.587	0.00132963	435.056	3.49e-07	0.491256	0.0205	NOT	1454.3	1.49e-12	0.340232	0.000947	DIFF	2800.21	1.26e-12	0.239835	7.1e-06	DIFF	2.31513	0.0132	DIFF	3.14231	0.00176	DIFF	3.34279	0.00221	DIFF	6.43644	3.69e-06	DIFF
TU0555	1	-	16473899	16474382					616.05	7.05e-07	845.927	3.46e-05	516.383	7.61e-06	693.423	6.48e-06	0.888419	0.35	NOT	869.342	3.15e-10	0.973066	0.195	NOT	568.705	0.0136847	0.907998	0.341	NOT	1.37315	0.454	NOT	0.838216	0.324	NOT	1.2537	0.183	NOT	0.820142	0.123	NOT
TU0556	1	-	16480961	16481158			AT1G43690.1		1337.71	1.85e-10	944.323	1.74e-06	955.525	0.00133525	1233.77	7.09e-09	1.08425	0.358	NOT	1155.86	2.54e-05	0.816987	0.376	NOT	1083.71	6.17e-06	0.881717	0.284	NOT	0.705925	0.425	NOT	0.714299	0.159	NOT	0.936852	0.418	NOT	0.878373	0.34	NOT
TU0557	1	-	16484262	16485095			AT1G43690.1		1394.04	7.84e-20	1025.08	1.48e-17	772.966	2.02e-11	1335.15	2.75e-20	1.04411	0.265	NOT	1114.58	7.78e-14	0.919701	0.403	NOT	728.162	7.82e-08	1.06153	0.28	NOT	0.73533	0.414	NOT	0.554479	0.11	NOT	0.834798	0.153	NOT	0.545378	0.00388	DIFF
TU0558	1	-	16497489	16498422			AT1G43720.1		608.22	3.64e-10	588.868	1.81e-07	802.543	1.69e-10	607.901	1.69e-06	1.00052	0.472	NOT	433.804	1.15e-05	1.35745	0.351	NOT	507.567	6.72e-06	1.58116	0.374	NOT	0.968183	0.46	NOT	1.31949	0.349	NOT	0.71361	0.368	NOT	0.83495	0.472	NOT
TU0559	1	-	16540269	16545693			AT1G43765.1		732.855	9.98e-08	505.194	4.41e-07	426.055	4.41e-07	737.62	3.37e-10	0.99354	0.104	NOT	422.796	1.73e-08	1.19489	0.364	NOT	858.548	7.21e-11	0.496251	0.375	NOT	0.689351	0.299	NOT	0.581363	0.461	NOT	0.573189	0.0702	NOT	1.16394	0.159	NOT
TU0560	1	-	16578362	16581842			AT1G43790.1,AT1G43800.1		521.058	3.73e-07	406.562	5.49e-05	328.315	9.6e-06	437.845	8.07e-05	1.19005	0.192	NOT	612.886	1.77e-09	0.663357	0.209	NOT	301.656	1.04e-05	1.08838	0.251	NOT	0.780262	0.306	NOT	0.630093	0.172	NOT	1.39978	0.115	NOT	0.688956	0.246	NOT
TU0561	1	+	16583769	16585229					676.279	1.7e-13	395.963	3.82e-06	485.12	5.4e-11	622.29	3.7e-12	1.08676	0.109	NOT	423.494	2.89e-12	0.934991	0.425	NOT	382.761	1.12e-08	1.26742	0.182	NOT	0.585502	0.0228	NOT	0.717337	0.0919	NOT	0.680541	0.346	NOT	0.615085	0.193	NOT
TU0562	1	-	16623130	16624377			AT1G43850.1		406.566	2.46e-11	387.92	6.09e-07	339.497	4.12e-07	451.931	5.34e-14	0.89962	0.154	NOT	353.738	3.56e-08	1.09663	0.462	NOT	366.176	1.7e-07	0.927142	0.239	NOT	0.954138	0.255	NOT	0.835035	0.149	NOT	0.782726	0.047	DIFF	0.810248	0.08	NOT
TU0563	1	+	16663455	16666394			AT1G43930.1		324.789	6.09e-06	426.674	1.83e-09	300.497	3.73e-07	382.481	6.13e-08	0.849164	0.419	NOT	356.506	8.58e-09	1.19682	0.307	NOT	319.747	1.03e-07	0.939796	0.424	NOT	1.3137	0.432	NOT	0.925207	0.22	NOT	0.932088	0.443	NOT	0.835981	0.247	NOT
TU0564	1	+	16710506	16710937			AT1G44000.1		2142.59	4.24e-15	1228.52	2.59e-08	812.155	1.56e-09	1661.55	2.28e-12	1.28951	0.357	NOT	664.037	3.5e-07	1.85008	0.173	NOT	274.618	1.39e-07	2.9574	0.0616	NOT	0.573381	0.0656	NOT	0.379053	0.00687	DIFF	0.399649	0.00718	DIFF	0.165278	0.000154	DIFF
TU0565	1	-	16729875	16733310					344.615	1.43e-20	295.407	1.39e-18	432.493	1.75e-16	324.002	2.78e-19	1.06362	0.376	NOT	401.708	7.47e-14	0.735377	0.131	NOT	340.008	2.53e-16	1.27201	0.3	NOT	0.857209	0.14	NOT	1.255	0.371	NOT	1.23983	0.371	NOT	1.0494	0.464	NOT
TU0566	1	-	16748144	16748349					3587.35	3.52e-15	2523.76	2.31e-12	3370.8	9.28e-12	2936.45	2.15e-11	1.22166	0.127	NOT	1469.41	4.66e-10	1.71753	0.0169	NOT	3301.75	2.45e-13	1.02091	0.412	NOT	0.703517	0.0184	NOT	0.939635	0.233	NOT	0.500404	0.00391	DIFF	1.1244	0.233	NOT
TU0567	1	-	16784130	16789407	AT1G44125	AT1G44125	AT1G44120.1		490.43	1.18e-12	335.987	4.78e-08	357.919	8.2e-12	386.432	2.15e-14	1.26912	0.0282	NOT	338.186	1.24e-09	0.993498	0.363	NOT	326.547	1.61e-10	1.09607	0.295	NOT	0.685087	5.05e-05	DIFF	0.729806	0.00437	DIFF	0.87515	0.0304	DIFF	0.845031	0.0773	NOT
TU0568	1	+	16850532	16850949			AT1G44446.1		566.465	1.11e-08	19233.1	2.45e-44	4973.47	3.08e-24	422.331	2.49e-07	1.34128	0.187	NOT	30220.2	1.2e-44	0.636432	0.171	NOT	18515	2.27e-44	0.268618	0.00569	NOT	33.9528	7.33e-05	DIFF	8.77984	0.0104	DIFF	71.5557	5.4e-06	DIFF	43.84	3.79e-05	DIFF
TU0569	1	-	16874091	16876787			AT1G44575.1		3792.08	9.26e-12	3476.36	6.07e-13	2832.86	4.95e-14	3658.93	1.39e-12	1.03639	0.441	NOT	3499.77	1.35e-11	0.993311	0.292	NOT	2586.25	5.24e-12	1.09535	0.334	NOT	0.916742	0.465	NOT	0.747046	0.318	NOT	0.956501	0.482	NOT	0.706832	0.497	NOT
TU0570	1	-	16888640	16891110			AT1G44740.1		442.457	2.2e-05	746.378	1.41e-12	575.841	1.92e-08	383.233	0.000110759	1.15454	0.326	NOT	805.682	2.2e-08	0.926393	0.226	NOT	671.643	1.3e-07	0.857362	0.483	NOT	1.68689	0.0832	NOT	1.30146	0.408	NOT	2.10233	0.157	NOT	1.75257	0.236	NOT
TU0571	1	+	16927324	16927963					2503.5	4.95e-22	1547.43	6.25e-22	1689.89	4.56e-24	2076.74	2.36e-26	1.2055	0.158	NOT	1125.03	2.98e-17	1.37546	0.195	NOT	837.339	3.61e-14	2.01817	0.0108	NOT	0.618107	0.00532	DIFF	0.675011	0.021	DIFF	0.541729	0.00823	DIFF	0.403199	0.000444	DIFF
TU0572	1	-	16984755	16985233			AT1G44910.1		1120.62	6.82e-15	990.805	2.64e-14	1226.19	2.39e-13	1333.39	6.79e-16	0.840429	0.313	NOT	971.017	5.34e-13	1.02038	0.446	NOT	887.842	1.79e-10	1.38109	0.237	NOT	0.884158	0.345	NOT	1.09421	0.445	NOT	0.728232	0.228	NOT	0.665853	0.0618	DIFF
TU0573	1	-	17069666	17070195			AT1G45130.1		769.878	2.05e-09	265.708	0.00058251	308.717	0.00014787	661.418	7.73e-15	1.16398	0.469	NOT	446.221	4.22e-05	0.595463	0.0461	NOT	272.292	0.0010061	1.13377	0.371	NOT	0.34513	0.00344	DIFF	0.400995	0.0144	DIFF	0.674643	0.0517	NOT	0.411679	0.00763	DIFF
TU0574	1	-	17071158	17071359			AT1G45130.1		1500.02	1.04e-10	1077.69	1e-05	1125.42	2.89e-05	1310.2	7.22e-09	1.14488	0.437	NOT	755.731	7.33e-07	1.42602	0.212	NOT	810.505	4.94e-08	1.38854	0.481	NOT	0.71845	0.487	NOT	0.75027	0.265	NOT	0.576806	0.282	NOT	0.618612	0.294	NOT
TU0575	1	+	17076915	17078017			AT1G45140.1,AT1G45145.1		448.387	3.73e-07	465.736	6.52e-07	432.638	1.12e-08	663.999	1.07e-06	0.675283	0.0921	NOT	523.564	5.18e-09	0.889549	0.122	NOT	596.388	7.89e-09	0.72543	0.0453	NOT	1.03869	0.473	NOT	0.964876	0.371	NOT	0.788501	0.496	NOT	0.898176	0.401	NOT
TU0576	1	-	17093309	17093802	AT1G45163	AT1G45163	AT1G45165.1		268.745	0.0795534	321.988	0.000110839	267.141	0.136468	822.68	1.48e-09	0.32667	0.0592	NOT	847.958	4.01e-07	0.379722	0.0606	NOT	962.526	9.87e-06	0.277542	0.00469	NOT	1.19812	0.325	NOT	0.994032	0.109	NOT	1.03073	0.383	NOT	1.16999	0.438	NOT
TU0577	1	-	17120897	17121514			AT1G45191.2		715.899	2.7e-11	454.19	0.00127895	275.09	0.000449035	341.387	0.00133523	2.09703	0.0166	NOT	416.474	0.000112339	1.09056	0.485	NOT	421.566	0.0102365	0.652543	0.314	NOT	0.634433	0.0383	NOT	0.384258	0.0054	DIFF	1.21995	0.365	NOT	1.23486	0.486	NOT
TU0578	1	-	17129236	17130973			AT1G45201.1		2496.58	7.52e-16	1629.72	4.86e-12	1540.54	1.22e-13	3183.08	3.58e-17	0.784328	0.107	NOT	1038.06	6.44e-11	1.56997	0.135	NOT	936.773	4.08e-12	1.64452	0.0738	NOT	0.652781	0.252	NOT	0.61706	0.24	NOT	0.326118	0.00137	DIFF	0.294298	0.000324	DIFF
TU0579	1	-	17193783	17195544			AT1G45688.1		464.644	5.64e-10	464.442	9.18e-16	366.234	2.27e-07	364.29	3.47e-08	1.27548	0.39	NOT	808.315	1.21e-15	0.57458	0.0291	NOT	456.081	2.59e-11	0.803002	0.344	NOT	0.999565	0.365	NOT	0.788203	0.268	NOT	2.21888	0.0123	DIFF	1.25197	0.471	NOT
TU0580	1	-	17273788	17274466			AT1G46840.1		299.313	0.000449056	178.529	0.231578	273.512	0.0171714	107.958	0.197575	2.77249	0.00588	NOT	423.801	3.13e-14	0.421257	0.0151	NOT	197.239	0.00316226	1.3867	0.384	NOT	0.596463	0.0161	DIFF	0.913799	0.146	NOT	3.92561	0.00941	DIFF	1.827	0.178	NOT
TU0581	1	+	17285530	17286202			AT1G47128.1		1046.54	9.8e-10	931.216	7.7e-09	688.206	8.1e-08	977.258	2.32e-11	1.07089	0.424	NOT	819.391	5.73e-10	1.13647	0.385	NOT	905.86	1.1e-09	0.759727	0.138	NOT	0.889804	0.353	NOT	0.657601	0.147	NOT	0.838459	0.181	NOT	0.92694	0.468	NOT
TU0582	1	+	17298015	17298712					8101.22	3.53e-33	4343.63	3.74e-31	6176.22	6.17e-29	7894.77	9.84e-30	1.02615	0.496	NOT	6126.2	3.33e-33	0.709025	0.0613	NOT	7868.06	3.86e-34	0.784974	0.0663	NOT	0.53617	0.00651	DIFF	0.762381	0.122	NOT	0.775982	0.167	NOT	0.996617	0.358	NOT
TU0583	1	+	17300520	17301161			AT1G47200.1		648.165	1.16e-12	788.88	3.36e-11	768.118	4.73e-08	699.228	1.08e-08	0.926972	0.432	NOT	898.861	1.75e-09	0.877644	0.446	NOT	425.712	0.000132144	1.80431	0.08	NOT	1.2171	0.339	NOT	1.18507	0.468	NOT	1.2855	0.496	NOT	0.608831	0.0616	DIFF
TU0584	1	+	17323580	17324128			AT1G47260.1		1244.41	7.41e-19	1273.12	1.24e-14	744.272	3.51e-19	1302.53	3.98e-20	0.955379	0.288	NOT	1361.79	1.69e-25	0.934887	0.337	NOT	1094.98	2.94e-20	0.679713	0.0842	NOT	1.02307	0.45	NOT	0.598092	0.143	NOT	1.0455	0.442	NOT	0.840656	0.376	NOT
TU0585	1	+	17344048	17345324					410.379	2.85e-09	462.322	5.04e-09	440.135	6.05e-08	1892.46	4.71e-39	0.216849	4.95e-09	DIFF	1171.86	6.44e-45	0.39452	5.42e-06	DIFF	1415.65	1.14e-39	0.310907	1.21e-09	DIFF	1.12657	0.28	NOT	1.07251	0.2	NOT	0.619226	0.00716	DIFF	0.748048	0.116	NOT
TU0586	1	+	17395013	17395388					656.711	9.51e-06	259.882	0.0434835	212.695	0.0775021	1208.85	6.93e-06	0.543253	0.0339	NOT	635.434	1.29e-06	0.408983	0.0117	NOT	1725.85	1.08e-11	0.123241	1.67e-09	DIFF	0.395733	0.00186	DIFF	0.323879	0.000361	DIFF	0.525652	0.0102	DIFF	1.42768	0.0297	DIFF
TU0587	1	+	17480105	17480983					778.972	4.86e-11	365.571	7.02e-05	423.1	0.000602995	1167.83	8.29e-16	0.667025	0.112	NOT	552.242	0.00159452	0.661976	0.493	NOT	680.768	1.12e-08	0.621504	0.0131	NOT	0.469299	0.0401	NOT	0.543152	0.0135	DIFF	0.472879	0.00603	DIFF	0.582934	0.0462	DIFF
TU0588	1	-	17488080	17489742			AT1G47580.1		380.614	9.42e-12	384.002	0.000108702	357.17	1.69e-07	450.86	1.37e-07	0.844196	0.475	NOT	591.502	1.5e-10	0.649198	0.206	NOT	360.647	0.00222303	0.990359	0.395	NOT	1.0089	0.459	NOT	0.938405	0.384	NOT	1.31194	0.195	NOT	0.799909	0.422	NOT
TU0589	1	+	17623561	17624695			AT1G47860.1		6440.53	5.92e-20	8550.53	4.73e-22	17916	1.1e-23	6329.95	3.95e-18	1.01747	0.379	NOT	7053.67	3.05e-19	1.21221	0.251	NOT	15103.4	1.59e-23	1.18622	0.188	NOT	1.32761	0.258	NOT	2.78176	0.0099	DIFF	1.11433	0.41	NOT	2.38602	0.0099	DIFF
TU0590	1	-	17655062	17655284					740.923	0.00068231	756.474	1.98e-05	594.104	1.66e-06	982.926	5.35e-09	0.753793	0.109	NOT	384.981	0.0248054	1.96496	0.307	NOT	451.075	2.35e-08	1.31708	0.351	NOT	1.02099	0.43	NOT	0.801843	0.361	NOT	0.391668	0.0296	DIFF	0.45891	0.0368	DIFF
TU0591	1	+	17666136	17667472					873.911	1.51e-06	1123.11	2.14e-08	943.997	2.96e-07	987.857	1.58e-09	0.884653	0.329	NOT	1168.27	3.1e-09	0.961345	0.0446	NOT	1136.54	4.49e-10	0.830588	0.218	NOT	1.28515	0.351	NOT	1.0802	0.473	NOT	1.18263	0.154	NOT	1.15051	0.357	NOT
TU0592	1	-	17690910	17691366			AT1G47970.1		1104.28	3.93e-06	754.08	0.000299251	673.61	1.47e-08	1157.17	1.59e-06	0.954294	0.446	NOT	1494.9	4.44e-07	0.504435	0.171	NOT	1353.28	4.11e-10	0.497761	0.0432	NOT	0.68287	0.189	NOT	0.609999	0.178	NOT	1.29186	0.496	NOT	1.16947	0.343	NOT
TU0593	1	+	17720949	17724582			AT1G48030.1		505.76	3.2e-16	473.189	4.2e-19	296.548	4.92e-07	412.417	9.53e-14	1.22633	0.454	NOT	419.852	2.16e-14	1.12704	0.245	NOT	316.547	1.32e-07	0.936821	0.341	NOT	0.9356	0.344	NOT	0.586341	0.077	NOT	1.01803	0.468	NOT	0.767541	0.149	NOT
TU0594	1	-	17731843	17732584			AT1G48060.1		203.479	0.12738	310.13	0.00087967	283.471	0.00133525	189.44	0.0517578	1.07411	0.271	NOT	497.754	6.82e-11	0.623059	0.0392	NOT	333.357	0.0107688	0.850353	0.404	NOT	1.52414	0.25	NOT	1.39312	0.254	NOT	2.6275	0.0108	DIFF	1.7597	0.334	NOT
TU0595	1	+	17773750	17776319			AT1G48110.1		593.319	3.22e-15	538.489	4.86e-11	402.093	2.24e-08	549.364	7.54e-12	1.08001	0.0765	NOT	410.292	2.79e-12	1.31245	0.161	NOT	431.022	3.94e-12	0.932883	0.328	NOT	0.907588	0.0608	NOT	0.677701	0.000975	DIFF	0.746849	0.163	NOT	0.784584	0.112	NOT
TU0596	1	+	17777642	17778693			AT1G48120.1		266.047	0.000449035	503.669	2.85e-11	303.822	9.64e-05	167.561	0.0308065	1.58776	0.111	NOT	472.39	1e-15	1.06621	0.497	NOT	388.945	1.2e-08	0.781144	0.263	NOT	1.89316	0.0237	NOT	1.14199	0.459	NOT	2.81921	0.00114	DIFF	2.32121	0.0484	DIFF
TU0597	1	+	17809480	17809876	AT1G48230	AT1G48230			2134.1	1.18e-11	1796.84	2.53e-08	3127.36	2.61e-10	2373.52	3.63e-11	0.899129	0.451	NOT	1554.84	6.5e-09	1.15564	0.467	NOT	1750.89	4.47e-09	1.78615	0.163	NOT	0.841966	0.205	NOT	1.46542	0.31	NOT	0.655078	0.142	NOT	0.737677	0.202	NOT
TU0598	1	+	17850775	17851017					25973.8	1.32e-24	21461.9	5.31e-30	16394.1	2.19e-23	25928	1.86e-25	1.00177	0.437	NOT	22984.8	1.69e-27	0.933743	0.243	NOT	19365.5	9.69e-26	0.846562	0.274	NOT	0.82629	0.388	NOT	0.631178	0.103	NOT	0.886486	0.5	NOT	0.746895	0.179	NOT
TU0599	1	+	17901820	17902559			AT1G48420.1		508.484	9.2e-11	312.567	0.0235206	317.877	0.00422701	519.167	5.84e-08	0.979423	0.385	NOT	301.472	0.0283773	1.0368	0.273	NOT	380.58	2.57e-05	0.835244	0.214	NOT	0.614704	0.0467	NOT	0.625147	0.0235	DIFF	0.580684	0.0298	DIFF	0.733059	0.282	NOT
TU0600	1	+	17912375	17913465			AT1G48450.1		583.463	1.36e-17	732.286	1.09e-19	620.437	4.26e-24	634.787	3.23e-14	0.919148	0.235	NOT	687.335	6.24e-17	1.0654	0.365	NOT	470.155	7.41e-18	1.31964	0.436	NOT	1.25507	0.274	NOT	1.06337	0.343	NOT	1.08278	0.372	NOT	0.74065	0.0981	NOT
TU0601	1	-	17931234	17932451	AT1G48490	AT1G48490			580.41	7.67e-07	653.49	2.72e-09	472.338	7.99e-12	576.282	5.32e-07	1.00716	0.425	NOT	450.7	3.73e-07	1.44994	0.0733	NOT	469.029	1.98e-09	1.00706	0.335	NOT	1.12591	0.122	NOT	0.813801	0.49	NOT	0.782082	0.494	NOT	0.813888	0.256	NOT
TU0602	1	-	17944923	17945346			AT1G48520.1		998.95	1.35e-11	891.349	7.58e-11	881.912	1.54e-10	1185.65	1.18e-07	0.842534	0.35	NOT	684.694	1.01e-07	1.30182	0.278	NOT	803.573	5e-06	1.09749	0.313	NOT	0.892286	0.473	NOT	0.882839	0.468	NOT	0.577484	0.473	NOT	0.677749	0.415	NOT
TU0603	1	+	17964498	17965598					1271.99	5.58e-31	901.646	1.07e-23	1262.65	2.68e-26	1164.92	2.24e-24	1.09191	0.468	NOT	1989.28	2.16e-39	0.453252	0.000186	DIFF	1928.12	9.89e-39	0.654861	0.00566	NOT	0.708847	0.0886	NOT	0.992657	0.496	NOT	1.70765	0.00608	DIFF	1.65515	0.00348	DIFF
TU0604	1	-	17967636	17970895			AT1G48590.1,AT1G48598.1,AT1G48600.1		454.72	2.99e-12	384.795	1.05e-06	470.898	1.23e-08	322.932	1.23e-08	1.4081	0.188	NOT	367.084	1.12e-06	1.04825	0.457	NOT	257.192	0.0136752	1.83092	0.0371	NOT	0.846224	0.165	NOT	1.03558	0.337	NOT	1.13672	0.364	NOT	0.796428	0.0555	DIFF
TU0605	1	+	17975964	17981492			AT1G48620.1		2180.56	1.38e-13	2036.41	4.34e-10	2382.07	1.02e-10	2297.9	7.09e-12	0.948936	0.435	NOT	1756.25	1.46e-09	1.15952	0.142	NOT	2008.68	6.97e-06	1.18589	0.367	NOT	0.933893	0.396	NOT	1.09241	0.277	NOT	0.764285	0.244	NOT	0.874137	0.465	NOT
TU0606	1	+	18063393	18063928			AT1G48830.1		790.604	1.89e-06	519.932	1.55e-07	769.458	5.25e-09	808.35	1.61e-06	0.978047	0.343	NOT	1138.88	6.25e-12	0.456529	0.159	NOT	572.865	2.95e-07	1.34318	0.383	NOT	0.657639	0.238	NOT	0.973253	0.338	NOT	1.40889	0.291	NOT	0.708684	0.341	NOT
TU0607	1	-	18078132	18078817					571.33	1.16e-11	300.87	2.04e-07	364.54	1.45e-08	267.359	0.000734498	2.13694	0.0104	NOT	337.313	1.6e-05	0.891961	0.274	NOT	597.866	5.91e-11	0.609735	0.0628	NOT	0.526613	0.0128	DIFF	0.638055	0.0591	NOT	1.26165	0.197	NOT	2.23619	0.0175	DIFF
TU0608	1	-	18136593	18139013			AT1G49010.1,AT1G49015.1		420.568	6.3e-17	505.907	2.11e-13	319.993	7.71e-08	402.524	4.95e-13	1.04483	0.476	NOT	474.382	2.95e-14	1.06645	0.411	NOT	340.003	6.13e-08	0.941148	0.118	NOT	1.20291	0.318	NOT	0.760859	0.0241	DIFF	1.17852	0.211	NOT	0.844678	0.165	NOT
TU0609	1	+	18178297	18180699			AT1G49130.1,AT1G49140.1		363.628	1.71e-09	360.611	3.02e-10	323.259	3.87e-06	360.756	6.88e-12	1.00796	0.446	NOT	334.555	4.32e-08	1.07788	0.149	NOT	321.098	1.45e-09	1.00673	0.448	NOT	0.991703	0.436	NOT	0.888983	0.301	NOT	0.927372	0.126	NOT	0.89007	0.271	NOT
TU0610	1	-	18220333	18223363			AT1G49240.1,AT1G49245.1		810.702	5.42e-20	777.293	3.14e-20	725.778	3.33e-18	989.056	6.87e-18	0.819672	0.372	NOT	813.835	2.36e-13	0.955099	0.444	NOT	771.788	7.25e-15	0.940385	0.319	NOT	0.95879	0.226	NOT	0.895246	0.138	NOT	0.82284	0.174	NOT	0.780328	0.133	NOT
TU0611	1	+	18231011	18234285			AT1G49270.1		508.315	1.63e-09	419.547	2.3e-09	483.411	3.51e-10	335.351	4.75e-06	1.51577	0.0587	NOT	470.012	1.02e-06	0.89263	0.407	NOT	399.251	2.51e-05	1.21079	0.333	NOT	0.825368	0.262	NOT	0.951007	0.273	NOT	1.40155	0.249	NOT	1.19055	0.356	NOT
TU0612	1	+	18236363	18236686			AT1G49290.1		1637.81	5.38e-07	1674.68	2.08e-09	1914.9	1.48e-05	1585.36	1.54e-08	1.03308	0.322	NOT	1302.77	2.23e-05	1.28548	0.13	NOT	1790.66	4.86e-11	1.06938	0.367	NOT	1.02251	0.497	NOT	1.16918	0.386	NOT	0.82175	0.249	NOT	1.1295	0.257	NOT
TU0613	1	-	18280489	18280845			AT1G49380.1		478.901	3.09e-09	535.912	0.0036436	183.84	0.0350714	316.494	0.00016849	1.51314	0.0337	NOT	389.651	0.000995665	1.37536	0.227	NOT	259.763	0.0809609	0.707722	0.199	NOT	1.11905	0.317	NOT	0.383879	0.00102	DIFF	1.23115	0.489	NOT	0.820752	0.265	NOT
TU0614	1	+	18318276	18319361			AT1G49480.1		350.842	1.19e-07	232.938	0.00518235	258.07	8.2e-12	376.812	2.43e-17	0.93108	0.241	NOT	174.566	0.00362105	1.33438	0.174	NOT	221.373	0.00916876	1.16577	0.132	NOT	0.66394	0.0812	NOT	0.735573	0.094	NOT	0.463271	0.000867	DIFF	0.587489	0.00102	DIFF
TU0615	1	+	18321309	18322940			AT1G49490.1		940.322	4.44e-26	678.954	1.22e-11	769.183	2.03e-11	629.996	3.23e-14	1.49258	0.0355	NOT	697.883	1.54e-13	0.972877	0.495	NOT	633.368	1.08e-19	1.21443	0.332	NOT	0.722044	0.0742	NOT	0.818	0.0924	NOT	1.10776	0.369	NOT	1.00535	0.499	NOT
TU0616	1	+	18369254	18370240			AT1G49620.1		905.75	4.81e-06	680.372	1.54e-08	534.111	3.81e-06	1060.38	1e-10	0.854175	0.201	NOT	721.288	3.19e-06	0.943274	0.167	NOT	574.087	0.000115942	0.930366	0.291	NOT	0.75117	0.284	NOT	0.589689	0.0937	NOT	0.680217	0.0126	DIFF	0.541397	0.0425	DIFF
TU0617	1	+	18406472	18406911			AT1G49730.1		683.861	2.17e-19	459.487	0.000911038	604.834	4.86e-07	616.305	3.13e-08	1.10961	0.144	NOT	315.825	0.000542432	1.45488	0.209	NOT	451.21	5.41e-07	1.34047	0.152	NOT	0.671901	0.0311	NOT	0.88444	0.212	NOT	0.512449	0.132	NOT	0.732121	0.229	NOT
TU0618	1	-	18412412	18412794			AT1G49740.1		538.634	4.55e-08	645.835	2.72e-09	481.868	7.59e-06	595.122	0.00023454	0.905082	0.378	NOT	719.231	1.55e-08	0.897952	0.333	NOT	585.084	1.88e-05	0.823588	0.341	NOT	1.19902	0.286	NOT	0.894611	0.374	NOT	1.20854	0.234	NOT	0.983133	0.488	NOT
TU0619	1	+	18414716	18416482			AT1G49750.1		449.767	2.77e-11	400.472	8.1e-12	307.597	1.8e-09	356.736	4.86e-11	1.26078	0.414	NOT	334.805	8.75e-07	1.19614	0.0392	NOT	252.719	6.3e-05	1.21715	0.172	NOT	0.890399	0.257	NOT	0.683903	0.205	NOT	0.938523	0.17	NOT	0.70842	0.0403	DIFF
TU0620	1	-	18420012	18423805			AT1G49760.1		594.773	2.41e-19	476.573	5.26e-10	450.661	2.35e-10	551.732	1.67e-13	1.07801	0.276	NOT	471.108	3.22e-10	1.0116	0.154	NOT	411.63	2.99e-11	1.09482	0.209	NOT	0.801269	0.114	NOT	0.757703	0.1	NOT	0.853871	0.0603	NOT	0.746069	0.0837	NOT
TU0621	1	+	18432725	18434092			AT1G49780.1		419.594	1.44e-09	441.768	1.14e-07	302.747	1.07e-05	456.533	1.08e-08	0.919088	0.285	NOT	444.713	1.09e-11	0.993378	0.465	NOT	431.683	1.07e-13	0.701318	0.0916	NOT	1.05285	0.439	NOT	0.721524	0.054	NOT	0.974109	0.37	NOT	0.945568	0.416	NOT
TU0622	1	-	18466489	18468083			AT1G49870.1,AT1G49880.1		381.924	2.61e-05	492.02	6.05e-09	366.687	1.16e-06	266.098	0.0117653	1.43528	0.249	NOT	326.553	0.000839396	1.50671	0.428	NOT	447.025	1.4e-06	0.820283	0.38	NOT	1.28827	0.488	NOT	0.960105	0.396	NOT	1.22719	0.298	NOT	1.67993	0.249	NOT
TU0623	1	-	18521953	18523407			AT1G50010.1		841.578	6.14e-15	581.7	8.03e-10	579.213	7.14e-12	763.48	4.02e-11	1.10229	0.393	NOT	656.237	3.56e-12	0.886418	0.234	NOT	476.011	2.83e-08	1.21681	0.33	NOT	0.691202	0.0718	NOT	0.688246	0.0987	NOT	0.859534	0.302	NOT	0.623475	0.06	DIFF
TU0624	1	+	18570169	18573070					607.233	2.31e-25	769.006	1.28e-25	541.855	2.95e-23	722.437	2.99e-26	0.840534	0.23	NOT	677.282	1.96e-28	1.13543	0.0848	NOT	805.156	1.46e-29	0.672981	0.192	NOT	1.26641	0.118	NOT	0.892335	0.362	NOT	0.937496	0.171	NOT	1.1145	0.32	NOT
TU0625	1	+	18618035	18620771			AT1G50250.1		391.052	1.02e-14	436.99	5.25e-13	373.923	2.12e-12	429.313	2.77e-18	0.910879	0.12	NOT	337.066	8.72e-11	1.29645	0.0982	NOT	283.215	1.78e-09	1.32028	0.203	NOT	1.11747	0.445	NOT	0.956198	0.245	NOT	0.785129	0.00367	DIFF	0.659694	0.00249	DIFF
TU0626	1	+	18670886	18671410			AT1G50390.1		270.019	6.35e-05	917.025	9.28e-12	374.961	4.85e-06	285.689	0.00576218	0.94515	0.453	NOT	2021.06	6.82e-16	0.453735	0.0109	NOT	443.913	4.15e-09	0.844672	0.482	NOT	3.39615	0.000778	DIFF	1.38865	0.0863	NOT	7.07434	1.7e-06	DIFF	1.55383	0.0909	NOT
TU0627	1	-	18700566	18701128			AT1G50460.1		1074.72	3.63e-11	686.863	1.08e-06	528.469	8.8e-06	653.294	1.01e-06	1.64508	0.0481	NOT	614.415	1.08e-05	1.11791	0.329	NOT	684.877	1.72e-06	0.771626	0.378	NOT	0.639109	0.0518	NOT	0.491727	0.0155	DIFF	0.940488	0.326	NOT	1.04834	0.423	NOT
TU0628	1	+	18751910	18752200					5670.5	4.41e-20	3614.21	4.1e-20	6137.97	5.65e-13	4340.07	4.76e-20	1.30655	0.494	NOT	2663.93	4e-25	1.35672	0.335	NOT	3813.18	1.41e-20	1.60967	0.4	NOT	0.637371	0.406	NOT	1.08244	0.412	NOT	0.613799	0.238	NOT	0.878599	0.45	NOT
TU0629	1	-	18753877	18754971			AT1G50620.1		439.784	1.55e-14	634.745	2.67e-16	448.461	7.93e-09	397.381	6.93e-11	1.10671	0.311	NOT	526.747	2.39e-16	1.20503	0.355	NOT	538.247	1.55e-14	0.833188	0.298	NOT	1.44331	0.466	NOT	1.01973	0.173	NOT	1.32555	0.251	NOT	1.35449	0.164	NOT
TU0630	1	+	18756801	18757616			AT1G50630.1		452.787	1.07e-11	643.474	1.21e-12	334.882	5.84e-05	385.363	3.59e-06	1.17496	0.165	NOT	1126.17	2e-19	0.571383	0.021	NOT	457.916	1.84e-07	0.731318	0.0486	NOT	1.42114	0.228	NOT	0.739602	0.0383	NOT	2.92236	0.000182	DIFF	1.18827	0.189	NOT
TU0631	1	+	18760969	18762309			AT1G50640.1		512.558	3.19e-11	484.392	2.85e-11	479.01	1.57e-07	369.863	1.69e-06	1.38581	0.116	NOT	636.874	3.96e-11	0.760577	0.218	NOT	406.806	5.65e-07	1.17749	0.23	NOT	0.945048	0.267	NOT	0.934548	0.313	NOT	1.72192	0.109	NOT	1.09988	0.456	NOT
TU0632	1	-	18776433	18778373			AT1G50660.1		783.643	8.4e-14	603.816	9.94e-08	595.03	1.28e-09	797.555	3.7e-10	0.982557	0.494	NOT	645.712	2.91e-09	0.935117	0.305	NOT	550.446	5.1e-08	1.081	0.401	NOT	0.770524	0.0994	NOT	0.759313	0.141	NOT	0.809614	0.224	NOT	0.690167	0.0807	NOT
TU0633	1	+	18781290	18782543			AT1G50680.1		336.86	6.58e-05	346.589	0.00524552	479.597	1.58e-10	305.511	0.00189729	1.10261	0.47	NOT	302.855	0.000230043	1.14441	0.398	NOT	286.052	0.00133526	1.67661	0.197	NOT	1.02888	0.456	NOT	1.42373	0.344	NOT	0.991306	0.444	NOT	0.936307	0.338	NOT
TU0634	1	-	18874201	18876396			AT1G50920.1		471.248	5.2e-13	530.233	3.34e-09	444.728	1.27e-07	698.215	5.77e-14	0.674933	0.113	NOT	612.675	2.28e-13	0.865439	0.398	NOT	530.383	1.17e-12	0.838503	0.19	NOT	1.12517	0.411	NOT	0.943724	0.285	NOT	0.877488	0.144	NOT	0.759627	0.151	NOT
TU0635	1	+	18933494	18936266			AT1G51080.1		1015.44	5.84e-17	603.158	1.09e-13	610.012	1.04e-14	586.152	1.08e-08	1.73238	0.0531	NOT	523.88	1.46e-09	1.15133	0.244	NOT	554.735	7.47e-14	1.09965	0.339	NOT	0.593987	0.0543	NOT	0.600737	0.139	NOT	0.893761	0.272	NOT	0.946401	0.414	NOT
TU0636	1	-	18937813	18939213			AT1G51100.1,AT1G51110.1		574.588	3.84e-16	611.96	7.66e-13	380.526	2.69e-11	476.432	7.49e-07	1.20602	0.191	NOT	527.314	2.03e-09	1.16052	0.158	NOT	502.018	9.24e-10	0.757993	0.486	NOT	1.06504	0.366	NOT	0.662259	0.0995	NOT	1.1068	0.434	NOT	1.0537	0.318	NOT
TU0637	1	-	18989352	18990246			AT1G51200.1		1448.06	1.18e-21	1318.91	1.75e-17	982.962	1.13e-13	1113.93	2.23e-23	1.29996	0.39	NOT	1471.37	1.71e-17	0.896382	0.339	NOT	1166.65	4.95e-18	0.842551	0.109	NOT	0.910812	0.306	NOT	0.678813	0.0215	DIFF	1.32088	0.362	NOT	1.04733	0.252	NOT
TU0638	1	-	19056373	19057071			AT1G51402.1		258.725	9.24e-10	306.259	1.39e-09	295.365	1.4e-05	371.98	3.58e-10	0.695535	0.0962	NOT	471.554	9.42e-17	0.649468	0.205	NOT	130.98	1.95e-08	2.25504	0.217	NOT	1.18372	0.482	NOT	1.14162	0.435	NOT	1.26769	0.348	NOT	0.352116	0.0249	DIFF
TU0639	1	+	19102473	19103281			AT1G51500.1		549.492	1.21e-09	402.489	1.22e-11	286.626	9.85e-07	678.992	1.23e-12	0.809276	0.271	NOT	379.946	1.13e-08	1.05933	0.323	NOT	205.219	0.0351072	1.39668	0.445	NOT	0.732475	0.148	NOT	0.52162	0.00471	DIFF	0.559574	0.017	DIFF	0.302241	0.000511	DIFF
TU0640	1	+	19125767	19127732			AT1G51570.1		366.502	1.11e-08	439.49	2.21e-11	316.059	1.28e-07	441.112	2.78e-17	0.830859	0.311	NOT	260.733	3.18e-05	1.68559	0.0572	NOT	311.221	1.2e-08	1.01555	0.495	NOT	1.19915	0.493	NOT	0.862366	0.185	NOT	0.591081	0.0157	DIFF	0.705537	0.0771	NOT
TU0641	1	+	19146205	19146920			AT1G51630.1		971.022	0.000473709	829.116	1.18e-08	1007.37	0.0257743	1989.79	7.15e-12	0.488002	0.079	NOT	913.204	0.000436076	0.90792	0.273	NOT	629.743	8.07e-05	1.59965	0.317	NOT	0.853859	0.393	NOT	1.03743	0.402	NOT	0.458945	0.107	NOT	0.316487	0.0355	DIFF
TU0642	1	-	19172606	19173997			AT1G51690.1		278.909	0.000395408	435.243	8.77e-09	287.741	7.38e-05	427.8	7.22e-09	0.651961	0.0388	NOT	290.658	0.00064951	1.49744	0.0185	NOT	256.281	6.73e-05	1.12276	0.472	NOT	1.56052	0.0211	NOT	1.03167	0.292	NOT	0.679425	0.0338	DIFF	0.599067	0.0717	NOT
TU0643	1	-	19197514	19198182			AT1G51745.1		917.226	1.18e-12	607.705	1.62e-07	726.104	1.1e-06	712.029	1.4e-07	1.28819	0.474	NOT	866.167	1.23e-06	0.701603	0.368	NOT	601.082	1.9e-11	1.20799	0.296	NOT	0.662547	0.117	NOT	0.79163	0.395	NOT	1.21648	0.222	NOT	0.844182	0.443	NOT
TU0644	1	-	19308941	19310210			AT1G51950.1		327.15	1.54e-08	382.781	2.56e-12	289.086	1.14e-05	383.393	2.34e-08	0.853302	0.417	NOT	348.704	4.7e-08	1.09772	0.123	NOT	215.841	0.00133586	1.33935	0.175	NOT	1.17005	0.322	NOT	0.88365	0.177	NOT	0.909521	0.189	NOT	0.562976	0.0242	DIFF
TU0645	1	+	19337817	19338979			AT1G52000.1		654.915	7.56e-12	524.012	8.56e-09	650.44	8.63e-15	1089.66	5.1e-16	0.601027	0.0421	NOT	357.505	1.12e-08	1.46575	0.0635	NOT	373.128	7.51e-08	1.74321	0.0211	NOT	0.800122	0.219	NOT	0.993167	0.495	NOT	0.328089	0.000105	DIFF	0.342426	0.000604	DIFF
TU0646	1	+	19386973	19388264			AT1G52100.1		583.28	2.59e-10	338.79	6.74e-06	266.887	0.0279491	1193.21	2.27e-21	0.488833	0.0156	NOT	464.758	1.8e-09	0.72896	0.0993	NOT	303.64	8.88e-06	0.878959	0.119	NOT	0.580836	0.0149	DIFF	0.457562	0.000846	DIFF	0.389502	0.0034	DIFF	0.254473	0.000156	DIFF
TU0647	1	-	19441493	19442440			AT1G52190.1		1505.2	9.18e-18	959.277	2.43e-12	593.596	2.35e-07	3366.3	6.15e-23	0.447138	0.00205	NOT	674.423	3.56e-08	1.42237	0.394	NOT	688.062	3.35e-09	0.862707	0.233	NOT	0.637309	0.0718	NOT	0.394364	0.0458	NOT	0.200345	8.62e-05	DIFF	0.204397	9.15e-05	DIFF
TU0648	1	+	19457601	19458272			AT1G52220.1		688.062	3.31e-10	478.734	4e-09	358.342	1.38e-07	980.51	1.5e-17	0.701739	0.163	NOT	810.845	1.97e-12	0.590414	0.0618	NOT	793.078	9.1e-13	0.451837	0.0126	NOT	0.695772	0.126	NOT	0.520799	0.00357	DIFF	0.826962	0.309	NOT	0.808842	0.157	NOT
TU0649	1	-	19458482	19459347			AT1G52230.1		2920.67	1.42e-14	1866.55	6.6e-15	1263.29	9.6e-13	2023.33	1.29e-14	1.4435	0.375	NOT	1882.21	1.77e-14	0.99168	0.418	NOT	1152.34	1.24e-13	1.09628	0.124	NOT	0.639083	0.375	NOT	0.432534	0.0666	NOT	0.930254	0.215	NOT	0.569526	0.22	NOT
TU0650	1	-	19487843	19490951			AT1G52320.1		451.625	2.69e-11	588.378	3.19e-16	542.584	2.48e-13	669.26	2.6e-11	0.674812	0.408	NOT	748.999	2.39e-14	0.785552	0.314	NOT	466.615	1.98e-09	1.16281	0.467	NOT	1.3028	0.298	NOT	1.2014	0.433	NOT	1.11915	0.26	NOT	0.69721	0.481	NOT
TU0651	1	-	19508858	19509611			AT1G52360.1		543.056	3.84e-16	358.262	4.04e-05	654.528	2.78e-07	754.183	1.19e-10	0.720059	0.446	NOT	476.398	1.95e-05	0.752022	0.482	NOT	310.748	0.000210898	2.1063	0.132	NOT	0.659715	0.0764	NOT	1.20527	0.26	NOT	0.631674	0.0588	NOT	0.412033	0.0312	DIFF
TU0652	1	-	19513625	19515054			AT1G52380.1		854.031	1.35e-21	850.488	3.33e-15	659.7	2.64e-15	990.817	9.11e-17	0.861946	0.351	NOT	835.01	9.75e-17	1.01854	0.397	NOT	616.857	3.37e-14	1.06945	0.235	NOT	0.995851	0.28	NOT	0.772454	0.225	NOT	0.842749	0.253	NOT	0.622574	0.0326	DIFF
TU0653	1	-	19518868	19519242			AT1G52400.1		403.419	0.00133283	395.22	2.8e-05	314.829	0.622493	725.246	2.12e-06	0.556251	0.0807	NOT	691.896	1.84e-09	0.571213	0.0138	NOT	345.882	0.0570135	0.910221	0.213	NOT	0.979676	0.371	NOT	0.780402	0.0585	NOT	0.954016	0.424	NOT	0.476917	0.0244	DIFF
TU0654	1	-	19519877	19520438			AT1G52400.1		205.298	9.09e-05	300.927	5.92e-06	256.09	0.00133525	1225.28	1.21e-12	0.167552	0.00138	NOT	430.606	2.56e-07	0.698845	0.127	NOT	607.088	0.000286063	0.421833	0.0594	NOT	1.46581	0.286	NOT	1.24741	0.368	NOT	0.351435	0.0723	NOT	0.495469	0.0156	DIFF
TU0655	1	-	19521020	19521740			AT1G52400.1		533.601	2.62e-06	357.737	2.08e-05	213.377	0.0374947	1863.6	3.06e-17	0.286328	6.05e-05	DIFF	962.086	1.09e-07	0.371835	0.13	NOT	364.467	0.000483102	0.585449	0.0372	NOT	0.67042	0.0903	NOT	0.399881	0.000347	DIFF	0.516251	0.000658	DIFF	0.195571	5.7e-07	DIFF
TU0656	1	-	19528154	19529183			AT1G52410.1		339.987	2.03e-05	322.815	0.000236064	268.072	1.04e-05	401.927	1.02e-11	0.845892	0.331	NOT	336.077	0.000862243	0.960539	0.475	NOT	295.254	0.000229719	0.907937	0.335	NOT	0.949492	0.236	NOT	0.788477	0.313	NOT	0.836164	0.145	NOT	0.734596	0.107	NOT
TU0657	1	-	19532389	19534790			AT1G52420.1		394.198	8.05e-12	490.757	2.55e-10	388.178	1.29e-05	448.992	6.25e-12	0.877962	0.111	NOT	436.696	1.68e-10	1.1238	0.125	NOT	411.434	2.03e-14	0.943476	0.0413	NOT	1.24495	0.149	NOT	0.984728	0.169	NOT	0.972614	0.0996	NOT	0.91635	0.309	NOT
TU0658	1	+	19577435	19581163			AT1G52560.1		458.852	0.00316153	2918.36	1.45e-18	756.425	2.03e-06	256.797	0.0094181	1.78683	0.281	NOT	3817.8	4.64e-20	0.764409	0.172	NOT	1727.15	2.63e-13	0.437961	0.00238	NOT	6.36013	1.64e-07	DIFF	1.64852	0.227	NOT	14.867	1.65e-09	DIFF	6.72574	3.36e-05	DIFF
TU0659	1	+	19610032	19610819			AT1G52630.1		643.238	1.21e-18	741.853	2.46e-13	883.44	1.97e-16	323.063	1.79e-07	1.99106	0.0387	NOT	372.613	2.45e-07	1.99095	0.044	NOT	617.818	1.85e-09	1.42994	0.139	NOT	1.15331	0.234	NOT	1.37343	0.141	NOT	1.15338	0.284	NOT	1.91238	0.0392	DIFF
TU0660	1	-	19689374	19692055			AT1G52870.1		371.774	1.54e-05	712.976	1.37e-16	424.696	2.48e-06	346.353	1.18e-07	1.0734	0.362	NOT	590.883	3.4e-10	1.20663	0.359	NOT	428.192	2.01e-07	0.991835	0.382	NOT	1.91777	0.037	NOT	1.14235	0.431	NOT	1.70601	0.0418	DIFF	1.23629	0.202	NOT
TU0661	1	-	19743432	19743872			AT1G52980.1		2238.88	6.06e-18	2731.43	1.01e-12	1338.48	2.82e-12	3206.09	3.24e-12	0.698321	0.288	NOT	1905.01	1.64e-09	1.43381	0.475	NOT	1144.44	1.09e-08	1.16955	0.394	NOT	1.22	0.288	NOT	0.597835	0.0823	NOT	0.594185	0.209	NOT	0.356958	0.0323	DIFF
TU0662	1	-	19850184	19851238			AT1G53210.1		475.41	8.72e-06	485.941	9.8e-09	455.384	6.6e-10	681.297	1.21e-06	0.697801	0.161	NOT	523.673	1.07e-09	0.927947	0.2	NOT	437.271	5.25e-10	1.04142	0.393	NOT	1.02215	0.301	NOT	0.957876	0.42	NOT	0.768641	0.311	NOT	0.641821	0.074	NOT
TU0663	1	+	19858325	19858947			AT1G53240.1		1691.08	1.59e-16	1600.01	1.22e-19	1589.46	5.25e-15	2002.48	4.14e-17	0.844493	0.422	NOT	1356.55	1.42e-12	1.17947	0.187	NOT	1576.33	1.74e-12	1.00833	0.469	NOT	0.946147	0.487	NOT	0.939908	0.368	NOT	0.677435	0.159	NOT	0.787189	0.318	NOT
TU0664	1	-	19885838	19886474			AT1G53300.1		614.91	5.84e-06	359.304	0.0136734	543.637	1.35e-09	631.531	2.05e-08	0.973681	0.369	NOT	377.582	0.00119035	0.951592	0.48	NOT	443.192	1.51e-06	1.22664	0.349	NOT	0.58432	0.0826	NOT	0.884092	0.277	NOT	0.597884	0.136	NOT	0.701774	0.271	NOT
TU0665	1	+	19894579	19895519			AT1G53320.1		1151.79	1.58e-13	809.761	1.65e-08	869.074	1.45e-11	1168.23	7.87e-10	0.985927	0.476	NOT	1252.77	5.22e-10	0.646376	0.361	NOT	762.13	7.44e-12	1.14032	0.439	NOT	0.703046	0.157	NOT	0.754542	0.275	NOT	1.07237	0.352	NOT	0.65238	0.305	NOT
TU0666	1	-	19954014	19954403			AT1G53440.1		1031.04	5.29e-11	821.776	1.24e-09	1031.72	4.44e-12	824.433	9.16e-09	1.2506	0.239	NOT	602.832	0.000153476	1.36319	0.092	NOT	369.068	4.48e-08	2.79547	0.0133	NOT	0.797036	0.318	NOT	1.00066	0.401	NOT	0.731208	0.155	NOT	0.447663	0.0576	DIFF
TU0667	1	+	19970690	19976028			AT1G53500.1		547.223	3.68e-17	507.597	9.53e-15	414.582	1.96e-10	501.564	4.16e-11	1.09103	0.109	NOT	435.351	4.91e-11	1.16595	0.299	NOT	406.022	1.24e-15	1.02108	0.0527	NOT	0.927587	0.157	NOT	0.757611	0.0136	DIFF	0.867987	0.371	NOT	0.809512	0.304	NOT
TU0668	1	-	19983888	19984806			AT1G53540.1		761.783	4.87e-09	2881.93	6.75e-29	2888.27	7.23e-21	981.02	3e-07	0.776521	0.315	NOT	2460.28	5.17e-23	1.17138	0.114	NOT	2484.33	2.46e-26	1.1626	0.309	NOT	3.78314	5.03e-05	DIFF	3.79146	0.000317	DIFF	2.50788	0.00749	DIFF	2.53239	0.000203	DIFF
TU0669	1	+	19985107	19985207			AT1G53541.1		5180.9	8.37e-09	2357.81	1.49e-11	6936.59	8.63e-15	3413.59	2.38e-07	1.51773	0.253	NOT	3297.53	5.93e-12	0.715023	0.282	NOT	6596.96	2.31e-15	1.05148	0.395	NOT	0.455097	0.2	NOT	1.33888	0.2	NOT	0.966001	0.447	NOT	1.93256	0.2	NOT
TU0670	1	-	20080356	20081376	AT1G53780	AT1G53780			561.989	0.000148216	812.084	1.31e-06	556.42	3.3e-08	603.648	0.000266133	0.930988	0.222	NOT	713.522	2.18e-11	1.13813	0.339	NOT	829.263	6.86e-09	0.670981	0.0398	NOT	1.44502	0.199	NOT	0.990091	0.458	NOT	1.18202	0.308	NOT	1.37375	0.0657	DIFF
TU0671	1	-	20103019	20107107			AT1G53830.1		573.844	2.23e-08	453.803	5.26e-09	383.153	4.05e-06	714.291	2.52e-11	0.803376	0.356	NOT	1326.06	1.06e-19	0.342219	0.00168	DIFF	688.063	8.21e-12	0.556857	0.0273	NOT	0.790812	0.439	NOT	0.667695	0.172	NOT	1.85647	0.0102	DIFF	0.963281	0.292	NOT
TU0672	1	-	20155902	20156384			AT1G53990.1		248.745	0.244824	381.975	0.000235834	428.566	4.86e-11	217.959	0.00185934	1.14125	0.457	NOT	277.927	0.0740131	1.37437	0.0788	NOT	223.265	0.246506	1.91954	0.00946	NOT	1.53561	0.0579	NOT	1.72291	0.0181	DIFF	1.27513	0.32	NOT	1.02434	0.356	NOT
TU0673	1	+	20158228	20159048			AT1G54000.1		440.627	2.73e-07	223.76	3.65e-07	215.06	0.231523	825.044	2.08e-14	0.534065	0.0076	NOT	203.317	0.0562505	1.10055	0.399	NOT	274.421	0.00606098	0.783686	0.446	NOT	0.507822	0.107	NOT	0.488077	0.0358	NOT	0.246432	9.49e-06	DIFF	0.332614	8.35e-06	DIFF
TU0674	1	+	20162552	20163372			AT1G54010.1		602.055	1.47e-07	309.111	6.23e-08	197.348	0.0259441	978.161	1.3e-15	0.615497	0.00482	NOT	369.812	2.29e-06	0.83586	0.216	NOT	319.68	0.001172	0.61733	0.0895	NOT	0.513427	0.0746	NOT	0.327791	0.0158	DIFF	0.378069	0.000196	DIFF	0.326817	5.34e-05	DIFF
TU0675	1	+	20174648	20175667			AT1G54040.1		3983.64	1.1e-49	3159.49	1.48e-36	2741.14	4.39e-41	4123.08	2.51e-48	0.966181	0.108	NOT	4083.32	2.7e-55	0.773755	0.0755	NOT	2141.29	5.01e-32	1.28013	0.387	NOT	0.793116	0.201	NOT	0.688099	0.0677	NOT	0.990357	0.26	NOT	0.519342	0.000706	DIFF
TU0676	1	+	20177198	20177484					107.954	0.246379	188.707	0.0919724	300.593	0.0225222	591.375	4.01e-11	0.182547	0.000136	DIFF	198.183	0.00310926	0.952186	0.343	NOT	340.435	0.00102503	0.882967	0.424	NOT	1.74803	0.0103	DIFF	2.78445	0.0138	DIFF	0.335122	0.0366	DIFF	0.575667	0.0411	DIFF
TU0677	1	+	20183194	20183974			AT1G54050.1		213.408	0.0313688	680.184	1.45e-08	578.098	4.26e-11	289.051	0.0434812	0.738306	0.17	NOT	972.022	9.78e-12	0.699762	0.317	NOT	407.492	0.000265166	1.41867	0.0921	NOT	3.18725	0.00527	DIFF	2.70889	0.0219	DIFF	3.3628	0.0177	DIFF	1.40976	0.39	NOT
TU0678	1	+	20199115	20200464			AT1G54100.1		302.727	0.000101996	408.002	2.87e-08	307.075	2.3e-06	488.974	1.77e-09	0.619107	0.0217	NOT	393.037	1.46e-09	1.03808	0.458	NOT	349.846	3.73e-07	0.877743	0.478	NOT	1.34776	0.146	NOT	1.01436	0.426	NOT	0.803799	0.217	NOT	0.71547	0.0294	DIFF
TU0679	1	+	20205569	20205777					1680.46	9.5e-23	1169.64	4.96e-17	749.07	4.45e-13	2295.07	2.57e-24	0.732204	0.156	NOT	1282.39	1.54e-20	0.912078	0.425	NOT	2396.54	1.65e-29	0.312563	0.00921	NOT	0.696024	0.219	NOT	0.445753	0.0844	NOT	0.558759	0.0604	NOT	1.04421	0.376	NOT
TU0680	1	-	20210672	20211118			AT1G54120.1		589.922	0.00161342	827.634	7.07e-09	618.02	0.00990697	812.773	4.58e-05	0.725814	0.165	NOT	427.8	0.0136702	1.93463	0.101	NOT	347.047	0.00830296	1.7808	0.35	NOT	1.40295	0.11	NOT	1.04763	0.445	NOT	0.526346	0.178	NOT	0.426991	0.0677	NOT
TU0681	1	+	20313580	20314563			AT1G54410.1		5502.91	6.27e-18	2152.28	1.66e-09	3112.89	1.64e-14	5023.84	5.33e-20	1.09536	0.324	NOT	3106.98	1.11e-12	0.692724	0.0512	NOT	3458.9	2.08e-14	0.899965	0.246	NOT	0.391117	0.022	NOT	0.565681	0.0857	NOT	0.618447	0.163	NOT	0.688497	0.108	NOT
TU0682	1	+	20360769	20363392			AT1G54500.1		1106.28	1.38e-13	565.954	6.53e-05	659.099	1.96e-09	760.8	8.74e-15	1.4541	0.447	NOT	654.394	3.92e-11	0.864852	0.224	NOT	643.205	3.13e-14	1.02471	0.454	NOT	0.511583	0.0484	NOT	0.59578	0.132	NOT	0.860139	0.164	NOT	0.845432	0.175	NOT
TU0683	1	+	20395236	20396515			AT1G54590.1		778.791	1.3e-14	634.634	1.35e-07	626.857	3.29e-23	1042.76	2.28e-12	0.746855	0.33	NOT	595.908	3.66e-12	1.06499	0.261	NOT	781.407	3.21e-13	0.802216	0.226	NOT	0.814896	0.149	NOT	0.80491	0.188	NOT	0.571472	0.0214	DIFF	0.749364	0.227	NOT
TU0684	1	+	20400036	20400554			AT1G54610.1		797.368	1.82e-08	697.024	2.24e-06	529.692	3.62e-06	620.579	0.000166056	1.28488	0.296	NOT	639.623	5.07e-07	1.08974	0.224	NOT	717.1	8.13e-09	0.738658	0.193	NOT	0.874156	0.439	NOT	0.664301	0.22	NOT	1.03069	0.356	NOT	1.15553	0.275	NOT
TU0685	1	-	20413065	20415130					500.941	3.05e-09	312.007	2.31e-05	239.994	0.000874576	811.189	2.98e-17	0.617539	0.00196	NOT	365.23	0.000219614	0.854275	0.119	NOT	371.915	1.01e-10	0.645293	0.0232	NOT	0.622842	0.00407	DIFF	0.479086	0.000411	DIFF	0.45024	8.99e-06	DIFF	0.458481	6.28e-06	DIFF
TU0686	1	-	20434229	20435653			AT1G54740.1		1276.35	4.91e-13	1046.79	3.04e-15	724.191	3.01e-08	1066.42	1.53e-14	1.19685	0.274	NOT	891.457	4.16e-11	1.17425	0.0709	NOT	780.766	2.41e-13	0.927539	0.422	NOT	0.820143	0.394	NOT	0.567392	0.102	NOT	0.835934	0.0352	DIFF	0.732137	0.0201	DIFF
TU0687	1	+	20439894	20440908					484.973	4.07e-06	669.898	3.72e-13	886.058	6.68e-15	554.328	4.37e-09	0.874885	0.143	NOT	648.606	5.78e-10	1.03283	0.238	NOT	1180.07	9.78e-27	0.750852	0.0725	NOT	1.38131	0.0609	NOT	1.82703	0.0141	DIFF	1.17008	0.446	NOT	2.12883	0.00231	DIFF
TU0688	1	-	20443099	20443825			AT1G54780.1		879.657	1.05e-12	541.943	1.27e-07	752.218	1.81e-11	728.193	2.09e-09	1.208	0.408	NOT	474.521	8.66e-07	1.14208	0.231	NOT	475.029	3.98e-08	1.58352	0.284	NOT	0.616084	0.174	NOT	0.855126	0.357	NOT	0.651642	0.093	NOT	0.652339	0.255	NOT
TU0689	1	-	20451018	20451704			AT1G54820.1		523.6	1.04e-07	292.781	3.73e-07	455.739	2.01e-13	377.486	0.000143609	1.38707	0.355	NOT	251.998	0.0184713	1.16184	0.305	NOT	405.659	0.000449262	1.12345	0.32	NOT	0.559169	0.494	NOT	0.870395	0.221	NOT	0.667569	0.476	NOT	1.07463	0.228	NOT
TU0690	1	-	20462794	20463898			AT1G54870.1		352.45	3.83e-06	534.327	4.26e-11	401.46	1.88e-05	297.91	0.0035744	1.18308	0.271	NOT	313.658	0.00113374	1.70353	0.0163	NOT	300.018	0.00254547	1.33812	0.448	NOT	1.51604	0.144	NOT	1.13906	0.242	NOT	1.05286	0.299	NOT	1.00708	0.386	NOT
TU0691	1	-	20553122	20553894			AT1G55060.1		521.732	3.54e-07	334.265	0.000222839	516.201	2.64e-08	510.033	1.8e-09	1.02294	0.371	NOT	590.54	9.97e-08	0.566033	0.196	NOT	541.587	7.3e-08	0.953127	0.218	NOT	0.640683	0.146	NOT	0.989399	0.341	NOT	1.15785	0.334	NOT	1.06187	0.23	NOT
TU0692	1	+	20557245	20557956			AT1G55080.1		1022.21	3.11e-20	808.755	6.38e-15	923.34	5.45e-14	795.172	3.32e-12	1.28552	0.352	NOT	790.882	1.65e-15	1.0226	0.412	NOT	718.022	3.42e-14	1.28595	0.315	NOT	0.791183	0.282	NOT	0.903278	0.208	NOT	0.994605	0.321	NOT	0.902977	0.424	NOT
TU0693	1	+	20585794	20591036	AT1G55175	AT1G55175	AT1G55180.1		305.398	3.4e-16	227.448	4.22e-07	220.588	1.01e-06	267.375	2.77e-14	1.14221	0.169	NOT	241.939	2.81e-07	0.940105	0.413	NOT	231.23	1.92e-11	0.953977	0.244	NOT	0.744759	0.0302	NOT	0.722297	0.0205	DIFF	0.904868	0.236	NOT	0.864815	0.338	NOT
TU0694	1	+	20601713	20602368			AT1G55210.1		528.487	8.75e-08	546.568	7.98e-14	426.992	1.47e-08	567.758	1.57e-05	0.930831	0.457	NOT	1302.51	2.94e-14	0.419627	0.127	NOT	775.792	1.39e-11	0.550395	0.12	NOT	1.03421	0.272	NOT	0.807952	0.21	NOT	2.29413	0.0639	NOT	1.36641	0.386	NOT
TU0695	1	-	20618332	20618839			AT1G55260.1		829.849	1.09e-12	420.344	0.00087967	667.826	3.45e-10	721.45	1.92e-06	1.15025	0.26	NOT	404.853	2.26e-07	1.03826	0.323	NOT	468.031	3.84e-06	1.42688	0.0934	NOT	0.506531	0.00327	DIFF	0.804756	0.0518	NOT	0.561166	0.0114	DIFF	0.648737	0.00576	DIFF
TU0696	1	-	20620750	20621472			AT1G55265.1		440.24	1.59e-07	518.18	1.11e-09	661.35	2.09e-10	184.255	0.0663332	2.3893	0.055	NOT	344.39	1.77e-07	1.50463	0.109	NOT	341.809	0.000210898	1.93485	0.00836	NOT	1.17704	0.446	NOT	1.50225	0.0831	NOT	1.86909	0.397	NOT	1.85509	0.321	NOT
TU0697	1	+	20667981	20668293			AT1G55350.1		391.581	0.0072739	355.068	0.185263	204.442	0.244166	575.246	8.45e-09	0.680719	0.225	NOT	361.427	0.0587444	0.982406	0.199	NOT	204.748	0.264206	0.998505	0.466	NOT	0.906755	0.307	NOT	0.522094	0.349	NOT	0.6283	0.294	NOT	0.355931	0.086	NOT
TU0698	1	+	20670090	20670623			AT1G55360.1		497.028	1.19e-07	278.322	3.18e-05	486.049	1.47e-08	348.122	3.78e-07	1.42774	0.295	NOT	355.192	1.85e-07	0.783582	0.354	NOT	394.996	8.04e-10	1.23052	0.402	NOT	0.559972	0.178	NOT	0.977911	0.281	NOT	1.02031	0.498	NOT	1.13465	0.253	NOT
TU0699	1	-	20711315	20712323			AT1G55460.1		696.627	4.96e-09	580.037	2.87e-08	799.556	3.56e-10	666.918	4.28e-06	1.04455	0.361	NOT	825.283	4.6e-08	0.702834	0.291	NOT	824.848	1.45e-10	0.969337	0.189	NOT	0.832636	0.334	NOT	1.14775	0.332	NOT	1.23746	0.345	NOT	1.23681	0.19	NOT
TU0700	1	-	20717059	20718313			AT1G55480.1		1126.62	3.8e-14	600.198	4.53e-15	490.284	7.42e-07	845.396	9.11e-17	1.33265	0.373	NOT	1000.88	5.95e-11	0.59967	0.264	NOT	789.008	7.98e-12	0.621393	0.33	NOT	0.532742	0.0658	NOT	0.435181	0.0144	DIFF	1.18392	0.275	NOT	0.9333	0.0496	DIFF
TU0701	1	+	20719327	20719621			AT1G55490.1		2318.76	1.87e-20	2052.19	8.85e-21	1862.54	3.95e-18	2158.41	1e-21	1.07429	0.216	NOT	1541.74	9.36e-24	1.33109	0.281	NOT	1327.15	1.9e-18	1.40341	0.267	NOT	0.885038	0.309	NOT	0.803248	0.418	NOT	0.714294	0.156	NOT	0.614874	0.0711	NOT
TU0702	1	+	20733021	20734223			AT1G55530.1		360.024	2.29e-05	623.112	3.65e-08	469.923	5e-08	371.215	2.44e-07	0.969853	0.387	NOT	983.172	1.21e-19	0.633777	0.0156	NOT	595.552	1.64e-13	0.789055	0.102	NOT	1.73075	0.403	NOT	1.30525	0.487	NOT	2.64852	0.00209	DIFF	1.60433	0.0697	NOT
TU0703	1	+	20806419	20807220			AT1G55670.1		2422.66	1.88e-19	2527.4	1.65e-19	2000.81	3.5e-20	2371.43	2.88e-22	1.0216	0.359	NOT	2435.06	1.2e-23	1.03792	0.498	NOT	1910.18	1.2e-23	1.04745	0.384	NOT	1.04323	0.398	NOT	0.825873	0.483	NOT	1.02683	0.441	NOT	0.805497	0.186	NOT
TU0704	1	+	20808367	20809081			AT1G55680.1		2136.64	2.46e-12	2894.48	2.57e-10	1350.99	4.92e-13	2554.09	8.31e-13	0.836556	0.288	NOT	1734.77	4.28e-19	1.66851	0.401	NOT	722.431	6.33e-10	1.87006	0.371	NOT	1.35469	0.31	NOT	0.632297	0.315	NOT	0.679213	0.381	NOT	0.282853	0.062	DIFF
TU0705	1	+	20902249	20902692			AT1G55880.1		299.285	4.42e-05	414.126	1.37e-06	361.226	3.65e-06	403.746	4.99e-08	0.741271	0.224	NOT	305.663	0.000154944	1.35485	0.0952	NOT	536.204	4.2e-14	0.673673	0.161	NOT	1.38372	0.405	NOT	1.20696	0.15	NOT	0.757068	0.082	NOT	1.32807	0.0918	NOT
TU0706	1	-	20914656	20917378			AT1G55920.1		909.699	6.46e-17	945.814	2.44e-19	672.329	7.99e-12	789.067	3.98e-16	1.15288	0.295	NOT	989.931	5.42e-19	0.955434	0.395	NOT	711.391	9.46e-13	0.945091	0.376	NOT	1.0397	0.394	NOT	0.739068	0.197	NOT	1.25456	0.313	NOT	0.90156	0.272	NOT
TU0707	1	-	20921181	20922408			AT1G55928.1		1243.99	7.41e-14	1243.83	2.33e-10	1330.81	1.72e-13	1025.08	3.07e-11	1.21355	0.201	NOT	967.875	3.68e-14	1.28511	0.488	NOT	848.292	6.99e-14	1.56881	0.206	NOT	0.999871	0.407	NOT	1.06979	0.458	NOT	0.944195	0.29	NOT	0.827537	0.393	NOT
TU0708	1	-	20924862	20925857			AT1G55930.1		559.348	4.07e-13	561.123	6.55e-09	550.913	3.18e-12	509.726	0.000107118	1.09735	0.222	NOT	688.251	1.09e-11	0.815288	0.458	NOT	363.521	0.000754684	1.51549	0.0708	NOT	1.00317	0.374	NOT	0.98492	0.383	NOT	1.35024	0.336	NOT	0.713169	0.18	NOT
TU0709	1	+	20931478	20931827			AT1G55960.1		1270.42	7.96e-05	1335.23	1.31e-09	477.868	1.13e-05	605.627	2.25e-05	2.09769	0.321	NOT	1252.72	2.91e-07	1.06586	0.476	NOT	530.09	0.0684059	0.901485	0.24	NOT	1.05101	0.0884	NOT	0.37615	0.47	NOT	2.06847	0.055	NOT	0.875275	0.107	NOT
TU0710	1	+	20971780	20974362			AT1G56070.1		1029.98	4.01e-22	769.437	1.83e-20	665.447	1.69e-24	1338.08	4.15e-28	0.769745	0.0502	NOT	795.912	1.66e-22	0.966736	0.375	NOT	626.123	1.2e-16	1.06281	0.434	NOT	0.747041	0.146	NOT	0.646078	0.022	DIFF	0.594816	0.00867	DIFF	0.467926	7.2e-05	DIFF
TU0711	1	+	20988133	20988479			AT1G56110.1		1530.36	3.44e-12	1236.93	5.39e-11	1616.51	5.71e-07	1662.37	4.32e-10	0.920589	0.493	NOT	1067.12	5.39e-12	1.15913	0.236	NOT	1357.38	4.52e-13	1.1909	0.339	NOT	0.808261	0.326	NOT	1.05629	0.244	NOT	0.641927	0.0871	NOT	0.816533	0.228	NOT
TU0712	1	+	20990358	20991320			AT1G56110.1,AT1G56120.1		346.26	5.64e-07	345.716	0.00875343	509.887	8.3e-11	377.961	0.000192191	0.916126	0.366	NOT	398.704	4.89e-06	0.867099	0.0813	NOT	363.446	0.00470361	1.40292	0.13	NOT	0.998429	0.424	NOT	1.47256	0.0384	NOT	1.05488	0.189	NOT	0.961597	0.414	NOT
TU0713	1	-	21031918	21035970			AT1G56200.1		2575.05	2.32e-10	2868.19	1.3e-12	2681.12	2.22e-13	2547.88	1.96e-12	1.01066	0.446	NOT	2698.04	8.29e-13	1.06306	0.446	NOT	4114.44	6e-16	0.651637	0.193	NOT	1.11384	0.453	NOT	1.04119	0.435	NOT	1.05894	0.469	NOT	1.61485	0.208	NOT
TU0714	1	-	21039806	21040731			AT1G56210.1		430.003	2.74e-07	425.132	2.55e-10	314.676	0.000248706	321.73	0.0011822	1.33653	0.18	NOT	296.091	0.0116537	1.43582	0.164	NOT	357.863	7.03e-06	0.87932	0.349	NOT	0.988672	0.366	NOT	0.7318	0.138	NOT	0.920309	0.396	NOT	1.11231	0.459	NOT
TU0715	1	-	21046827	21048591			AT1G56220.1		4060.09	9.75e-18	1552.56	1.41e-12	2094.64	1.3e-11	2958.96	6.47e-19	1.37213	0.445	NOT	1524.76	1.17e-07	1.01823	0.4	NOT	2004.33	1.96e-12	1.04506	0.439	NOT	0.382395	0.11	NOT	0.51591	0.115	NOT	0.515303	0.0905	NOT	0.677377	0.174	NOT
TU0716	1	-	21055958	21056772					346.354	0.00244431	267.14	0.443262	7764.25	7.64e-22	449.483	0.17723	0.770561	0.34	NOT	536.203	2.34e-05	0.498207	0.0386	NOT	5854.82	2.2e-19	1.32613	0.166	NOT	0.771292	0.169	NOT	22.4171	2.57e-08	DIFF	1.19293	0.224	NOT	13.0257	7.7e-07	DIFF
TU0717	1	+	21076502	21078914			AT1G56280.1		3431.53	6.04e-16	3496.28	1.03e-14	1721.63	5.38e-12	3648.4	8.79e-12	0.940558	0.258	NOT	2172.25	9.04e-10	1.60952	0.22	NOT	2197.37	7.76e-18	0.783496	0.291	NOT	1.01887	0.462	NOT	0.501709	0.17	NOT	0.595398	0.41	NOT	0.602283	0.412	NOT
TU0718	1	+	21090224	21090782			AT1G56330.1		642.091	1.39e-11	726.359	9.78e-07	655.527	2.03e-11	633.178	6.41e-07	1.01408	0.15	NOT	1008.93	1.27e-09	0.71993	0.374	NOT	762.786	1.97e-10	0.859385	0.317	NOT	1.13124	0.431	NOT	1.02093	0.334	NOT	1.59344	0.138	NOT	1.20469	0.133	NOT
TU0719	1	+	21092018	21095799			AT1G56340.1		1141.85	2.03e-06	1774.07	5.29e-14	1837.21	5.42e-12	1299.85	1.62e-12	0.878448	0.231	NOT	2550.71	2.44e-12	0.69552	0.241	NOT	1813.32	6.33e-10	1.01317	0.424	NOT	1.55368	0.304	NOT	1.60898	0.143	NOT	1.96231	0.311	NOT	1.39502	0.466	NOT
TU0720	1	+	21111713	21114095					850.401	2.74e-12	1559.45	3.31e-16	1383.96	6.04e-17	755.388	3.45e-14	1.12578	0.311	NOT	1764.02	3.82e-17	0.884032	0.309	NOT	2663.6	1.66e-20	0.519583	0.275	NOT	1.83378	0.432	NOT	1.62742	0.335	NOT	2.33525	0.177	NOT	3.52613	0.0768	NOT
TU0721	1	-	21133575	21134225			AT1G56423.1		225.337	0.0434635	381.269	4.38e-06	212.753	0.00357445	279.616	9.96e-05	0.80588	0.416	NOT	450.975	9.96e-09	0.845433	0.46	NOT	307.163	1.88e-05	0.692639	0.0449	NOT	1.69199	0.0842	NOT	0.944155	0.17	NOT	1.61284	0.127	NOT	1.09852	0.286	NOT
TU0722	1	-	21140582	21141997			AT1G56430.1		341.154	1.79e-09	289.587	9.72e-05	303.276	1.98e-09	378.905	1.49e-11	0.900368	0.147	NOT	289.435	0.000537214	1.00053	0.243	NOT	183.949	8.5e-05	1.6487	0.0227	NOT	0.848845	0.0699	NOT	0.888971	0.295	NOT	0.763872	0.0236	DIFF	0.485475	8.67e-05	DIFF
TU0723	1	-	21145275	21145422					1354.49	3.52e-05	812.587	7.58e-08	949.708	6.69e-09	1497.79	5.41e-09	0.904326	0.442	NOT	1205.68	5.73e-09	0.673966	0.5	NOT	1769.56	4.32e-11	0.536692	0.0825	NOT	0.599921	0.351	NOT	0.701155	0.26	NOT	0.804973	0.26	NOT	1.18145	0.364	NOT
TU0724	1	+	21178591	21179123			AT1G56520.1		657.404	8.73e-10	548.773	0.000179945	588.432	1.04e-06	471.285	0.000216809	1.39492	0.395	NOT	744.637	3.5e-07	0.736967	0.0563	NOT	744.363	0.000240551	0.790518	0.255	NOT	0.834758	0.22	NOT	0.895084	0.318	NOT	1.58001	0.147	NOT	1.57943	0.365	NOT
TU0725	1	-	21211151	21211554			AT1G56600.1		679.133	0.000470977	1220.82	1.32e-10	889.914	5.42e-07	692.389	0.00457405	0.980855	0.374	NOT	1506.47	1.08e-06	0.810385	0.207	NOT	388.108	0.0464753	2.29295	0.0265	NOT	1.79762	0.0162	DIFF	1.31037	0.173	NOT	2.17576	0.16	NOT	0.560535	0.0829	NOT
TU0726	1	-	21242474	21243948			AT1G56660.1		520.892	7e-10	418.641	8.89e-05	1019.08	2.01e-16	527.999	8.46e-07	0.98654	0.353	NOT	620.088	2.21e-06	0.675132	0.385	NOT	389.293	1.7e-07	2.61777	0.0029	NOT	0.8037	0.169	NOT	1.95641	0.028	DIFF	1.17441	0.255	NOT	0.737299	0.336	NOT
TU0727	1	+	21366250	21367676			AT1G57680.1		509.094	1.52e-12	448.461	1.14e-07	356.697	1.56e-09	376.104	1.38e-05	1.3536	0.308	NOT	460.432	3.63e-15	0.974001	0.33	NOT	359.227	7.11e-12	0.992957	0.313	NOT	0.8809	0.322	NOT	0.700651	0.184	NOT	1.22421	0.292	NOT	0.955127	0.357	NOT
TU0728	1	-	21382365	21383932			AT1G57720.1		713.011	1.15e-07	548.06	1.77e-07	550.042	5.19e-10	922.342	1.41e-12	0.773044	0.0688	NOT	696.958	2.19e-07	0.78636	0.291	NOT	461.457	4.98e-06	1.19197	0.235	NOT	0.768656	0.263	NOT	0.771436	0.309	NOT	0.755639	0.0587	NOT	0.50031	0.0038	DIFF
TU0729	1	-	21506986	21507366			AT1G58070.1		1369.94	1.13e-10	1009.37	1.12e-07	962.629	9.09e-07	726.647	1.01e-06	1.88529	0.0238	NOT	972.746	9.2e-09	1.03765	0.317	NOT	1154.38	1.91e-11	0.833893	0.322	NOT	0.736799	0.0359	NOT	0.70268	0.0228	DIFF	1.33868	0.317	NOT	1.58864	0.265	NOT
TU0730	1	+	21516195	21517700			AT1G58100.1		409.258	1.71e-09	448.553	1.87e-11	325.587	3.62e-07	432.152	6.79e-10	0.947023	0.225	NOT	408.126	1.89e-10	1.09906	0.446	NOT	383.924	2.06e-06	0.848051	0.311	NOT	1.09602	0.426	NOT	0.795554	0.375	NOT	0.944404	0.318	NOT	0.8884	0.261	NOT
TU0731	1	-	21539884	21540289			AT1G58170.1		257.249	0.0262675	576.523	1.07e-09	333.157	0.018655	475.08	1.96e-09	0.541486	0.0427	NOT	571.496	0.000134049	1.0088	0.375	NOT	612.938	9.09e-06	0.543541	0.0422	NOT	2.24111	0.147	NOT	1.29508	0.2	NOT	1.20295	0.223	NOT	1.29018	0.437	NOT
TU0732	1	+	21541638	21541907			AT1G58180.1		451.863	6.61e-05	514.438	0.00344506	246.868	0.660026	518.13	1.24e-09	0.872104	0.402	NOT	585.959	3.27e-05	0.877942	0.157	NOT	361.018	0.0587397	0.683811	0.297	NOT	1.13848	0.183	NOT	0.546334	0.0111	DIFF	1.13091	0.43	NOT	0.696771	0.0441	DIFF
TU0733	1	+	21551894	21552641			AT1G58200.1		799.264	3.19e-11	898.082	7.62e-12	477.46	4.86e-11	1237.99	2.6e-13	0.645614	0.111	NOT	930.21	2.53e-11	0.965462	0.312	NOT	526.404	3.31e-06	0.907022	0.332	NOT	1.12364	0.22	NOT	0.597375	0.4	NOT	0.751387	0.178	NOT	0.425209	0.0355	DIFF
TU0734	1	+	21627462	21628526			AT1G58290.1		4737.81	8.42e-32	6641.96	1.9e-28	3316.43	8.55e-18	5459.77	3.64e-29	0.867767	0.261	NOT	5693.43	1.7e-23	1.1666	0.442	NOT	2657.62	5.58e-24	1.24789	0.405	NOT	1.40191	0.354	NOT	0.699992	0.0967	NOT	1.0428	0.392	NOT	0.486764	0.0166	DIFF
TU0735	1	-	21682978	21683869			AT1G58360.1		703.279	1.79e-09	481.344	1.89e-06	412.299	2.03e-06	608.573	3.78e-06	1.15562	0.291	NOT	326.635	0.00119035	1.47364	0.242	NOT	459.357	5.67e-05	0.897557	0.25	NOT	0.684428	0.212	NOT	0.586252	0.0917	NOT	0.536723	0.195	NOT	0.75481	0.408	NOT
TU0736	1	-	21737086	21737663			AT1G58520.1		436.036	9.65e-06	443.73	3.27e-08	376.971	0.00316303	465.719	3.7e-10	0.936264	0.127	NOT	490.574	0.000236915	0.904512	0.11	NOT	337.898	2.29e-06	1.11564	0.356	NOT	1.01765	0.204	NOT	0.864541	0.385	NOT	1.05337	0.0672	NOT	0.725541	0.238	NOT
TU0737	1	-	21888729	21889562			AT1G59580.1		658.183	1.79e-09	460.097	5.24e-08	474.15	2.35e-10	907.807	2.13e-12	0.725025	0.212	NOT	591.407	1.54e-08	0.77797	0.25	NOT	455.95	1.16e-08	1.03992	0.491	NOT	0.699041	0.151	NOT	0.720392	0.128	NOT	0.651468	0.0993	NOT	0.502254	0.033	DIFF
TU0738	1	-	21941938	21943336			AT1G59710.1		754.815	3.58e-22	1121.77	4.91e-22	1023.1	4.05e-18	721.703	2.07e-13	1.04588	0.186	NOT	898.256	1.46e-17	1.24883	0.071	NOT	719.014	1.66e-17	1.42292	0.0874	NOT	1.48615	0.0883	NOT	1.35543	0.218	NOT	1.24463	0.203	NOT	0.996274	0.343	NOT
TU0739	1	-	22031239	22031949			AT1G59840.1		445.732	3.1e-09	611.3	1.39e-09	285.974	0.00133525	534.074	1.23e-08	0.834588	0.176	NOT	409.316	6.33e-09	1.49347	0.162	NOT	248.557	0.000353615	1.15054	0.214	NOT	1.37145	0.374	NOT	0.641583	0.216	NOT	0.766403	0.0597	NOT	0.465398	0.0025	DIFF
TU0740	1	+	22033240	22033959			AT1G59850.1		334.438	1.87e-08	336.585	4.64e-07	452.977	3.62e-09	485.556	1.16e-06	0.688773	0.185	NOT	527.216	3.13e-14	0.63842	0.0467	NOT	394.695	5.45e-08	1.14766	0.426	NOT	1.00642	0.494	NOT	1.35444	0.205	NOT	1.0858	0.233	NOT	0.812872	0.428	NOT
TU0741	1	-	22035112	22035759			AT1G59860.1		307.569	0.000286862	2726.66	9.85e-12	856.635	3.84e-10	192.183	0.208229	1.6004	0.154	NOT	3019.95	2.22e-13	0.902882	0.323	NOT	2065.24	1.23e-10	0.414787	0.204	NOT	8.8652	0.00128	DIFF	2.78518	0.0145	DIFF	15.7139	2.39e-05	DIFF	10.7462	0.00046	DIFF
TU0742	1	-	22041260	22043546			AT1G59870.1		1178.14	2.7e-17	432.602	1.98e-09	458.69	8.86e-08	1326.83	2.1e-14	0.887936	0.385	NOT	602.071	9.9e-11	0.718523	0.179	NOT	497.412	1.39e-07	0.922153	0.211	NOT	0.367191	0.00585	DIFF	0.389334	0.00709	DIFF	0.453766	0.0338	DIFF	0.374888	0.0169	DIFF
TU0743	1	+	22096228	22100587			AT1G60000.1,AT1G60010.1		401.849	7.49e-10	512.471	1.49e-09	496.851	1.66e-08	478.537	2.84e-09	0.839745	0.24	NOT	497.09	1.54e-06	1.03094	0.102	NOT	458.11	5.66e-09	1.08457	0.372	NOT	1.27528	0.117	NOT	1.23641	0.328	NOT	1.03877	0.174	NOT	0.957314	0.489	NOT
TU0744	1	-	22222463	22227947	AT1G60260,AT1G60270	AT1G60260,AT1G60270			1651.49	3.18e-20	1317.96	5.68e-18	992.802	5.48e-19	1128.99	7.6e-19	1.4628	0.00381	NOT	934.727	1.03e-13	1.40999	0.0057	NOT	807.738	5.15e-16	1.22911	0.245	NOT	0.798043	0.0445	NOT	0.601155	0.000116	DIFF	0.827932	0.0576	NOT	0.715452	0.0176	DIFF
TU0745	1	+	22317894	22318496			AT1G60590.1		692.303	0.000295809	535.696	1.93e-09	414.272	3.05e-09	895.532	1.39e-09	0.773063	0.0584	NOT	337.366	0.0234668	1.58788	0.243	NOT	287.376	0.0299712	1.44157	0.0513	NOT	0.773788	0.445	NOT	0.598397	0.405	NOT	0.376721	0.00647	DIFF	0.3209	0.000899	DIFF
TU0746	1	+	22370583	22371710			AT1G60770.1		504.982	3.73e-07	404.931	4.48e-06	499.216	5.42e-09	595.721	9.93e-07	0.847682	0.125	NOT	520.218	9.85e-07	0.778387	0.205	NOT	510.17	6.33e-10	0.978529	0.35	NOT	0.801872	0.42	NOT	0.988582	0.478	NOT	0.873258	0.285	NOT	0.856391	0.231	NOT
TU0747	1	-	22413092	22414045			AT1G60870.1		2295.29	8.53e-33	1273.77	9.57e-22	1151.85	1.03e-20	1739.89	5.63e-23	1.31922	0.184	NOT	1147.86	1.26e-23	1.10969	0.351	NOT	1199.54	4.55e-23	0.960243	0.397	NOT	0.554949	0.0174	NOT	0.501832	0.009	DIFF	0.659731	0.0463	DIFF	0.689434	0.105	NOT
TU0748	1	+	22433462	22434450			AT1G60920.1		524.388	5.81e-05	663.825	1.8e-09	336.535	4.25e-07	448.263	1.83e-08	1.16982	0.364	NOT	364.741	1.84e-05	1.81999	0.0115	NOT	663.073	3.27e-06	0.507538	0.0323	NOT	1.2659	0.0309	NOT	0.641767	0.211	NOT	0.813676	0.281	NOT	1.47921	0.286	NOT
TU0749	1	+	22442941	22443704			AT1G60940.1		2868.53	3.07e-06	2690.1	1.49e-08	1815.81	5.71e-07	2995.18	2.84e-09	0.957715	0.41	NOT	2938.6	7.37e-12	0.915436	0.288	NOT	1867	2.87e-09	0.972582	0.41	NOT	0.937797	0.492	NOT	0.633011	0.288	NOT	0.98111	0.378	NOT	0.623335	0.467	NOT
TU0750	1	-	22575115	22577041			AT1G61210.1,AT1G61215.1		299	0.00276547	334.446	1.88e-05	276.857	0.0105709	303.168	6.45e-05	0.986252	0.292	NOT	328.95	0.000947368	1.01671	0.327	NOT	451.71	7.41e-09	0.612909	0.0118	NOT	1.11855	0.322	NOT	0.925943	0.475	NOT	1.08504	0.327	NOT	1.48997	0.0489	DIFF
TU0751	1	+	22582970	22584459	AT1G61230	AT1G61230			371.631	1.44e-09	414.838	5.45e-06	473.756	2.87e-11	293.889	6.71e-07	1.26453	0.191	NOT	254.121	0.000143403	1.63244	0.0316	NOT	553.145	4.56e-15	0.856477	0.125	NOT	1.11626	0.374	NOT	1.2748	0.192	NOT	0.864684	0.374	NOT	1.88216	0.0017	DIFF
TU0752	1	+	22693410	22694594			AT1G61500.1		603.16	1.46e-09	1201.93	0.000130845	534.33	0.000147759	560.079	7.33e-07	1.07692	0.345	NOT	855.888	7.16e-06	1.40431	0.386	NOT	618.073	6.22e-07	0.86451	0.464	NOT	1.99272	0.35	NOT	0.885884	0.291	NOT	1.52816	0.16	NOT	1.10355	0.449	NOT
TU0753	1	+	22695671	22696141			AT1G61500.1		236.503	0.015575	726.798	1.69e-17	418.913	8.69e-08	330.622	0.000601961	0.715327	0.149	NOT	392.87	5.47e-05	1.84997	0.00808	NOT	350.901	2.33e-06	1.19382	0.254	NOT	3.0731	0.000201	DIFF	1.77128	0.0274	DIFF	1.18828	0.455	NOT	1.06134	0.497	NOT
TU0754	1	-	22701053	22706776			AT1G61520.1		1000.13	6.82e-15	1461.08	5.28e-28	886.299	1.97e-15	1220.82	6.96e-21	0.819228	0.174	NOT	1595.36	9.19e-21	0.915831	0.395	NOT	1181.31	1.42e-18	0.750268	0.139	NOT	1.46089	0.104	NOT	0.886184	0.107	NOT	1.30679	0.483	NOT	0.967637	0.152	NOT
TU0755	1	-	22817923	22819242			AT1G61790.1		727.304	3.25e-18	673.74	1.33e-17	493.577	2.79e-12	822.34	1.9e-19	0.884432	0.177	NOT	999.168	3.35e-28	0.674301	0.0623	NOT	632.54	2.32e-14	0.78031	0.0198	NOT	0.926353	0.368	NOT	0.678639	0.00903	DIFF	1.21503	0.343	NOT	0.769195	0.0939	NOT
TU0756	1	-	22865513	22866444			AT1G61850.1		530.222	2.99e-12	179.911	0.0564624	347.644	1.59e-06	291.779	1.83e-06	1.8172	0.0371	NOT	290.803	0.015606	0.61867	0.155	NOT	208.519	0.00189772	1.66721	0.399	NOT	0.339313	0.000814	DIFF	0.655657	0.0233	DIFF	0.996655	0.307	NOT	0.714647	0.23	NOT
TU0757	1	+	22888362	22888813			AT1G61900.1		877.511	5.29e-12	1011.1	0.000437398	950.13	1.11e-07	658.041	1.59e-05	1.33352	0.137	NOT	684.687	0.000176463	1.47673	0.115	NOT	604.723	0.000152452	1.57118	0.132	NOT	1.15224	0.262	NOT	1.08276	0.466	NOT	1.04049	0.18	NOT	0.918975	0.38	NOT
TU0758	1	+	22939990	22942586			AT1G62050.1		380.157	3.28e-09	299.242	2.41e-07	308.204	2.83e-08	293.641	5.39e-05	1.29463	0.081	NOT	280.396	5.54e-05	1.06721	0.196	NOT	265.345	3.31e-06	1.16152	0.122	NOT	0.787154	0.0827	NOT	0.810728	0.24	NOT	0.954894	0.207	NOT	0.903637	0.319	NOT
TU0759	1	+	22979332	22980448			AT1G62180.1		1208.65	1.35e-20	1635.8	7.43e-19	829.554	1.19e-17	1539.4	3.08e-25	0.785144	0.102	NOT	1747.41	9.71e-26	0.936128	0.459	NOT	885.394	2.22e-17	0.936932	0.373	NOT	1.35341	0.11	NOT	0.686348	0.0501	NOT	1.13512	0.403	NOT	0.575155	0.0111	DIFF
TU0760	1	-	22998219	22998986			AT1G62240.1		3266.65	2.29e-16	2885.78	7.38e-24	2840	3.57e-16	2946.92	7.08e-16	1.1085	0.308	NOT	4313.2	3.26e-14	0.669058	0.456	NOT	2845.02	4.31e-15	0.998236	0.44	NOT	0.883407	0.418	NOT	0.869392	0.459	NOT	1.46363	0.388	NOT	0.965422	0.275	NOT
TU0761	1	+	23035347	23035891					570.916	5.49e-05	209.007	0.0136735	303.388	0.00199141	894.641	7.33e-10	0.638151	0.101	NOT	209.631	3.9e-05	0.997023	0.419	NOT	297.458	0.00148662	1.01994	0.46	NOT	0.366091	0.0131	DIFF	0.531406	0.113	NOT	0.234319	0.000284	DIFF	0.332489	0.00771	DIFF
TU0762	1	-	23038152	23039052					898.214	1.24e-12	1974.32	2.38e-26	2296.77	2.52e-29	1260.11	5.11e-19	0.712806	0.0437	NOT	2209	2.05e-22	0.893762	0.42	NOT	2423.95	6.27e-26	0.947532	0.284	NOT	2.19805	0.000461	DIFF	2.55704	8.97e-05	DIFF	1.75302	0.023	DIFF	1.9236	0.00433	DIFF
TU0763	1	-	23086938	23087799			AT1G62380.1		1172.18	4.74e-16	1464.13	4.15e-18	858.072	1.48e-18	1562.06	1.61e-15	0.750407	0.189	NOT	1639.82	2.31e-19	0.89286	0.331	NOT	1219.66	2.49e-25	0.703534	0.112	NOT	1.24907	0.285	NOT	0.732031	0.174	NOT	1.04978	0.417	NOT	0.780802	0.28	NOT
TU0764	1	+	23088167	23090256			AT1G62390.1		612.472	2.45e-14	899.842	2.12e-20	607.302	9.06e-14	654.367	4.13e-19	0.935976	0.255	NOT	753.455	1.1e-20	1.19429	0.427	NOT	625.513	3.21e-13	0.970886	0.413	NOT	1.4692	0.0653	NOT	0.991559	0.415	NOT	1.15143	0.117	NOT	0.955905	0.272	NOT
TU0765	1	-	23132766	23133303			AT1G62480.1		1698.27	1.85e-10	1034.27	0.000348849	828.608	8.71e-06	2385.3	1.15e-08	0.711973	0.36	NOT	1541.93	9.49e-14	0.670763	0.17	NOT	1403.54	1.72e-10	0.59037	0.0859	NOT	0.609014	0.0425	NOT	0.487913	0.0695	NOT	0.64643	0.368	NOT	0.588412	0.401	NOT
TU0766	1	-	23190488	23192120			AT1G62630.1		522.275	2.81e-11	408.184	9.29e-08	358.095	5.24e-05	574.77	3.48e-08	0.908668	0.377	NOT	449.825	1.42e-10	0.907428	0.433	NOT	348.609	0.000183852	1.02721	0.413	NOT	0.78155	0.171	NOT	0.685645	0.0226	DIFF	0.782617	0.175	NOT	0.606519	0.0326	DIFF
TU0767	1	-	23205578	23206699			AT1G62660.1		557.518	3.01e-08	527.875	6.28e-10	304.67	1.23e-08	785.511	1.17e-09	0.709752	0.172	NOT	658.442	1.64e-10	0.801703	0.113	NOT	474.774	5.78e-07	0.641716	0.236	NOT	0.94683	0.383	NOT	0.546476	0.133	NOT	0.838234	0.494	NOT	0.604414	0.1	NOT
TU0768	1	-	23234626	23236990			AT1G62740.1		429.699	1.79e-09	582.61	1.29e-12	373.835	1.24e-06	438.844	8.29e-08	0.979161	0.374	NOT	721.362	6.1e-10	0.807653	0.435	NOT	505.289	2.24e-11	0.739844	0.0457	NOT	1.35586	0.311	NOT	0.869993	0.15	NOT	1.64378	0.324	NOT	1.15141	0.356	NOT
TU0769	1	+	23237278	23240115			AT1G62750.1		735.052	1.07e-17	685.539	2.07e-18	571.174	2.12e-13	982.842	3.51e-23	0.747884	0.0261	NOT	588.846	4.28e-19	1.16421	0.127	NOT	552.949	9.51e-22	1.03296	0.323	NOT	0.93264	0.447	NOT	0.777053	0.0444	NOT	0.599126	0.000682	DIFF	0.562602	0.000589	DIFF
TU0770	1	+	23264864	23265481			AT1G62810.1		363.758	1.59e-06	284.976	0.000772637	346.559	1.22e-08	413.69	1.49e-11	0.879301	0.232	NOT	283.345	0.000480078	1.00576	0.249	NOT	264.361	0.0318612	1.31093	0.14	NOT	0.783422	0.221	NOT	0.952719	0.382	NOT	0.684921	0.0214	DIFF	0.639032	0.0224	DIFF
TU0771	1	-	23278150	23280751					440.384	6.5e-18	470.717	6.81e-15	364.807	4.24e-11	529.679	5.4e-19	0.831417	0.0731	NOT	344.609	8.75e-12	1.36595	0.0168	NOT	465.248	1.31e-15	0.784113	0.0335	NOT	1.06888	0.484	NOT	0.828384	0.0785	NOT	0.6506	0.000257	DIFF	0.878358	0.161	NOT
TU0772	1	+	23459489	23461003			AT1G63240.1		427.497	4.14e-17	412.891	6.19e-09	544.204	1.39e-15	402.561	2.37e-06	1.06194	0.179	NOT	388.268	1.6e-08	1.06342	0.49	NOT	640.586	4.52e-18	0.849541	0.124	NOT	0.965834	0.33	NOT	1.273	0.226	NOT	0.964495	0.258	NOT	1.59128	0.00382	DIFF
TU0773	1	+	23502737	23505779			AT1G63360.1		339.748	7.58e-06	574.848	6.85e-10	624.763	1.96e-09	639.691	2.64e-08	0.531113	0.151	NOT	482.811	9.8e-20	1.19063	0.327	NOT	508.664	3.26e-09	1.22824	0.3	NOT	1.69198	0.0763	NOT	1.8389	0.0907	NOT	0.754757	0.451	NOT	0.795171	0.451	NOT
TU0774	1	-	23519256	23520577			AT1G63420.1		1314.75	3.69e-15	687.313	1.91e-07	939.792	4.49e-12	1035.19	3.25e-15	1.27006	0.0919	NOT	577.476	5.73e-08	1.1902	0.248	NOT	883.223	1.9e-11	1.06405	0.404	NOT	0.522771	0.00599	DIFF	0.714807	0.0598	NOT	0.557845	0.0272	DIFF	0.853199	0.316	NOT
TU0775	1	-	23571174	23574030			AT1G63540.1,AT1G63550.1		345.095	1.17e-08	260.318	7.26e-07	287.114	1.98e-09	292.133	1.27e-06	1.18129	0.0457	NOT	342.303	1.49e-11	0.76049	0.0206	NOT	317.44	1.19e-12	0.904467	0.192	NOT	0.754337	0.00721	DIFF	0.831985	0.0247	DIFF	1.17174	0.0834	NOT	1.08663	0.279	NOT
TU0776	1	+	23620906	23621346	AT1G63680	AT1G63680			2383.78	3.93e-11	2232.99	1.82e-12	2887.28	7.55e-12	2152.1	3.98e-11	1.10765	0.396	NOT	1498.07	1.14e-13	1.49058	0.134	NOT	3226.24	2.2e-14	0.894937	0.193	NOT	0.936743	0.425	NOT	1.21122	0.445	NOT	0.696097	0.196	NOT	1.49911	0.131	NOT
TU0777	1	-	23658542	23660838			AT1G63750.1	TU0778	330.367	1.02e-05	462.426	2.32e-13	306.68	1.54e-05	310.915	1.37e-05	1.06256	0.499	NOT	285.13	2.62e-05	1.62181	0.0697	NOT	353.575	2.33e-07	0.867369	0.213	NOT	1.39973	0.0858	NOT	0.928301	0.326	NOT	0.917067	0.452	NOT	1.13721	0.393	NOT
TU0778	1	+	23659278	23660941				TU0777	772.111	4.17e-09	670.33	2.64e-11	877.169	7.4e-11	609.015	5.79e-08	1.2678	0.168	NOT	711.9	5.95e-11	0.941607	0.409	NOT	1725.93	5.37e-18	0.50823	0.00901	NOT	0.868178	0.232	NOT	1.13607	0.246	NOT	1.16894	0.0254	DIFF	2.83397	2.12e-05	DIFF
TU0779	1	+	23686161	23686551			AT1G63820.1		837.884	0.0415468	1195.47	8.56e-09	903.189	0.0136703	700.769	0.0136727	1.19566	0.234	NOT	1292.89	0.00869723	0.924649	0.317	NOT	1247.59	0.000128388	0.723947	0.26	NOT	1.42677	0.159	NOT	1.07794	0.4	NOT	1.84496	0.5	NOT	1.78032	0.317	NOT
TU0780	1	-	23731445	23732726			AT1G63930.1		605.941	2.3e-12	453.522	3.76e-10	456.191	1.99e-09	304.224	2.86e-10	1.99176	0.0483	NOT	1355.36	1.78e-26	0.334614	0.00053	DIFF	882.958	1.15e-13	0.516662	0.0626	NOT	0.748459	0.262	NOT	0.752864	0.158	NOT	4.45514	2.38e-05	DIFF	2.90233	0.0228	DIFF
TU0781	1	-	23745826	23746221			AT1G63980.1		4157.34	2.75e-10	5436.36	2.32e-13	6685.14	1.03e-09	6350.97	1.04e-12	0.654599	0.126	NOT	5089.68	1.64e-11	1.06811	0.44	NOT	5837.08	2.62e-12	1.14529	0.357	NOT	1.30765	0.16	NOT	1.60803	0.294	NOT	0.801402	0.41	NOT	0.919085	0.45	NOT
TU0782	1	+	23807398	23809854			AT1G64140.1,AT1G64142.1		517.802	2.88e-10	521.09	5.94e-11	408.095	5.95e-10	496	1.58e-10	1.04396	0.365	NOT	530.326	3.89e-12	0.982584	0.373	NOT	505.284	1.38e-10	0.807655	0.153	NOT	1.00635	0.274	NOT	0.788129	0.165	NOT	1.06921	0.266	NOT	1.01872	0.351	NOT
TU0783	1	-	23876113	23877610			AT1G64330.1		1251.99	3.17e-15	724.141	3.84e-06	880.219	2.27e-07	818.722	3.76e-08	1.5292	0.0858	NOT	874.4	2.22e-08	0.828158	0.272	NOT	880.202	2.36e-06	1.00002	0.346	NOT	0.578392	0.044	NOT	0.703056	0.261	NOT	1.06801	0.372	NOT	1.07509	0.333	NOT
TU0784	1	-	23890465	23893498			AT1G64360.1,AT1G64370.1		2636.28	7.43e-28	2192.75	2.06e-23	1743.35	1.1e-20	4306.52	5.35e-34	0.61216	0.0164	NOT	3617.2	7.52e-35	0.606201	0.105	NOT	1865.65	1.48e-27	0.934446	0.0703	NOT	0.831759	0.308	NOT	0.661292	0.0328	DIFF	0.839936	0.0701	NOT	0.433215	0.0033	DIFF
TU0785	1	-	23905275	23906632			AT1G64385.1		546.672	5.84e-06	518.434	2.41e-05	458.316	1.52e-06	665.128	1.47e-06	0.821905	0.284	NOT	847.758	2.12e-11	0.611535	0.343	NOT	448.59	2.51e-08	1.02168	0.497	NOT	0.948346	0.395	NOT	0.838375	0.459	NOT	1.27458	0.386	NOT	0.674442	0.315	NOT
TU0786	1	+	23947402	23948585			AT1G64460.1,AT1G64470.1		334.55	4.64e-07	263.869	0.000969604	349.467	5e-08	362.284	8.27e-12	0.923447	0.359	NOT	329.201	3.73e-07	0.801544	0.288	NOT	252.083	1.88e-05	1.38632	0.302	NOT	0.788728	0.178	NOT	1.04459	0.316	NOT	0.908682	0.471	NOT	0.695816	0.262	NOT
TU0787	1	-	23955831	23958023			AT1G64500.1		865.952	1.38e-13	745.793	3.23e-12	570.727	2.92e-07	989.407	1.68e-13	0.875223	0.488	NOT	575.213	3.6e-09	1.29655	0.128	NOT	593.449	1.46e-07	0.961712	0.499	NOT	0.861241	0.381	NOT	0.659075	0.131	NOT	0.581371	0.0932	NOT	0.599803	0.131	NOT
TU0788	1	-	24021474	24025764			AT1G64625.1,AT1G64628.1,AT1G64630.1		219.387	4.04e-05	267.614	1.59e-11	270.452	6.13e-09	370.808	4.76e-11	0.591646	0.00577	NOT	269.71	3.16e-06	0.992229	0.457	NOT	259.684	5.21e-11	1.04147	0.184	NOT	1.21983	0.11	NOT	1.23276	0.11	NOT	0.727358	0.114	NOT	0.700319	0.0144	DIFF
TU0789	1	-	24039520	24040775			AT1G64680.1		938.343	9.42e-12	888.752	1.59e-11	1073.43	2.82e-14	770.605	7.57e-15	1.21767	0.332	NOT	959.634	7.21e-12	0.926136	0.303	NOT	1081.89	2.45e-10	0.99218	0.165	NOT	0.94715	0.344	NOT	1.14396	0.2	NOT	1.2453	0.398	NOT	1.40395	0.308	NOT
TU0790	1	-	24048243	24049974			AT1G64710.1		297.692	2.28e-07	408.089	4.26e-11	238.918	6.16e-07	338.027	2.13e-09	0.880675	0.217	NOT	580.175	3.27e-11	0.703389	0.0402	NOT	418.542	1.37e-07	0.570834	0.019	NOT	1.37084	0.107	NOT	0.802568	0.222	NOT	1.71636	0.0172	DIFF	1.23819	0.294	NOT
TU0791	1	-	24060421	24062099			AT1G64770.1		523.453	7.45e-13	423.88	1.69e-08	505.363	9.17e-14	522.164	7.3e-08	1.00247	0.297	NOT	449.467	3.6e-08	0.943073	0.468	NOT	414.869	1.23e-08	1.21813	0.0408	NOT	0.809777	0.133	NOT	0.965441	0.487	NOT	0.860777	0.211	NOT	0.794519	0.146	NOT
TU0792	1	+	24064431	24066406			AT1G64780.1		360.285	6.81e-11	403.76	5.12e-19	419.022	2.55e-08	331.93	5.57e-11	1.08542	0.493	NOT	402.234	1.22e-10	1.00379	0.42	NOT	351.424	2.87e-09	1.19235	0.344	NOT	1.12067	0.168	NOT	1.16303	0.266	NOT	1.2118	0.242	NOT	1.05873	0.396	NOT
TU0793	1	+	24085485	24086570			AT1G64790.1		206.622	0.261685	218.464	3.91e-05	153.377	0.259482	783.33	1.66e-09	0.263774	6.88e-06	DIFF	599.741	9.91e-13	0.364264	0.000189	DIFF	871.199	4.62e-17	0.176053	4.64e-09	DIFF	1.05731	0.155	NOT	0.742307	0.203	NOT	0.76563	0.422	NOT	1.11217	0.13	NOT
TU0794	1	-	24116878	24118628			AT1G64900.1		524.927	2.19e-15	599.575	1.62e-19	470.461	1.48e-18	591.472	9.73e-15	0.887493	0.354	NOT	494.032	2.17e-15	1.21364	0.179	NOT	636.51	3.28e-18	0.739126	0.369	NOT	1.14221	0.122	NOT	0.896241	0.476	NOT	0.835258	0.295	NOT	1.07615	0.219	NOT
TU0795	1	+	24137929	24139654			AT1G64970.1		463.663	5.76e-11	542.969	1.42e-19	330.758	3.37e-06	427.116	2.52e-11	1.08557	0.314	NOT	305.241	3.06e-09	1.77882	0.0835	NOT	289.458	1.48e-09	1.14268	0.451	NOT	1.17104	0.397	NOT	0.713359	0.101	NOT	0.714656	0.265	NOT	0.677703	0.192	NOT
TU0796	1	-	24153576	24157821			AT1G65010.1		672.351	1.39e-15	497.252	1.98e-09	559.401	5.6e-14	677.186	7.15e-17	0.99286	0.142	NOT	385.046	4.77e-06	1.29141	0.171	NOT	364.648	2.52e-07	1.53408	0.0119	NOT	0.739572	0.0858	NOT	0.832007	0.165	NOT	0.568597	7.81e-05	DIFF	0.538475	6.99e-06	DIFF
TU0797	1	+	24163166	24164408			AT1G65032.1,AT1G65040.1		179.278	0.28173	340.899	6.49e-06	332.424	1.79e-06	304.495	7.91e-08	0.588772	0.0254	NOT	493.084	1.21e-10	0.691361	0.0411	NOT	359.397	5.76e-06	0.924949	0.239	NOT	1.90151	0.0107	DIFF	1.85424	0.0247	DIFF	1.61935	0.0059	DIFF	1.18031	0.151	NOT
TU0798	1	+	24176729	24177726			AT1G65070.1		268.937	9.29e-05	494.591	6.61e-09	318.444	1.14e-07	308.805	6.88e-12	0.870896	0.267	NOT	321.912	7.53e-06	1.53642	0.0165	NOT	381.779	1.84e-07	0.834106	0.291	NOT	1.83906	0.00793	DIFF	1.18408	0.368	NOT	1.04244	0.371	NOT	1.23631	0.33	NOT
TU0799	1	-	24231741	24232310			AT1G65220.1		830.463	4.63e-13	820.469	5.61e-10	437.063	0.00010325	1017.26	1.07e-15	0.816372	0.31	NOT	622.545	3.35e-12	1.31793	0.386	NOT	399.875	1.11e-08	1.093	0.454	NOT	0.987966	0.24	NOT	0.526288	0.00961	DIFF	0.611982	0.0436	DIFF	0.39309	0.0023	DIFF
TU0800	1	-	24240686	24241170			AT1G65260.1		739.177	2.66e-09	515.182	1.01e-06	374.246	0.00202298	749.143	1.95e-05	0.986697	0.373	NOT	532.052	8.47e-08	0.968293	0.309	NOT	374.702	7.86e-06	0.998783	0.411	NOT	0.696967	0.0886	NOT	0.506301	0.0271	DIFF	0.710214	0.29	NOT	0.500174	0.0908	NOT
TU0801	1	+	24263746	24264652			AT1G65320.1		574.43	2.59e-10	551.334	5.68e-10	406.218	8.71e-06	779.829	1.61e-06	0.73661	0.382	NOT	482.442	7.12e-08	1.1428	0.493	NOT	366.211	1.84e-07	1.10925	0.216	NOT	0.959793	0.357	NOT	0.707167	0.266	NOT	0.618651	0.413	NOT	0.469604	0.186	NOT
TU0802	1	+	24418802	24419587			AT1G65650.1		466.992	1.31e-07	254.562	0.00777639	448.354	2.03e-11	567.694	1.12e-07	0.822612	0.26	NOT	405.915	2.66e-08	0.627131	0.0457	NOT	318.844	5.81e-05	1.40619	0.099	NOT	0.54511	0.0654	NOT	0.960089	0.432	NOT	0.715024	0.277	NOT	0.561648	0.029	DIFF
TU0803	1	+	24422805	24423890			AT1G65660.1		783.222	4.97e-06	1254.07	2.59e-09	1138.19	2.25e-06	1372.03	3.14e-15	0.570849	0.181	NOT	963.33	5.95e-13	1.30181	0.381	NOT	1180.3	8.51e-08	0.964323	0.263	NOT	1.60117	0.22	NOT	1.45322	0.335	NOT	0.70212	0.342	NOT	0.860258	0.476	NOT
TU0804	1	+	24443855	24445373			AT1G65720.1		693.277	1.53e-12	899.477	5.62e-13	917.626	3.48e-08	1156.11	2.52e-11	0.599664	0.477	NOT	1274.76	4.55e-16	0.705605	0.162	NOT	1457.15	5.82e-32	0.62974	0.0138	NOT	1.29743	0.477	NOT	1.32361	0.276	NOT	1.10263	0.231	NOT	1.26039	0.054	DIFF
TU0805	1	+	24464509	24465996			AT1G65770.1		215.168	0.000788572	291.728	1.6e-07	269.18	0.000262021	287.581	3.78e-05	0.7482	0.124	NOT	404.33	6.86e-09	0.72151	0.139	NOT	341.502	6.39e-06	0.788224	0.237	NOT	1.35581	0.126	NOT	1.25102	0.45	NOT	1.40597	0.146	NOT	1.1875	0.44	NOT
TU0806	1	-	24545024	24545659			AT1G65930.1		522.96	2.45e-08	371.993	9.62e-06	338.121	0.000328969	768.548	5.6e-12	0.680452	0.225	NOT	424.981	0.000138222	0.875317	0.391	NOT	369.391	2.01e-07	0.915347	0.353	NOT	0.711322	0.265	NOT	0.646552	0.0784	NOT	0.552966	0.134	NOT	0.480635	0.0289	DIFF
TU0807	1	-	24559545	24560957			AT1G65960.1		636.982	5.7e-10	439.373	3.73e-10	312.334	7.34e-08	1044.86	3.07e-15	0.609634	0.0469	NOT	436.681	4.93e-07	1.00616	0.26	NOT	407.469	5.95e-09	0.766522	0.431	NOT	0.689773	0.0142	DIFF	0.490334	0.00268	DIFF	0.417933	0.000632	DIFF	0.389975	2.15e-05	DIFF
TU0808	1	+	24609357	24610810			AT1G66100.1		841.615	2.46e-06	829.925	7.02e-05	758.442	1.9e-05	895.811	1.02e-07	0.939501	0.445	NOT	1313.68	8.69e-08	0.631756	0.0482	NOT	1263.32	3.08e-10	0.600356	0.0118	NOT	0.98611	0.298	NOT	0.901175	0.114	NOT	1.46647	0.165	NOT	1.41025	0.175	NOT
TU0809	1	-	24636606	24638156			AT1G66150.1		584.247	7.18e-21	431.204	4.41e-10	334.206	1.98e-10	512.726	4.09e-18	1.13949	0.455	NOT	389.277	2.38e-09	1.1077	0.123	NOT	318.371	4.21e-06	1.04974	0.289	NOT	0.738051	0.0648	NOT	0.572029	0.0128	DIFF	0.75923	0.00582	DIFF	0.620938	0.00356	DIFF
TU0810	1	-	24650844	24652498			AT1G66180.1		392.236	8.64e-15	514.562	5.74e-15	374.375	5.98e-08	482.101	2.51e-11	0.813597	0.447	NOT	476.084	1.49e-11	1.08082	0.204	NOT	412.547	8.67e-11	0.907472	0.415	NOT	1.31187	0.182	NOT	0.954464	0.19	NOT	0.987519	0.445	NOT	0.855727	0.244	NOT
TU0811	1	+	24658920	24660014			AT1G66200.1		1783.82	3.41e-13	1505.03	7.99e-08	1054.45	4.28e-08	2214.64	2.92e-10	0.805467	0.412	NOT	1640.33	3.94e-10	0.917517	0.34	NOT	801.426	4.49e-08	1.31572	0.421	NOT	0.843712	0.283	NOT	0.591119	0.081	NOT	0.740676	0.345	NOT	0.361876	0.054	DIFF
TU0812	1	-	24679623	24681846			AT1G66230.1		387.466	1.79e-09	337.846	7.65e-05	335.64	0.000362036	348.152	0.000150685	1.11292	0.333	NOT	330.189	2.28e-07	1.02319	0.374	NOT	365.216	0.000283383	0.919018	0.344	NOT	0.871937	0.103	NOT	0.866244	0.0789	NOT	0.948405	0.258	NOT	1.04901	0.281	NOT
TU0813	1	+	24689924	24690308			AT1G66240.1		1786.63	2.69e-09	1867.43	5.15e-05	1720.65	4.57e-07	1789.53	2.93e-08	0.998379	0.404	NOT	2265.96	3.05e-07	0.824123	0.207	NOT	2535.7	1.06e-09	0.67857	0.118	NOT	1.04522	0.307	NOT	0.96307	0.287	NOT	1.26623	0.382	NOT	1.41696	0.237	NOT
TU0814	1	+	24777993	24778464			AT1G66410.1		950.27	1.46e-08	851.368	1.23e-05	643.982	7.81e-08	1114.04	1.8e-08	0.852995	0.173	NOT	985.166	2.16e-19	0.864187	0.0429	NOT	1125.24	1.71e-08	0.572306	0.242	NOT	0.895922	0.163	NOT	0.677683	0.216	NOT	0.884318	0.378	NOT	1.01005	0.159	NOT
TU0815	1	+	24815084	24816483			AT1G66500.1		276.764	6.68e-05	311.641	3.95e-06	156.634	0.014203	214.769	0.000311531	1.28866	0.445	NOT	522.383	9.93e-10	0.596576	0.12	NOT	264.15	1.87e-08	0.592974	0.0591	NOT	1.12602	0.0626	NOT	0.565948	0.119	NOT	2.4323	0.00663	DIFF	1.22993	0.368	NOT
TU0816	1	-	24843222	24844298			AT1G66580.1		1268.92	4.48e-19	1066.38	9.88e-11	806.087	2e-11	1256.3	6.34e-11	1.01005	0.278	NOT	1406.85	2.37e-14	0.757991	0.103	NOT	1014.97	7.85e-13	0.794198	0.154	NOT	0.840384	0.139	NOT	0.635254	0.0836	NOT	1.11984	0.203	NOT	0.807904	0.387	NOT
TU0817	1	+	24895901	24895998					7900.66	1.75e-19	4875.06	1.13e-13	4630.03	9.36e-11	7121.14	1.84e-11	1.10947	0.322	NOT	3922.07	2.29e-13	1.24298	0.217	NOT	4581.71	3.54e-13	1.01055	0.477	NOT	0.617045	0.193	NOT	0.586031	0.113	NOT	0.550764	0.118	NOT	0.643396	0.163	NOT
TU0818	1	+	24937684	24939293			AT1G66840.1		610.325	8.55e-10	531.42	7.68e-14	426.966	3.14e-06	579.354	3.81e-14	1.05346	0.467	NOT	489.608	1.14e-10	1.0854	0.126	NOT	310.237	0.000649522	1.37626	0.498	NOT	0.870716	0.426	NOT	0.699572	0.0575	NOT	0.845093	0.147	NOT	0.535488	0.0447	DIFF
TU0819	1	-	24976191	24976622			AT1G66930.1		817.734	6.86e-15	2186.4	5.51e-27	1330.6	4.9e-19	1132.23	7.37e-16	0.722233	0.0633	NOT	2298.45	3.84e-26	0.95125	0.217	NOT	1625.63	1.59e-18	0.818513	0.187	NOT	2.67373	0.00096	DIFF	1.62718	0.0401	NOT	2.03002	0.00163	DIFF	1.43578	0.179	NOT
TU0820	1	+	24996439	24997293			AT1G66970.1		756.692	1.7e-13	303.897	0.00133565	386.398	1.59e-06	484.94	2e-08	1.56038	0.0496	NOT	249.669	0.00226267	1.2172	0.182	NOT	188.292	0.000787969	2.05212	0.0222	NOT	0.401613	0.000676	DIFF	0.510641	0.00153	DIFF	0.514845	0.00706	DIFF	0.388279	0.000704	DIFF
TU0821	1	+	25007931	25008455			AT1G67000.1		408.509	2.22e-07	370.323	0.0563524	485.213	6.56e-06	362.487	0.000386849	1.12696	0.225	NOT	602.447	2.91e-11	0.614698	0.0787	NOT	466.649	2.22e-07	1.03978	0.459	NOT	0.906523	0.418	NOT	1.18777	0.454	NOT	1.66198	0.0225	DIFF	1.28735	0.211	NOT
TU0822	1	+	25032706	25033342			AT1G67050.1		288.765	0.00136861	261.068	0.000748371	544.22	1.25e-13	494.575	0.000105374	0.583865	0.173	NOT	304.98	0.000169393	0.856017	0.308	NOT	231.505	0.0159805	2.35079	0.0524	NOT	0.904085	0.424	NOT	1.88465	0.0754	NOT	0.616651	0.295	NOT	0.468089	0.156	NOT
TU0823	1	+	25051776	25053287			AT1G67090.1		1868.63	1.16e-07	1844.6	4.07e-10	1183.4	1.69e-10	1685.7	2.53e-07	1.10852	0.422	NOT	1874.73	2.95e-09	0.983928	0.425	NOT	1830.12	1.87e-11	0.646624	0.0728	NOT	0.98714	0.415	NOT	0.633298	0.391	NOT	1.11214	0.342	NOT	1.08567	0.0906	NOT
TU0824	1	+	25068049	25068522			AT1G67110.1		521.745	1.3e-10	695.699	2.03e-10	751.44	4.54e-07	559.059	3.09e-05	0.933256	0.158	NOT	404.327	5.02e-06	1.72063	0.0459	NOT	539.498	0.000408023	1.39285	0.168	NOT	1.33341	0.486	NOT	1.44024	0.403	NOT	0.723228	0.266	NOT	0.965011	0.38	NOT
TU0825	1	+	25074075	25076363			AT1G67120.1		638.853	7.29e-12	589.034	4.9e-11	652.275	2.76e-13	603.867	7.15e-12	1.05794	0.478	NOT	463.969	7.41e-11	1.26955	0.344	NOT	563.983	1.92e-11	1.15655	0.444	NOT	0.922018	0.405	NOT	1.02101	0.49	NOT	0.76833	0.235	NOT	0.933952	0.396	NOT
TU0826	1	+	25104694	25105335			AT1G67140.1		610.158	6.16e-06	400.35	0.000356473	533.16	1.96e-09	790.239	3.13e-10	0.772118	0.252	NOT	611.685	3.06e-09	0.654504	0.13	NOT	514.638	0.000153831	1.03599	0.451	NOT	0.656142	0.287	NOT	0.873806	0.372	NOT	0.774051	0.474	NOT	0.651243	0.362	NOT
TU0827	1	+	25155203	25158472			AT1G67230.1		335.414	1.52e-12	433.03	2.33e-10	334.384	1.28e-07	354.281	2.74e-11	0.946746	0.445	NOT	402.879	1.74e-10	1.07484	0.483	NOT	322.552	1.5e-07	1.03668	0.473	NOT	1.29103	0.25	NOT	0.996929	0.489	NOT	1.13717	0.336	NOT	0.910441	0.431	NOT
TU0828	1	-	25234631	25235349			AT1G67340.1		768.3	1.33e-08	1154.94	1.49e-10	471.411	1.52e-06	891.156	6.08e-07	0.862139	0.301	NOT	674.549	7.33e-07	1.71217	0.279	NOT	548.06	2.06e-07	0.860145	0.421	NOT	1.50324	0.303	NOT	0.613577	0.153	NOT	0.756937	0.301	NOT	0.614999	0.421	NOT
TU0829	1	+	25240594	25241555			AT1G67360.1		316.298	2.99e-07	1012.93	3.93e-24	483.285	5.95e-10	332.586	5.14e-11	0.951026	0.108	NOT	1426.71	9.26e-27	0.709976	0.076	NOT	565.009	6.62e-16	0.855358	0.195	NOT	3.20245	3.94e-05	DIFF	1.52794	0.125	NOT	4.28975	3.26e-06	DIFF	1.69884	0.2	NOT
TU0830	1	-	25266948	25267411			AT1G67430.1		1105.04	3.92e-11	852.782	1.64e-14	1023.97	1.51e-13	1126.86	6.25e-12	0.980636	0.413	NOT	892.315	9.69e-14	0.955696	0.471	NOT	1012.7	8.26e-15	1.01113	0.42	NOT	0.77172	0.493	NOT	0.926636	0.34	NOT	0.79186	0.462	NOT	0.898692	0.444	NOT
TU0831	1	-	25281119	25282141			AT1G67480.1		561.262	1.56e-07	398.442	9.25e-09	344.462	2.44e-07	642.033	7.16e-10	0.874195	0.251	NOT	449.576	1.32e-09	0.886262	0.158	NOT	369.122	4.37e-07	0.933193	0.332	NOT	0.709904	0.115	NOT	0.613728	0.339	NOT	0.700238	0.18	NOT	0.574927	0.0472	DIFF
TU0832	1	+	25333136	25335018			AT1G67580.1		362.482	4.1e-14	287.472	1.14e-08	273.972	1.59e-06	307.35	5.93e-09	1.17938	0.291	NOT	317.702	3.18e-05	0.904848	0.425	NOT	246.122	1.11e-08	1.11316	0.26	NOT	0.793066	0.0844	NOT	0.755822	0.122	NOT	1.03368	0.25	NOT	0.800787	0.0717	NOT
TU0833	1	+	25336830	25337314			AT1G67590.1		482.558	1.33e-06	593.9	8.56e-09	521.416	1.55e-06	392.035	1.24e-07	1.23091	0.442	NOT	298.522	0.000328924	1.98947	0.0481	NOT	271.797	0.00621872	1.9184	0.144	NOT	1.23073	0.199	NOT	1.08053	0.253	NOT	0.761468	0.138	NOT	0.693298	0.178	NOT
TU0834	1	-	25368086	25368632			AT1G67660.1		1399.02	1.47e-06	1303.57	4.59e-07	1412.98	6.65e-09	1370.84	2.24e-08	1.02056	0.229	NOT	1488.94	3.02e-15	0.875502	0.153	NOT	1125.65	0.000875059	1.25526	0.193	NOT	0.931774	0.366	NOT	1.00998	0.386	NOT	1.08615	0.402	NOT	0.821139	0.108	NOT
TU0835	1	+	25369498	25370599			AT1G67680.1		1095.26	4.65e-17	891.279	8.47e-11	893.166	4.09e-10	1326.63	1.05e-07	0.825596	0.163	NOT	773.55	1.27e-12	1.15219	0.482	NOT	675.026	1.66e-09	1.32316	0.243	NOT	0.81376	0.139	NOT	0.815483	0.172	NOT	0.583094	0.474	NOT	0.508828	0.259	NOT
TU0836	1	-	25378847	25379555			AT1G67700.1		1539.48	1.69e-08	882.619	7.58e-11	696.683	6.45e-05	1629.16	1.11e-09	0.944953	0.333	NOT	884.698	6.45e-07	0.99765	0.276	NOT	790.574	1.82e-10	0.881237	0.117	NOT	0.573323	0.297	NOT	0.452544	0.0378	NOT	0.543039	0.0891	NOT	0.485265	0.0826	NOT
TU0837	1	+	25397737	25398841			AT1G67740.1		1570.7	1.11e-24	1717.55	5.25e-34	1752.35	3.94e-21	1598.77	1.53e-20	0.982443	0.396	NOT	1836.85	8.35e-26	0.935052	0.498	NOT	1116.37	5.51e-23	1.56969	0.271	NOT	1.09349	0.412	NOT	1.11565	0.304	NOT	1.14891	0.463	NOT	0.698268	0.0759	NOT
TU0838	1	+	25452875	25455267			AT1G67870.1		865.365	5.81e-28	580.014	1.71e-21	574.033	4.58e-20	692.155	5.83e-17	1.25025	0.0504	NOT	617.963	1.05e-18	0.93859	0.486	NOT	417.398	2.44e-11	1.37527	0.292	NOT	0.670254	0.0166	DIFF	0.663342	0.014	DIFF	0.89281	0.335	NOT	0.603041	0.126	NOT
TU0839	1	+	25488432	25489003			AT1G67970.1		530.799	3.71e-06	567.212	1.67e-06	455.374	4.54e-07	469.43	5.99e-07	1.13073	0.461	NOT	607.154	3.05e-11	0.934214	0.406	NOT	280.395	1.54e-08	1.62404	0.313	NOT	1.0686	0.429	NOT	0.857903	0.399	NOT	1.29339	0.475	NOT	0.59731	0.0948	NOT
TU0840	1	-	25497067	25497390			AT1G68010.1		2176.21	2.63e-10	2064.69	1.83e-09	1536.22	0.00076685	2909.42	5.14e-13	0.747988	0.276	NOT	2182.94	1.86e-06	0.94583	0.349	NOT	1531.62	0.000365103	1.003	0.387	NOT	0.948755	0.338	NOT	0.705915	0.103	NOT	0.750301	0.276	NOT	0.526435	0.0718	NOT
TU0841	1	-	25528319	25529678			AT1G68110.1		612.594	7.45e-13	419.783	4.33e-10	436.404	6.01e-10	497.361	2.64e-12	1.23169	0.314	NOT	321.115	0.00013718	1.30727	0.0341	NOT	352.61	3.21e-07	1.23764	0.132	NOT	0.685255	0.0818	NOT	0.712387	0.131	NOT	0.645638	0.00667	DIFF	0.708962	0.029	DIFF
TU0842	1	+	25542648	25544083			AT1G68140.1		404.308	9.27e-15	705.484	1.95e-16	342.412	4.73e-08	452.024	9.75e-11	0.894439	0.216	NOT	980.643	2.65e-15	0.71941	0.241	NOT	413.106	1.32e-07	0.828872	0.35	NOT	1.74492	0.00841	DIFF	0.846909	0.304	NOT	2.16945	0.0207	DIFF	0.913903	0.202	NOT
TU0843	1	-	25661311	25663898			AT1G68440.1		677.877	1.37e-09	702.163	2.06e-10	434.935	4.92e-11	761.209	5.14e-10	0.890527	0.458	NOT	1009.87	5.31e-13	0.6953	0.377	NOT	548.643	6.2e-08	0.792747	0.317	NOT	1.03583	0.37	NOT	0.641613	0.135	NOT	1.32667	0.432	NOT	0.720752	0.193	NOT
TU0844	1	+	25712817	25714519			AT1G68520.1		1184.06	3.34e-12	803.045	7.54e-10	707.488	1.28e-08	1210.64	5.95e-13	0.978045	0.186	NOT	838.51	9.56e-14	0.957705	0.253	NOT	461.07	6.33e-10	1.53445	0.166	NOT	0.678213	0.186	NOT	0.59751	0.107	NOT	0.692617	0.13	NOT	0.380848	0.0012	DIFF
TU0845	1	+	25738212	25739960			AT1G68560.1		368.031	3.6e-08	340.243	2.43e-09	361.835	8.78e-08	787.547	3.07e-18	0.467313	0.000231	DIFF	280.422	1.32e-07	1.21332	0.083	NOT	293.007	1.71e-08	1.2349	0.23	NOT	0.924495	0.45	NOT	0.983164	0.461	NOT	0.35607	9.91e-07	DIFF	0.37205	5.6e-06	DIFF
TU0846	1	-	25758791	25759527					367.887	1.11e-07	529.687	4.26e-11	383.307	1.29e-05	440.109	1.83e-09	0.8359	0.188	NOT	527.148	8.2e-12	1.00482	0.389	NOT	356.481	9.6e-06	1.07525	0.395	NOT	1.43981	0.183	NOT	1.04192	0.371	NOT	1.19777	0.369	NOT	0.809983	0.0526	DIFF
TU0847	1	+	25761291	25761853			AT1G68590.1		1866.8	9.33e-21	1205.82	1.7e-16	1101.13	8.64e-16	1456.38	2.6e-20	1.28181	0.471	NOT	1016.88	6.77e-18	1.1858	0.339	NOT	925.755	2.65e-17	1.18944	0.453	NOT	0.645929	0.126	NOT	0.589849	0.0605	NOT	0.698224	0.0468	DIFF	0.635655	0.0464	DIFF
TU0848	1	+	25781769	25781989			AT1G68660.1		1404.05	1.38e-14	1000.55	4.28e-12	726.228	2.16e-09	2085.46	2.74e-11	0.673257	0.418	NOT	1653.46	1.69e-19	0.605125	0.12	NOT	820.34	6.79e-17	0.885277	0.424	NOT	0.712617	0.147	NOT	0.517238	0.0566	NOT	0.792851	0.487	NOT	0.393362	0.0803	NOT
TU0849	1	+	25792241	25796430	AT1G68690	AT1G68690			1876.09	3.95e-20	2030.87	2.01e-21	3094.43	1.31e-21	1851.27	3.78e-18	1.01341	0.497	NOT	1164.05	5.58e-20	1.74466	0.275	NOT	2344.41	1.63e-19	1.31992	0.376	NOT	1.0825	0.489	NOT	1.6494	0.406	NOT	0.628785	0.284	NOT	1.26638	0.487	NOT
TU0850	1	+	25835475	25836630			AT1G68780.1		372.905	2.37e-15	299.692	1.49e-09	275.296	8.2e-12	503.865	1.35e-14	0.740089	0.0927	NOT	254.632	0.0124026	1.17696	0.139	NOT	243.434	0.000220797	1.13089	0.401	NOT	0.803668	0.284	NOT	0.738247	0.106	NOT	0.505358	0.00256	DIFF	0.483133	0.00398	DIFF
TU0851	1	+	25838640	25841018			AT1G68790.1		479.846	2.74e-13	512.492	8.2e-10	647.473	1.27e-13	459.936	1.78e-08	1.04329	0.257	NOT	485.65	1.09e-11	1.05527	0.404	NOT	423.551	1.16e-06	1.52868	0.046	NOT	1.06803	0.264	NOT	1.34933	0.47	NOT	1.05591	0.428	NOT	0.920891	0.111	NOT
TU0852	1	+	25850888	25851818			AT1G68800.1		347.249	0.001751	286.884	1.07e-05	427.583	1.02e-10	477.519	6.71e-07	0.727194	0.0891	NOT	229.088	0.000248591	1.25229	0.26	NOT	213.7	0.00431396	2.00086	0.0064	NOT	0.826162	0.499	NOT	1.23134	0.0708	NOT	0.479746	0.0225	DIFF	0.447521	0.0226	DIFF
TU0853	1	+	25875937	25877038			AT1G68830.1		417.385	1.71e-09	365.026	1.39e-07	243.212	0.00599755	551.349	2.19e-12	0.757025	0.139	NOT	529.27	5.22e-10	0.689678	0.258	NOT	228.538	0.000444555	1.06421	0.188	NOT	0.874555	0.403	NOT	0.582704	0.0586	NOT	0.959955	0.33	NOT	0.414507	0.0011	DIFF
TU0854	1	-	25883906	25886327			AT1G68840.1		653.969	6.31e-14	422.387	1.49e-11	295.603	0.000106702	878.297	7.6e-19	0.744588	0.0726	NOT	458.533	2.27e-11	0.92117	0.284	NOT	325.571	7.03e-06	0.907952	0.417	NOT	0.645882	0.0577	NOT	0.452014	0.00549	DIFF	0.522071	0.00679	DIFF	0.370684	3.38e-05	DIFF
TU0855	1	-	25892782	25893239			AT1G68870.1		1420.97	2.02e-13	1540.75	2.38e-11	1331.99	5.73e-10	1237.1	7.91e-12	1.14863	0.416	NOT	1991.61	1.57e-10	0.77362	0.297	NOT	1728.87	1.94e-09	0.77044	0.431	NOT	1.08429	0.391	NOT	0.937381	0.441	NOT	1.6099	0.222	NOT	1.39752	0.396	NOT
TU0856	1	+	25926834	25930258			AT1G68940.1		671.261	2.47e-15	428.965	1.22e-11	527.236	4.26e-16	433.008	2.52e-11	1.55023	0.00597	NOT	249.996	4.96e-06	1.71589	8.67e-05	DIFF	413.309	9.9e-15	1.27565	0.0788	NOT	0.639044	0.0546	NOT	0.785441	0.147	NOT	0.577347	0.00594	DIFF	0.954507	0.468	NOT
TU0857	1	-	25930610	25932245			AT1G68945.1,AT1G68950.1		1820.56	4.45e-07	1699.98	1.8e-05	1521.27	2.14e-07	1986.95	8.87e-05	0.916259	0.337	NOT	1843.89	1.6e-05	0.921953	0.332	NOT	1500.96	7.32e-09	1.01353	0.295	NOT	0.933768	0.377	NOT	0.835606	0.468	NOT	0.928	0.339	NOT	0.755409	0.5	NOT
TU0858	1	-	25962452	25963870			AT1G69040.1		388.287	1.23e-14	303.801	1.04e-06	318.478	1.05e-06	390.201	7.49e-10	0.995095	0.473	NOT	303.074	4.02e-05	1.0024	0.489	NOT	300.114	7.62e-06	1.06119	0.362	NOT	0.782414	0.156	NOT	0.820213	0.277	NOT	0.776713	0.148	NOT	0.769127	0.242	NOT
TU0859	1	-	26002937	26005016			AT1G69160.1		614.275	5.3e-14	866.005	4.84e-17	493.902	5.73e-10	610.793	1.02e-11	1.0057	0.455	NOT	1100.73	5.42e-19	0.786755	0.314	NOT	415.477	9.8e-10	1.18876	0.295	NOT	1.4098	0.158	NOT	0.804041	0.191	NOT	1.80213	0.109	NOT	0.680226	0.0497	DIFF
TU0860	1	-	26021477	26021980			AT1G69200.1		561.692	1.17e-08	670.567	0.000140143	557.75	2.72e-06	856.5	9.71e-12	0.655799	0.0977	NOT	566.827	9.95e-05	1.18302	0.135	NOT	746.892	5.44e-06	0.746761	0.299	NOT	1.19383	0.466	NOT	0.992982	0.366	NOT	0.661795	0.0131	DIFF	0.872028	0.185	NOT
TU0861	1	-	26040713	26041278			AT1G69252.1		1300.69	1.16e-11	640.76	1.59e-06	497.014	1.43e-07	1666.64	9.77e-15	0.780426	0.0635	NOT	756.11	1.06e-11	0.847443	0.114	NOT	575.302	1.2e-09	0.863918	0.3	NOT	0.492631	0.0293	NOT	0.382116	0.022	DIFF	0.453673	0.00505	DIFF	0.345187	0.000207	DIFF
TU0862	1	-	26042765	26043641			AT1G69260.1		1506.28	6.42e-16	679.928	4.13e-11	485.36	1.38e-06	797.139	2.89e-10	1.88961	0.068	NOT	433.116	4.97e-05	1.56985	0.0425	NOT	274.16	0.00337973	1.77035	0.0589	NOT	0.451395	0.0494	NOT	0.322224	0.00623	DIFF	0.543338	0.0256	DIFF	0.34393	0.00446	DIFF
TU0863	1	-	26089077	26090037			AT1G69390.1		540.876	5.98e-06	855.188	9.45e-13	223.482	0.000354114	504.481	1.62e-07	1.07214	0.147	NOT	555.683	5.21e-12	1.53899	0.11	NOT	426.149	1.37e-07	0.524422	0.118	NOT	1.58112	0.0041	DIFF	0.413185	0.0663	NOT	1.10149	0.49	NOT	0.844728	0.123	NOT
TU0864	1	-	26099704	26100633			AT1G69420.1		870.623	2.65e-08	314.678	0.00100663	516.018	1.62e-05	721.725	6.15e-09	1.20631	0.365	NOT	385.925	7.33e-07	0.815386	0.264	NOT	413.924	8.2e-05	1.24665	0.448	NOT	0.36144	0.0244	NOT	0.5927	0.073	NOT	0.534726	0.0172	DIFF	0.57352	0.12	NOT
TU0865	1	-	26145532	26147008			AT1G69530.1		475.771	2.66e-09	294.979	0.00836827	196.677	0.0136703	829.343	2.84e-10	0.573672	0.0416	NOT	333.784	0.000230006	0.883742	0.439	NOT	269.271	7.3e-05	0.730405	0.331	NOT	0.620002	0.0716	NOT	0.413386	0.0143	DIFF	0.402468	0.000635	DIFF	0.32468	0.00032	DIFF
TU0866	1	-	26219882	26221118			AT1G69690.1		387.285	2.04e-07	417.856	1.82e-10	430.711	1.28e-09	368.961	0.000143609	1.04966	0.461	NOT	493.07	6.57e-08	0.847458	0.387	NOT	500.235	2.59e-11	0.861017	0.101	NOT	1.07894	0.221	NOT	1.11213	0.453	NOT	1.33637	0.333	NOT	1.35579	0.0871	NOT
TU0867	1	+	26238989	26239943	AT1G69750	AT1G69750			3022.75	1.85e-16	3073.67	5.82e-22	3074.09	4.44e-16	3244.68	3.36e-21	0.931602	0.253	NOT	3054.98	1.1e-18	1.00612	0.395	NOT	5026.86	1.59e-24	0.611533	0.175	NOT	1.01685	0.441	NOT	1.01698	0.447	NOT	0.941535	0.389	NOT	1.54926	0.262	NOT
TU0868	1	+	26243856	26244140			AT1G69760.1		859.999	6.1e-09	881.243	1.07e-07	733.478	1.41e-07	1062.43	7.72e-07	0.809464	0.244	NOT	1257.83	5.97e-11	0.700606	0.124	NOT	624.137	3.65e-07	1.17519	0.413	NOT	1.0247	0.413	NOT	0.852882	0.144	NOT	1.18392	0.355	NOT	0.587462	0.0345	DIFF
TU0869	1	-	26262496	26264132			AT1G69780.1		461.188	2.2e-13	542.823	4.52e-12	359.978	9.04e-13	452.315	1.97e-11	1.01962	0.372	NOT	340.265	0.000190906	1.59529	0.0506	NOT	431.33	3.13e-14	0.834577	0.265	NOT	1.17701	0.444	NOT	0.780545	0.129	NOT	0.752274	0.107	NOT	0.953605	0.417	NOT
TU0870	1	-	26322867	26323519			AT1G69870.1		440.749	2.22e-10	503.255	1.91e-07	351.046	6.5e-07	279.158	0.000178858	1.57885	0.152	NOT	324.314	1.02e-05	1.55175	0.284	NOT	315.004	0.000559045	1.11442	0.401	NOT	1.14182	0.48	NOT	0.796476	0.12	NOT	1.16176	0.362	NOT	1.12841	0.354	NOT
TU0871	1	+	26352491	26352933			AT1G69960.1		574.808	4.55e-09	457.019	5.15e-09	375.05	2.02e-08	667.224	1.32e-10	0.861492	0.19	NOT	592.832	2.97e-19	0.770908	0.0428	NOT	387.45	1.28e-07	0.967996	0.492	NOT	0.795081	0.16	NOT	0.652479	0.277	NOT	0.888505	0.49	NOT	0.58069	0.0735	NOT
TU0872	1	-	26390665	26391799			AT1G70060.1		525.036	1.23e-07	577.551	1.11e-09	931.252	2.34e-08	597.538	2.05e-05	0.878665	0.32	NOT	857.291	4.52e-15	0.673693	0.119	NOT	605.965	6.6e-10	1.53681	0.366	NOT	1.10002	0.134	NOT	1.77369	0.164	NOT	1.43471	0.0622	NOT	1.0141	0.366	NOT
TU0873	1	-	26425527	26425964			AT1G70160.1		2567.4	1.39e-15	1134.36	2.7e-08	783.242	3.41e-05	2448.44	8.79e-10	1.04859	0.397	NOT	1023.19	4.7e-08	1.10865	0.146	NOT	809.429	5.04e-06	0.967648	0.397	NOT	0.441832	0.172	NOT	0.305072	0.0202	DIFF	0.417895	0.0189	DIFF	0.33059	0.0112	DIFF
TU0874	1	+	26436333	26436548			AT1G70200.1		1083.8	1.79e-10	1032.64	5.68e-06	670.493	0.0033631	430.697	7.27e-08	2.51639	0.0421	NOT	494.153	0.000113463	2.08972	0.0269	NOT	621.403	0.0332184	1.079	0.305	NOT	0.952796	0.465	NOT	0.61865	0.121	NOT	1.14733	0.324	NOT	1.44278	0.279	NOT
TU0875	1	-	26453355	26455282			AT1G70230.1		368.249	5.94e-06	411.057	7.55e-08	445.17	3.46e-06	502.051	9.49e-15	0.733489	0.0536	NOT	457.116	6.45e-07	0.89924	0.23	NOT	355.499	0.000235643	1.25224	0.366	NOT	1.11625	0.463	NOT	1.20888	0.354	NOT	0.910497	0.258	NOT	0.708093	0.22	NOT
TU0876	1	+	26469785	26470901			AT1G70280.1		754.857	1.44e-09	1242.34	7.15e-12	801.447	1.74e-07	1362.7	3.08e-12	0.553942	0.359	NOT	1208.14	4.42e-07	1.02831	0.0512	NOT	1027.86	3.19e-08	0.779724	0.257	NOT	1.6458	0.192	NOT	1.06172	0.301	NOT	0.886578	0.0989	NOT	0.754282	0.395	NOT
TU0877	1	+	26516660	26518753			AT1G70370.1		522.159	6.53e-13	495.984	9.47e-15	379.993	3.95e-15	641.844	3.39e-16	0.813529	0.203	NOT	409.84	3.69e-09	1.21019	0.499	NOT	319.674	1.55e-09	1.18869	0.292	NOT	0.949872	0.0885	NOT	0.727734	0.171	NOT	0.638535	0.0168	DIFF	0.498056	0.00878	DIFF
TU0878	1	+	26537796	26538203			AT1G70410.1		1036.03	6.06e-11	1055.56	0.000324472	898.933	5.8e-05	1510.74	1.92e-05	0.685777	0.361	NOT	857.435	5.07e-08	1.23107	0.434	NOT	666.809	1.28e-05	1.34811	0.235	NOT	1.01885	0.141	NOT	0.867671	0.139	NOT	0.56756	0.23	NOT	0.441379	0.127	NOT
TU0879	1	+	26567610	26568581			AT1G70490.1		909.276	1.58e-11	756.51	2.28e-10	669.898	1.16e-10	1080.25	5.47e-09	0.841727	0.485	NOT	1019.51	3.31e-11	0.742033	0.0472	NOT	758.438	3.81e-13	0.88326	0.0885	NOT	0.831992	0.112	NOT	0.736738	0.188	NOT	0.943772	0.322	NOT	0.702095	0.39	NOT
TU0880	1	+	26586987	26588876	AT1G70518	AT1G70518			1442.04	5.56e-14	1566.23	5.15e-14	1433.99	2.8e-12	1543.18	1.41e-11	0.93446	0.42	NOT	1600.92	2.25e-15	0.978331	0.398	NOT	1855.43	1.17e-19	0.772861	0.0132	NOT	1.08612	0.473	NOT	0.994418	0.275	NOT	1.03742	0.313	NOT	1.20234	0.0614	DIFF
TU0881	1	-	26608559	26609109			AT1G70560.1		491.148	7.51e-05	483.431	0.00087967	423.183	4.63e-05	789.002	6.19e-10	0.622493	0.0245	NOT	510.339	9.77e-05	0.947274	0.275	NOT	357.359	0.000107045	1.1842	0.311	NOT	0.984288	0.294	NOT	0.86162	0.467	NOT	0.646816	0.027	DIFF	0.452925	0.00621	DIFF
TU0882	1	+	26624824	26625614			AT1G70600.1		2921.88	2.8e-09	2876.37	4.95e-13	2169.79	3.02e-08	3834.82	2.83e-08	0.761934	0.253	NOT	3727.64	1.89e-08	0.771633	0.114	NOT	2519.75	1.01e-08	0.861113	0.34	NOT	0.984424	0.188	NOT	0.742601	0.0818	NOT	0.972051	0.127	NOT	0.657071	0.462	NOT
TU0883	1	+	26699126	26700070			AT1G70780.1,AT1G70782.1		1163.42	6.35e-10	939.885	4.66e-07	430.26	0.000607719	723.072	1.61e-08	1.609	0.102	NOT	686.572	4.9e-09	1.36895	0.399	NOT	402.401	6.69e-07	1.06923	0.375	NOT	0.807864	0.141	NOT	0.369823	0.0052	DIFF	0.949521	0.444	NOT	0.556516	0.156	NOT
TU0884	1	+	26713572	26715408			AT1G70830.1		2614.54	1.37e-18	1694.96	2.33e-13	1664.73	5.08e-10	2993.95	1.14e-14	0.873274	0.435	NOT	1606.65	7.37e-13	1.05497	0.395	NOT	1489.49	4.59e-11	1.11765	0.463	NOT	0.648282	0.0999	NOT	0.63672	0.00988	DIFF	0.536632	0.137	NOT	0.4975	0.0175	DIFF
TU0885	1	+	26718963	26722183			AT1G70850.1		1094.73	2.71e-08	576.122	1.06e-09	598.897	4.34e-05	1050.42	3.97e-11	1.04218	0.24	NOT	823.742	6.94e-08	0.699396	0.445	NOT	334.113	0.00103849	1.7925	0.189	NOT	0.526269	0.143	NOT	0.547073	0.118	NOT	0.784203	0.0423	DIFF	0.318076	0.00428	DIFF
TU0886	1	+	26729414	26730222			AT1G70890.1		852.222	2.96e-12	592.329	5.19e-08	735.689	8.08e-06	1179.13	1.74e-14	0.722755	0.0775	NOT	768.493	5.42e-12	0.770767	0.0697	NOT	897.806	1.71e-07	0.81943	0.26	NOT	0.695041	0.154	NOT	0.86326	0.283	NOT	0.651746	0.171	NOT	0.761414	0.0804	NOT
TU0887	1	-	26746064	26748412			AT1G70940.1		418.06	8.05e-12	358.066	2.46e-09	280.635	1.05e-06	341.714	2.65e-09	1.22342	0.272	NOT	331.697	2.22e-08	1.0795	0.482	NOT	368.197	5.04e-06	0.762187	0.0988	NOT	0.856494	0.145	NOT	0.671279	0.0234	DIFF	0.970686	0.294	NOT	1.0775	0.449	NOT
TU0888	1	-	26749546	26749941			AT1G70940.1		1726.47	5.73e-08	1694.8	3.69e-11	1442.68	3.21e-07	2439.26	8.99e-08	0.707784	0.358	NOT	819.007	3.05e-06	2.06934	0.0432	NOT	819.87	6.17e-06	1.75964	0.307	NOT	0.981656	0.355	NOT	0.835624	0.456	NOT	0.33576	0.0976	NOT	0.336114	0.264	NOT
TU0889	1	+	26785761	26786392					6091.15	1.35e-25	5854.27	3.58e-19	4793.88	2.22e-20	7394.51	5.07e-23	0.82374	0.236	NOT	4681.83	8.87e-23	1.25042	0.132	NOT	7701.31	3.67e-20	0.622476	0.0302	NOT	0.961111	0.435	NOT	0.787024	0.0843	NOT	0.633149	0.0291	DIFF	1.04149	0.483	NOT
TU0890	1	-	26826361	26827074			AT1G71130.1		988.365	1.24e-12	585.646	1.69e-08	635.317	2.55e-06	920.5	1.4e-10	1.07373	0.381	NOT	1269.08	9.07e-22	0.461473	0.00393	NOT	731.93	1.32e-09	0.868002	0.168	NOT	0.59254	0.0851	NOT	0.642796	0.0306	DIFF	1.37869	0.0403	DIFF	0.795144	0.212	NOT
TU0891	1	-	26834308	26836951			AT1G71170.1,AT1G71180.1		647.131	4.62e-14	645.413	9.45e-27	610.234	1.08e-15	494.525	4.85e-10	1.30859	0.0316	NOT	878.187	7.08e-20	0.734938	0.48	NOT	676.606	5.69e-18	0.901905	0.428	NOT	0.997345	0.212	NOT	0.942984	0.411	NOT	1.77582	0.00475	DIFF	1.36819	0.047	DIFF
TU0892	1	+	26892399	26893096			AT1G71350.1		223.607	3.87e-05	260.522	0.0412299	483.433	1.42e-07	409.622	3.23e-05	0.545886	0.0505	NOT	698.615	1.71e-12	0.372912	0.018	NOT	344.753	1.59e-06	1.40226	0.493	NOT	1.16509	0.275	NOT	2.16198	0.0985	NOT	1.70551	0.0552	NOT	0.841637	0.4	NOT
TU0893	1	+	26895939	26896662			AT1G71360.1		1823.45	3.13e-12	1786.63	1.79e-09	2081.55	3.17e-09	1592.19	1.22e-13	1.14525	0.498	NOT	2175.53	9.92e-27	0.821239	0.143	NOT	1759.16	2.79e-11	1.18326	0.39	NOT	0.979808	0.397	NOT	1.14154	0.361	NOT	1.36638	0.191	NOT	1.10487	0.482	NOT
TU0894	1	-	26897367	26898492	AT1G71360	AT1G71360			640.381	3.16e-07	817.144	5.69e-08	811.871	1.5e-07	578.715	5.97e-05	1.10656	0.205	NOT	1090.73	7.21e-12	0.749172	0.0301	NOT	812.788	4.94e-08	0.998872	0.477	NOT	1.27603	0.393	NOT	1.26779	0.349	NOT	1.88474	0.00734	DIFF	1.40447	0.108	NOT
TU0895	1	+	26900768	26905763			AT1G71370.1,AT1G71380.1		547.207	4.4e-23	412.381	6.26e-14	393.818	1.66e-14	458.883	4.2e-13	1.19248	0.117	NOT	578.829	8.35e-21	0.71244	0.0279	NOT	566.993	2.19e-16	0.694573	0.033	NOT	0.753611	0.00868	DIFF	0.719687	0.00815	DIFF	1.26139	0.192	NOT	1.23559	0.237	NOT
TU0896	1	-	26939642	26941052			AT1G71500.1		683.005	7.6e-09	687.901	1.24e-08	460.227	6.86e-13	769.292	6.06e-09	0.887836	0.109	NOT	618.343	3.99e-09	1.11249	0.321	NOT	519.222	1.54e-08	0.886378	0.255	NOT	1.00717	0.253	NOT	0.673827	0.129	NOT	0.803782	0.17	NOT	0.674935	0.00416	DIFF
TU0897	1	-	26967816	26970778			AT1G71695.1		789.955	6.29e-17	638.795	2.31e-12	658.552	1.13e-10	835.38	4.27e-15	0.945624	0.498	NOT	567.667	2.12e-12	1.1253	0.252	NOT	543.433	2.08e-07	1.21184	0.398	NOT	0.808647	0.139	NOT	0.833658	0.0154	DIFF	0.679531	0.0516	NOT	0.650522	0.0139	DIFF
TU0898	1	+	26977277	26977769			AT1G71710.1		628.127	5.95e-12	697.846	2.13e-05	776.573	6.59e-10	1012.99	6.52e-12	0.620072	0.112	NOT	453.784	6.11e-07	1.53784	0.292	NOT	388.288	0.00306399	1.99999	0.0789	NOT	1.111	0.439	NOT	1.23633	0.436	NOT	0.447965	0.0267	DIFF	0.383309	0.00374	DIFF
TU0899	1	-	27033732	27034719		AT1G71866	AT1G71865.1		465.57	1.48e-09	214.609	0.00557224	328.24	8.8e-06	517.416	5.86e-11	0.899798	0.182	NOT	350.245	2.16e-07	0.61274	0.0826	NOT	246.885	0.00557308	1.32953	0.121	NOT	0.46096	0.0084	DIFF	0.705028	0.107	NOT	0.676912	0.0275	DIFF	0.47715	0.00119	DIFF
TU0900	1	-	27096731	27097436			AT1G71970.1		835.85	2.99e-12	786.309	7.17e-13	464.733	1.05e-06	889.042	3.18e-13	0.940169	0.257	NOT	526.616	0.000874087	1.49314	0.0295	NOT	624.852	3.86e-05	0.743749	0.45	NOT	0.94073	0.455	NOT	0.556	0.0499	NOT	0.592341	0.065	NOT	0.702837	0.202	NOT
TU0901	1	-	27102951	27104150			AT1G71980.1,AT1G71990.1		358.866	3.21e-08	408.248	1.56e-11	284.765	1.88e-05	452.86	1.25e-13	0.792444	0.158	NOT	309.918	6.03e-06	1.31728	0.00715	NOT	246.665	0.00229764	1.15446	0.449	NOT	1.13761	0.0594	NOT	0.793513	0.169	NOT	0.684357	0.046	DIFF	0.544683	0.0281	DIFF
TU0902	1	-	27111147	27112839			AT1G72010.1		424.038	1.37e-09	328.46	8.69e-08	379.801	9.05e-09	369.028	9.26e-10	1.14907	0.172	NOT	389.154	1.33e-14	0.844036	0.346	NOT	252.593	7.08e-06	1.50361	0.215	NOT	0.7746	0.18	NOT	0.895677	0.0942	NOT	1.05454	0.363	NOT	0.684482	0.139	NOT
TU0903	1	-	27114551	27115468			AT1G72030.1		1594.73	4.1e-23	1252.34	2.02e-23	1000.61	1.52e-24	1888.67	9.13e-26	0.844367	0.38	NOT	1426.04	2.66e-26	0.878194	0.394	NOT	944.375	8.5e-24	1.05955	0.365	NOT	0.785299	0.182	NOT	0.627448	0.0813	NOT	0.75505	0.37	NOT	0.500021	0.194	NOT
TU0904	1	-	27130022	27132396			AT1G72100.1		364.067	5.95e-09	528.434	4.26e-11	475.072	6.73e-09	435.372	3.75e-07	0.836221	0.181	NOT	544.658	1.08e-20	0.970213	0.496	NOT	653.625	3.58e-12	0.726827	0.14	NOT	1.45147	0.291	NOT	1.3049	0.472	NOT	1.25102	0.427	NOT	1.5013	0.404	NOT
TU0905	1	-	27152076	27153480			AT1G72150.1		1349.26	2.04e-20	755.891	1.52e-14	684.793	5.09e-17	1604.14	6.41e-17	0.841111	0.45	NOT	708.068	1.1e-12	1.06754	0.27	NOT	876.187	6.44e-15	0.78156	0.468	NOT	0.560226	0.0897	NOT	0.507532	0.0499	NOT	0.4414	0.0307	DIFF	0.546204	0.0405	DIFF
TU0906	1	+	27157469	27159365			AT1G72160.1		529.547	2.13e-10	480.501	3.69e-12	359.281	8.69e-08	763.302	2.24e-14	0.693758	0.0232	NOT	452.205	7.6e-08	1.06257	0.294	NOT	455.186	9.61e-11	0.789306	0.11	NOT	0.907381	0.327	NOT	0.678469	0.263	NOT	0.592433	0.0274	DIFF	0.596338	0.0592	DIFF
TU0907	1	+	27171404	27172072			AT1G72190.1		271.434	0.00043538	448.771	3.92e-08	265.904	0.00905889	326.918	0.000630513	0.830282	0.193	NOT	431.387	2.89e-12	1.0403	0.434	NOT	468.285	9.53e-09	0.567825	0.0147	NOT	1.65333	0.0806	NOT	0.979627	0.451	NOT	1.31956	0.31	NOT	1.43242	0.0987	NOT
TU0908	1	+	27187948	27189229			AT1G72220.1		430.311	1.39e-11	308.945	0.000761103	509.639	2.65e-09	418.601	1.23e-12	1.02797	0.353	NOT	407.127	3.69e-09	0.758842	0.0828	NOT	471.188	2.67e-13	1.0816	0.379	NOT	0.717957	0.0145	DIFF	1.18435	0.444	NOT	0.97259	0.327	NOT	1.12563	0.33	NOT
TU0909	1	+	27213554	27216579			AT1G72270.1,AT1G72280.1		422.605	9.2e-11	509.435	1.02e-11	635.712	1.56e-15	365.282	1.6e-09	1.15693	0.449	NOT	317.637	7.93e-07	1.60383	0.00924	NOT	328.88	6.54e-07	1.93296	0.0331	NOT	1.20546	0.0427	NOT	1.50427	0.0531	NOT	0.869567	0.34	NOT	0.900345	0.424	NOT
TU0910	1	+	27246955	27247790			AT1G72370.1		928.392	2.26e-10	624.801	5.98e-10	576.267	5.87e-13	862.694	1.5e-13	1.07615	0.293	NOT	584.532	3.38e-08	1.06889	0.188	NOT	415.98	1.36e-07	1.38532	0.281	NOT	0.672993	0.188	NOT	0.620715	0.217	NOT	0.677566	0.0094	DIFF	0.482187	0.0243	DIFF
TU0911	1	-	27253347	27255154			AT1G72390.1		586.228	6.95e-10	496.786	4.26e-11	548.477	1.1e-12	462.21	1.18e-07	1.26832	0.185	NOT	611.431	2.03e-09	0.812497	0.15	NOT	531.95	7.98e-12	1.03107	0.375	NOT	0.847428	0.0958	NOT	0.935604	0.399	NOT	1.32284	0.318	NOT	1.15088	0.265	NOT
TU0912	1	+	27262835	27265403			AT1G72416.1,AT1G72420.1		511.269	6.82e-08	1115.48	1.37e-12	662.552	6.36e-07	467.516	0.000116979	1.09359	0.46	NOT	989.932	9.96e-10	1.12682	0.203	NOT	764.365	1.29e-09	0.866801	0.0737	NOT	2.18179	0.0152	DIFF	1.2959	0.369	NOT	2.11743	0.000965	DIFF	1.63495	0.0834	NOT
TU0913	1	+	27271835	27272406			AT1G72440.1		1026.85	7.56e-12	1192.77	2.75e-14	1166.69	3.45e-07	1301.77	1.54e-08	0.788811	0.239	NOT	1528.5	2.13e-08	0.780353	0.441	NOT	1284.97	2.2e-06	0.907951	0.355	NOT	1.16158	0.175	NOT	1.13618	0.47	NOT	1.17417	0.424	NOT	0.987094	0.152	NOT
TU0914	1	-	27307013	27308138			AT1G72510.1		930.866	1.99e-07	679.408	9.33e-06	499.165	6.33e-08	981.062	2.1e-11	0.948835	0.409	NOT	842.328	3.29e-13	0.806584	0.186	NOT	717.828	5.65e-05	0.695382	0.143	NOT	0.729867	0.128	NOT	0.536237	0.0174	DIFF	0.858588	0.39	NOT	0.731685	0.127	NOT
TU0915	1	+	27317757	27320394			AT1G72540.1		250.971	0.000516662	536.096	4.55e-11	412.782	2.87e-11	299.4	3.79e-06	0.838246	0.387	NOT	352.318	1.32e-07	1.52163	0.0677	NOT	504.811	1.45e-09	0.817696	0.295	NOT	2.13609	0.00499	DIFF	1.64474	0.00398	DIFF	1.17675	0.161	NOT	1.68608	0.00432	DIFF
TU0916	1	-	27333141	27333442	AT1G72560	AT1G72560			890.278	2.97e-10	752.11	6.49e-16	407.548	1.58e-10	770.806	4.59e-14	1.155	0.261	NOT	325.385	5.55e-06	2.31145	0.00417	NOT	655.016	7.06e-15	0.622195	0.105	NOT	0.844804	0.173	NOT	0.457776	0.016	DIFF	0.422136	0.00164	DIFF	0.849781	0.277	NOT
TU0917	1	+	27342772	27343943	AT1G72600	AT1G72600	AT1G72610.1		642.345	1.19e-12	551.863	2.94e-09	389.613	3.07e-07	634.124	3.2e-12	1.01296	0.449	NOT	470.572	3.52e-05	1.17275	0.247	NOT	561.839	2.64e-07	0.69346	0.463	NOT	0.859138	0.179	NOT	0.606548	0.162	NOT	0.742082	0.0393	DIFF	0.886008	0.173	NOT
TU0918	1	-	27344917	27345349			AT1G72620.1		559.368	0.000293979	588.263	0.00623537	817.413	6.13e-09	761.203	0.000102474	0.734847	0.261	NOT	714.431	2.99e-07	0.823401	0.398	NOT	971.315	1.58e-05	0.841553	0.491	NOT	1.05166	0.456	NOT	1.46132	0.126	NOT	0.938555	0.277	NOT	1.27603	0.268	NOT
TU0919	1	-	27352306	27352957			AT1G72645.1		1814.34	4.06e-11	1136.81	2.63e-08	1090.16	5.43e-08	1437.6	2.51e-11	1.26206	0.226	NOT	720.577	2.03e-07	1.57764	0.119	NOT	798.211	2.98e-05	1.36575	0.448	NOT	0.626569	0.0807	NOT	0.600858	0.0294	DIFF	0.501236	0.09	NOT	0.555239	0.0426	DIFF
TU0920	1	-	27355005	27357143			AT1G72650.1		268.58	2.69e-05	286.693	1.06e-09	318.496	6.13e-09	243.466	1.01e-06	1.10315	0.197	NOT	310.202	4.81e-08	0.924214	0.29	NOT	253.123	0.0001852	1.25827	0.229	NOT	1.06744	0.219	NOT	1.18585	0.446	NOT	1.27411	0.278	NOT	1.03966	0.419	NOT
TU0921	1	+	27369563	27370526	AT1G72700	AT1G72700			640.402	3.06e-05	811.262	3.23e-05	1027.95	1.45e-09	957.979	3.54e-08	0.668493	0.0825	NOT	533.273	0.00149242	1.52129	0.131	NOT	821.481	4.41e-05	1.25134	0.182	NOT	1.2668	0.234	NOT	1.60516	0.0329	DIFF	0.556665	0.0247	DIFF	0.857515	0.276	NOT
TU0922	1	-	27387120	27387793			AT1G72750.1		469.538	2.23e-08	691.554	4.45e-12	494.851	1.03e-11	660.734	1.56e-09	0.710631	0.233	NOT	568.99	2.22e-08	1.21541	0.487	NOT	523.418	1.09e-07	0.945422	0.348	NOT	1.47284	0.374	NOT	1.05391	0.29	NOT	0.861148	0.319	NOT	0.792177	0.26	NOT
TU0923	1	-	27407716	27408111			AT1G72820.1		806.846	1.17e-08	680.3	4.63e-08	680.825	1.11e-08	1187.25	1.08e-10	0.679592	0.17	NOT	803.368	1.23e-09	0.84681	0.383	NOT	557.225	2.33e-07	1.22181	0.431	NOT	0.84316	0.324	NOT	0.84381	0.296	NOT	0.676663	0.124	NOT	0.469341	0.0246	DIFF
TU0924	1	-	27456516	27459541			AT1G72970.1		675.02	2.03e-10	493.797	4.81e-08	300.966	0.0027713	703.498	1.07e-15	0.959519	0.216	NOT	294.112	2.41e-05	1.67894	0.0372	NOT	380.853	5.22e-07	0.790242	0.222	NOT	0.731529	0.303	NOT	0.445862	0.0135	DIFF	0.418071	0.00163	DIFF	0.54137	0.0144	DIFF
TU0925	1	-	27477454	27478635			AT1G73030.1		1808.16	4.03e-17	1710.06	3.13e-27	842.601	1.97e-15	1672.71	4.02e-13	1.08098	0.342	NOT	1766.69	3.08e-24	0.967946	0.426	NOT	1105.11	9.25e-19	0.762459	0.0801	NOT	0.945746	0.496	NOT	0.465999	0.00626	DIFF	1.05618	0.287	NOT	0.66067	0.118	NOT
TU0926	1	+	27508391	27509948			AT1G73150.1		315.314	6.16e-06	326.515	1.59e-06	272.668	9.53e-06	270.508	8.69e-06	1.16564	0.221	NOT	339.536	1.85e-07	0.961651	0.484	NOT	394.961	4.91e-09	0.690367	0.0981	NOT	1.03552	0.315	NOT	0.864751	0.423	NOT	1.25518	0.122	NOT	1.46007	0.0298	DIFF
TU0927	1	+	27544005	27544338			AT1G73230.1		3416.49	1.68e-09	2293.51	1.27e-06	1931.38	7.93e-09	4478.4	3.82e-12	0.762882	0.282	NOT	2660.77	1.49e-12	0.861972	0.476	NOT	1679.42	7.67e-10	1.15003	0.372	NOT	0.671306	0.441	NOT	0.565311	0.258	NOT	0.594134	0.302	NOT	0.375004	0.247	NOT
TU0928	1	+	27550869	27552858			AT1G73260.1		812.613	1.2e-10	1135.85	3.59e-14	782.791	7.09e-13	999.946	9.94e-18	0.812657	0.0438	NOT	1017.46	1.22e-18	1.11636	0.343	NOT	1060.36	3.33e-17	0.738231	0.304	NOT	1.39777	0.0779	NOT	0.963301	0.322	NOT	1.01751	0.482	NOT	1.06042	0.282	NOT
TU0929	1	+	27571407	27573378			AT1G73330.1		796.677	7.38e-10	535.857	2.71e-08	334.737	1.04e-06	894.153	1.69e-10	0.890985	0.472	NOT	427.074	1.06e-06	1.25472	0.177	NOT	365.085	1.46e-05	0.916874	0.427	NOT	0.672615	0.297	NOT	0.420167	0.0448	NOT	0.47763	0.0635	NOT	0.408303	0.0229	DIFF
TU0930	1	+	27584875	27585658			AT1G73360.1		416.405	7.92e-09	386.229	5.5e-05	381.219	1.03e-06	242.578	0.000255921	1.71658	0.017	NOT	464.314	2.05e-06	0.831827	0.465	NOT	350.552	1.68e-08	1.08748	0.487	NOT	0.927532	0.23	NOT	0.915501	0.171	NOT	1.91408	0.11	NOT	1.44511	0.111	NOT
TU0931	1	-	27614999	27615953			AT1G73440.1		438.821	1.67e-07	313.8	9.03e-05	290.928	0.00229697	452.679	4.06e-10	0.969387	0.295	NOT	365.193	1.69e-06	0.859272	0.315	NOT	347.247	4.51e-05	0.837813	0.47	NOT	0.715098	0.104	NOT	0.662976	0.134	NOT	0.806737	0.4	NOT	0.767093	0.256	NOT
TU0932	1	+	27623344	27623775					641.598	4.95e-16	911.174	2.35e-20	691.974	1.32e-14	1142.15	1.01e-20	0.561746	0.168	NOT	940.483	1.12e-18	0.968836	0.271	NOT	808.048	9.54e-27	0.856353	0.0586	NOT	1.42016	0.375	NOT	1.07852	0.277	NOT	0.823432	0.433	NOT	0.70748	0.415	NOT
TU0933	1	-	27632927	27633549			AT1G73480.1		426.129	1.2e-05	571.083	1.73e-06	990.927	8.03e-10	396.125	0.00108444	1.07574	0.43	NOT	1564.58	6.66e-10	0.365007	0.0482	NOT	1218.13	9.35e-13	0.813482	0.162	NOT	1.34016	0.404	NOT	2.32542	0.256	NOT	3.94971	0.0186	DIFF	3.07512	0.0379	DIFF
TU0934	1	-	27673956	27674369			AT1G73600.1,AT1G73602.1		316.584	9.91e-07	1423.91	1.54e-08	1151.99	3.51e-13	515.381	0.00163558	0.614272	0.339	NOT	538.26	4.53e-06	2.64539	0.0406	NOT	993.08	2.47e-10	1.16002	0.374	NOT	4.49773	0.00545	DIFF	3.63881	0.00241	DIFF	1.04439	0.312	NOT	1.92689	0.053	DIFF
TU0935	1	-	27676520	27677205			AT1G73600.1,AT1G73602.1		493.63	5.01e-07	738.018	1.87e-16	590.832	1.88e-11	693.465	2.09e-09	0.711831	0.123	NOT	745.692	2.07e-05	0.989709	0.291	NOT	349.375	0.000645881	1.69111	0.102	NOT	1.49508	0.286	NOT	1.19691	0.396	NOT	1.07531	0.117	NOT	0.503811	0.0158	DIFF
TU0936	1	+	27727920	27728186					2783.37	3.98e-21	5550.77	1.57e-24	4592.18	3.29e-24	2925.57	1.82e-19	0.951394	0.352	NOT	3262.03	3.21e-21	1.70163	0.0409	NOT	6811.02	3.41e-27	0.674228	0.05	NOT	1.99426	0.0134	DIFF	1.64986	0.0605	NOT	1.11501	0.295	NOT	2.3281	0.00107	DIFF
TU0937	1	+	27734230	27735693			AT1G73730.1		553.221	2.44e-13	575.322	4.27e-08	396.43	2.02e-08	511.982	3.39e-12	1.08055	0.319	NOT	408.509	2.93e-05	1.40835	0.123	NOT	395.417	2.87e-06	1.00256	0.325	NOT	1.03995	0.268	NOT	0.716585	0.085	NOT	0.797897	0.084	NOT	0.772326	0.129	NOT
TU0938	1	-	27764174	27765012			AT1G73830.1		1960.5	0.00435738	2757.57	0.000728567	2948.76	0.00321642	1315.89	6.73e-05	1.48987	0.321	NOT	5347.4	1.73e-09	0.515684	0.247	NOT	2419.2	0.000431111	1.2189	0.488	NOT	1.40656	0.306	NOT	1.50409	0.406	NOT	4.06371	0.228	NOT	1.83845	0.455	NOT
TU0939	1	-	27782661	27785088			AT1G73870.1,AT1G73875.1		518.456	2.64e-09	817.087	1.29e-19	543.912	3.72e-13	645.108	2.98e-12	0.803673	0.0815	NOT	544.532	1.47e-16	1.50053	0.0267	NOT	511.639	2.2e-09	1.06308	0.199	NOT	1.576	0.00656	DIFF	1.0491	0.238	NOT	0.844094	0.184	NOT	0.793106	0.0683	NOT
TU0940	1	-	27788486	27791342			AT1G73875.1,AT1G73880.1,AT1G73885.1		511.057	2.2e-13	435.37	1.29e-20	425.695	8.84e-12	438.37	4.33e-11	1.16581	0.31	NOT	573.796	1.1e-23	0.758754	0.249	NOT	409.567	2.41e-13	1.03938	0.366	NOT	0.851901	0.375	NOT	0.83297	0.33	NOT	1.30893	0.224	NOT	0.934295	0.367	NOT
TU0941	1	-	27797407	27798672			AT1G73920.1		840.56	7.45e-13	933.047	1.57e-11	551.063	3.13e-14	1003.34	5.94e-20	0.837762	0.493	NOT	786.915	2.69e-11	1.1857	0.482	NOT	503.305	7.59e-12	1.09489	0.486	NOT	1.11003	0.471	NOT	0.65559	0.106	NOT	0.784295	0.443	NOT	0.50163	0.0544	DIFF
TU0942	1	+	27854666	27856857			AT1G74060.1,AT1G74070.1		704.959	5.04e-18	656.454	8.71e-23	685.227	1.64e-17	697.918	8.35e-21	1.01009	0.484	NOT	518.435	6.16e-16	1.26622	0.242	NOT	433.091	1.05e-12	1.58218	0.0986	NOT	0.931195	0.095	NOT	0.97201	0.218	NOT	0.742831	0.0203	DIFF	0.620547	0.0152	DIFF
TU0943	1	-	27866588	27867741			AT1G74090.1		334.592	4.77e-07	325.332	9.02e-09	360.305	7.18e-12	685.305	3.4e-17	0.488238	0.0215	NOT	384.87	1.08e-06	0.845304	0.42	NOT	272.946	2.99e-08	1.32006	0.283	NOT	0.972325	0.475	NOT	1.07685	0.391	NOT	0.561604	0.0236	DIFF	0.398284	0.00941	DIFF
TU0944	1	-	27920246	27920650			AT1G74230.1		1164.04	1.21e-05	1997.13	1.47e-11	1092.8	3.01e-08	2069.97	2.27e-08	0.562346	0.184	NOT	2447.52	1.58e-12	0.815981	0.376	NOT	1154.29	6.62e-09	0.946729	0.176	NOT	1.71569	0.0712	NOT	0.938799	0.411	NOT	1.18239	0.214	NOT	0.557636	0.31	NOT
TU0945	1	-	27923393	27925751			AT1G74250.1		893.463	3.35e-09	594.336	3.29e-12	721.014	1.73e-11	1102.93	2.67e-11	0.810081	0.481	NOT	796.85	4.21e-08	0.745857	0.497	NOT	849.667	2.13e-11	0.848584	0.443	NOT	0.665205	0.272	NOT	0.806988	0.438	NOT	0.722485	0.262	NOT	0.770373	0.363	NOT
TU0946	1	+	27987996	27988206					612.101	1.06e-05	886.081	2.64e-09	1541.18	3.36e-15	338.28	2.38e-07	1.80945	0.14	NOT	945.813	3.72e-13	0.936846	0.306	NOT	1882.44	1.21e-12	0.818714	0.219	NOT	1.44761	0.317	NOT	2.51785	0.0134	DIFF	2.79595	0.0102	DIFF	5.56474	0.000719	DIFF
TU0947	1	-	27994825	27996558			AT1G74470.1		1835.54	2.79e-21	2061.44	1.51e-30	1067.32	2.38e-16	2324.71	9.38e-37	0.789578	0.0143	NOT	2050.34	4.29e-26	1.00541	0.496	NOT	1145.18	5.9e-14	0.932011	0.373	NOT	1.12307	0.122	NOT	0.581475	0.112	NOT	0.881977	0.114	NOT	0.492612	0.000576	DIFF
TU0948	1	-	28009716	28011107			AT1G74510.1		529.984	3.83e-11	659.061	6.82e-12	551.494	1.12e-07	613.833	3.48e-07	0.863401	0.498	NOT	821.943	2.27e-11	0.801833	0.413	NOT	505.544	3.8e-10	1.09089	0.338	NOT	1.24355	0.249	NOT	1.04059	0.453	NOT	1.33903	0.172	NOT	0.823586	0.372	NOT
TU0949	1	+	28027012	28028347			AT1G74590.1		519.125	3.63e-12	562.08	1.49e-09	479.066	1.23e-11	492.525	3.39e-12	1.05401	0.375	NOT	513.26	7.5e-12	1.09512	0.259	NOT	380.702	1.2e-08	1.25838	0.146	NOT	1.08275	0.319	NOT	0.922834	0.202	NOT	1.0421	0.211	NOT	0.77296	0.0651	DIFF
TU0950	1	-	28056890	28057632			AT1G74670.1		1241.32	3.01e-08	823.735	5.41e-08	574.282	6.01e-10	1668.7	7.07e-12	0.743884	0.238	NOT	1087.47	1.91e-11	0.757478	0.281	NOT	484.793	9.86e-07	1.18459	0.317	NOT	0.663596	0.261	NOT	0.462638	0.0921	NOT	0.651687	0.183	NOT	0.290521	0.0551	DIFF
TU0951	1	+	28064913	28066337			AT1G74690.1		586.591	1.52e-12	422.361	6.89e-08	370.519	1.8e-10	485.7	5.14e-11	1.20772	0.147	NOT	337.937	7.56e-12	1.24982	0.187	NOT	238.197	3.43e-05	1.55551	0.067	NOT	0.720026	0.0867	NOT	0.631648	0.0153	DIFF	0.695773	0.195	NOT	0.49042	0.0076	DIFF
TU0952	1	-	28078790	28083490			AT1G74720.1,AT1G74730.1		383.285	2.92e-13	415.182	3.04e-15	366.196	5.42e-11	402.814	4.26e-14	0.951519	0.341	NOT	413.115	2.69e-11	1.005	0.469	NOT	324.462	1.17e-12	1.12863	0.394	NOT	1.08322	0.181	NOT	0.955414	0.182	NOT	1.02557	0.35	NOT	0.805488	0.223	NOT
TU0953	1	+	28120715	28121235			AT1G74840.1		789.991	2.28e-07	542.969	4.86e-11	423.218	0.0002471	716.194	1.36e-07	1.10304	0.26	NOT	513.543	0.000611007	1.0573	0.271	NOT	440.481	0.000642981	0.960809	0.297	NOT	0.68731	0.256	NOT	0.535725	0.0695	NOT	0.717045	0.0383	DIFF	0.61503	0.0343	DIFF
TU0954	1	-	28147764	28151041			AT1G74930.1,AT1G74940.1		591.94	2.94e-16	480.594	5.93e-11	591.661	2e-16	564.697	6.85e-13	1.04824	0.231	NOT	469.778	4.53e-15	1.02302	0.399	NOT	625.018	5.94e-16	0.94663	0.417	NOT	0.811896	0.143	NOT	0.999529	0.423	NOT	0.831912	0.295	NOT	1.10682	0.223	NOT
TU0955	1	+	28161180	28161686			AT1G74970.1		1776.37	6.01e-11	2026.63	7.79e-10	1187.38	1.28e-07	2399.45	2.21e-09	0.740324	0.279	NOT	1343.9	1.32e-11	1.50802	0.364	NOT	1492.1	1.11e-08	0.795778	0.45	NOT	1.14088	0.462	NOT	0.668431	0.167	NOT	0.560087	0.103	NOT	0.621851	0.0685	NOT
TU0956	1	+	28220932	28221832			AT1G75180.1		636.075	3.44e-12	429.546	4.53e-09	272.153	0.00110935	535.977	1.24e-07	1.18676	0.494	NOT	374.065	6.54e-05	1.14832	0.355	NOT	272.095	1.59e-06	1.00021	0.474	NOT	0.675307	0.175	NOT	0.427863	0.00903	DIFF	0.697912	0.088	NOT	0.507662	0.00873	DIFF
TU0957	1	-	28223210	28223767			AT1G75190.1		1023.88	1.05e-12	1108.24	6.79e-08	1040.38	1.38e-06	932.508	2.42e-07	1.09799	0.307	NOT	995.931	1.18e-10	1.11277	0.356	NOT	1402.29	7.8e-10	0.741915	0.184	NOT	1.08239	0.225	NOT	1.01612	0.323	NOT	1.06801	0.375	NOT	1.50378	0.189	NOT
TU0958	1	-	28243266	28246214			AT1G75240.1		692.229	2.84e-10	872.546	3.34e-13	723.961	5.8e-15	880.929	3.57e-12	0.785794	0.495	NOT	776.711	2.42e-12	1.12339	0.203	NOT	547.553	4.48e-13	1.32218	0.336	NOT	1.26049	0.298	NOT	1.04584	0.445	NOT	0.881695	0.396	NOT	0.621563	0.421	NOT
TU0959	1	+	28253918	28254920			AT1G75270.1		239.078	1.39e-07	249.952	0.000302547	234.808	0.000234231	180.95	0.00172041	1.32124	0.0853	NOT	378.616	1.8e-09	0.660173	0.159	NOT	251.232	3.54e-05	0.934626	0.128	NOT	1.04548	0.46	NOT	0.98214	0.0982	NOT	2.09238	0.0133	DIFF	1.38841	0.118	NOT
TU0960	1	-	28256244	28257709			AT1G75280.1,AT1G75290.1		434.28	0.000220125	637.761	1.57e-12	547.877	0.00172819	506.359	2.05e-08	0.857652	0.273	NOT	1009.54	7.47e-14	0.631734	0.296	NOT	666.677	4.65e-10	0.821803	0.165	NOT	1.46855	0.126	NOT	1.26158	0.385	NOT	1.99372	0.183	NOT	1.31661	0.42	NOT
TU0961	1	-	28275776	28276425			AT1G75350.1		2239.64	2.75e-15	2261.76	1.29e-12	1166.51	6.13e-09	3318.62	4.83e-18	0.674871	0.17	NOT	2196.76	2.27e-15	1.02959	0.456	NOT	1796.08	4.61e-14	0.649476	0.155	NOT	1.00988	0.289	NOT	0.520847	0.0373	NOT	0.66195	0.0807	NOT	0.541213	0.0421	DIFF
TU0962	1	-	28278677	28279551			AT1G75360.1		1866.44	5.23e-16	1206.25	9.14e-14	1553.48	9.4e-18	1669.61	1.59e-12	1.11789	0.259	NOT	1606.08	5.61e-18	0.751052	0.189	NOT	1602	2.19e-12	0.969713	0.339	NOT	0.646284	0.159	NOT	0.832322	0.239	NOT	0.961949	0.296	NOT	0.959506	0.33	NOT
TU0963	1	+	28285612	28286008			AT1G75380.1		794.187	7.28e-07	597.72	7.94e-05	697.93	1.02e-09	638.98	9.75e-11	1.2429	0.336	NOT	637.072	2.07e-06	0.93823	0.331	NOT	599.267	2.69e-06	1.16464	0.236	NOT	0.752619	0.339	NOT	0.878798	0.351	NOT	0.997014	0.0798	NOT	0.937849	0.0589	DIFF
TU0964	1	+	28286747	28287304			AT1G75380.1		874.528	6.01e-11	1045.4	8.27e-14	604.084	1.22e-08	1367.39	4.2e-16	0.63956	0.055	NOT	1173.14	2.65e-12	0.891113	0.495	NOT	745.11	1.12e-08	0.810731	0.466	NOT	1.19539	0.196	NOT	0.690754	0.302	NOT	0.857941	0.177	NOT	0.544914	0.0124	DIFF
TU0965	1	-	28331559	28332603			AT1G75460.1		716.051	3.28e-13	692.027	2.14e-11	392.741	4.07e-07	633.529	2e-08	1.13026	0.299	NOT	483.104	4.81e-08	1.43246	0.128	NOT	498.09	5.1e-08	0.788494	0.224	NOT	0.966449	0.488	NOT	0.548482	0.0504	NOT	0.76256	0.323	NOT	0.786215	0.0433	DIFF
TU0966	1	-	28339259	28340346			AT1G75490.1		453.661	1.25e-13	535.862	3.73e-11	296.383	7.66e-05	970.834	2.17e-19	0.46729	0.000556	DIFF	505.092	6.11e-05	1.06092	0.303	NOT	313.33	0.00189348	0.945913	0.383	NOT	1.18119	0.333	NOT	0.653314	0.0421	NOT	0.520266	0.000648	DIFF	0.322743	1e-06	DIFF
TU0967	1	+	28341586	28342137			AT1G75500.1		1430.37	2.59e-15	649.713	2.35e-11	1040.21	5.05e-10	1576.55	5.48e-12	0.907279	0.145	NOT	429.917	0.000230043	1.51125	0.238	NOT	710.502	1.94e-10	1.46405	0.104	NOT	0.454227	0.0809	NOT	0.727231	0.38	NOT	0.272695	0.00063	DIFF	0.450669	0.00487	DIFF
TU0968	1	-	28417962	28418493			AT1G75660.1		796.59	2.23e-08	667.935	4.26e-11	531.731	4.79e-06	771.219	1.07e-06	1.0329	0.424	NOT	512.01	0.001781	1.30454	0.137	NOT	454.466	5.47e-05	1.17001	0.162	NOT	0.838493	0.405	NOT	0.667509	0.437	NOT	0.663897	0.135	NOT	0.589283	0.163	NOT
TU0969	1	+	28420729	28421635			AT1G75680.1		1447.95	1.71e-09	1038.58	4.42e-07	645.858	2.7e-07	945.771	1.93e-07	1.53097	0.242	NOT	996.514	4.25e-13	1.04221	0.467	NOT	992.17	1.12e-11	0.650955	0.421	NOT	0.717276	0.303	NOT	0.44605	0.0721	NOT	1.05365	0.467	NOT	1.04906	0.222	NOT
TU0970	1	+	28423930	28427671			AT1G75690.1		531.359	2.85e-09	1134.3	4.74e-24	1339.02	1.04e-26	471.698	2.37e-15	1.12648	0.269	NOT	1060.2	3.37e-20	1.06989	0.216	NOT	1003.61	6.38e-21	1.3342	0.0962	NOT	2.13471	0.000117	DIFF	2.51999	1.92e-05	DIFF	2.24762	0.000647	DIFF	2.12765	4.46e-05	DIFF
TU0971	1	-	28434192	28434761			AT1G75710.1		729.633	8.56e-11	525.875	4.12e-06	452.116	1.05e-06	661.222	1.54e-08	1.10346	0.203	NOT	571.934	2.84e-07	0.919468	0.4	NOT	334.279	0.015795	1.35251	0.356	NOT	0.720739	0.0633	NOT	0.619649	0.0613	NOT	0.864965	0.366	NOT	0.505547	0.16	NOT
TU0972	1	+	28445347	28446435			AT1G75750.1		382.562	0.00596419	1666.45	5.28e-09	1847.51	8.28e-10	626.125	0.0234032	0.610999	0.261	NOT	2510.82	4.9e-10	0.663707	0.207	NOT	2625.74	2.5e-12	0.703615	0.302	NOT	4.35603	0.000371	DIFF	4.82931	0.00194	DIFF	4.01009	0.000434	DIFF	4.19364	0.00537	DIFF
TU0973	1	+	28455016	28456050			AT1G75780.1		415.837	1.32e-09	324.152	6.49e-06	288.089	3.34e-05	366.009	4.99e-06	1.13614	0.238	NOT	247.815	0.000645627	1.30804	0.226	NOT	273.345	0.000237355	1.05394	0.238	NOT	0.779517	0.0967	NOT	0.692793	0.0285	DIFF	0.677074	0.105	NOT	0.746826	0.345	NOT
TU0974	1	+	28467251	28471521			AT1G75820.1		263.591	0.000640906	244.228	0.000409231	298.31	2.25e-06	315.15	2.69e-11	0.836399	0.0485	NOT	379.372	3.79e-14	0.643769	0.00333	NOT	270.14	8.35e-07	1.10428	0.486	NOT	0.926541	0.208	NOT	1.13172	0.23	NOT	1.20378	0.322	NOT	0.857179	0.17	NOT
TU0975	1	-	28480770	28481234			AT1G75840.1		1628.27	9.98e-14	948.343	2.04e-07	758.694	5.06e-06	2002.62	6.85e-13	0.81307	0.367	NOT	970.559	1.08e-06	0.97711	0.141	NOT	839.76	4.08e-12	0.903465	0.232	NOT	0.582424	0.19	NOT	0.465951	0.0283	DIFF	0.484645	0.0255	DIFF	0.419331	0.0608	DIFF
TU0976	1	+	28486320	28488812			AT1G75850.1,AT1G75860.1		325.48	0.00252564	568.661	1.14e-08	447.696	2.3e-05	450.045	1.88e-05	0.723217	0.317	NOT	1152.58	3.79e-17	0.493381	0.00154	DIFF	869.782	2.22e-17	0.514722	0.000562	DIFF	1.74715	0.0683	NOT	1.37549	0.353	NOT	2.56103	0.000322	DIFF	1.93266	0.000547	DIFF
TU0977	1	-	28518919	28523352					2618.75	3.01e-10	2690.69	4.24e-14	3365.9	6.39e-11	3074.17	3.24e-11	0.851856	0.281	NOT	2285.62	3.16e-09	1.17723	0.259	NOT	2162.47	1.8e-10	1.55651	0.357	NOT	1.02747	0.362	NOT	1.28531	0.302	NOT	0.743492	0.261	NOT	0.703432	0.338	NOT
TU0978	1	+	28531801	28532850			AT1G76010.1		648.8	4.06e-11	397.49	4.94e-05	565.648	1.25e-09	823.378	5.59e-14	0.787973	0.188	NOT	650.036	2.44e-08	0.611489	0.237	NOT	848.511	3.51e-13	0.666636	0.0485	NOT	0.612654	0.0559	NOT	0.871837	0.134	NOT	0.789475	0.0747	NOT	1.03052	0.471	NOT
TU0979	1	-	28540252	28542996			AT1G76030.1		2069.18	8.13e-16	2112.46	4.08e-12	1466.32	1.01e-08	1899.33	2.65e-10	1.08943	0.422	NOT	1789.83	2.65e-11	1.18026	0.496	NOT	1520.82	9.15e-08	0.964164	0.302	NOT	1.02092	0.251	NOT	0.708648	0.0102	DIFF	0.942348	0.238	NOT	0.800714	0.0429	DIFF
TU0980	1	+	28552742	28554642			AT1G76080.1		568.719	1.05e-07	1653.29	3.65e-12	1180.79	2.82e-12	682.062	1.17e-14	0.833823	0.317	NOT	890.438	7.85e-15	1.85672	0.289	NOT	650.732	1.52e-16	1.81456	0.35	NOT	2.90704	0.0262	NOT	2.07623	0.15	NOT	1.30551	0.19	NOT	0.954066	0.355	NOT
TU0981	1	+	28558921	28559793			AT1G76100.1		698.481	3.1e-14	689.278	8.11e-15	544.526	5.42e-09	554.769	3.16e-07	1.25905	0.204	NOT	578.269	5.15e-06	1.19197	0.0745	NOT	411.79	1.17e-11	1.32234	0.484	NOT	0.986824	0.36	NOT	0.779586	0.149	NOT	1.04236	0.35	NOT	0.742273	0.401	NOT
TU0982	1	+	28582932	28585021			AT1G76160.1		535.315	1.19e-19	395.906	3.64e-10	332.752	8.66e-06	521.838	1.47e-10	1.02583	0.264	NOT	399.381	1.4e-10	0.991299	0.115	NOT	366.227	5.53e-06	0.908595	0.0268	NOT	0.739576	0.0285	NOT	0.6216	0.00138	DIFF	0.765335	0.465	NOT	0.701802	0.316	NOT
TU0983	1	+	28591916	28592746			AT1G76180.1		1542.46	3.19e-10	1380.19	1.2e-12	1314.33	3.17e-09	1933.1	1.15e-16	0.79792	0.148	NOT	1584.31	1.02e-15	0.871162	0.268	NOT	1083.08	3.58e-12	1.21351	0.386	NOT	0.894798	0.329	NOT	0.8521	0.335	NOT	0.81957	0.467	NOT	0.560281	0.12	NOT
TU0984	1	+	28691213	28691433			AT1G76460.1		1224.86	7.12e-12	2409.96	8.45e-11	2358.57	1.73e-09	1958.34	7.15e-12	0.625458	0.229	NOT	2685.01	3.33e-14	0.897561	0.163	NOT	3223.7	9.9e-15	0.731634	0.0199	NOT	1.96754	0.159	NOT	1.92558	0.323	NOT	1.37106	0.141	NOT	1.64614	0.0231	DIFF
TU0985	1	-	28700683	28703611			AT1G76490.1		1231.81	6.03e-20	999.969	2.47e-13	919.213	6.68e-12	1480.68	3.1e-19	0.831922	0.0876	NOT	852.889	4.3e-16	1.17245	0.413	NOT	721.23	4.93e-13	1.27451	0.34	NOT	0.811788	0.252	NOT	0.74623	0.0953	NOT	0.576012	0.025	DIFF	0.487094	0.000979	DIFF
TU0986	1	+	28739470	28740200	AT1G76580	AT1G76580			526.037	3.31e-09	614.667	6.07e-07	436.443	3.47e-07	421.056	1.57e-08	1.24933	0.191	NOT	409.529	9.03e-06	1.50091	0.183	NOT	474.192	1.56e-10	0.920393	0.463	NOT	1.16849	0.467	NOT	0.829681	0.445	NOT	0.972624	0.487	NOT	1.1262	0.174	NOT
TU0987	1	-	28781878	28783158			AT1G76680.1		354.771	5.41e-06	398.965	1.71e-10	258.893	0.00269882	516.056	2.05e-08	0.687466	0.0423	NOT	506.931	2.99e-09	0.78702	0.256	NOT	230.335	0.0008515	1.12398	0.497	NOT	1.12457	0.323	NOT	0.729747	0.138	NOT	0.982318	0.296	NOT	0.446337	0.00373	DIFF
TU0988	1	+	28794674	28795677			AT1G76710.1		346.297	4.27e-07	304.093	4.02e-09	350.964	5.56e-09	416.576	5.97e-11	0.831294	0.084	NOT	384.74	1.08e-17	0.790386	0.0799	NOT	412.655	7.91e-13	0.850502	0.256	NOT	0.878128	0.485	NOT	1.01348	0.306	NOT	0.923577	0.493	NOT	0.990588	0.368	NOT
TU0989	1	-	28821154	28821978			AT1G76780.1		265.818	3.74e-07	346.897	0.000135166	331.093	2.87e-05	348.973	1.27e-06	0.761715	0.355	NOT	448.626	8.2e-12	0.773243	0.219	NOT	453.478	1.11e-07	0.730119	0.339	NOT	1.30502	0.308	NOT	1.24556	0.365	NOT	1.28556	0.116	NOT	1.29946	0.371	NOT
TU0990	1	+	28827372	28827558			AT1G76790.1		1331.35	5.49e-10	413.668	0.0172781	559.877	0.0867969	2399.09	1.29e-09	0.55494	0.0465	NOT	645.781	4.46e-06	0.64057	0.286	NOT	1166.65	1.14e-06	0.479901	0.0568	NOT	0.310713	3.07e-05	DIFF	0.420533	0.0119	DIFF	0.269177	0.000415	DIFF	0.486289	0.0119	DIFF
TU0991	1	+	28836160	28836526			AT1G76810.1		715.689	8.31e-07	578.589	3.91e-05	520.878	7.07e-06	837.503	4.16e-11	0.854551	0.153	NOT	501.762	1.6e-08	1.15311	0.202	NOT	508.474	7.54e-08	1.02439	0.312	NOT	0.808436	0.342	NOT	0.727799	0.13	NOT	0.599117	0.00818	DIFF	0.607131	0.0373	DIFF
TU0992	1	+	28838636	28841557			AT1G76810.1		367.572	3.05e-07	374.903	1.02e-11	357.957	1.74e-06	479.722	2.91e-11	0.766219	0.122	NOT	347.969	9.7e-10	1.0774	0.217	NOT	381.247	3.42e-09	0.938911	0.0871	NOT	1.01994	0.352	NOT	0.973842	0.187	NOT	0.725356	0.0631	NOT	0.794725	0.228	NOT
TU0993	1	-	28862222	28863250			AT1G76870.1		1062.29	1.15e-14	874.965	1.95e-11	1013.84	2.95e-15	872.063	3.76e-08	1.21813	0.404	NOT	1085.34	1.47e-16	0.806167	0.122	NOT	522.53	1.39e-08	1.94025	0.148	NOT	0.823659	0.345	NOT	0.954391	0.365	NOT	1.24457	0.168	NOT	0.599188	0.098	NOT
TU0994	1	+	28894242	28895279					5295.24	4.23e-40	4694.59	2.94e-37	12125	6.27e-64	2967.64	1.05e-31	1.78433	0.0122	NOT	2824.58	5.38e-35	1.66205	0.0678	NOT	7950.62	6.51e-51	1.52504	0.0123	NOT	0.886568	0.289	NOT	2.28979	9.12e-07	DIFF	0.951793	0.401	NOT	2.67911	3.06e-07	DIFF
TU0995	1	-	28938950	28942120					740.69	9.91e-13	926.866	3.39e-17	1219.33	9.07e-18	1287.31	7.67e-17	0.575378	0.0409	NOT	1434.44	4.58e-15	0.646152	0.27	NOT	1761.69	8.28e-19	0.692137	0.196	NOT	1.25135	0.239	NOT	1.64621	0.0345	DIFF	1.11429	0.412	NOT	1.3685	0.168	NOT
TU0996	1	+	28952750	28953294			AT1G77030.1		8726.63	3.68e-17	8090.22	6.75e-16	5822.19	6.89e-16	9000.29	2.56e-10	0.969594	0.245	NOT	7149.13	3.91e-12	1.13164	0.346	NOT	8336.88	2.2e-14	0.698366	0.233	NOT	0.927073	0.366	NOT	0.667175	0.185	NOT	0.794322	0.416	NOT	0.92629	0.441	NOT
TU0997	1	+	28965222	28965886			AT1G77090.1		696.5	2.57e-11	668.189	1.93e-06	687.425	9.47e-09	500.669	9.84e-06	1.39114	0.445	NOT	674.423	2.59e-16	0.990757	0.21	NOT	516.87	0.000930805	1.32998	0.162	NOT	0.959352	0.292	NOT	0.986971	0.413	NOT	1.34704	0.341	NOT	1.03236	0.149	NOT
TU0998	1	+	29003037	29007182			AT1G77170.1,AT1G77180.1		286.89	3.41e-11	390.833	3.36e-15	282.402	3.82e-14	307.04	7.09e-12	0.934373	0.452	NOT	348.994	4e-16	1.11988	0.249	NOT	305.117	2.74e-10	0.925553	0.361	NOT	1.36231	0.486	NOT	0.984356	0.187	NOT	1.13664	0.291	NOT	0.993737	0.268	NOT
TU0999	1	+	29022916	29026168	AT1G77230	AT1G77230	AT1G77240.1		898.192	1.45e-16	1278.97	2.26e-36	1657.58	1.48e-35	716.72	2.08e-23	1.2532	0.274	NOT	778.245	2.02e-14	1.6434	0.000648	DIFF	1264.32	3.77e-37	1.31104	0.0517	NOT	1.42394	0.00438	DIFF	1.84546	5.38e-05	DIFF	1.08584	0.442	NOT	1.76404	0.000631	DIFF
TU1000	1	-	29133477	29134409			AT1G77510.1		779.793	0.0274175	1206.11	2.98e-09	1766.58	2.26e-06	1033.38	2.36e-12	0.754604	0.0696	NOT	1379.11	9.73e-06	0.874557	0.45	NOT	1774.69	5.17e-07	0.99543	0.348	NOT	1.54671	0.0688	NOT	2.26545	0.00488	DIFF	1.33456	0.41	NOT	1.71736	0.0496	DIFF
TU1001	1	+	29149139	29151155			AT1G77580.1		446.64	6.81e-11	477.503	7.8e-15	374.774	2.3e-08	420.817	5.99e-07	1.06136	0.313	NOT	255.169	7.33e-06	1.87132	0.0648	NOT	387.285	5.37e-08	0.967696	0.269	NOT	1.0691	0.492	NOT	0.839096	0.218	NOT	0.606366	0.154	NOT	0.920317	0.371	NOT
TU1002	1	+	29152842	29154046			AT1G77590.1		285.077	0.000114455	450.24	5.02e-11	234.102	0.000144772	315.563	2.1e-05	0.903392	0.342	NOT	326.658	0.000623122	1.37832	0.035	NOT	228.974	0.000402907	1.0224	0.235	NOT	1.57936	0.0348	NOT	0.821189	0.0416	NOT	1.03516	0.267	NOT	0.725605	0.106	NOT
TU1003	1	-	29156675	29157233	AT1G77590	AT1G77590			2602.39	1.52e-18	2446.07	7.13e-19	2726.74	2.62e-17	1795.86	2.12e-17	1.44911	0.318	NOT	2199.09	3.14e-18	1.11231	0.374	NOT	1648.85	1.03e-15	1.65372	0.124	NOT	0.939932	0.192	NOT	1.04778	0.386	NOT	1.22453	0.492	NOT	0.918139	0.325	NOT
TU1004	1	+	29177560	29178320			AT1G77620.1		504.942	2.96e-15	689.638	1.99e-18	447.06	5.75e-17	412.365	5.39e-14	1.2245	0.28	NOT	296.419	3.14e-12	2.32656	0.0537	NOT	509.218	6.38e-18	0.877934	0.199	NOT	1.36578	0.0814	NOT	0.885369	0.0743	NOT	0.718827	0.288	NOT	1.23487	0.468	NOT
TU1005	1	-	29216649	29217346			AT1G77720.1		282.364	0.000567448	491.017	1.05e-07	426.062	6.2e-06	408.93	0.000337111	0.690495	0.144	NOT	449.81	0.000415353	1.09161	0.455	NOT	510.184	6.86e-09	0.835114	0.329	NOT	1.73895	0.192	NOT	1.50891	0.212	NOT	1.09997	0.359	NOT	1.24761	0.407	NOT
TU1006	1	-	29225267	29227196			AT1G77740.1		517.183	1.24e-12	422.587	9.59e-14	381.56	1.1e-12	395.6	9.75e-17	1.30734	0.471	NOT	309.6	1.77e-07	1.36495	0.109	NOT	317.427	7.62e-06	1.20204	0.142	NOT	0.817094	0.333	NOT	0.737766	0.22	NOT	0.782609	0.0657	NOT	0.802394	0.0506	DIFF
TU1007	1	+	29240810	29244471			AT1G77760.1		529.613	4.41e-13	352.734	1.55e-05	304.136	0.000185408	511.909	3.38e-09	1.03458	0.205	NOT	386.668	1.99e-06	0.91224	0.218	NOT	319.988	8.71e-06	0.950461	0.179	NOT	0.666022	0.0101	DIFF	0.574261	0.000834	DIFF	0.755345	0.162	NOT	0.625088	0.067	DIFF
TU1008	1	-	29273751	29275328			AT1G77840.1		663.969	7.68e-17	542.387	1.82e-10	466.577	1.05e-14	768.912	9.39e-14	0.863518	0.374	NOT	736.705	1.84e-17	0.736234	0.02	NOT	674.822	3.27e-16	0.691408	0.0943	NOT	0.816886	0.0456	NOT	0.702709	0.061	NOT	0.958114	0.437	NOT	0.877632	0.39	NOT
TU1009	1	-	29343545	29344011			AT1G78020.1		758.803	1.01e-10	412.199	0.000136761	327.572	0.00025923	589.921	7.91e-12	1.28628	0.367	NOT	489.171	3.06e-09	0.842648	0.371	NOT	405.273	0.000125158	0.808275	0.241	NOT	0.543223	0.0752	NOT	0.431696	0.0627	NOT	0.829214	0.238	NOT	0.686995	0.174	NOT
TU1010	1	-	29349445	29350090					314.051	0.00132549	305.947	0.000342895	644.492	5.57e-17	311.105	0.000204773	1.00947	0.476	NOT	549.027	0.00087754	0.557253	0.382	NOT	410.273	2.09e-05	1.57089	0.0472	NOT	0.974195	0.348	NOT	2.05219	0.0227	DIFF	1.76476	0.158	NOT	1.31876	0.488	NOT
TU1011	1	-	29351360	29351997			AT1G78040.1		1375.1	5.17e-08	824.246	1.62e-07	466.482	0.000235714	1568.5	4.73e-13	0.876697	0.187	NOT	928.378	1.16e-08	0.887834	0.332	NOT	721.251	3.73e-07	0.646768	0.0447	NOT	0.599408	0.138	NOT	0.339235	0.00227	DIFF	0.591889	0.0822	NOT	0.459835	0.0145	DIFF
TU1012	1	-	29378631	29379139			AT1G78090.1		313.73	0.00206351	228.188	0.141523	265.962	0.00674993	391.653	1.14e-10	0.801041	0.135	NOT	250.759	0.00130977	0.909989	0.283	NOT	201.761	0.0531395	1.3182	0.477	NOT	0.727339	0.0305	NOT	0.847742	0.0672	NOT	0.640258	0.00969	DIFF	0.515152	0.00584	DIFF
TU1013	1	-	29410470	29411328			AT1G78150.1		712.503	2.25e-09	810.795	7.66e-13	562.696	7.77e-05	962.368	4.76e-11	0.740364	0.286	NOT	1011.01	1.13e-08	0.801965	0.388	NOT	601.177	9.89e-09	0.935991	0.26	NOT	1.13795	0.497	NOT	0.789745	0.161	NOT	1.05054	0.435	NOT	0.624685	0.152	NOT
TU1014	1	-	29418970	29420840			AT1G78170.1,AT1G78172.1		521.511	4.03e-07	364.83	5.78e-07	241.793	0.000732141	613.284	2.26e-10	0.850358	0.0874	NOT	339.538	0.00077799	1.07449	0.242	NOT	332.046	0.000449262	0.728191	0.0828	NOT	0.699563	0.215	NOT	0.463639	0.0163	DIFF	0.553639	0.00127	DIFF	0.541423	0.00631	DIFF
TU1015	1	+	29438024	29438821			AT1G78240.1		478.864	4.52e-07	376.283	0.000179945	267.576	0.00754434	363.827	1.24e-07	1.31619	0.437	NOT	286.214	0.00542155	1.31469	0.267	NOT	493.229	5.37e-13	0.542499	0.00561	NOT	0.785783	0.282	NOT	0.558772	0.0653	NOT	0.786676	0.126	NOT	1.35567	0.148	NOT
TU1016	1	-	29466470	29468242			AT1G78300.1		557.843	2.01e-12	338.862	4.9e-08	267.359	9.72e-07	507.27	6.68e-11	1.0997	0.142	NOT	313.914	7.17e-09	1.07947	0.213	NOT	267.017	1.67e-05	1.00128	0.496	NOT	0.60745	0.0961	NOT	0.479273	0.0708	NOT	0.61883	0.0522	NOT	0.52638	0.00294	DIFF
TU1017	1	+	29468779	29469882			AT1G78310.1		306.907	1.31e-07	301.655	3.98e-05	310.864	0.000117226	290.493	0.000449145	1.0565	0.151	NOT	524.509	1.7e-11	0.575119	0.035	NOT	296.281	0.00021176	1.04922	0.441	NOT	0.982887	0.22	NOT	1.01289	0.0993	NOT	1.80558	0.0218	DIFF	1.01992	0.497	NOT
TU1018	1	-	29482461	29483087			AT1G78350.1		1057.44	2.24e-06	720.721	0.000172035	995.589	4.53e-07	1184.23	1.26e-06	0.892935	0.454	NOT	890.908	5.1e-09	0.808974	0.201	NOT	1160.58	1.84e-06	0.857837	0.401	NOT	0.681572	0.405	NOT	0.941509	0.5	NOT	0.75231	0.455	NOT	0.980029	0.364	NOT
TU1019	1	+	29489150	29490206			AT1G78370.1		729.087	1.72e-16	389.364	2.92e-08	263.613	0.000217937	683.722	3.24e-10	1.06635	0.185	NOT	510.599	7.25e-07	0.762563	0.101	NOT	432.966	4.57e-06	0.608854	0.0717	NOT	0.534043	0.00107	DIFF	0.361566	5.58e-05	DIFF	0.746793	0.175	NOT	0.633249	0.056	DIFF
TU1020	1	+	29491343	29493256			AT1G78380.1		2139.17	1.04e-11	2857.29	4.48e-20	1614.25	2.87e-11	2500.49	2.44e-15	0.8555	0.272	NOT	2812.03	7.96e-21	1.0161	0.298	NOT	1918.9	1.13e-11	0.841237	0.26	NOT	1.3357	0.235	NOT	0.754615	0.0975	NOT	1.12459	0.343	NOT	0.76741	0.121	NOT
TU1021	1	-	29511736	29512131			AT1G78420.1		570.15	1.99e-09	671.022	4.98e-09	1095.58	3.35e-06	769.128	2.7e-05	0.741294	0.286	NOT	592.292	1.06e-07	1.13292	0.0541	NOT	670.008	5.97e-06	1.63517	0.369	NOT	1.17692	0.326	NOT	1.92156	0.398	NOT	0.770082	0.306	NOT	0.871127	0.445	NOT
TU1022	1	-	29514736	29515570			AT1G78430.1		544.983	2.02e-13	396.436	3.07e-06	497.647	5.16e-08	430.148	8.56e-06	1.26697	0.321	NOT	727.958	2.43e-07	0.544586	0.126	NOT	493.963	4.94e-08	1.00746	0.321	NOT	0.727428	0.423	NOT	0.913142	0.477	NOT	1.69234	0.0881	NOT	1.14836	0.449	NOT
TU1023	1	+	29521592	29524203			AT1G78460.1		760.662	8.73e-10	915.029	3.11e-17	884.276	1.36e-24	905.458	1.04e-19	0.840085	0.19	NOT	718.052	1.16e-10	1.27432	0.164	NOT	954.628	7.26e-22	0.926304	0.241	NOT	1.20294	0.0787	NOT	1.16251	0.141	NOT	0.793026	0.257	NOT	1.0543	0.184	NOT
TU1024	1	+	29530191	29531140	AT1G78476	AT1G78476	AT1G78480.1		1118.39	6.21e-25	679.987	2.85e-23	514.708	2.92e-16	1047.29	8.96e-28	1.06789	0.175	NOT	435.735	1.08e-19	1.56055	0.0152	NOT	354.648	3.62e-14	1.45132	0.143	NOT	0.608005	0.00687	DIFF	0.460222	0.000515	DIFF	0.41606	9.61e-05	DIFF	0.338634	0.000123	DIFF
TU1025	1	+	29540139	29540759			AT1G78510.1		2531.89	1.23e-09	2288.09	5.94e-11	1974.89	1.49e-07	2033.48	1.6e-09	1.2451	0.243	NOT	2339.4	5.09e-09	0.978067	0.25	NOT	1721.39	3.65e-07	1.14726	0.485	NOT	0.903708	0.353	NOT	0.780006	0.205	NOT	1.15044	0.453	NOT	0.846524	0.334	NOT
TU1026	1	-	29554517	29557128			AT1G78570.1		558.571	3.66e-14	936.817	2.94e-20	508.271	3.16e-11	531.835	1.23e-12	1.05027	0.464	NOT	613.92	4.39e-15	1.52596	0.131	NOT	392.903	3.14e-16	1.29363	0.439	NOT	1.67717	0.0218	NOT	0.909949	0.201	NOT	1.15434	0.141	NOT	0.738769	0.255	NOT
TU1027	1	-	29581828	29583706			AT1G78630.1		677.318	1.22e-08	1067.4	4.33e-08	524.64	1.39e-06	425.052	4.23e-09	1.59349	0.375	NOT	826.288	2.2e-10	1.2918	0.44	NOT	494.268	8.69e-08	1.06145	0.423	NOT	1.57592	0.211	NOT	0.774584	0.424	NOT	1.94397	0.289	NOT	1.16284	0.455	NOT
TU1028	1	-	29600679	29601045			AT1G78680.1		1099.09	5.62e-09	1148.19	5.43e-08	713.18	4.78e-08	1325.09	7.67e-07	0.829446	0.234	NOT	1189.63	0.000366916	0.965166	0.347	NOT	1338.53	2.05e-07	0.532808	0.255	NOT	1.04467	0.323	NOT	0.648882	0.16	NOT	0.897773	0.202	NOT	1.01014	0.129	NOT
TU1029	1	+	29639130	29641054			AT1G78820.1		606.651	4.43e-13	384.142	2.87e-08	361.296	7.69e-07	570.753	1.75e-10	1.0629	0.383	NOT	464.359	4.19e-12	0.827252	0.326	NOT	294.142	1.58e-10	1.2283	0.328	NOT	0.633217	0.0729	NOT	0.595558	0.0478	NOT	0.81359	0.209	NOT	0.515358	0.0393	DIFF
TU1030	1	+	29642265	29643921			AT1G78830.1		697.932	1.54e-12	806.79	9.74e-24	729.27	1.69e-21	721.319	1.02e-17	0.967577	0.38	NOT	740.342	1.21e-19	1.08975	0.467	NOT	922.9	2.47e-18	0.790194	0.18	NOT	1.15597	0.247	NOT	1.0449	0.287	NOT	1.02637	0.296	NOT	1.27946	0.119	NOT
TU1031	1	+	29646824	29649021			AT1G78850.1		692.923	5.06e-20	379.233	2.7e-10	377.47	6.54e-12	871.308	5.45e-20	0.795268	0.0607	NOT	435.587	5.98e-09	0.870625	0.081	NOT	385.108	2.73e-09	0.980167	0.326	NOT	0.547295	0.0188	NOT	0.54475	0.0178	DIFF	0.499923	0.00985	DIFF	0.441988	0.000408	DIFF
TU1032	1	-	29668712	29670380			AT1G78900.1,AT1G78910.1		842.27	7.6e-09	1014.68	4.82e-14	628.018	2.17e-14	760.513	2.26e-13	1.1075	0.23	NOT	520.326	5.25e-09	1.95009	0.0787	NOT	643.779	1.31e-09	0.975518	0.305	NOT	1.2047	0.418	NOT	0.745626	0.296	NOT	0.684178	0.0135	DIFF	0.846506	0.0211	DIFF
TU1033	1	-	29738468	29739452					497.451	3.81e-14	613.63	9.75e-21	347.613	9.28e-12	600.105	2e-14	0.82894	0.269	NOT	732.092	1.23e-15	0.838187	0.346	NOT	463.967	5.91e-11	0.749219	0.192	NOT	1.23355	0.312	NOT	0.698788	0.183	NOT	1.21994	0.106	NOT	0.773143	0.269	NOT
TU1034	1	-	29740878	29741769			AT1G79040.1		3681.51	9.84e-24	3392.28	9.75e-23	1831.59	1.15e-17	2879.38	4.98e-21	1.27858	0.281	NOT	3209.12	2.59e-25	1.05707	0.449	NOT	1745.85	4.1e-17	1.04911	0.152	NOT	0.921437	0.221	NOT	0.497511	0.00677	DIFF	1.11452	0.383	NOT	0.606328	0.144	NOT
TU1035	1	-	29763449	29766078			AT1G79110.1		412.305	8.04e-09	345.458	5.41e-08	313.512	2.86e-05	424.823	2.47e-08	0.970534	0.292	NOT	394.982	1.37e-05	0.874617	0.346	NOT	363.142	6.73e-05	0.863332	0.25	NOT	0.83787	0.253	NOT	0.760389	0.279	NOT	0.929757	0.395	NOT	0.854808	0.27	NOT
TU1036	1	-	29800341	29800675			AT1G79200.1		575.687	4.42e-08	681.458	3.05e-10	456.335	6.2e-06	552.971	1.37e-06	1.04108	0.489	NOT	406.937	5.88e-06	1.6746	0.0354	NOT	570.645	1.42e-09	0.799683	0.244	NOT	1.18373	0.328	NOT	0.792679	0.302	NOT	0.73591	0.121	NOT	1.03196	0.458	NOT
TU1037	1	-	29808185	29814357			AT1G79230.1,AT1G79240.1		2466.84	1.93e-60	16896.4	2.76e-86	10525.1	1.52e-78	2267.06	1.2e-58	1.08812	0.185	NOT	11004.6	1.26e-86	1.53539	5.32e-07	DIFF	12469.3	6.75e-84	0.844081	0.0249	NOT	6.84941	0	DIFF	4.26663	0	DIFF	4.85413	0	DIFF	5.50021	0	DIFF
TU1038	1	-	29847637	29849400			AT1G79340.1		875.968	2.03e-12	577.476	1.79e-11	407.637	4.04e-07	1078.16	6.38e-16	0.812466	0.0717	NOT	980.953	1.08e-12	0.588689	0.144	NOT	659.201	6.85e-12	0.61838	0.0588	NOT	0.659243	0.405	NOT	0.465356	0.106	NOT	0.90984	0.206	NOT	0.611413	0.0596	DIFF
TU1039	1	-	29915932	29916718					702.902	1.04e-10	1578.74	2.67e-17	3286.54	4.01e-25	437.09	4.03e-05	1.60814	0.00922	NOT	966.801	2.41e-07	1.63295	0.0405	NOT	3937.16	7.34e-31	0.834749	0.415	NOT	2.24603	0.0108	DIFF	4.67567	1.51e-05	DIFF	2.2119	0.0121	DIFF	9.00766	1e-08	DIFF
TU1040	1	+	29928995	29930696			AT1G79550.1		503.538	4.41e-13	627.034	2.68e-14	706.123	5.42e-09	545.842	6.83e-09	0.922498	0.436	NOT	1030.07	1e-13	0.60873	0.0269	NOT	762.131	2e-11	0.926511	0.0832	NOT	1.24526	0.478	NOT	1.40232	0.248	NOT	1.88712	0.0153	DIFF	1.39625	0.183	NOT
TU1041	1	+	29985462	29986167			AT1G79680.1		543.26	1.25e-09	413.818	0.00228145	328.954	1.33e-06	495.579	0.000141055	1.09621	0.269	NOT	273.054	0.00759369	1.51552	0.115	NOT	368.109	7.63e-06	0.893632	0.446	NOT	0.761731	0.136	NOT	0.605519	0.073	NOT	0.55098	0.0627	NOT	0.742786	0.142	NOT
TU1042	1	-	30011128	30011731	AT1G79740	AT1G79740			2253.3	1.02e-25	1816.12	1.51e-10	2468.67	5.5e-14	2281.83	7.84e-23	0.987497	0.296	NOT	1407.05	2.49e-12	1.29073	0.363	NOT	1621.19	8.12e-23	1.52275	0.247	NOT	0.805982	0.248	NOT	1.09558	0.258	NOT	0.616632	0.275	NOT	0.710478	0.254	NOT
TU1043	1	-	30016576	30019685			AT1G79770.1		2553.77	2.76e-12	2502.22	8.57e-12	2700.43	8.95e-10	2385.12	1.17e-09	1.07071	0.272	NOT	1647.93	1.39e-09	1.5184	0.161	NOT	1760.49	1.1e-11	1.53391	0.445	NOT	0.979814	0.428	NOT	1.05743	0.248	NOT	0.690921	0.266	NOT	0.738114	0.452	NOT
TU1044	1	-	30020660	30021069			AT1G79780.1		1156.88	1.47e-08	1021.48	2.46e-09	1128.48	2.9e-07	1047.16	2.89e-06	1.10478	0.312	NOT	1260.23	1.4e-12	0.81055	0.42	NOT	941.544	6.45e-09	1.19854	0.387	NOT	0.882961	0.496	NOT	0.975451	0.41	NOT	1.20347	0.267	NOT	0.899141	0.474	NOT
TU1045	1	+	30046048	30049216			AT1G79850.1,AT1G79860.1		412.111	1.36e-17	347.612	3.65e-10	390.361	1.1e-13	375.427	5.32e-13	1.09771	0.484	NOT	322.387	1.69e-09	1.07824	0.394	NOT	368.599	3.01e-12	1.05904	0.312	NOT	0.843491	0.266	NOT	0.947223	0.39	NOT	0.858721	0.172	NOT	0.981813	0.226	NOT
TU1046	1	+	30063808	30071936			AT1G79920.1,AT1G79930.1		249.408	2.91e-08	294.913	4.83e-10	292.702	2.62e-13	275.745	3.44e-07	0.904488	0.162	NOT	410.203	2.4e-14	0.718944	0.0585	NOT	256.936	1.67e-09	1.1392	0.141	NOT	1.18245	0.0428	NOT	1.17359	0.119	NOT	1.48762	0.0099	DIFF	0.931788	0.188	NOT
TU1047	1	+	30084487	30085603			AT1G79960.1		418.642	1.03e-08	987.676	1.97e-20	809.302	7.73e-15	756.143	1.48e-12	0.553655	0.0121	NOT	1004.02	3.47e-16	0.983721	0.3	NOT	1192.8	1.51e-21	0.678489	0.0711	NOT	2.35924	0.000195	DIFF	1.93316	0.00634	DIFF	1.32782	0.198	NOT	1.57748	0.0284	DIFF
TU1048	1	-	30108939	30109401					2564.46	1.69e-13	2507.11	1.63e-10	3156.34	2.61e-15	2455.21	1.86e-10	1.0445	0.331	NOT	2420.75	9.94e-09	1.03567	0.27	NOT	2860.31	3.82e-09	1.1035	0.226	NOT	0.977637	0.444	NOT	1.2308	0.238	NOT	0.985965	0.262	NOT	1.165	0.5	NOT
TU1049	1	+	30113429	30116094			AT1G80030.1,AT1G80040.1		341.937	8.41e-09	279.449	4.83e-06	309.636	8.88e-07	334.17	1.36e-07	1.02324	0.406	NOT	379.089	7.37e-12	0.737159	0.0652	NOT	356.137	9.34e-12	0.869429	0.397	NOT	0.817253	0.128	NOT	0.905535	0.426	NOT	1.13442	0.432	NOT	1.06574	0.379	NOT
TU1050	1	-	30143941	30144731			AT1G80120.1		7774.74	1.59e-09	6509.18	1.91e-08	6599.39	1.08e-08	4061.53	1.01e-08	1.91424	0.248	NOT	9057.79	1.67e-12	0.718628	0.154	NOT	7768.74	2.39e-08	0.84948	0.435	NOT	0.837222	0.43	NOT	0.848825	0.465	NOT	2.23014	0.0852	NOT	1.91276	0.202	NOT
TU1051	1	+	30146181	30147389			AT1G80130.1		332.971	0.000315828	376.484	6.07e-07	429.271	0.000340011	412.745	3.24e-10	0.806723	0.0773	NOT	304.513	0.00219687	1.23635	0.071	NOT	382.359	6.1e-06	1.12269	0.439	NOT	1.13068	0.312	NOT	1.28921	0.356	NOT	0.737775	0.0108	DIFF	0.926381	0.212	NOT
TU1052	1	+	30161890	30162552			AT1G80180.1		1218.62	1.92e-14	995.638	3.6e-10	863.992	2.65e-09	1349.71	2.62e-13	0.902875	0.377	NOT	1237.3	1.63e-13	0.804686	0.254	NOT	1262.02	2.1e-16	0.68461	0.111	NOT	0.817021	0.18	NOT	0.708992	0.0876	NOT	0.916715	0.279	NOT	0.93503	0.341	NOT
TU1053	1	+	30213700	30214205			AT1G80360.1		765.083	1.54e-06	795.171	2.57e-10	513.422	1.78e-05	537.165	0.000193747	1.4243	0.476	NOT	593.145	4.44e-06	1.3406	0.189	NOT	601.85	3.5e-07	0.853073	0.181	NOT	1.03933	0.184	NOT	0.671067	0.32	NOT	1.10421	0.483	NOT	1.12042	0.362	NOT
TU1054	1	+	30232557	30234770			AT1G80410.1		369.798	7.56e-12	337.131	1.58e-15	306.056	8.09e-10	486.416	7.46e-17	0.76025	0.0272	NOT	466.265	1.64e-14	0.723046	0.077	NOT	385.27	2.78e-14	0.794394	0.22	NOT	0.911663	0.314	NOT	0.82763	0.446	NOT	0.958572	0.441	NOT	0.792059	0.0884	NOT
TU1055	1	-	30246408	30248408			AT1G80440.1		424.761	1.54e-15	636.839	1.37e-16	502.692	5.16e-12	462.984	9.2e-12	0.917442	0.354	NOT	615.797	1.85e-13	1.03417	0.311	NOT	409.782	8.11e-10	1.22673	0.492	NOT	1.49929	0.387	NOT	1.18347	0.256	NOT	1.33006	0.466	NOT	0.885089	0.152	NOT
TU1056	1	+	30290252	30290895			AT1G80550.1		1392.07	1.71e-09	624.307	2.23e-05	880.53	3.72e-10	816.265	1.78e-06	1.70541	0.238	NOT	963.495	4.15e-13	0.647961	0.203	NOT	313.765	4.43e-06	2.80634	0.261	NOT	0.448474	0.0581	NOT	0.632533	0.105	NOT	1.18037	0.319	NOT	0.384391	0.0611	DIFF
TU1057	1	+	30303240	30304291			AT1G80600.1		869.582	6.49e-07	959.612	1.69e-12	877.971	1.7e-12	1155.17	2.58e-13	0.752774	0.0497	NOT	807.268	2.91e-17	1.18872	0.479	NOT	705.793	3.28e-11	1.24395	0.418	NOT	1.10353	0.371	NOT	1.00965	0.495	NOT	0.69883	0.0872	NOT	0.610986	0.0493	DIFF
TU1058	1	-	30362529	30364389			AT1G80770.1,AT1G80780.1		542.557	2.13e-11	442.859	4.98e-09	354.864	7.43e-09	428.163	7.31e-06	1.26717	0.241	NOT	600.562	1.2e-11	0.737408	0.296	NOT	332.175	4.15e-05	1.0683	0.356	NOT	0.816244	0.424	NOT	0.654058	0.0444	NOT	1.40265	0.142	NOT	0.775814	0.248	NOT
TU1059	1	+	30390480	30390947			AT1G80850.1		891.603	1.58e-09	566.116	2.77e-11	575.774	1.28e-07	681.189	4.86e-11	1.30889	0.322	NOT	390.053	9.06e-06	1.45138	0.0659	NOT	296.849	3.74e-05	1.93962	0.243	NOT	0.634942	0.177	NOT	0.645774	0.142	NOT	0.572606	0.028	DIFF	0.435781	0.022	DIFF
TU1060	1	-	30398041	30399141			AT1G80870.1		460.755	5.2e-13	539.988	9.02e-08	424.418	7.72e-10	691.595	6.01e-13	0.666221	0.0997	NOT	545.628	1.57e-10	0.989663	0.168	NOT	534.85	1.31e-15	0.793527	0.388	NOT	1.17196	0.475	NOT	0.921136	0.285	NOT	0.788942	0.0235	DIFF	0.773357	0.202	NOT
TU1061	1	+	30413243	30414398			AT1G80930.1		1553.3	6.88e-15	1533.5	1.72e-15	1565.08	2.25e-18	1370.14	7.08e-14	1.13368	0.326	NOT	1302.5	8.67e-12	1.17735	0.209	NOT	1608.13	2.16e-13	0.97323	0.142	NOT	0.987253	0.498	NOT	1.00758	0.454	NOT	0.950633	0.348	NOT	1.1737	0.226	NOT
TU1062	1	-	30415658	30417369			AT1G80940.1		631.943	4.52e-15	439.373	2.5e-14	422.38	1.01e-05	712.261	2.66e-14	0.887235	0.44	NOT	590.919	4.38e-16	0.743542	0.176	NOT	453.005	6.45e-09	0.932396	0.408	NOT	0.695273	0.235	NOT	0.668383	0.11	NOT	0.829638	0.394	NOT	0.63601	0.0802	NOT
TU1063	1	+	30417529	30417909			AT1G80950.1		424.578	0.00357445	490.138	0.00239535	464.426	3.45e-06	460.701	3.06e-09	0.921591	0.162	NOT	262.282	0.00756807	1.86874	0.0369	NOT	556.661	6.56e-11	0.834307	0.274	NOT	1.15441	0.263	NOT	1.09385	0.335	NOT	0.569311	0.0177	DIFF	1.20829	0.426	NOT
TU1064	2	-	77466	78712			AT2G01080.1		343.716	3.68e-05	388.121	3.53e-11	461.496	3.51e-11	328.3	1.46e-09	1.04696	0.5	NOT	528.638	4.31e-10	0.734191	0.252	NOT	250.317	0.00259323	1.84365	0.0406	NOT	1.12919	0.291	NOT	1.34267	0.0681	NOT	1.61023	0.12	NOT	0.762464	0.334	NOT
TU1065	2	+	85673	86988	AT2G01120	AT2G01120			683.665	5.64e-12	374.462	2.12e-08	604.739	1.33e-11	483.94	3.11e-06	1.41271	0.129	NOT	292.398	0.00296026	1.28066	0.255	NOT	507.938	0.00214377	1.19058	0.343	NOT	0.547727	0.0408	NOT	0.884555	0.0803	NOT	0.604203	0.106	NOT	1.04959	0.21	NOT
TU1066	2	-	114975	118533			AT2G01190.1,AT2G01200.1		310.399	1.41e-11	234.313	0.000106744	272.195	2.35e-08	249.814	4.04e-07	1.24252	0.215	NOT	299.437	4.92e-07	0.782512	0.0292	NOT	249.254	8.91e-08	1.09204	0.217	NOT	0.754877	0.0596	NOT	0.87692	0.293	NOT	1.19864	0.123	NOT	0.997758	0.262	NOT
TU1067	2	+	154023	155005			AT2G01320.1		410.38	1.13e-08	455.877	4.02e-06	258.773	0.00114235	533.492	1.04e-12	0.769234	0.188	NOT	290.585	0.000679146	1.56882	0.279	NOT	417.929	7.36e-12	0.619179	0.0168	NOT	1.11087	0.358	NOT	0.630569	0.0322	DIFF	0.544685	0.0197	DIFF	0.783384	0.292	NOT
TU1068	2	-	172231	174082			AT2G01390.1		174.405	0.0384652	482.122	1.11e-21	190.402	0.0193157	155.742	0.0913559	1.11983	0.46	NOT	993.19	9.08e-21	0.485428	0.00236	DIFF	289.785	1.52e-05	0.657046	0.056	NOT	2.76438	4.09e-08	DIFF	1.09172	0.292	NOT	6.37715	8.24e-13	DIFF	1.86067	0.0111	DIFF
TU1069	2	+	180247	180533			AT2G01420.1		2086.85	1.84e-10	1006.82	1.58e-06	514.986	7e-08	2271.29	7.46e-12	0.918795	0.354	NOT	905.648	0.000485749	1.11171	0.345	NOT	946.509	0.000726033	0.54409	0.211	NOT	0.482459	0.07	NOT	0.246777	0.0137	DIFF	0.398737	0.00264	DIFF	0.416727	0.00786	DIFF
TU1070	2	+	182022	183393			AT2G01420.1		351.3	7.77e-15	282.328	1.16e-08	217.823	0.0416813	373.652	4.01e-07	0.94018	0.0613	NOT	270.761	6.71e-06	1.04272	0.148	NOT	268.289	4.39e-07	0.811897	0.118	NOT	0.803666	0.0392	NOT	0.620048	0.000171	DIFF	0.724634	0.139	NOT	0.718018	0.208	NOT
TU1071	2	+	194090	194854			AT2G01440.1		243.107	0.000649504	291.472	1.09e-06	233.629	0.00756751	264.181	1.41e-05	0.920229	0.21	NOT	465.829	4.86e-11	0.625706	0.11	NOT	250.755	1.46e-05	0.931702	0.342	NOT	1.19895	0.151	NOT	0.961013	0.491	NOT	1.76329	0.0645	NOT	0.949179	0.343	NOT
TU1072	2	-	238671	240475			AT2G01530.1		901.699	3.82e-13	732.04	5.09e-06	528.492	3.67e-05	1108.77	4.87e-24	0.813243	0.0501	NOT	986.073	1.1e-15	0.742379	0.185	NOT	543.973	1.59e-06	0.971541	0.27	NOT	0.811845	0.339	NOT	0.586107	0.158	NOT	0.88934	0.143	NOT	0.490609	0.00285	DIFF
TU1073	2	+	244018	245115			AT2G01550.1		534.013	1.42e-06	1068.33	2.77e-12	902.358	1.13e-05	497.262	3.16e-05	1.07391	0.5	NOT	754.416	3.64e-05	1.4161	0.065	NOT	592.282	9.58e-11	1.52353	0.455	NOT	2.00057	0.0346	NOT	1.68977	0.268	NOT	1.51714	0.361	NOT	1.19109	0.114	NOT
TU1074	2	+	255451	257452			AT2G01570.1		467.154	1.42e-11	481.38	9.35e-13	352.772	2.2e-08	581.353	2.45e-16	0.803563	0.158	NOT	391.292	2.4e-08	1.23023	0.338	NOT	310.421	7.66e-08	1.13643	0.489	NOT	1.03045	0.268	NOT	0.755151	0.0233	DIFF	0.673071	0.0182	DIFF	0.533963	0.000653	DIFF
TU1075	2	-	268754	270181			AT2G01600.1		357.722	2.99e-08	721.341	2.25e-12	616.87	1.99e-09	552.606	7.49e-09	0.647336	0.193	NOT	390.303	6.15e-06	1.84816	0.0151	NOT	679.951	6.11e-11	0.907227	0.14	NOT	2.01648	0.062	NOT	1.72444	0.311	NOT	0.706295	0.049	NOT	1.23044	0.227	NOT
TU1076	2	+	279452	281270			AT2G01630.1		684.19	8.08e-20	444.152	1.29e-18	437.401	6.47e-15	560.514	2.2e-17	1.22065	0.136	NOT	474.505	5.79e-20	0.936032	0.169	NOT	419.454	1.74e-22	1.04279	0.363	NOT	0.649165	0.00813	DIFF	0.639298	0.00952	DIFF	0.846553	0.315	NOT	0.748338	0.0468	DIFF
TU1077	2	+	291732	292537			AT2G01660.1		212.323	0.0113607	403.527	1.49e-09	286.329	0.00211635	213.191	0.00213757	0.995929	0.374	NOT	240.997	0.00140028	1.67441	0.0464	NOT	222.881	0.00118783	1.28467	0.497	NOT	1.90053	0.0428	NOT	1.34855	0.377	NOT	1.13043	0.4	NOT	1.04545	0.483	NOT
TU1078	2	+	296504	297068			AT2G01670.1		1194.05	1.59e-21	919.643	5.5e-19	669.571	1.88e-13	1344.75	1.98e-23	0.887935	0.186	NOT	505.908	1.39e-07	1.81781	0.0283	NOT	687.965	2.87e-11	0.973263	0.335	NOT	0.770188	0.452	NOT	0.560756	0.0581	NOT	0.37621	0.000328	DIFF	0.511593	0.00374	DIFF
TU1079	2	-	306562	308424			AT2G01680.1		553.785	2.47e-13	428.908	1.06e-10	432.736	1.26e-09	501.398	1.18e-13	1.10448	0.374	NOT	437.75	1.67e-10	0.979801	0.105	NOT	423.042	2.31e-10	1.02291	0.408	NOT	0.774503	0.332	NOT	0.781415	0.326	NOT	0.873059	0.113	NOT	0.843725	0.371	NOT
TU1080	2	-	315748	316869			AT2G01710.1		438.769	3.27e-09	268.435	0.000847541	417.363	2.43e-09	515.068	3.04e-13	0.851866	0.318	NOT	384.834	3.95e-07	0.697535	0.262	NOT	425.144	1.76e-07	0.981698	0.424	NOT	0.611791	0.078	NOT	0.951214	0.379	NOT	0.747152	0.145	NOT	0.825413	0.195	NOT
TU1081	2	+	332190	332611			AT2G01755.1		1352.68	8.66e-18	1221.18	5.07e-17	1213.55	1.12e-11	999.5	1.49e-12	1.35336	0.423	NOT	1698.9	1.37e-11	0.718806	0.0704	NOT	1718.72	1.57e-13	0.706078	0.306	NOT	0.902786	0.482	NOT	0.897145	0.441	NOT	1.69975	0.262	NOT	1.71958	0.312	NOT
TU1082	2	-	386655	387165			AT2G01850.1		887.848	4.4e-09	1625.16	1.99e-11	779.712	3.73e-09	1382.32	1.72e-08	0.642288	0.202	NOT	1556.3	2.65e-08	1.04425	0.406	NOT	901.849	2.92e-05	0.86457	0.464	NOT	1.83045	0.161	NOT	0.878204	0.332	NOT	1.12586	0.488	NOT	0.652417	0.166	NOT
TU1083	2	-	434140	434949			AT2G01940.1		389.918	3.73e-07	591.413	2.62e-11	394.434	7.29e-08	406.76	6.47e-06	0.958595	0.366	NOT	607.342	1.72e-11	0.973773	0.379	NOT	535.636	9.65e-11	0.736384	0.0963	NOT	1.51676	0.0943	NOT	1.01158	0.291	NOT	1.49312	0.121	NOT	1.31684	0.335	NOT
TU1084	2	-	488955	490339			AT2G02040.1,AT2G02050.1		705.5	7.75e-12	505.486	8.1e-10	424.932	6.38e-08	593.922	1.5e-11	1.18787	0.371	NOT	493.58	3.84e-09	1.02412	0.232	NOT	422.092	5.39e-10	1.00673	0.271	NOT	0.716493	0.411	NOT	0.602313	0.122	NOT	0.831052	0.298	NOT	0.710686	0.411	NOT
TU1085	2	-	505454	506516			AT2G02070.1		1073.38	2.29e-10	1125.75	9.99e-08	1266.01	2.97e-10	1222.17	1.04e-09	0.878258	0.421	NOT	1234.25	2.11e-07	0.912092	0.48	NOT	747.112	1.42e-05	1.69454	0.181	NOT	1.04879	0.344	NOT	1.17946	0.441	NOT	1.00988	0.184	NOT	0.6113	0.0626	DIFF
TU1086	2	-	507938	509258			AT2G02070.1		549.152	4.99e-17	618.45	3.57e-18	470.607	2.15e-13	554.249	7.32e-19	0.990804	0.354	NOT	495.777	9.12e-14	1.24744	0.0604	NOT	452.148	1.92e-10	1.04083	0.345	NOT	1.12619	0.249	NOT	0.85697	0.158	NOT	0.894502	0.345	NOT	0.815785	0.185	NOT
TU1087	2	-	523255	523973			AT2G02090.1		783.517	1.23e-08	645.931	4.42e-10	780.392	8.5e-07	620.895	1.45e-09	1.26192	0.322	NOT	634.605	1.02e-06	1.01785	0.44	NOT	651.294	9.96e-06	1.19822	0.462	NOT	0.824399	0.479	NOT	0.996012	0.221	NOT	1.02208	0.363	NOT	1.04896	0.458	NOT
TU1088	2	-	528325	529169			AT2G02100.1		1443.48	1.02e-12	1273.23	1.27e-08	1478.32	1.35e-10	1665.49	1.39e-12	0.8667	0.215	NOT	1722.79	5.33e-12	0.739051	0.0431	NOT	1984.07	4.99e-12	0.745095	0.11	NOT	0.882056	0.143	NOT	1.02414	0.406	NOT	1.0344	0.431	NOT	1.19128	0.334	NOT
TU1089	2	-	552421	552745		AT2G02150		TU1090	1479.05	1.16e-05	1485.74	5.66e-16	1629.91	3.37e-15	1068.89	3.8e-10	1.38373	0.408	NOT	1594.87	2.89e-06	0.931574	0.452	NOT	2503.97	3.64e-14	0.65093	0.213	NOT	1.00452	0.408	NOT	1.102	0.488	NOT	1.49208	0.344	NOT	2.34259	0.184	NOT
TU1090	2	+	552477	555029			AT2G02160.1	TU1089	524.442	7.74e-14	606.1	1.58e-17	365.76	1.72e-06	684.205	6.61e-19	0.766498	0.0879	NOT	731.545	1.36e-13	0.82852	0.366	NOT	486.002	2.09e-09	0.752589	0.0621	NOT	1.1557	0.229	NOT	0.697427	0.152	NOT	1.06919	0.419	NOT	0.710316	0.171	NOT
TU1091	2	+	590455	590878			AT2G02230.1		672.15	1.18e-07	945.538	1.28e-08	563.111	3.5e-08	530.142	7.18e-09	1.26787	0.252	NOT	1177.25	8.41e-09	0.803175	0.399	NOT	745.255	4.77e-05	0.755595	0.455	NOT	1.40674	0.444	NOT	0.837776	0.263	NOT	2.22063	0.172	NOT	1.40576	0.482	NOT
TU1092	2	-	647704	648336			AT2G02450.1		450.641	2.07e-12	292.506	0.00176954	408.146	3.27e-05	441.453	9.28e-08	1.02081	0.257	NOT	289.689	0.0027793	1.00972	0.218	NOT	391.998	2.22e-05	1.04119	0.436	NOT	0.649089	0.28	NOT	0.905701	0.309	NOT	0.656217	0.234	NOT	0.887972	0.373	NOT
TU1093	2	+	698495	698734			AT2G02570.1		737.02	0.000150269	795.26	0.000107079	710.414	5.32e-09	1064.98	1.39e-05	0.692051	0.102	NOT	578.643	2.63e-06	1.37435	0.252	NOT	720.336	1.92e-06	0.986226	0.481	NOT	1.07902	0.293	NOT	0.963901	0.316	NOT	0.543337	0.0213	DIFF	0.676385	0.114	NOT
TU1094	2	-	802661	803308			AT2G02810.1		522.893	1.89e-09	760.691	2.67e-12	898.7	1.3e-09	459.879	0.000522865	1.13702	0.305	NOT	2069.53	1.16e-12	0.367567	0.0412	NOT	781.219	6.35e-09	1.15038	0.443	NOT	1.45477	0.0469	NOT	1.71871	0.0435	NOT	4.50016	0.000644	DIFF	1.69875	0.017	DIFF
TU1095	2	+	849665	856647			AT2G02950.1		622.352	7.46e-19	450.808	2.54e-11	441.285	1.71e-09	526.253	5.8e-15	1.18261	0.146	NOT	431.765	4.52e-15	1.04411	0.337	NOT	407.911	3.06e-09	1.08182	0.446	NOT	0.724362	0.018	NOT	0.70906	0.00386	DIFF	0.820451	0.0844	NOT	0.775123	0.046	DIFF
TU1096	2	-	939522	940102			AT2G03120.1		1154.43	1.2e-09	1108.13	1.94e-09	722.649	2.82e-07	842.416	3.92e-12	1.37038	0.347	NOT	1542.04	4.49e-15	0.718613	0.131	NOT	1014.31	1.81e-10	0.712454	0.297	NOT	0.959894	0.319	NOT	0.625979	0.381	NOT	1.8305	0.0316	DIFF	1.20405	0.287	NOT
TU1097	2	-	953617	954125			AT2G03150.1		726.783	4.5e-09	656.697	2.61e-07	967.237	2.92e-05	690.027	0.00088296	1.05327	0.155	NOT	543.588	0.000744464	1.20808	0.326	NOT	719.083	9.29e-06	1.3451	0.355	NOT	0.903567	0.298	NOT	1.33085	0.43	NOT	0.787778	0.485	NOT	1.04211	0.089	NOT
TU1098	2	-	957925	958673			AT2G03150.1		719.972	1.33e-10	762.461	1.76e-14	581.448	1.88e-08	502.296	1.33e-10	1.43336	0.158	NOT	582.698	1.78e-07	1.3085	0.245	NOT	619.92	3.54e-08	0.93794	0.491	NOT	1.05901	0.358	NOT	0.807598	0.314	NOT	1.16007	0.3	NOT	1.23417	0.31	NOT
TU1099	2	+	1006429	1007206			AT2G03310.1		481.743	4.08e-07	436.201	5.7e-10	502.308	6.42e-09	429.693	1.61e-08	1.12113	0.4	NOT	487.955	4.37e-06	0.893937	0.413	NOT	520.856	2.27e-15	0.964389	0.272	NOT	0.905464	0.362	NOT	1.04269	0.476	NOT	1.13559	0.418	NOT	1.21216	0.251	NOT
TU1100	2	+	1039413	1039982			AT2G03440.1		770.585	3.9e-13	425.075	1.24e-05	441.08	1.05e-08	666.152	7.3e-09	1.15677	0.232	NOT	565.102	6.4e-07	0.752209	0.298	NOT	348.999	8.58e-05	1.26384	0.189	NOT	0.551626	0.0145	DIFF	0.572396	0.0505	NOT	0.848308	0.185	NOT	0.523903	0.0289	DIFF
TU1101	2	+	1043951	1047125			AT2G03470.1		1081.22	3.43e-15	591.1	3.3e-09	627.964	5.97e-09	1337.26	1.51e-20	0.808534	0.116	NOT	1457.64	6.21e-19	0.405519	0.00722	NOT	1428.89	2.14e-32	0.439477	0.00389	NOT	0.546697	0.298	NOT	0.580792	0.167	NOT	1.09002	0.34	NOT	1.06852	0.334	NOT
TU1102	2	-	1077539	1078183			AT2G03550.1		650.797	1.23e-08	864.434	3.8e-15	658.421	3.41e-09	729.962	9.79e-13	0.891549	0.48	NOT	701.881	1.36e-08	1.2316	0.135	NOT	809.979	6.08e-09	0.812887	0.27	NOT	1.32827	0.147	NOT	1.01171	0.383	NOT	0.961531	0.473	NOT	1.10962	0.373	NOT
TU1103	2	+	1147978	1150547			AT2G03760.1		1250.35	1.45e-32	951.343	7.73e-21	1250.82	1.01e-25	1253.34	1.07e-27	0.997614	0.398	NOT	802.699	2.44e-17	1.18518	0.184	NOT	978.943	1.3e-31	1.27773	0.224	NOT	0.760861	0.0283	NOT	1.00038	0.293	NOT	0.640448	0.00385	DIFF	0.781067	0.161	NOT
TU1104	2	+	1164642	1166648			AT2G03820.1		321.784	1.27e-09	394.653	1.4e-14	335.88	8.01e-11	400.27	4.52e-12	0.803917	0.0385	NOT	360.59	3.41e-13	1.09446	0.302	NOT	415.509	7.14e-12	0.808358	0.0809	NOT	1.22645	0.124	NOT	1.04381	0.307	NOT	0.900867	0.144	NOT	1.03807	0.238	NOT
TU1105	2	-	1185452	1188529			AT2G03890.1		543.113	2.68e-12	495.703	8.28e-12	418.526	9.37e-11	507.801	1.51e-15	1.06954	0.188	NOT	472.718	2.18e-10	1.04862	0.32	NOT	407.054	8.44e-09	1.02818	0.36	NOT	0.912707	0.372	NOT	0.770606	0.316	NOT	0.930912	0.14	NOT	0.801601	0.0423	DIFF
TU1106	2	-	1265098	1265855			AT2G03990.1		1478.06	4.14e-11	1226.68	3.44e-07	1842.02	7.7e-09	1120.39	1.4e-08	1.31924	0.401	NOT	1693.63	2.79e-08	0.72429	0.5	NOT	1437.41	8.86e-08	1.28149	0.307	NOT	0.829926	0.275	NOT	1.24624	0.484	NOT	1.51164	0.369	NOT	1.28296	0.339	NOT
TU1107	2	-	1282728	1283420			AT2G04030.1		522.45	1.08e-08	1193.09	4.3e-14	719.69	3.09e-09	642.274	4.11e-10	0.813438	0.239	NOT	1018.46	3.28e-13	1.17146	0.381	NOT	661.474	5.05e-12	1.08801	0.211	NOT	2.28364	0.0338	NOT	1.37753	0.426	NOT	1.58571	0.203	NOT	1.02989	0.381	NOT
TU1108	2	-	1285724	1286018			AT2G04030.1		1101.28	0.000200103	2439.09	1.04e-11	2927.68	1.21e-08	216.109	0.00334636	5.09595	0.424	NOT	1925.54	7.46e-11	1.2667	0.387	NOT	2648.88	1.66e-10	1.10525	0.374	NOT	2.21478	0.021	NOT	2.65843	0.0358	NOT	8.91004	0.00512	DIFF	12.2571	0.01	DIFF
TU1109	2	-	1381399	1383507					1059.41	1.86e-23	572.21	1.94e-12	780.894	9.22e-15	632.816	1.56e-14	1.67412	0.0327	NOT	837.723	2.86e-13	0.683054	0.423	NOT	640.106	3.77e-16	1.21994	0.244	NOT	0.540121	0.0137	DIFF	0.737103	0.0884	NOT	1.3238	0.428	NOT	1.01152	0.424	NOT
TU1110	2	+	1391918	1392784			AT2G04135.1		333.102	0.000906568	487.962	0.000147262	207.756	0.000544306	213.497	0.000881532	1.56022	0.11	NOT	1243.04	1.83e-11	0.392555	0.0101	NOT	330.644	0.00013579	0.628337	0.138	NOT	1.4649	0.389	NOT	0.623701	0.16	NOT	5.82228	0.000394	DIFF	1.54871	0.1	NOT
TU1111	2	-	1393189	1393600					126.178	0.0465154	479.177	0.000328311	180.181	0.0265297	282.91	0.0232295	0.446	0.315	NOT	7129.62	7.92e-18	0.0672093	1.33e-06	DIFF	1804.21	1.21e-09	0.099867	8.8e-05	DIFF	3.79763	0.0442	NOT	1.42799	0.456	NOT	25.201	7.64e-08	DIFF	6.37733	0.000185	DIFF
TU1112	2	-	1420747	1422018					507.669	5.33e-07	289.015	0.000610802	372.686	9.48e-06	906.841	8.98e-10	0.559821	0.155	NOT	452.248	0.000948059	0.639063	0.363	NOT	350.304	1.2e-05	1.06389	0.452	NOT	0.569298	0.0431	NOT	0.734112	0.0814	NOT	0.498707	0.00622	DIFF	0.38629	0.00352	DIFF
TU1113	2	+	1461585	1462365			AT2G04240.1		539.799	8.95e-06	674.771	4.17e-14	594.723	4.66e-15	524.472	2.63e-15	1.02922	0.381	NOT	856.439	3.97e-10	0.78788	0.174	NOT	468.449	1.07e-08	1.26956	0.0322	NOT	1.25004	0.322	NOT	1.10175	0.155	NOT	1.63295	0.0369	DIFF	0.893182	0.168	NOT
TU1114	2	+	1480639	1480940			AT2G04280.1		655.425	2.11e-05	747.723	3.66e-09	302.898	0.000215438	900.803	1.1e-15	0.727601	0.0804	NOT	634.33	7.52e-06	1.17876	0.199	NOT	586.17	2.76e-07	0.516741	0.0193	NOT	1.14082	0.0744	NOT	0.46214	0.0746	NOT	0.704183	0.14	NOT	0.650719	0.139	NOT
TU1115	2	+	1485657	1491019			AT2G04290.1		224.369	0.00204708	241.689	0.00320841	238.7	0.000308715	473.154	2.65e-24	0.474199	6.17e-05	DIFF	498.975	4.2e-23	0.484371	2.82e-07	DIFF	496.926	2.2e-25	0.480353	5.81e-05	DIFF	1.07719	0.421	NOT	1.06387	0.466	NOT	1.05457	0.222	NOT	1.05024	0.453	NOT
TU1116	2	-	1527855	1528385			AT2G04390.1		1132.88	3.96e-09	1176.09	5.12e-05	367.232	5.02e-06	1398.81	1.86e-10	0.809888	0.263	NOT	563.809	1.06e-05	2.08597	0.24	NOT	451.007	1.21e-05	0.814249	0.449	NOT	1.03814	0.257	NOT	0.324158	0.0487	NOT	0.403063	0.0285	DIFF	0.322422	0.00808	DIFF
TU1117	2	+	1574718	1575133			AT2G04520.1		2564.24	7.69e-13	3058.44	7.8e-16	1797.88	2.01e-11	3023.24	5.01e-16	0.848176	0.126	NOT	4474.15	7.94e-16	0.68358	0.0585	NOT	1785.37	2.29e-11	1.00701	0.459	NOT	1.19273	0.166	NOT	0.701136	0.325	NOT	1.47992	0.0702	NOT	0.590549	0.0282	DIFF
TU1118	2	+	1618811	1619796			AT2G04630.1		657.132	2.23e-12	463.029	1.85e-09	350.612	0.000233055	637.455	1.86e-07	1.03087	0.154	NOT	381.67	1.88e-05	1.21317	0.491	NOT	388.835	3.06e-09	0.901699	0.208	NOT	0.704621	0.0622	NOT	0.533549	0.0147	DIFF	0.59874	0.402	NOT	0.60998	0.418	NOT
TU1119	2	+	1630808	1636098			AT2G04670.1		633.898	2.51e-15	677.477	8.49e-13	744.078	1.33e-12	646.401	9.95e-13	0.980658	0.309	NOT	566.556	2.74e-10	1.19578	0.18	NOT	661.825	1.24e-11	1.12428	0.262	NOT	1.06875	0.395	NOT	1.17381	0.221	NOT	0.876478	0.466	NOT	1.02386	0.302	NOT
TU1120	2	-	1704268	1706598	AT2G04852	AT2G04852	AT2G04850.1		290.731	6.37e-07	312.967	0.000111459	481.233	2.09e-12	328.569	2.29e-08	0.88484	0.276	NOT	343.191	7.36e-07	0.911932	0.434	NOT	481.194	1.99e-13	1.00008	0.303	NOT	1.07648	0.485	NOT	1.65525	0.0901	NOT	1.0445	0.361	NOT	1.46451	0.0661	DIFF
TU1121	2	+	1799560	1800632			AT2G05070.1		2908.08	1.14e-11	3535.64	1.45e-12	1795.52	3.43e-10	3676.83	1.79e-12	0.79092	0.274	NOT	4205.64	1.44e-12	0.84069	0.274	NOT	1517.23	2.18e-13	1.18342	0.459	NOT	1.2158	0.0957	NOT	0.617425	0.175	NOT	1.14382	0.165	NOT	0.412646	0.039	DIFF
TU1122	2	+	1823573	1825843			AT2G05100.1		796.968	6.57e-10	1062.34	2.51e-13	750.727	2.32e-07	720.81	3.92e-09	1.10566	0.374	NOT	1113.99	1.83e-09	0.953635	0.471	NOT	664.166	1.37e-07	1.13033	0.476	NOT	1.33298	0.404	NOT	0.941979	0.163	NOT	1.54547	0.25	NOT	0.921416	0.311	NOT
TU1123	2	+	1840171	1842566			AT2G05120.1		685.756	1.61e-11	425.472	1.66e-05	723.472	6.51e-09	845.725	1.13e-19	0.81085	0.0999	NOT	918.392	4.12e-13	0.463279	0.0035	NOT	901.746	2.31e-09	0.802301	0.0315	NOT	0.620442	0.0733	NOT	1.055	0.222	NOT	1.08592	0.385	NOT	1.06624	0.473	NOT
TU1124	2	+	1930928	1934140			AT2G05310.1		1076.83	2.74e-19	2664.55	1.45e-31	1948.65	3.28e-30	1679.11	1.37e-30	0.64131	0.00106	NOT	3183.91	5.2e-39	0.83688	0.109	NOT	3154.67	5.61e-37	0.617703	0.00107	DIFF	2.47444	1.65e-07	DIFF	1.80962	0.000684	DIFF	1.89619	3.85e-05	DIFF	1.87878	6.11e-05	DIFF
TU1125	2	+	2023269	2024147	AT2G05518	AT2G05518			2037.97	1.04e-13	983.276	8.17e-10	793.65	7.17e-06	1331.89	7.72e-13	1.53013	0.281	NOT	1184.11	4.55e-10	0.830392	0.28	NOT	1248.39	1.35e-10	0.635739	0.0692	NOT	0.482478	0.0269	NOT	0.389432	0.00357	DIFF	0.889045	0.172	NOT	0.937307	0.199	NOT
TU1126	2	-	2026231	2027008			AT2G05520.1		15356.7	1.03e-15	11058	6.74e-20	4796.14	1.86e-16	15329.4	2.86e-18	1.00178	0.381	NOT	9905.86	1.76e-18	1.11631	0.299	NOT	6129.12	1.23e-17	0.782517	0.154	NOT	0.720077	0.466	NOT	0.312316	0.162	NOT	0.6462	0.388	NOT	0.399828	0.33	NOT
TU1127	2	-	2055744	2056551					10152.2	6.95e-22	9507.48	4.42e-17	9678.3	1.21e-19	7698.95	2.64e-22	1.31865	0.355	NOT	9753.11	4.97e-20	0.974815	0.398	NOT	9230.08	7.23e-19	1.04856	0.488	NOT	0.936495	0.355	NOT	0.95332	0.464	NOT	1.26681	0.424	NOT	1.19888	0.389	NOT
TU1128	2	+	2079203	2081830			AT2G05620.1		538.509	5.92e-24	635.471	2.3e-19	441.259	1.53e-13	521.619	1.61e-25	1.03238	0.433	NOT	548.002	1.19e-16	1.15961	0.0727	NOT	511.036	3.13e-14	0.86346	0.14	NOT	1.18006	0.125	NOT	0.819409	0.339	NOT	1.05058	0.423	NOT	0.979711	0.199	NOT
TU1129	2	+	2092159	2092823			AT2G05640.1		257.677	0.00723589	563.604	3.83e-06	517.785	2.31e-17	214.097	0.00948834	1.20355	0.462	NOT	217.475	0.0689409	2.59158	0.00859	NOT	352.987	0.000393594	1.46687	0.0921	NOT	2.18725	0.0335	NOT	2.00943	0.00685	DIFF	1.01578	0.28	NOT	1.64872	0.0784	NOT
TU1130	2	-	2115014	2115349					38806.8	2.58e-13	24493.1	1.94e-13	26610.3	1.05e-13	30747.3	2.13e-13	1.26212	0.31	NOT	29531.4	1.19e-13	0.829392	0.242	NOT	33937.3	1.63e-13	0.784102	0.176	NOT	0.631155	0.0827	NOT	0.685712	0.095	NOT	0.960455	0.375	NOT	1.10375	0.454	NOT
TU1131	2	-	2145928	2147075			AT2G05710.1		1466.17	1.76e-15	1894.68	6.78e-15	1080.62	3.03e-15	1444.5	1.19e-11	1.015	0.431	NOT	1346.1	5.86e-14	1.40753	0.123	NOT	1318.14	1.39e-11	0.819807	0.387	NOT	1.29226	0.13	NOT	0.737036	0.455	NOT	0.93188	0.404	NOT	0.912523	0.462	NOT
TU1132	2	+	2184549	2185095			AT2G05765.1	TU1133	253.704	0.00958025	546.695	1.64e-07	1011.35	6.05e-10	265.67	0.00787893	0.954959	0.286	NOT	390.397	0.00374	1.40036	0.131	NOT	877.09	5.74e-14	1.15307	0.397	NOT	2.15485	0.0236	NOT	3.98634	0.00212	DIFF	1.46948	0.138	NOT	3.30143	1.21e-05	DIFF
TU1133	2	-	2184673	2185174				TU1132	1595.13	2.14e-26	4622.29	7.56e-38	16797.1	7.21e-48	1077.27	1.27e-21	1.48072	0.139	NOT	3587.72	4.84e-35	1.28836	0.118	NOT	11910.6	7.53e-46	1.41026	0.0856	NOT	2.89775	0.00146	DIFF	10.5302	5.84e-07	DIFF	3.33038	0.00608	DIFF	11.0563	3.18e-07	DIFF
TU1134	2	-	2199358	2201105			AT2G05790.1		341.48	2.48e-16	279.048	3.73e-07	273.127	7.29e-08	493.193	7.04e-10	0.692386	0.155	NOT	318.501	1.96e-07	0.876129	0.329	NOT	292.62	0.000305983	0.933385	0.385	NOT	0.817172	0.0588	NOT	0.799833	0.0372	NOT	0.645794	0.0223	DIFF	0.593317	0.00719	DIFF
TU1135	2	+	2215270	2217718	AT2G05812	AT2G05812	AT2G05810.1		558.17	1.31e-21	442.538	1.05e-13	480.902	7.57e-18	456.003	7.55e-15	1.22405	0.185	NOT	721.851	5.79e-20	0.61306	0.0242	NOT	645.822	5.49e-24	0.744636	0.0225	NOT	0.792837	0.303	NOT	0.861569	0.341	NOT	1.583	0.00846	DIFF	1.41627	0.00697	DIFF
TU1136	2	-	2262583	2264614	AT2G05914	AT2G05914	AT2G05915.1		435.483	1.28e-11	410.91	3.46e-06	329.792	3.64e-07	1112.51	1.02e-23	0.391442	7.73e-06	DIFF	512.197	5.26e-14	0.80225	0.119	NOT	608.868	9.18e-22	0.541648	0.000298	DIFF	0.943573	0.405	NOT	0.757302	0.067	NOT	0.460398	0.000225	DIFF	0.547292	0.00786	DIFF
TU1137	2	+	2328255	2328842			AT2G06000.1		550.7	3.89e-05	473.089	9.15e-07	468.556	3.4e-06	544.163	4.77e-11	1.01201	0.284	NOT	488.269	6.63e-05	0.968911	0.475	NOT	463.538	1.32e-05	1.01083	0.408	NOT	0.859068	0.463	NOT	0.850837	0.497	NOT	0.897284	0.267	NOT	0.851837	0.309	NOT
TU1138	2	+	2427618	2430191			AT2G06210.1		1745.78	2.69e-11	1463.71	5.46e-09	1857.03	2.89e-08	1667.3	1.36e-09	1.04707	0.284	NOT	1230.77	5.95e-09	1.18926	0.421	NOT	1322.93	5.07e-08	1.40373	0.462	NOT	0.838428	0.372	NOT	1.06373	0.355	NOT	0.738181	0.133	NOT	0.793456	0.0961	NOT
TU1139	2	-	2604846	2605070					3356.59	7.32e-08	2624.2	1.86e-09	3389.65	2.06e-09	3057.46	1.19e-08	1.09784	0.369	NOT	2244.5	1.19e-05	1.16917	0.418	NOT	3107.61	1.34e-07	1.09076	0.431	NOT	0.781805	0.256	NOT	1.00985	0.494	NOT	0.734106	0.247	NOT	1.0164	0.382	NOT
TU1140	2	+	2753472	2754543					730.506	4.3e-06	852.723	7.41e-12	655.807	0.000148636	893.385	3.13e-14	0.817683	0.136	NOT	517.015	0.000141134	1.64932	0.0843	NOT	817.77	8.09e-07	0.801946	0.137	NOT	1.1673	0.281	NOT	0.897743	0.432	NOT	0.578715	0.0239	DIFF	0.915361	0.319	NOT
TU1141	2	-	2765082	2765587			AT2G06850.1		4304	1.62e-12	1104.8	8.22e-06	824.01	1.97e-05	7376.26	4.81e-15	0.583494	0.23	NOT	1778.5	1.01e-19	0.621198	0.0911	NOT	917.553	1.2e-07	0.898052	0.356	NOT	0.256691	0.169	NOT	0.191452	0.0635	NOT	0.241111	0.238	NOT	0.124393	0.0251	DIFF
TU1142	2	-	2771017	2772625			AT2G06860.1		910.192	4.27e-06	406.912	2.45e-05	649.095	9.67e-06	701.963	1.09e-05	1.29664	0.228	NOT	994.816	3.99e-11	0.409032	0.0595	NOT	770.781	3.13e-08	0.842126	0.243	NOT	0.447062	0.466	NOT	0.713141	0.461	NOT	1.41719	0.193	NOT	1.09804	0.421	NOT
TU1143	2	-	2901254	2901704					669.136	1.93e-07	1033.89	6.29e-09	711.89	4.68e-05	539.508	4.02e-07	1.24027	0.351	NOT	369.666	7.67e-07	2.79682	0.00874	NOT	509.075	0.000504656	1.3984	0.184	NOT	1.54511	0.262	NOT	1.06389	0.361	NOT	0.685191	0.111	NOT	0.943591	0.269	NOT
TU1144	2	-	2938166	2938815			AT2G07080.1		2606.46	5.05e-26	2818.67	1.03e-14	1550.84	8.92e-17	4109.82	6.49e-12	0.634203	0.376	NOT	1611.29	2.02e-14	1.74933	0.273	NOT	1240.75	1.4e-19	1.24992	0.475	NOT	1.08142	0.4	NOT	0.594999	0.0908	NOT	0.392059	0.108	NOT	0.301899	0.0296	DIFF
TU1145	2	+	2981018	2981586			AT2G07180.1		1983.36	7.11e-16	1081.27	1.71e-14	892.465	7.11e-09	2167.63	1.48e-12	0.91499	0.448	NOT	1555.71	1.33e-12	0.695033	0.195	NOT	1651	4.42e-13	0.54056	0.113	NOT	0.545171	0.0623	NOT	0.449976	0.0357	NOT	0.717701	0.278	NOT	0.761661	0.215	NOT
TU1146	2	-	3000898	3002730			AT2G07220.1,AT2G07230.1		498.545	8.03e-11	478.23	2.46e-13	498.431	1.37e-09	379.162	8.08e-08	1.31486	0.392	NOT	454.662	2.18e-15	1.05184	0.479	NOT	441.351	2e-11	1.12933	0.365	NOT	0.959251	0.484	NOT	0.999771	0.494	NOT	1.19912	0.327	NOT	1.16402	0.468	NOT
TU1147	2	-	3003888	3004637			AT2G07230.1		308.203	7.59e-05	351.517	1.23e-05	310.602	0.00244569	366.038	3.84e-08	0.841997	0.479	NOT	435.043	1.04e-07	0.808005	0.391	NOT	561.969	6.68e-11	0.552703	0.105	NOT	1.14054	0.412	NOT	1.00778	0.446	NOT	1.18852	0.333	NOT	1.53528	0.141	NOT
TU1148	2	+	3188028	3188290				TU1149	5983.67	6.11e-20	3325.89	6.32e-19	3706.39	6.45e-22	4566.89	4.28e-20	1.31023	0.418	NOT	2734.93	5.7e-19	1.21608	0.25	NOT	4199.48	5.86e-22	0.882583	0.445	NOT	0.555828	0.223	NOT	0.619418	0.284	NOT	0.59886	0.175	NOT	0.919549	0.466	NOT
TU1149	2	-	3188039	3190422				TU1148,TU1150	6849	2.12e-26	3819.95	2.22e-17	6866.92	7.36e-22	12095.8	5.53e-27	0.56623	0.186	NOT	4771.81	1.87e-20	0.800524	0.232	NOT	3740.18	2.67e-22	1.83599	0.385	NOT	0.557738	0.154	NOT	1.00262	0.477	NOT	0.394501	0.109	NOT	0.309213	0.127	NOT
TU1150	2	+	3188993	3189499				TU1149	447.275	4.46e-07	405.142	8.47e-06	385.292	6.34e-05	675.323	4.24e-12	0.662313	0.437	NOT	377.163	1.6e-07	1.07418	0.128	NOT	539.593	1.26e-14	0.714042	0.295	NOT	0.905801	0.0346	NOT	0.861421	0.243	NOT	0.558493	0.131	NOT	0.799015	0.382	NOT
TU1151	2	+	3251586	3257552			AT2G07671.1,AT2G07743.1,AT2G07779.1	TU1152,TU1153,TU1154	305.094	4.13e-17	538.495	7.31e-58	442.777	4.93e-45	260.151	1.07e-23	1.17276	0.208	NOT	543.947	5.43e-47	0.989977	0.479	NOT	459.044	3.63e-52	0.964563	0.0575	NOT	1.76501	5.32e-08	DIFF	1.45128	0.000536	DIFF	2.09089	2.07e-10	DIFF	1.76453	2.29e-09	DIFF
TU1152	2	-	3252117	3252319				TU1151	5472.76	2.37e-70	29380.4	3.85e-111	29051.5	8.57e-107	5375.23	4.03e-75	1.01814	0.341	NOT	30366.4	2.65e-110	0.96753	0.368	NOT	27600	1.23e-112	1.05259	0.495	NOT	5.36848	1.37e-09	DIFF	5.30838	1.3e-08	DIFF	5.64932	8.63e-10	DIFF	5.13466	1.36e-09	DIFF
TU1153	2	-	3255372	3255807				TU1151	709.209	4.31e-31	7342.49	5.65e-102	7442.38	2.58e-98	430.673	1.17e-21	1.64675	0.0245	NOT	7073.53	2.35e-101	1.03802	0.473	NOT	6595.36	3.12e-95	1.12843	0.365	NOT	10.3531	1.05e-10	DIFF	10.4939	2.38e-10	DIFF	16.4244	1.61e-13	DIFF	15.3141	2.37e-12	DIFF
TU1154	2	-	3255915	3262227			AT2G07672.1	TU1151	398.17	4.24e-43	2219.14	2.67e-87	2074.23	1.79e-74	350.379	1.35e-25	1.1364	0.0389	NOT	2214.78	8.36e-94	1.00197	0.362	NOT	1806.56	1.16e-74	1.14817	0.196	NOT	5.57335	0	DIFF	5.20941	0	DIFF	6.3211	0	DIFF	5.15602	0	DIFF
TU1155	2	+	3258297	3266212			AT2G07684.1	TU1156	656.014	2.97e-63	5008.86	5.09e-142	4907	1.26e-131	542.292	5.9e-54	1.20971	0.026	NOT	4014.34	6.86e-138	1.24774	0.000675	DIFF	3467.92	8.25e-127	1.41497	3.48e-06	DIFF	7.63529	0	DIFF	7.48002	0	DIFF	7.40254	0	DIFF	6.39493	0	DIFF
TU1156	2	-	3263805	3269919			AT2G07673.1,AT2G07674.1,AT2G07745.1	TU1155,TU1157,TU1158	274.422	7.68e-20	950.818	1.4e-76	771.059	4.9e-67	262.783	4.36e-13	1.04429	0.36	NOT	1133.19	3.04e-88	0.839063	0.0608	NOT	847.368	6.76e-70	0.909946	0.0149	NOT	3.4648	0	DIFF	2.80976	0	DIFF	4.31227	0	DIFF	3.22459	0	DIFF
TU1157	2	+	3267606	3268743				TU1156	250.637	1.04e-08	954.868	2.7e-35	745.657	2.96e-27	318.196	4.04e-09	0.787681	0.103	NOT	1023.33	1.16e-42	0.933099	0.164	NOT	809.107	1.4e-28	0.92158	0.337	NOT	3.80976	3.9e-09	DIFF	2.97505	2.05e-07	DIFF	3.21604	1.61e-09	DIFF	2.54279	9.87e-06	DIFF
TU1158	2	+	3268923	3269132				TU1156	1086.49	1.03e-20	8182.16	1.02e-56	9787.1	4.56e-50	937.833	1.66e-22	1.15851	0.302	NOT	9074.82	5.93e-63	0.901633	0.436	NOT	9697.93	1.3e-50	1.00919	0.446	NOT	7.53082	2.42e-08	DIFF	9.008	3.08e-06	DIFF	9.67637	2.31e-08	DIFF	10.3408	5.66e-08	DIFF
TU1159	2	+	3273035	3274753	AT2G07768	AT2G07768			466.863	5.41e-27	4029.76	8.06e-91	5509.32	1.13e-96	504.483	1.05e-17	0.925429	0.319	NOT	5974.08	2.44e-103	0.674541	0.000129	DIFF	6188.26	3.72e-103	0.890286	0.152	NOT	8.63157	0	DIFF	11.8007	0	DIFF	11.842	0	DIFF	12.2665	0	DIFF
TU1160	2	-	3274533	3285226			AT2G07678.1,AT2G07746.1,AT2G07748.1	TU1161	440.087	5.55e-32	2089.54	1.93e-76	2199.75	1.11e-80	434.164	3.14e-32	1.01364	0.218	NOT	2097.79	1.47e-81	0.996067	0.491	NOT	1952.98	5.47e-89	1.12636	0.309	NOT	4.74802	0	DIFF	4.99844	0	DIFF	4.83179	0	DIFF	4.49825	0	DIFF
TU1161	2	+	3275446	3276419				TU1160	538.989	2.68e-39	2494.71	4.23e-87	2794.82	1.57e-91	452.828	2.91e-25	1.19027	0.0526	NOT	3398.1	2.07e-100	0.734148	0.0431	NOT	2856.78	2e-93	0.978311	0.11	NOT	4.6285	3.22e-11	DIFF	5.1853	1.28e-09	DIFF	7.50417	0	DIFF	6.30875	0	DIFF
TU1162	2	+	3281904	3283119					711.055	3.82e-39	10986.8	2.61e-148	10088.6	6.5e-134	657.022	2.37e-41	1.08224	0.358	NOT	10739.7	2.26e-140	1.02301	0.423	NOT	9556.96	6.83e-135	1.05563	0.29	NOT	15.4514	0	DIFF	14.1882	0	DIFF	16.346	0	DIFF	14.5459	0	DIFF
TU1163	2	+	3283587	3288999					269.657	4.07e-29	1319.3	1.71e-110	1438.87	1.87e-116	223.446	7e-22	1.20681	0.0425	NOT	1241.74	2.64e-120	1.06246	0.29	NOT	1106.24	1.12e-116	1.30069	0.0353	NOT	4.89251	0	DIFF	5.33593	0	DIFF	5.55723	0	DIFF	4.95082	0	DIFF
TU1164	2	+	3295403	3301783			AT2G07682.1,AT2G07772.1	TU1165	412.997	4.88e-60	948.896	2.73e-81	957.013	1.64e-81	483.649	3.27e-88	0.853919	0.235	NOT	1097.48	1.59e-103	0.864613	0.0264	NOT	1047.77	4.52e-99	0.913381	0.0188	NOT	2.29759	1.52e-10	DIFF	2.31724	1.69e-10	DIFF	2.26917	4.41e-13	DIFF	2.16639	8.6e-14	DIFF
TU1165	2	-	3299073	3300806				TU1164	554.131	7.9e-20	3885.33	2.49e-95	3490.21	3.72e-98	639.493	5.86e-24	0.866516	0.345	NOT	3804.66	1.84e-120	1.0212	0.438	NOT	2886.1	4.81e-100	1.20932	0.175	NOT	7.01157	0	DIFF	6.29853	0	DIFF	5.94949	0	DIFF	4.51311	0	DIFF
TU1166	2	-	3304603	3309271			AT2G07685.1		254.077	4.19e-10	1027.88	3.14e-66	996.576	2.24e-76	263.837	2.26e-20	0.963007	0.185	NOT	1148.27	1.29e-63	0.895155	0.155	NOT	965.289	1.3e-75	1.03241	0.42	NOT	4.04555	0	DIFF	3.92234	0	DIFF	4.35219	0	DIFF	3.65866	0	DIFF
TU1167	2	-	3312659	3316015					1118.71	2.35e-65	8214.41	6.56e-136	7366.47	8.73e-138	888.186	2.22e-61	1.25954	0.399	NOT	8552.69	9.1e-139	0.960448	0.302	NOT	6976.01	1.97e-129	1.05597	0.461	NOT	7.34275	0	DIFF	6.58479	0	DIFF	9.62939	0	DIFF	7.85422	0	DIFF
TU1168	2	-	3316164	3317646					317.335	3.72e-07	361.68	5.94e-14	332.797	8.82e-10	295.618	3.82e-08	1.07346	0.396	NOT	399.708	3.53e-11	0.904861	0.328	NOT	403.985	2.34e-12	0.823786	0.155	NOT	1.13974	0.219	NOT	1.04872	0.403	NOT	1.35211	0.0698	NOT	1.36658	0.0662	DIFF
TU1169	2	-	3325295	3328516					350.581	4.2e-46	1739.84	1.5e-83	1144.97	9.02e-73	365.372	1.02e-30	0.959518	0.422	NOT	1798.6	2.39e-79	0.96733	0.467	NOT	1202.18	1.55e-89	0.952411	0.138	NOT	4.96273	0	DIFF	3.26592	0	DIFF	4.92265	0	DIFF	3.29029	0	DIFF
TU1170	2	-	3329776	3338619					39593.8	1.98e-88	70697.1	7.16e-91	67837.4	2.14e-92	48537.8	1.21e-90	0.815731	0.0998	NOT	64116.1	4.23e-92	1.10264	0.231	NOT	77126.5	2.6e-91	0.87956	0.146	NOT	1.78556	0.000454	DIFF	1.71333	0.0015	DIFF	1.32095	0.0445	DIFF	1.589	0.00207	DIFF
TU1171	2	+	3332763	3336101					1137.84	9.85e-82	5926.57	5.17e-117	5602.38	7.19e-118	1127.9	1.25e-83	1.00881	0.45	NOT	6165.19	7.35e-117	0.961296	0.241	NOT	5655.9	3.02e-117	0.990537	0.381	NOT	5.20861	0	DIFF	4.9237	0	DIFF	5.46608	0	DIFF	5.01454	0	DIFF
TU1172	2	-	3342150	3344159			AT2G07693.1		612.3	8.26e-21	1653.98	9.48e-44	1839.31	6.98e-50	526.993	3.66e-11	1.16188	0.142	NOT	1514.24	1.41e-52	1.09228	0.42	NOT	1513.1	1.82e-48	1.21559	0.257	NOT	2.70126	1.33e-08	DIFF	3.00394	2.72e-08	DIFF	2.87336	1.62e-10	DIFF	2.8712	2.41e-09	DIFF
TU1173	2	+	3342877	3346946					1420.76	3.9e-46	13429.5	1.57e-129	16640.1	2.37e-126	1510.21	2.9e-50	0.94077	0.317	NOT	14522.4	5.56e-123	0.924744	0.33	NOT	17940.7	6.03e-129	0.927506	0.318	NOT	9.45234	1.11e-15	DIFF	11.7121	1.15e-14	DIFF	9.61615	8.88e-16	DIFF	11.8796	5.55e-16	DIFF
TU1174	2	+	3347915	3348046					3287.09	2.06e-38	11844.7	4.68e-116	16667.8	3.43e-121	3934.49	1.28e-46	0.835455	0.45	NOT	12228	1.16e-119	0.968654	0.376	NOT	16085.1	2.34e-116	1.03623	0.437	NOT	3.6034	0.000222	DIFF	5.07069	6.45e-05	DIFF	3.1079	0.00025	DIFF	4.08823	0.000197	DIFF
TU1175	2	+	3355109	3361310	AT2G07798	AT2G07798	AT2G07697.1	TU1176	262.288	6.74e-69	496.192	2.45e-139	467.567	2.17e-142	265.649	6.8e-63	0.987348	0.448	NOT	535.063	3.74e-141	0.927352	0.317	NOT	523.612	2.61e-139	0.892965	0.0167	NOT	1.89178	1.88e-13	DIFF	1.78265	5.67e-11	DIFF	2.01417	2.73e-14	DIFF	1.97107	0	DIFF
TU1176	2	-	3358066	3366614				TU1175	280.229	2.52e-08	2564.57	6.07e-84	3539.03	3.81e-84	285.273	1.14e-10	0.982319	0.259	NOT	2700.46	4.64e-84	0.949679	0.281	NOT	3287.89	5.51e-93	1.07638	0.29	NOT	9.15169	0	DIFF	12.6291	0	DIFF	9.46623	0	DIFF	11.5254	0	DIFF
TU1177	2	+	3377383	3379746					970.42	3.22e-46	6166.96	4.36e-126	4880.79	2.65e-105	605.851	5.91e-22	1.60175	0.000986	NOT	6645.2	1.86e-122	0.928032	0.256	NOT	4076.2	3.03e-111	1.19739	0.128	NOT	6.35494	0	DIFF	5.02956	0	DIFF	10.9684	0	DIFF	6.72806	0	DIFF
TU1178	2	+	3385439	3386284					2763.96	1.08e-37	2112.61	6.16e-47	2756.18	2.45e-56	2444.94	2.4e-38	1.13048	0.434	NOT	1974.85	8.05e-52	1.06976	0.44	NOT	3127.43	5.15e-53	0.881292	0.497	NOT	0.764342	0.185	NOT	0.997185	0.22	NOT	0.807729	0.282	NOT	1.27914	0.213	NOT
TU1179	2	+	3389445	3402081					651.532	6.79e-50	3848.34	4.22e-106	4293.17	1e-101	561.251	1.75e-46	1.16086	0.0361	NOT	4471.3	4.57e-124	0.860676	0.0127	NOT	4102.48	5.47e-113	1.04648	0.459	NOT	5.9066	0	DIFF	6.58935	0	DIFF	7.96667	0	DIFF	7.30953	0	DIFF
TU1180	2	-	3398467	3407276					689.633	1.25e-44	4870.88	6.38e-110	4566.31	3.11e-111	714.103	2.12e-52	0.965733	0.467	NOT	6197.63	1.83e-113	0.785926	0.0131	NOT	6156.86	3.69e-120	0.741662	0.00108	DIFF	7.063	0	DIFF	6.62136	0	DIFF	8.6789	0	DIFF	8.62181	0	DIFF
TU1181	2	+	3407664	3411171			AT2G07714.1	TU1182	261.645	2.12e-13	712.904	3.14e-55	769.003	1.39e-60	289.936	2.03e-14	0.902423	0.172	NOT	845.478	2.98e-66	0.843196	0.145	NOT	723.15	1.64e-70	1.06341	0.359	NOT	2.7247	7.85e-14	DIFF	2.93911	1.92e-13	DIFF	2.91608	4.72e-14	DIFF	2.49417	3.13e-14	DIFF
TU1182	2	-	3411059	3417099			AT2G07715.1	TU1181,TU1183	347.03	3.08e-32	569.932	1.96e-61	567.183	1.5e-51	344.893	2.31e-35	1.0062	0.0402	NOT	633.799	6.19e-59	0.899231	0.291	NOT	564.943	6.99e-64	1.00397	0.299	NOT	1.64231	2.73e-05	DIFF	1.63439	5.45e-06	DIFF	1.83767	2.14e-09	DIFF	1.63802	2.22e-10	DIFF
TU1183	2	+	3412186	3426149				TU1182	835.931	7.74e-60	4716.28	7.05e-124	5727.84	8.64e-124	1022.46	3.71e-82	0.817568	0.0203	NOT	5027.45	1.45e-130	0.938106	0.289	NOT	5434.38	5.53e-135	1.054	0.494	NOT	5.64195	0	DIFF	6.85205	0	DIFF	4.91701	0	DIFF	5.315	0	DIFF
TU1184	2	+	3431130	3438723				TU1186	9331.16	1.5e-126	45989.9	4.36e-227	39165	1.16e-227	5880.04	2.72e-117	1.58692	0.00701	NOT	40150.1	2.19e-224	1.14545	0.178	NOT	36011.7	4.45e-214	1.08756	0.253	NOT	4.92864	0	DIFF	4.19723	0	DIFF	6.8282	0	DIFF	6.1244	0	DIFF
TU1185	2	-	3431130	3438723					482.466	9.17e-06	2183.8	7.26e-53	1592.47	4.94e-41	519.641	8.26e-05	0.92846	0.474	NOT	3108.91	2.91e-50	0.702433	0.0736	NOT	2095.86	1.43e-41	0.759817	0.0537	NOT	4.52633	9.07e-05	DIFF	3.30069	0.00424	DIFF	5.9828	3.69e-06	DIFF	4.03328	0.000419	DIFF
TU1186	2	-	3436277	3439944			AT2G07722.1	TU1184	638.583	3.25e-55	1864.4	1.74e-91	1839.18	6.52e-91	552.803	5.01e-39	1.15517	0.203	NOT	1985.71	8.61e-94	0.938909	0.149	NOT	1804.11	1.19e-92	1.01944	0.383	NOT	2.91959	0	DIFF	2.8801	0	DIFF	3.59208	0	DIFF	3.26357	0	DIFF
TU1187	2	-	3440720	3444349					2046.34	8.49e-91	10141.7	1.93e-128	7541.06	5.85e-116	1453.33	1.99e-83	1.40804	0.00535	NOT	11207.3	8.63e-144	0.904919	0.112	NOT	7385.78	5.58e-118	1.02102	0.288	NOT	4.95602	0	DIFF	3.68515	0	DIFF	7.71146	0	DIFF	5.08197	0	DIFF
TU1188	2	-	3446737	3450892			AT2G07725.1,AT2G07727.1		362.277	3.29e-27	617.454	6.81e-30	506.373	1.05e-29	431.47	1.65e-52	0.839634	0.0249	NOT	627.863	2.29e-36	0.983422	0.476	NOT	571.801	1.21e-31	0.885576	0.341	NOT	1.70437	0.000943	DIFF	1.39775	0.0321	DIFF	1.45517	0.107	NOT	1.32524	0.337	NOT
TU1189	2	-	3451374	3456714			AT2G07728.1,AT2G07757.1	TU1190	424.232	2.72e-14	1322.04	3.44e-65	1679.46	2.77e-58	412.701	1.51e-14	1.02794	0.122	NOT	1487.37	1.71e-64	0.888844	0.461	NOT	1526.04	3.02e-59	1.10053	0.237	NOT	3.11631	1.34e-13	DIFF	3.95882	0	DIFF	3.60399	3.59e-13	DIFF	3.69769	1.11e-16	DIFF
TU1190	2	+	3453077	3453678				TU1189	459.489	7.11e-10	4306.08	6.17e-39	4441.48	1.2e-46	377.44	8.33e-07	1.21738	0.153	NOT	4211.08	1.15e-46	1.02256	0.362	NOT	2781	7.07e-51	1.59708	0.274	NOT	9.37145	0.000485	DIFF	9.66613	0.00195	DIFF	11.157	0.000259	DIFF	7.36806	0.000171	DIFF
TU1191	2	-	3457748	3459163					296.757	2.51e-26	855.738	1.42e-47	713.976	1.21e-39	286.97	3.05e-12	1.0341	0.275	NOT	1006.94	9.23e-55	0.84984	0.356	NOT	520.474	3.85e-34	1.37178	0.148	NOT	2.88363	7.17e-07	DIFF	2.40593	5.09e-05	DIFF	3.50887	6.74e-08	DIFF	1.81369	0.000332	DIFF
TU1192	2	+	3462176	3463007					6854.13	1.38e-108	44569.4	1.35e-141	53263.7	5.37e-142	3630.84	1.85e-89	1.88775	0.000108	DIFF	40144.2	1.12e-142	1.11023	0.237	NOT	40759.4	4.44e-158	1.30678	0.0101	NOT	6.50256	0	DIFF	7.77104	0	DIFF	11.0564	0	DIFF	11.2259	0	DIFF
TU1193	2	-	3465481	3472159	AT2G07732	AT2G07732		TU1194	614.505	8.26e-62	5065.77	4.7e-125	4717.23	1.45e-118	624.161	3.31e-64	0.98453	0.387	NOT	6565.85	1.09e-136	0.771533	0.00091	DIFF	6183.9	7.5e-130	0.762824	0.00399	NOT	8.24366	0	DIFF	7.67647	0	DIFF	10.5195	0	DIFF	9.90754	0	DIFF
TU1194	2	+	3467798	3468720				TU1193	2270.52	8.77e-44	1686.42	5.21e-44	1501.12	4.39e-46	6531.07	4.72e-65	0.347649	1.02e-06	DIFF	4423.61	2.51e-76	0.381232	1.38e-06	DIFF	2966.36	6.01e-57	0.506048	1.81e-05	DIFF	0.742746	0.0285	NOT	0.661135	0.005	DIFF	0.677318	0.0231	DIFF	0.454192	9.88e-05	DIFF
TU1195	2	-	3480646	3480945					10225.2	1.69e-08	11738.7	1.42e-34	13991.6	9.62e-28	10657	1.35e-08	0.959482	0.383	NOT	8355.15	1.67e-29	1.40497	0.196	NOT	12702.7	8.84e-27	1.10147	0.378	NOT	1.14802	0.494	NOT	1.36834	0.476	NOT	0.784006	0.465	NOT	1.19196	0.297	NOT
TU1196	2	-	3482089	3488448			AT2G07775.1	TU1197,TU1198,TU1199	260.441	9e-22	466.465	6.17e-51	425.521	2.42e-36	273.556	1.99e-19	0.952057	0.0597	NOT	535.044	1.25e-38	0.871825	0.255	NOT	419.602	3.85e-45	1.01411	0.448	NOT	1.79106	8.22e-08	DIFF	1.63385	6.54e-09	DIFF	1.95588	5.63e-06	DIFF	1.53388	2.52e-05	DIFF
TU1197	2	+	3482666	3483307				TU1196	980.536	8.87e-21	3313.41	1.48e-78	4550.3	1.64e-76	710.473	3.05e-10	1.38012	0.159	NOT	3429.68	8.56e-79	0.966099	0.347	NOT	4222.74	2.2e-75	1.07757	0.458	NOT	3.37918	6.29e-10	DIFF	4.64063	7.07e-10	DIFF	4.82732	4.45e-12	DIFF	5.94356	1.68e-11	DIFF
TU1198	2	+	3484275	3486891	AT2G07806	AT2G07806		TU1196	376.052	3.14e-19	2577.17	1.71e-77	2929.82	1.79e-72	413.892	4.33e-15	0.908575	0.234	NOT	2378.14	5.97e-70	1.08369	0.255	NOT	2093.88	4.87e-70	1.39923	0.0263	NOT	6.85323	0	DIFF	7.791	0	DIFF	5.7458	0	DIFF	5.059	0	DIFF
TU1199	2	+	3487114	3493276				TU1196	421.188	1.51e-35	7985.63	8.03e-140	6288.22	6.38e-130	340.755	7.2e-30	1.23604	0.122	NOT	6192.33	2.1e-137	1.2896	0.0149	NOT	4819.09	2.69e-136	1.30486	0.122	NOT	18.9598	0	DIFF	14.9297	0	DIFF	18.1724	0	DIFF	14.1424	0	DIFF
TU1200	2	+	3493623	3494025	AT2G07795	AT2G07795			233.83	0.000144965	2086.47	1.33e-59	1175.48	3.37e-49	139.079	2.21e-05	1.68127	0.326	NOT	1360.9	2.65e-39	1.53315	0.073	NOT	1111.74	3.29e-36	1.05733	0.324	NOT	8.92302	4.53e-06	DIFF	5.02707	0.000447	DIFF	9.78509	0.000176	DIFF	7.99359	0.000435	DIFF
TU1201	2	+	3495781	3496060			AT2G07739.1		1897.13	1.59e-47	36541.8	3.03e-172	32880.4	7.03e-145	1611.41	2.44e-41	1.17731	0.155	NOT	34139.2	7.08e-170	1.07038	0.296	NOT	30063.7	6.78e-172	1.09369	0.241	NOT	19.2616	1.98e-14	DIFF	17.3317	1.14e-13	DIFF	21.1859	4.09e-14	DIFF	18.6568	1.98e-14	DIFF
TU1202	2	-	3496113	3501376				TU1204	807.241	1.93e-23	3393.14	4.49e-60	3716.18	3.25e-52	1050.44	3.85e-34	0.768479	0.417	NOT	4108.1	1.24e-57	0.825963	0.368	NOT	3633.03	4.44e-66	1.02289	0.229	NOT	4.20338	5.14e-06	DIFF	4.60356	8.44e-08	DIFF	3.91084	2.8e-06	DIFF	3.45858	3.23e-05	DIFF
TU1203	2	+	3496113	3501376					1021.18	1.08e-39	18037.3	3.74e-93	15418	3.03e-94	521.816	7.8e-21	1.95697	0.00811	NOT	14585.2	4.11e-96	1.23669	0.163	NOT	11270.2	1.83e-95	1.36803	0.146	NOT	17.6632	7.33e-13	DIFF	15.0982	2.13e-13	DIFF	27.9508	6.66e-16	DIFF	21.598	8.88e-16	DIFF
TU1204	2	+	3497514	3502086			AT2G07835.1	TU1202	746.381	1.5e-58	10311.9	1.01e-172	10887.3	1.78e-161	494.84	4.69e-42	1.50833	0.000557	DIFF	8553.72	3.98e-165	1.20555	0.00141	DIFF	8613.33	4.3e-157	1.26401	5.15e-05	DIFF	13.8159	0	DIFF	14.5868	0	DIFF	17.2858	0	DIFF	17.4063	0	DIFF
TU1205	2	-	3503506	3509618			AT2G07766.1		929.573	1.26e-14	987.419	3.43e-18	809.338	3.72e-12	771.225	6.14e-18	1.20532	0.439	NOT	1127.78	5.39e-18	0.875542	0.439	NOT	771.886	2e-14	1.04852	0.464	NOT	1.06223	0.416	NOT	0.870656	0.426	NOT	1.46232	0.462	NOT	1.00086	0.484	NOT
TU1206	2	+	3537707	3539012					206.004	0.0134009	271.986	0.00180959	436.665	1.2e-07	373.782	0.00067726	0.551134	0.168	NOT	486.101	2.85e-08	0.559526	0.0612	NOT	793.294	7.76e-17	0.550445	0.00916	NOT	1.32029	0.268	NOT	2.11969	0.0264	DIFF	1.30049	0.105	NOT	2.12234	0.00189	DIFF
TU1207	2	-	3726119	3726416					439.953	0.0147901	6677.83	4.44e-09	5621.28	0.000145089	438.98	0.0079266	1.00222	0.34	NOT	5264.51	2e-05	1.26846	0.26	NOT	4388.14	0.00265962	1.28102	0.446	NOT	15.1785	0.000151	DIFF	12.777	0.0127	DIFF	11.9926	0.00446	DIFF	9.99622	0.0458	DIFF
TU1208	2	-	3788484	3788963			AT2G09990.1		858.568	5.24e-10	1271.34	1.89e-09	1204.69	1.7e-09	1515.22	4.85e-10	0.566629	0.117	NOT	2258.04	1.08e-07	0.563028	0.174	NOT	822.956	6.95e-12	1.46386	0.459	NOT	1.48077	0.409	NOT	1.40314	0.208	NOT	1.49024	0.426	NOT	0.543126	0.164	NOT
TU1209	2	+	4228230	4232190					421.77	3.03e-09	504.743	1.04e-09	500.683	2.31e-09	570.523	4.35e-08	0.739269	0.114	NOT	482.231	7.45e-09	1.04668	0.378	NOT	523.948	2.47e-10	0.955597	0.275	NOT	1.19673	0.102	NOT	1.1871	0.212	NOT	0.845244	0.398	NOT	0.918364	0.448	NOT
TU1210	2	+	4318244	4319234			AT2G10940.1		887.68	6.71e-12	543.768	1.02e-08	1059.02	2.67e-14	601.322	3.02e-15	1.47621	0.312	NOT	468.802	1.33e-07	1.15991	0.45	NOT	527.543	4.98e-14	2.00746	0.217	NOT	0.612572	0.146	NOT	1.19302	0.382	NOT	0.779619	0.287	NOT	0.877305	0.463	NOT
TU1211	2	+	4322555	4323037			AT2G10950.1		824.34	4.38e-07	842.632	5.52e-07	716.722	7.81e-09	1242.31	5.82e-10	0.663554	0.297	NOT	705.353	4.52e-10	1.19462	0.459	NOT	866.501	4.76e-12	0.827145	0.385	NOT	1.02219	0.345	NOT	0.869449	0.262	NOT	0.567775	0.118	NOT	0.697492	0.157	NOT
TU1212	2	-	4355744	4356102			AT2G11005.1		14519.1	1.26e-09	13626.4	5.31e-11	11300.8	9.78e-10	10981.4	4.32e-09	1.32215	0.404	NOT	12647.1	1.32e-10	1.07743	0.452	NOT	12360.8	1.85e-14	0.914245	0.332	NOT	0.938515	0.44	NOT	0.77834	0.464	NOT	1.15168	0.434	NOT	1.12561	0.349	NOT
TU1213	2	+	4423937	4424680			AT2G11140.1		303.4	1.18e-07	312.078	0.000199575	561.481	6.8e-12	332.788	2.89e-05	0.911692	0.399	NOT	303.381	7.23e-06	1.02867	0.485	NOT	283.216	0.00391673	1.98252	0.00553	NOT	1.0286	0.437	NOT	1.85063	0.0154	DIFF	0.911634	0.475	NOT	0.85104	0.419	NOT
TU1214	2	+	4566123	4571809			AT2G11430.1		367.834	4.1e-16	504.052	7.67e-12	710.241	9.96e-18	343.19	1.87e-12	1.07181	0.451	NOT	594.03	2.73e-17	0.84853	0.238	NOT	539.12	5.94e-13	1.31741	0.483	NOT	1.37032	0.305	NOT	1.93087	0.164	NOT	1.73091	0.133	NOT	1.57091	0.222	NOT
TU1215	2	-	4666835	4667836			AT2G11620.1		424.74	3.27e-08	546.132	6.3e-07	945.741	2.13e-10	731.783	3.37e-08	0.580418	0.219	NOT	564.08	9.31e-10	0.968182	0.178	NOT	699.358	2.79e-09	1.3523	0.0689	NOT	1.2858	0.229	NOT	2.22664	0.129	NOT	0.77083	0.127	NOT	0.95569	0.179	NOT
TU1216	2	+	4812937	4813408			AT2G11910.1		1221.1	1.9e-08	982.969	2.61e-07	1012.99	3.85e-08	1579.5	3.12e-09	0.773093	0.442	NOT	1066.54	2.71e-09	0.921643	0.466	NOT	972.857	3.39e-05	1.04125	0.386	NOT	0.804986	0.322	NOT	0.829572	0.246	NOT	0.675239	0.24	NOT	0.615927	0.103	NOT
TU1217	2	+	4935146	4935997			AT2G12300.1		684.352	7.12e-08	752.167	5.66e-08	683.102	1.16e-06	730.776	3.69e-14	0.936473	0.177	NOT	549.805	3.81e-05	1.36806	0.187	NOT	458.737	3.63e-07	1.48909	0.0817	NOT	1.09909	0.462	NOT	0.998173	0.374	NOT	0.752358	0.0387	DIFF	0.62774	0.0369	DIFF
TU1218	2	+	5016292	5017121					217.861	0.030773	221.715	0.0515801	152.963	0.135694	331.895	0.000268888	0.656415	0.216	NOT	305.548	0.00026616	0.725631	0.0245	NOT	449.368	5.16e-11	0.340396	0.000965	DIFF	1.01769	0.209	NOT	0.702113	0.119	NOT	0.920616	0.348	NOT	1.35395	0.122	NOT
TU1219	2	+	5034436	5034852			AT2G12420.1		1862.29	1.59e-06	1801.03	4.07e-08	1943.67	8.07e-09	1819.61	7.67e-08	1.02346	0.275	NOT	1116.84	1.96e-06	1.61261	0.332	NOT	1389.88	8.02e-07	1.39844	0.256	NOT	0.967105	0.492	NOT	1.0437	0.23	NOT	0.61378	0.203	NOT	0.763834	0.312	NOT
TU1220	2	-	5056889	5057026					1217.78	2.19e-13	587.454	3e-08	466.387	9.77e-08	610.297	9.97e-07	1.99539	0.00648	NOT	451.809	0.00897806	1.30023	0.235	NOT	285.597	3.7e-05	1.63302	0.082	NOT	0.482397	0.00279	DIFF	0.382981	0.000911	DIFF	0.74031	0.353	NOT	0.467964	0.072	NOT
TU1221	2	+	5221759	5222137					6979.99	1.97e-13	6236.4	6.89e-13	5736.22	9.44e-12	7428.05	2.86e-13	0.93968	0.442	NOT	5254.36	4.23e-10	1.1869	0.039	NOT	5092.62	7.49e-12	1.12638	0.221	NOT	0.893468	0.362	NOT	0.821809	0.165	NOT	0.707367	0.0465	DIFF	0.685593	0.0426	DIFF
TU1222	2	-	5335355	5338040			AT2G12960.1		180.363	1.22e-05	286.724	5.75e-07	328.917	1.88e-13	354.067	2.73e-11	0.509404	0.0135	NOT	257.234	7.7e-07	1.11464	0.463	NOT	270.109	5.56e-07	1.21772	0.256	NOT	1.58971	0.233	NOT	1.82364	0.0673	NOT	0.726512	0.107	NOT	0.762875	0.11	NOT
TU1223	2	-	5426132	5427905					199.203	0.00218035	161.778	0.0767871	182.24	0.000320241	282.287	0.000983585	0.705675	0.113	NOT	362.3	1.16e-08	0.44653	0.00106	DIFF	660.021	4.64e-14	0.276112	1.9e-05	DIFF	0.812126	0.101	NOT	0.914846	0.403	NOT	1.28345	0.226	NOT	2.33812	0.00287	DIFF
TU1224	2	-	5463582	5463887					3133.46	1.09e-12	2258.68	2.57e-11	3828.6	2.88e-09	3191.58	2.79e-13	0.98179	0.41	NOT	2488.2	1.75e-08	0.907757	0.26	NOT	3736.44	1.85e-09	1.02467	0.41	NOT	0.720826	0.394	NOT	1.22184	0.234	NOT	0.779614	0.394	NOT	1.17072	0.274	NOT
TU1225	2	+	5485631	5486348					536.743	9.88e-09	529.273	3.88e-06	641.603	2.43e-07	667.373	7.48e-07	0.804262	0.281	NOT	745.023	6.48e-09	0.710412	0.267	NOT	884.256	4.03e-11	0.725585	0.113	NOT	0.986083	0.388	NOT	1.19536	0.199	NOT	1.11635	0.491	NOT	1.32498	0.428	NOT
TU1226	2	-	5503129	5506441			AT2G13272.1,AT2G13273.1		464.977	2.36e-08	535.533	2e-08	416.242	1.26e-07	557.954	2.99e-07	0.833361	0.458	NOT	426.692	4.28e-05	1.25508	0.273	NOT	535.17	3.46e-10	0.777775	0.0834	NOT	1.15174	0.117	NOT	0.895188	0.169	NOT	0.764744	0.327	NOT	0.959165	0.274	NOT
TU1227	2	+	5546368	5548022			AT2G13360.1		1889.99	1.19e-20	1176.4	3.72e-14	1040.55	1.65e-18	2217.64	1.64e-21	0.852253	0.424	NOT	1419.31	2.21e-15	0.828853	0.439	NOT	939.653	1.31e-14	1.10738	0.345	NOT	0.622437	0.0133	DIFF	0.550558	0.00355	DIFF	0.640009	0.0197	DIFF	0.423718	0.0085	DIFF
TU1228	2	-	5592445	5595352			AT2G13422.1		554.659	1.05e-13	642.57	4.36e-15	617.906	6.2e-12	464.26	4.46e-13	1.19472	0.385	NOT	733.548	7.27e-17	0.875975	0.19	NOT	649.672	2.28e-13	0.951105	0.242	NOT	1.1585	0.229	NOT	1.11403	0.417	NOT	1.58004	0.0845	NOT	1.39937	0.266	NOT
TU1229	2	-	5598376	5598507			AT2G13430.1		3295.06	3.49e-13	4789.96	1.34e-13	7356.49	1.57e-19	5213.48	5.25e-18	0.632027	0.209	NOT	6454.66	4e-16	0.742093	0.426	NOT	8235.4	9.42e-25	0.893277	0.221	NOT	1.45368	0.394	NOT	2.23258	0.234	NOT	1.23807	0.475	NOT	1.57964	0.309	NOT
TU1230	2	+	5655805	5656835			AT2G13550.1		3527.51	3.1e-48	668.096	3.89e-21	1510.24	2.63e-34	2981.51	5.57e-41	1.18313	0.212	NOT	918.12	6.99e-18	0.727678	0.236	NOT	1269.31	8.42e-35	1.18981	0.185	NOT	0.189396	5e-14	DIFF	0.428132	2.38e-06	DIFF	0.307938	3.1e-09	DIFF	0.425727	4.61e-07	DIFF
TU1231	2	+	5665645	5666845					2036.98	5.61e-07	2614.62	1.59e-09	3663.66	1.96e-10	2021.54	1.61e-07	1.00764	0.45	NOT	2939.8	8.68e-09	0.889387	0.462	NOT	3324.22	7.39e-08	1.10211	0.412	NOT	1.28358	0.253	NOT	1.79857	0.301	NOT	1.45424	0.352	NOT	1.6444	0.284	NOT
TU1232	2	+	5714024	5714423			AT2G13690.1		1229.73	1.8e-08	1015.9	6.26e-06	959.651	7.01e-08	893.93	4.31e-06	1.37564	0.175	NOT	721.049	2.27e-05	1.40892	0.111	NOT	1447.76	9.81e-09	0.662852	0.442	NOT	0.826116	0.226	NOT	0.780375	0.434	NOT	0.806606	0.169	NOT	1.61955	0.302	NOT
TU1233	2	+	5844812	5845347					1069.03	7.06e-08	1195.98	2.16e-09	797.064	1.54e-10	1097.05	3.59e-11	0.974459	0.234	NOT	812.776	4.18e-08	1.47148	0.4	NOT	1091.4	6.47e-07	0.730313	0.316	NOT	1.11875	0.444	NOT	0.745596	0.309	NOT	0.740874	0.245	NOT	0.99485	0.209	NOT
TU1234	2	-	5875003	5875869					232.554	0.00834962	249.648	0.000799516	187.186	0.0823003	280.489	0.00368364	0.829102	0.234	NOT	399.775	8.9e-11	0.624471	0.073	NOT	252.957	0.0570102	0.739991	0.166	NOT	1.07351	0.41	NOT	0.804914	0.248	NOT	1.42528	0.13	NOT	0.901843	0.36	NOT
TU1235	2	-	5925601	5926399					783.591	0.000179784	693.862	2.1e-08	762.803	3.98e-14	463.132	3.9e-05	1.69194	0.476	NOT	699.654	1.14e-07	0.991722	0.438	NOT	583.507	4.24e-05	1.30727	0.0226	NOT	0.88549	0.383	NOT	0.973471	0.119	NOT	1.5107	0.482	NOT	1.25992	0.252	NOT
TU1236	2	-	5929288	5930473			AT2G14070.1		224.822	0.044845	177.876	0.0660911	194.437	0.0122664	356.648	8.68e-09	0.630375	0.0636	NOT	190.219	0.0743049	0.935112	0.421	NOT	228.916	0.112585	0.849381	0.16	NOT	0.791186	0.404	NOT	0.864849	0.413	NOT	0.533352	0.0255	DIFF	0.641854	0.116	NOT
TU1237	2	-	5936708	5938392					1267.99	5.38e-17	819.358	3.39e-09	790.878	2.05e-14	1411.03	9.15e-17	0.898627	0.196	NOT	652.894	3.53e-26	1.25496	0.343	NOT	1315.48	5.68e-15	0.601209	0.0642	NOT	0.646186	0.0829	NOT	0.623726	0.0795	NOT	0.462707	0.00157	DIFF	0.932284	0.307	NOT
TU1238	2	-	6020893	6022194					523.125	9.06e-06	527.437	2.06e-06	747.605	1.01e-09	464.281	1.36e-09	1.12674	0.451	NOT	683.462	4.14e-11	0.771714	0.298	NOT	540.044	1.01e-06	1.38434	0.236	NOT	1.00824	0.346	NOT	1.42911	0.273	NOT	1.47209	0.152	NOT	1.16318	0.462	NOT
TU1239	2	-	6169709	6173424					436.986	5.77e-09	434.987	3.59e-06	574.932	2.49e-10	479.606	4.82e-07	0.911135	0.487	NOT	418.835	1.15e-05	1.03856	0.228	NOT	633.328	1.68e-09	0.907795	0.063	NOT	0.995425	0.398	NOT	1.31568	0.472	NOT	0.87329	0.169	NOT	1.32052	0.0433	DIFF
TU1240	2	-	6279498	6281088			AT2G14660.1		508.091	7.31e-10	637.384	2.78e-05	484.828	2.71e-07	956.347	2.29e-08	0.531283	0.233	NOT	1152.91	2.63e-07	0.552848	0.0752	NOT	888.303	1.17e-09	0.545791	0.0443	NOT	1.25447	0.321	NOT	0.954215	0.314	NOT	1.20554	0.141	NOT	0.92885	0.295	NOT
TU1241	2	+	6307616	6308138			AT2G14720.1		548.695	9.88e-09	335.113	0.0145446	405.072	9.85e-07	593.814	0.000307316	0.924018	0.0368	NOT	417.006	0.00115205	0.803617	0.425	NOT	521.744	1.02e-06	0.776381	0.123	NOT	0.610745	0.0183	NOT	0.738246	0.0149	DIFF	0.70225	0.43	NOT	0.878632	0.201	NOT
TU1242	2	+	6358346	6359624			AT2G14796.1		651.255	8.09e-11	442.057	8.64e-07	501.986	6.22e-13	511.526	1.23e-09	1.27316	0.221	NOT	399.36	9e-11	1.10691	0.16	NOT	480.574	1.75e-12	1.04456	0.344	NOT	0.678777	0.15	NOT	0.770798	0.222	NOT	0.780723	0.112	NOT	0.939491	0.338	NOT
TU1243	2	+	6413598	6415105			AT2G14910.1		1955.49	5.93e-15	1399.54	2.45e-11	1248.98	7.84e-12	2166.06	4.67e-12	0.902787	0.279	NOT	1154.56	2.9e-13	1.21218	0.268	NOT	943.777	1.12e-11	1.32338	0.21	NOT	0.715698	0.16	NOT	0.638704	0.0529	NOT	0.533023	0.472	NOT	0.435711	0.376	NOT
TU1244	2	+	6498782	6500160			AT2G15020.1		546.112	1.36e-14	304.243	2.5e-08	337.043	8.36e-10	448.75	1.81e-14	1.21696	0.313	NOT	378.963	3.08e-14	0.80283	0.183	NOT	315.586	1.39e-09	1.06799	0.104	NOT	0.557107	0.0366	NOT	0.617168	0.0169	DIFF	0.844486	0.359	NOT	0.703256	0.265	NOT
TU1245	2	+	6514715	6519525	AT2G15042	AT2G15042			535.288	4.42e-22	287.957	1.54e-08	320.169	1.24e-13	435.839	3.04e-22	1.22818	0.161	NOT	309.511	9.87e-08	0.930361	0.178	NOT	353.678	1.07e-08	0.905256	0.103	NOT	0.537948	1.28e-05	DIFF	0.598125	0.00168	DIFF	0.71015	0.00666	DIFF	0.811488	0.19	NOT
TU1246	2	-	6525467	6526548			AT2G15050.1		712.044	8.96e-10	515.341	2.43e-06	765.291	2.77e-17	668.913	9.13e-10	1.06448	0.493	NOT	602.028	6.57e-08	0.856008	0.452	NOT	769.276	3.73e-09	0.99482	0.22	NOT	0.723749	0.299	NOT	1.07478	0.145	NOT	0.900009	0.265	NOT	1.15004	0.397	NOT
TU1247	2	-	6549312	6550832			AT2G15090.1		769.951	2.33e-11	464.776	1.39e-08	535.082	1.55e-11	821.685	8.85e-15	0.937039	0.246	NOT	279.361	4.9e-10	1.66371	0.176	NOT	529.402	7.34e-08	1.01073	0.36	NOT	0.603644	0.088	NOT	0.694956	0.136	NOT	0.339986	0.00181	DIFF	0.644288	0.064	DIFF
TU1248	2	+	6571449	6571751					9107.02	1.76e-21	3171.14	1.24e-17	4593.12	1.53e-18	8938.67	1.58e-21	1.01883	0.487	NOT	4128.75	1.99e-18	0.768063	0.285	NOT	5059.31	2.14e-18	0.907855	0.4	NOT	0.348208	0.00296	DIFF	0.504349	0.00474	DIFF	0.461898	0.000697	DIFF	0.566003	0.00569	DIFF
TU1249	2	-	6632617	6633529					302.202	0.000167836	375.668	3.15e-09	287.902	3.06e-05	178.078	0.0858059	1.69702	0.0679	NOT	260.813	0.00222223	1.44037	0.187	NOT	215.352	0.00756764	1.33689	0.438	NOT	1.2431	0.189	NOT	0.952681	0.273	NOT	1.4646	0.0612	NOT	1.20931	0.232	NOT
TU1250	2	-	6646086	6646694			AT2G15270.1		444.442	2.54e-09	475.785	2.79e-09	482.812	2.27e-15	497.651	4.4e-08	0.89308	0.469	NOT	570.478	3.3e-09	0.834011	0.373	NOT	468.404	5.91e-06	1.03076	0.476	NOT	1.07052	0.446	NOT	1.08633	0.281	NOT	1.14634	0.334	NOT	0.94123	0.276	NOT
TU1251	2	-	6651404	6652573	AT2G15292	AT2G15292			712.301	1.14e-11	608.468	5.63e-12	790.843	8.19e-11	545.235	3.16e-06	1.30641	0.217	NOT	553.186	6.54e-09	1.09993	0.176	NOT	614.342	1.43e-09	1.2873	0.319	NOT	0.854229	0.373	NOT	1.11027	0.363	NOT	1.01458	0.418	NOT	1.12675	0.155	NOT
TU1252	2	-	6656507	6659052			AT2G15300.1		309.897	1.95e-09	403.205	5.2e-12	393.58	9.47e-12	259.94	2.02e-06	1.19219	0.0606	NOT	391.818	4.18e-13	1.02906	0.478	NOT	356.066	9.46e-10	1.10536	0.0816	NOT	1.30109	0.331	NOT	1.27003	0.103	NOT	1.50734	0.0357	DIFF	1.3698	0.141	NOT
TU1253	2	+	6673611	6675102			AT2G15320.1		578.519	2.02e-12	540.256	4.66e-13	479.176	4.35e-10	335.298	1.27e-08	1.72539	0.00583	NOT	629.564	1.49e-17	0.858143	0.36	NOT	410.015	1.26e-09	1.16868	0.495	NOT	0.93386	0.366	NOT	0.82828	0.0603	NOT	1.87763	0.00795	DIFF	1.22284	0.187	NOT
TU1254	2	+	6750863	6751861			AT2G15440.1		552.827	2.87e-11	414.372	1.16e-05	268	0.000719748	395.398	3.7e-05	1.39815	0.253	NOT	365.412	0.00138975	1.13399	0.431	NOT	424.056	5.26e-09	0.631992	0.107	NOT	0.749551	0.151	NOT	0.484781	0.043	NOT	0.924162	0.324	NOT	1.07248	0.442	NOT
TU1255	2	-	6805062	6805308			AT2G15580.1		2047.94	2.53e-10	1641.51	1.94e-09	1464.79	5.1e-10	2515.61	3.89e-08	0.814093	0.425	NOT	1800.52	2.09e-09	0.911687	0.425	NOT	1693.96	5.32e-10	0.864713	0.425	NOT	0.801542	0.115	NOT	0.71525	0.05	NOT	0.715739	0.224	NOT	0.673379	0.127	NOT
TU1256	2	-	6815689	6819739			AT2G15620.1		352.356	6.34e-10	458.72	6.2e-11	264.118	0.000132298	377.393	1.05e-09	0.933658	0.363	NOT	591.757	4.66e-18	0.775183	0.119	NOT	297.422	2.67e-06	0.888024	0.344	NOT	1.30187	0.413	NOT	0.749577	0.0387	NOT	1.56801	0.0446	DIFF	0.788096	0.164	NOT
TU1257	2	+	6838854	6841793			AT2G15690.1,AT2G15695.1		253.494	2.91e-05	243.611	7.23e-08	309.423	7.81e-15	246.868	1.17e-07	1.02684	0.369	NOT	264.959	4.98e-06	0.919429	0.223	NOT	223.112	1.82e-06	1.38685	0.0551	NOT	0.961013	0.269	NOT	1.22063	0.17	NOT	1.07328	0.313	NOT	0.90377	0.163	NOT
TU1258	2	-	6891131	6893376			AT2G15810.1		139.556	0.00133534	711.817	1.91e-13	581.827	5.7e-24	232.923	0.00357466	0.599151	0.0995	NOT	1827.97	2.4e-26	0.389403	3.21e-05	DIFF	2192.64	2.1e-36	0.265355	3.4e-11	DIFF	5.10058	1.81e-08	DIFF	4.16913	5.3e-08	DIFF	7.84796	1.51e-14	DIFF	9.41358	0	DIFF
TU1259	2	-	6897500	6898377	AT2G15820	AT2G15820			1102.55	5.63e-13	1352.45	4.54e-19	1387.15	3.12e-17	1005.11	8.02e-10	1.09694	0.296	NOT	887.207	1.37e-11	1.52439	0.191	NOT	1052.57	2.08e-17	1.31787	0.247	NOT	1.22666	0.305	NOT	1.25813	0.219	NOT	0.882696	0.491	NOT	1.04722	0.267	NOT
TU1260	2	+	6928068	6929050			AT2G15890.1		608.776	2.09e-11	221.97	0.0124404	283.821	0.00046778	572.203	1.65e-13	1.06392	0.468	NOT	351.44	2.6e-05	0.631601	0.133	NOT	338.499	2.49e-05	0.838469	0.144	NOT	0.364617	0.00195	DIFF	0.466216	0.00264	DIFF	0.614188	0.0101	DIFF	0.591572	0.00527	DIFF
TU1261	2	-	6954356	6954825			AT2G15960.1		2654.55	3.6e-11	1562.8	1.06e-07	1370.33	1.55e-07	3048.96	2.02e-12	0.870641	0.22	NOT	2491.44	6.3e-11	0.627268	0.262	NOT	1891	1.36e-11	0.724659	0.109	NOT	0.588725	0.218	NOT	0.516219	0.0439	NOT	0.817144	0.196	NOT	0.620211	0.126	NOT
TU1262	2	+	6954776	6954926					2064.2	6.07e-19	1489.4	5.88e-19	868.818	7.07e-13	1956.78	6.02e-21	1.0549	0.203	NOT	3155.56	4.28e-21	0.471992	0.0952	NOT	3142.43	1.44e-20	0.27648	0.0956	NOT	0.721539	0.209	NOT	0.420898	0.186	NOT	1.61263	0.402	NOT	1.60592	0.386	NOT
TU1263	2	-	6957811	6958239			AT2G15970.1		1043.37	4.29e-14	1135.46	8.7e-12	733.793	4.12e-11	1317.71	4.83e-21	0.791805	0.5	NOT	1275.59	5.26e-14	0.890145	0.302	NOT	557.531	1.91e-08	1.31615	0.397	NOT	1.08826	0.286	NOT	0.703291	0.0614	NOT	0.968035	0.478	NOT	0.423106	0.0577	DIFF
TU1264	2	-	6978623	6980553	AT2G16018	AT2G16018	AT2G16019.1,AT2G16020.1		832.429	1.55e-05	1101.32	4.97e-07	1416.74	2.04e-11	1435.61	4.11e-06	0.579843	0.352	NOT	1507.85	5.17e-09	0.730391	0.295	NOT	1508.94	5e-08	0.938898	0.387	NOT	1.32302	0.324	NOT	1.70193	0.168	NOT	1.05032	0.437	NOT	1.05108	0.402	NOT
TU1265	2	-	7050038	7050462					929.155	1.59e-06	1038.37	1.59e-12	802.48	3.83e-10	876.798	0.000281823	1.05971	0.168	NOT	684.242	1.74e-18	1.51755	0.431	NOT	666.984	2.61e-09	1.20315	0.258	NOT	1.11754	0.167	NOT	0.863666	0.0667	NOT	0.780387	0.255	NOT	0.760704	0.493	NOT
TU1266	2	-	7059128	7059804			AT2G16280.1		570.895	6.37e-15	577.207	9.56e-15	395.418	0.000243687	679.55	2.11e-16	0.840107	0.401	NOT	423.239	1.18e-05	1.36379	0.221	NOT	443.301	2.21e-07	0.891985	0.28	NOT	1.01106	0.345	NOT	0.692628	0.0164	DIFF	0.622822	0.141	NOT	0.652345	0.108	NOT
TU1267	2	-	7081984	7083602			AT2G16365.1		840.501	5.07e-24	830.703	6.16e-24	933.135	5.33e-19	917.045	1.67e-27	0.916532	0.353	NOT	867.056	6.51e-22	0.958073	0.415	NOT	1143.48	2.01e-29	0.816048	0.242	NOT	0.988343	0.424	NOT	1.11021	0.234	NOT	0.945489	0.384	NOT	1.24692	0.121	NOT
TU1268	2	-	7086743	7087077					13146.1	6.19e-11	4759.48	9.17e-05	1473.61	0.00296882	19019.4	1.04e-14	0.691194	0.0608	NOT	10180.7	1.46e-06	0.4675	0.0907	NOT	3693.76	8.35e-05	0.398946	0.177	NOT	0.362045	0.00422	DIFF	0.112095	0.00145	DIFF	0.53528	0.0091	DIFF	0.19421	0.00107	DIFF
TU1269	2	+	7108321	7109463			AT2G16400.1		800.649	1.06e-15	639.13	1.75e-14	709.268	1.32e-16	772.227	7.8e-18	1.03681	0.274	NOT	395.563	5.38e-07	1.61575	0.0669	NOT	484.863	1.57e-09	1.46282	0.235	NOT	0.798265	0.235	NOT	0.885866	0.261	NOT	0.512237	0.0612	NOT	0.627876	0.196	NOT
TU1270	2	+	7150478	7151131			AT2G16485.1		600.052	1.13e-12	533.263	4.36e-12	503.508	4.81e-06	614.538	1.26e-09	0.976428	0.349	NOT	309.823	5.62e-05	1.72119	0.114	NOT	363.76	3.58e-05	1.38418	0.289	NOT	0.888695	0.189	NOT	0.839107	0.0891	NOT	0.504156	0.0401	DIFF	0.591924	0.052	DIFF
TU1271	2	-	7207897	7208623			AT2G16600.1		3079.52	3.91e-31	3229.66	9.59e-24	2504.23	1.07e-30	3042.9	1.49e-25	1.01203	0.393	NOT	2216.15	6.59e-21	1.45733	0.142	NOT	2075.85	5.55e-17	1.20636	0.376	NOT	1.04875	0.347	NOT	0.813188	0.116	NOT	0.728302	0.0533	NOT	0.682195	0.0811	NOT
TU1272	2	+	7311223	7312029			AT2G16860.1		3712.61	2.51e-08	5880.54	3.54e-08	4472.21	2.91e-08	4130.68	9.17e-06	0.898789	0.412	NOT	6370.91	3.86e-07	0.92303	0.462	NOT	4158.76	5.76e-09	1.07537	0.487	NOT	1.58394	0.295	NOT	1.2046	0.45	NOT	1.54234	0.295	NOT	1.0068	0.45	NOT
TU1273	2	+	7326950	7327627					444.77	2.61e-05	541.338	7.39e-12	598.955	3.63e-11	380.788	0.00143185	1.16803	0.459	NOT	142.928	0.0140049	3.78749	0.00291	NOT	370.869	0.000949716	1.615	0.0297	NOT	1.21712	0.0555	NOT	1.34666	0.0283	DIFF	0.375348	0.124	NOT	0.973951	0.309	NOT
TU1274	2	+	7353633	7354431			AT2G16940.1		809.843	4.8e-07	776.585	1.81e-09	685.794	3.73e-07	786.79	6.88e-14	1.0293	0.287	NOT	769.136	2.88e-07	1.00968	0.359	NOT	452.736	2.7e-06	1.51478	0.274	NOT	0.958933	0.413	NOT	0.846823	0.205	NOT	0.977562	0.144	NOT	0.575422	0.0147	DIFF
TU1275	2	-	7406972	7407326			AT2G17030.1		2281.26	0.00036032	1794.45	7.01e-08	2310.53	7.19e-06	1386.49	0.00179402	1.64535	0.406	NOT	1954.55	3.8e-17	0.918089	0.234	NOT	1996.74	7.83e-06	1.15715	0.38	NOT	0.786605	0.197	NOT	1.01283	0.259	NOT	1.40971	0.0675	NOT	1.44014	0.378	NOT
TU1276	2	-	7408815	7410297			AT2G17033.1		497.87	1.36e-13	481.12	8.2e-12	326.94	0.000497732	440.334	3.8e-10	1.13066	0.382	NOT	419.697	3.85e-06	1.14635	0.121	NOT	282.473	0.000240442	1.15742	0.334	NOT	0.966357	0.499	NOT	0.656677	0.0217	DIFF	0.953133	0.142	NOT	0.641497	0.0441	DIFF
TU1277	2	+	7473980	7477390			AT2G17150.1		275.165	8.21e-14	222.234	0.000129841	247.305	1.51e-05	218.462	4.8e-09	1.25956	0.135	NOT	237.637	2.4e-06	0.935183	0.48	NOT	230.372	1.84e-07	1.0735	0.445	NOT	0.807639	0.0493	NOT	0.898752	0.113	NOT	1.08777	0.29	NOT	1.05452	0.488	NOT
TU1278	2	+	7484093	7485646			AT2G17180.1,AT2G17190.1		259.473	8.95e-06	312.312	7.6e-08	256.725	2e-05	352.348	1.36e-07	0.736411	0.408	NOT	470.23	7.8e-15	0.664169	0.0958	NOT	241.522	0.000230042	1.06295	0.2	NOT	1.20364	0.248	NOT	0.989409	0.151	NOT	1.33456	0.048	DIFF	0.685464	0.331	NOT
TU1279	2	-	7525644	7526438			AT2G17290.1		961.577	1.01e-08	703.939	4.18e-05	695.918	3.88e-06	1185.62	1.27e-09	0.811033	0.333	NOT	932.285	6.75e-07	0.755068	0.14	NOT	544.554	1.54e-08	1.27796	0.386	NOT	0.732067	0.205	NOT	0.723726	0.236	NOT	0.786327	0.448	NOT	0.459299	0.0908	NOT
TU1280	2	+	7527626	7527980					444.353	0.027811	921.23	5.46e-06	2108.21	6.31e-07	296.44	0.0539221	1.49896	0.232	NOT	815.653	0.00098463	1.12944	0.3	NOT	1825.71	9.16e-16	1.15473	0.202	NOT	2.07319	0.118	NOT	4.74445	0.139	NOT	2.75149	0.105	NOT	6.15878	0.000543	DIFF
TU1281	2	-	7554529	7555327			AT2G17360.1		1812.91	1.85e-13	1661.53	1.19e-15	1357.28	7.69e-16	2640.08	9.98e-12	0.686688	0.199	NOT	1397.49	4.6e-12	1.18894	0.159	NOT	1476.36	6.5e-14	0.919342	0.393	NOT	0.916499	0.412	NOT	0.748675	0.45	NOT	0.529336	0.133	NOT	0.55921	0.271	NOT
TU1282	2	-	7563065	7564849			AT2G17390.1		517.888	1.61e-07	552.752	6.44e-09	346.081	7.54e-08	717.216	5.11e-11	0.722081	0.117	NOT	557.86	1.08e-08	0.990844	0.367	NOT	379.109	7.16e-05	0.91288	0.387	NOT	1.06732	0.353	NOT	0.668255	0.0306	DIFF	0.777813	0.0989	NOT	0.528584	0.00239	DIFF
TU1283	2	+	7605314	7606201					1608.66	2.71e-05	1072.04	1.92e-09	713.054	4.63e-06	1164.72	5.09e-10	1.38116	0.135	NOT	1030.03	1.98e-10	1.04079	0.352	NOT	883.533	1.47e-08	0.807049	0.116	NOT	0.666418	0.432	NOT	0.44326	0.205	NOT	0.884358	0.209	NOT	0.75858	0.201	NOT
TU1284	2	+	7763967	7764989			AT2G17840.1		367.195	7.01e-05	410.437	3.33e-06	240.233	0.00208897	333.245	0.000265625	1.10188	0.398	NOT	464.387	6.89e-11	0.883825	0.474	NOT	296.585	0.000847642	0.809997	0.301	NOT	1.11776	0.203	NOT	0.654238	0.235	NOT	1.39353	0.343	NOT	0.889991	0.287	NOT
TU1285	2	+	7771375	7772261			AT2G17870.1		1077.45	3.73e-09	2189.11	2.89e-12	1518.36	3.23e-13	1402.57	2.49e-11	0.768197	0.429	NOT	1312.26	6.28e-13	1.6682	0.268	NOT	1516.54	1.4e-15	1.0012	0.172	NOT	2.03175	0.177	NOT	1.40922	0.447	NOT	0.935611	0.457	NOT	1.08126	0.26	NOT
TU1286	2	-	7828835	7829037			AT2G17972.1		18666.1	2.23e-09	14227.8	6.09e-10	25009.5	1.93e-13	18212.9	5.02e-11	1.02488	0.343	NOT	15991.7	1.99e-17	0.889699	0.477	NOT	27111.1	1.41e-10	0.922482	0.477	NOT	0.762227	0.301	NOT	1.33984	0.163	NOT	0.878042	0.477	NOT	1.48857	0.322	NOT
TU1287	2	-	7844206	7846490			AT2G18020.1		974.607	7.35e-10	996.338	3.01e-08	838.413	4.46e-13	1515.79	4.35e-10	0.64297	0.0787	NOT	1199.88	3.49e-07	0.830365	0.314	NOT	639.718	2.95e-06	1.3106	0.174	NOT	1.0223	0.408	NOT	0.860258	0.432	NOT	0.791587	0.0583	NOT	0.422036	0.00654	DIFF
TU1288	2	-	7852940	7853913			AT2G18050.1		1056.52	2.82e-16	420.367	1.83e-09	430.877	4.08e-10	575.082	5.07e-10	1.83716	0.0596	NOT	382.229	2.72e-05	1.09978	0.134	NOT	245.282	0.00020273	1.75666	0.117	NOT	0.397879	0.00999	DIFF	0.407827	0.00335	DIFF	0.664651	0.0601	NOT	0.426517	0.0176	DIFF
TU1289	2	-	7881383	7882055					5945.72	1.81e-20	3724.17	4.81e-15	4366.82	1.39e-20	3764.65	4.52e-17	1.57936	0.184	NOT	3469.06	1.19e-13	1.07354	0.4	NOT	3187.22	1.51e-14	1.3701	0.379	NOT	0.626361	0.112	NOT	0.734448	0.288	NOT	0.921483	0.306	NOT	0.846618	0.453	NOT
TU1290	2	+	7905395	7906198			AT2G18160.1,AT2G18162.1		740.842	1.76e-16	715.504	9.54e-24	687.99	7.31e-23	1017.82	7.19e-20	0.727871	0.0457	NOT	664.51	1.02e-26	1.07674	0.425	NOT	710.562	1.77e-21	0.968234	0.326	NOT	0.965798	0.224	NOT	0.92866	0.474	NOT	0.652876	0.086	NOT	0.698121	0.0918	NOT
TU1291	2	+	7959906	7960351			AT2G18300.1		687.719	3.05e-09	516.957	7.96e-09	268.85	0.0162486	746.255	2.36e-10	0.92156	0.459	NOT	311.132	0.00280648	1.66154	0.00368	NOT	310.673	0.000934202	0.865379	0.399	NOT	0.751698	0.343	NOT	0.39093	0.0114	DIFF	0.416925	0.00294	DIFF	0.416309	0.00511	DIFF
TU1292	2	-	8001984	8002438	AT2G18440	AT2G18440			1947.45	4.03e-13	6706.01	6.69e-14	7109.8	4e-13	933.829	1.23e-07	2.08545	0.0522	NOT	5061.83	5.23e-11	1.32482	0.263	NOT	3431.03	2.19e-12	2.07221	0.151	NOT	3.44348	0.0283	NOT	3.65083	0.0467	NOT	5.42051	0.0117	DIFF	3.67415	0.0122	DIFF
TU1293	2	+	8010491	8011074			AT2G18465.1		418.671	1.08e-06	410.635	8.64e-07	308.384	0.000643502	487.97	0.000186328	0.857985	0.424	NOT	526.093	1.38e-14	0.780537	0.395	NOT	337.786	9.09e-05	0.912957	0.203	NOT	0.980806	0.418	NOT	0.736578	0.115	NOT	1.07813	0.444	NOT	0.692227	0.392	NOT
TU1294	2	+	8038220	8039208			AT2G18510.1		442.512	4.78e-06	767.07	8.4e-19	748.18	1.98e-17	471.335	3.7e-09	0.938848	0.372	NOT	944.73	1.79e-16	0.811946	0.271	NOT	494.225	2.98e-14	1.51384	0.409	NOT	1.73344	0.0758	NOT	1.69076	0.219	NOT	2.00437	0.036	DIFF	1.04856	0.365	NOT
TU1295	2	+	8049505	8050291			AT2G18540.1		7394.9	2.55e-63	4942.52	4.31e-56	6751.75	1e-52	6286.79	3.45e-48	1.17626	0.109	NOT	3872.72	1.44e-47	1.27624	0.0211	NOT	5694.5	1.24e-58	1.18566	0.362	NOT	0.668369	0.0448	NOT	0.913028	0.232	NOT	0.616009	0.0109	DIFF	0.905788	0.49	NOT
TU1296	2	-	8066462	8067801			AT2G18560.1		487.885	4.69e-08	506.962	1.62e-07	262.347	0.000329245	452.076	7.38e-10	1.07921	0.466	NOT	337.606	0.00031254	1.50164	0.204	NOT	356.114	0.000189483	0.736694	0.213	NOT	1.0391	0.38	NOT	0.537723	0.0179	DIFF	0.74679	0.104	NOT	0.78773	0.0863	NOT
TU1297	2	-	8070426	8072886			AT2G18570.1		480.843	3.4e-14	467.1	8.87e-09	245.165	0.00174591	432.803	1.1e-08	1.111	0.421	NOT	608.456	1.34e-09	0.767681	0.443	NOT	359.186	3.85e-05	0.682557	0.159	NOT	0.971419	0.35	NOT	0.509865	0.0214	DIFF	1.40585	0.48	NOT	0.829906	0.164	NOT
TU1298	2	-	8088808	8089400			AT2G18630.1		432.142	1.03e-14	322.35	1.49e-05	279.217	0.000137233	381.249	1.46e-09	1.13349	0.364	NOT	543.349	5.81e-11	0.593265	0.139	NOT	378.468	9.01e-06	0.737756	0.292	NOT	0.745935	0.312	NOT	0.646123	0.155	NOT	1.42518	0.13	NOT	0.992706	0.484	NOT
TU1299	2	+	8140823	8141370					1122.43	4.22e-10	1393.67	9.01e-18	1233.79	3.18e-14	728.739	3.43e-12	1.54024	0.243	NOT	1260.25	3.23e-14	1.10587	0.334	NOT	1076.05	1.13e-12	1.14659	0.444	NOT	1.24165	0.323	NOT	1.09921	0.27	NOT	1.72936	0.183	NOT	1.47659	0.0778	NOT
TU1300	2	-	8150899	8151495			AT2G18790.1		704.537	4.11e-14	599.174	1.3e-06	334.701	0.00209179	836.161	5e-12	0.842585	0.144	NOT	471.394	0.000904395	1.27107	0.245	NOT	495.522	5.25e-09	0.675451	0.0566	NOT	0.850451	0.167	NOT	0.475065	0.0142	DIFF	0.56376	0.00393	DIFF	0.592616	0.0198	DIFF
TU1301	2	+	8201008	8203469			AT2G18910.1,AT2G18915.1		447.68	6.11e-15	497.978	8.91e-15	373.101	6.8e-10	436.259	8.96e-12	1.02618	0.41	NOT	451.474	1.06e-13	1.103	0.478	NOT	372.264	1.91e-09	1.00225	0.339	NOT	1.11235	0.306	NOT	0.83341	0.302	NOT	1.03488	0.386	NOT	0.85331	0.376	NOT
TU1302	2	-	8230647	8234948			AT2G18960.1		1482.76	3.54e-18	1081.53	6.46e-14	661.737	3.17e-12	1482.61	8.49e-18	1.0001	0.299	NOT	966.952	7.81e-13	1.11849	0.372	NOT	575.643	4.42e-09	1.14956	0.298	NOT	0.729403	0.204	NOT	0.446287	0.0184	DIFF	0.652196	0.165	NOT	0.388263	0.0205	DIFF
TU1303	2	-	8274980	8275526					3882.15	8.2e-12	2326.5	6.06e-12	2861.98	4.12e-06	3233.53	2.47e-10	1.20059	0.368	NOT	2007.71	6.45e-05	1.15878	0.316	NOT	3202.81	5.94e-10	0.893584	0.191	NOT	0.599281	0.168	NOT	0.737215	0.105	NOT	0.620903	0.176	NOT	0.9905	0.448	NOT
TU1304	2	+	8360395	8362997					922.829	6.53e-10	849.702	1.05e-13	853.058	3.35e-19	943.938	1.31e-13	0.977637	0.496	NOT	798.501	2.82e-09	1.06412	0.342	NOT	781.222	2.14e-12	1.09195	0.464	NOT	0.920758	0.278	NOT	0.924394	0.432	NOT	0.845925	0.178	NOT	0.82762	0.334	NOT
TU1305	2	+	8376927	8378379			AT2G19310.1		768.077	5.42e-15	2764.44	1.7e-31	1687.5	8.35e-22	810.062	1.74e-10	0.948171	0.497	NOT	3035.37	6.33e-26	0.910742	0.458	NOT	1972.11	2.36e-28	0.855682	0.0935	NOT	3.59917	2.96e-05	DIFF	2.19705	0.0108	DIFF	3.74708	6.6e-05	DIFF	2.43452	9.55e-06	DIFF
TU1306	2	+	8413189	8413519			AT2G19410.1		1288.65	4.02e-13	783.95	3.33e-06	1478.39	0.000165691	1106.18	0.000218108	1.16496	0.108	NOT	789.758	7.9e-05	0.992646	0.346	NOT	671.95	0.000198515	2.20015	0.186	NOT	0.60835	0.044	NOT	1.14724	0.336	NOT	0.713951	0.25	NOT	0.607451	0.428	NOT
TU1307	2	-	8447041	8448244			AT2G19480.1		917.302	9.47e-08	1105.48	1.26e-10	744.565	2.82e-07	1182.36	2.47e-12	0.775823	0.168	NOT	918.047	4.65e-10	1.20416	0.367	NOT	832.852	6.93e-09	0.893994	0.202	NOT	1.20514	0.283	NOT	0.81169	0.278	NOT	0.776453	0.207	NOT	0.704398	0.149	NOT
TU1308	2	+	8477689	8478665	AT2G19572	AT2G19572	AT2G19570.1		660.361	1.1e-13	568.188	4.16e-11	575.809	3.77e-12	619.965	2.79e-13	1.06516	0.276	NOT	1009.07	6.27e-16	0.563081	0.0552	NOT	658.878	1.25e-12	0.873924	0.487	NOT	0.86042	0.403	NOT	0.871961	0.492	NOT	1.62762	0.0292	DIFF	1.06277	0.308	NOT
TU1309	2	-	8519472	8520091			AT2G19730.1		1271.47	1.66e-09	1032.99	9.86e-07	1160.05	4.27e-08	1762.44	3.44e-08	0.721426	0.102	NOT	1123.3	6.62e-05	0.919603	0.225	NOT	897.966	9.29e-06	1.29186	0.456	NOT	0.812438	0.25	NOT	0.912369	0.261	NOT	0.637355	0.0779	NOT	0.509502	0.0177	DIFF
TU1310	2	-	8521143	8521579			AT2G19740.1		2200.09	5.48e-08	1548.84	2.7e-08	1467.88	4.93e-10	3886.45	4.02e-11	0.566092	0.156	NOT	1650.89	5.64e-10	0.938185	0.283	NOT	2034.41	3.95e-12	0.721526	0.224	NOT	0.703989	0.436	NOT	0.667191	0.418	NOT	0.424781	0.275	NOT	0.523462	0.421	NOT
TU1311	2	-	8535135	8535617			AT2G19790.1		668.495	1.58e-10	368.286	3.73e-07	730.358	5.26e-09	747.255	2.1e-07	0.894601	0.413	NOT	549.786	5.17e-07	0.669872	0.195	NOT	756.801	5.36e-06	0.96506	0.17	NOT	0.550918	0.00779	DIFF	1.09254	0.107	NOT	0.735741	0.126	NOT	1.01277	0.472	NOT
TU1312	2	-	8583106	8584908			AT2G19870.1		389.956	5.24e-11	302.637	1.88e-07	340.388	5.27e-08	343.123	1.32e-08	1.13649	0.292	NOT	366.451	1.38e-05	0.825859	0.456	NOT	351.539	1.08e-06	0.968279	0.483	NOT	0.77608	0.179	NOT	0.872888	0.287	NOT	1.06799	0.336	NOT	1.02453	0.487	NOT
TU1313	2	+	8597713	8598600					607.031	1.42e-11	499.536	5.8e-07	538.781	0.000313279	648.071	3.32e-14	0.936674	0.33	NOT	456.533	0.000298964	1.09419	0.312	NOT	409.144	0.000133834	1.31685	0.491	NOT	0.822917	0.103	NOT	0.887568	0.164	NOT	0.704449	0.107	NOT	0.631326	0.0379	DIFF
TU1314	2	-	8602739	8602844					1562.22	1.33e-09	1126.85	0.00448881	3343.37	2.89e-09	2083.29	7.55e-07	0.749881	0.314	NOT	920.923	0.00074012	1.22361	0.412	NOT	4051.32	4.88e-10	0.825254	0.226	NOT	0.721313	0.201	NOT	2.14014	0.155	NOT	0.442052	0.0721	NOT	1.94467	0.0726	NOT
TU1315	2	+	8619075	8620000			AT2G19930.1		437.728	1.27e-09	314.006	2.79e-14	513.729	2.62e-17	318.931	6.21e-08	1.37248	0.13	NOT	296.798	5.25e-09	1.05798	0.379	NOT	342.277	7.26e-09	1.50092	0.0286	NOT	0.717354	0.071	NOT	1.17363	0.188	NOT	0.930603	0.405	NOT	1.0732	0.486	NOT
TU1316	2	-	8699777	8700295			AT2G20140.1		387.67	0.000179784	385.437	6.39e-06	483.235	1.41e-07	535.796	1.22e-10	0.72354	0.126	NOT	242.853	0.000231271	1.58712	0.255	NOT	504.817	9.4e-10	0.957248	0.333	NOT	0.99424	0.263	NOT	1.24651	0.302	NOT	0.453256	0.00424	DIFF	0.942181	0.183	NOT
TU1317	2	-	8743771	8744220			AT2G20260.1		1795.26	2.76e-10	2591.34	6.94e-09	1438.64	3.36e-07	2520.45	2.87e-09	0.712278	0.333	NOT	2993.29	6.99e-11	0.865716	0.271	NOT	2261.34	2.47e-11	0.636189	0.217	NOT	1.44343	0.276	NOT	0.801355	0.344	NOT	1.1876	0.219	NOT	0.897197	0.464	NOT
TU1318	2	+	8746435	8748043			AT2G20280.1		1208.46	5.36e-11	1110.46	2.21e-09	871.545	1.59e-13	1238.2	2.63e-09	0.975981	0.43	NOT	1134.45	4.09e-13	0.978853	0.285	NOT	1114.98	6.88e-10	0.781669	0.279	NOT	0.918905	0.376	NOT	0.721203	0.493	NOT	0.916209	0.313	NOT	0.900485	0.338	NOT
TU1319	2	-	8795836	8797288			AT2G20360.1,AT2G20362.1		321.624	9.56e-05	257.342	0.0015656	206.047	1.36e-05	192.241	0.000624543	1.67303	0.308	NOT	531.585	1.03e-12	0.484103	0.000518	DIFF	298.95	1.88e-05	0.689236	0.189	NOT	0.800133	0.196	NOT	0.640646	0.0903	NOT	2.7652	0.00148	DIFF	1.55508	0.448	NOT
TU1320	2	-	8813480	8815062			AT2G20420.1		1932.83	1.14e-11	1116.53	6.21e-08	1145.67	6.11e-09	2661.09	1.76e-18	0.72633	0.16	NOT	1758.07	2.15e-14	0.635088	0.075	NOT	973.716	4.3e-06	1.1766	0.455	NOT	0.577666	0.0511	NOT	0.592742	0.00835	DIFF	0.660658	0.0523	NOT	0.365909	0.000493	DIFF
TU1321	2	-	8838770	8839022			AT2G20490.1		485.156	3.94e-10	612.994	1.27e-05	901.469	1.32e-10	371.506	6e-05	1.30592	0.248	NOT	661.824	3.06e-07	0.926219	0.495	NOT	860.991	2.99e-10	1.04701	0.48	NOT	1.2635	0.419	NOT	1.8581	0.323	NOT	1.78146	0.181	NOT	2.31757	0.111	NOT
TU1322	2	-	8839750	8840003			AT2G20490.1		307.422	0.000167836	857.232	6.67e-10	852.126	5.26e-06	236.503	0.0214938	1.29987	0.256	NOT	596.91	0.0306501	1.43612	0.0417	NOT	516.087	3.95e-09	1.65113	0.229	NOT	2.78845	0.0111	DIFF	2.77184	0.163	NOT	2.5239	0.126	NOT	2.18216	0.000704	DIFF
TU1323	2	-	8850284	8850908			AT2G20530.1		400.525	9.3e-07	496.161	5.45e-11	546.839	5.1e-10	563.257	1.54e-08	0.711087	0.338	NOT	626.781	1.02e-06	0.791602	0.421	NOT	511.988	2.09e-05	1.06807	0.1	NOT	1.23878	0.459	NOT	1.36531	0.252	NOT	1.11278	0.468	NOT	0.908978	0.139	NOT
TU1324	2	+	8855194	8855876			AT2G20560.1		336.533	1.44e-06	1848.05	2.94e-15	845.217	6.67e-15	445.95	1.13e-06	0.754643	0.323	NOT	2733.76	4.18e-26	0.67601	0.0285	NOT	1238.31	1.31e-12	0.682557	0.161	NOT	5.49144	0.000579	DIFF	2.51154	0.0263	DIFF	6.13019	3.14e-08	DIFF	2.77679	0.000315	DIFF
TU1325	2	+	8904675	8905649			AT2G20630.1		789.357	9.46e-12	425.639	3.96e-05	418.512	5.77e-05	776.565	2.79e-13	1.01647	0.408	NOT	330.191	9.46e-07	1.28907	0.029	NOT	344.734	0.000449102	1.21401	0.445	NOT	0.539222	0.0167	DIFF	0.530194	0.00497	DIFF	0.425194	1.1e-05	DIFF	0.443922	0.000237	DIFF
TU1326	2	+	8908873	8911520	AT2G20635	AT2G20635			857.583	1.58e-08	502.505	3.06e-09	965.424	5.09e-11	927.068	7.64e-09	0.925049	0.386	NOT	511.618	1.54e-08	0.982188	0.487	NOT	824.994	8.15e-14	1.17022	0.476	NOT	0.585955	0.0233	NOT	1.12575	0.451	NOT	0.551867	0.0557	NOT	0.889896	0.466	NOT
TU1327	2	+	8919009	8920239			AT2G20670.1		972.326	7.53e-12	1130.32	9.54e-14	416.098	3.64e-06	1640.82	4.61e-19	0.592585	0.099	NOT	783.612	1.21e-09	1.44245	0.203	NOT	453.898	9.08e-07	0.916721	0.248	NOT	1.16249	0.301	NOT	0.427941	0.0115	DIFF	0.477573	0.00434	DIFF	0.276629	0.00151	DIFF
TU1328	2	-	8937922	8938644					3207.39	1.05e-23	2808.68	1e-27	6405.14	1.57e-39	2191.53	1.17e-20	1.46354	0.0716	NOT	1917.77	4.07e-20	1.46456	0.107	NOT	8718	1.53e-42	0.734703	0.244	NOT	0.87569	0.341	NOT	1.99699	0.00955	DIFF	0.875083	0.486	NOT	3.97804	4.96e-05	DIFF
TU1329	2	-	8939731	8940120				TU1330	18581.8	3.16e-23	13306.4	5.11e-21	13334.3	1.07e-21	16254.3	3.9e-22	1.14319	0.376	NOT	11252.8	7.28e-20	1.1825	0.352	NOT	11471.8	2.28e-21	1.16235	0.156	NOT	0.716099	0.0382	NOT	0.7176	0.0973	NOT	0.692297	0.0468	DIFF	0.70577	0.0249	DIFF
TU1330	2	+	8939900	8942213			AT2G20725.1	TU1329	384.272	6.53e-10	341.859	6.15e-05	242.468	7.38e-06	305.584	3.04e-05	1.2575	0.139	NOT	303.947	3.85e-08	1.12473	0.0461	NOT	303.132	9.68e-07	0.799876	0.0264	NOT	0.889628	0.434	NOT	0.63098	0.00723	DIFF	0.994643	0.212	NOT	0.991976	0.308	NOT
TU1331	2	+	8950220	8951112			AT2G20760.1		584.535	3.38e-18	353.833	1.49e-09	329.958	3.39e-08	387.468	1.82e-06	1.5086	0.364	NOT	529.235	1.82e-12	0.668574	0.171	NOT	354.938	1.27e-07	0.929622	0.213	NOT	0.605324	0.145	NOT	0.564479	0.0635	NOT	1.36588	0.404	NOT	0.916045	0.292	NOT
TU1332	2	-	8986508	8988387			AT2G20860.1		340.557	7.05e-11	434.805	3.24e-09	407.944	1.14e-08	471.741	2.45e-13	0.721915	0.224	NOT	590.011	5.26e-14	0.736944	0.163	NOT	360.446	2.94e-12	1.13178	0.475	NOT	1.27675	0.194	NOT	1.19787	0.321	NOT	1.25071	0.152	NOT	0.764076	0.35	NOT
TU1333	2	-	9001013	9006993			AT2G20920.1		1003.44	8.43e-18	1177.84	1.79e-24	907.422	7.26e-21	1082.84	1.87e-21	0.926674	0.422	NOT	1404.11	5.74e-26	0.838852	0.448	NOT	1093.63	2.89e-16	0.829734	0.132	NOT	1.1738	0.151	NOT	0.904311	0.159	NOT	1.29669	0.175	NOT	1.00996	0.367	NOT
TU1334	2	-	9010210	9012387			AT2G20950.1		798.892	6.63e-16	923.628	4.93e-17	812.523	8.53e-19	646.168	4.62e-16	1.23635	0.0873	NOT	1365.3	8.45e-21	0.676502	0.0738	NOT	912.495	2.36e-14	0.890441	0.45	NOT	1.15614	0.483	NOT	1.01706	0.435	NOT	2.11292	0.00458	DIFF	1.41216	0.101	NOT
TU1335	2	-	9014251	9018103			AT2G20960.1,AT2G20970.1		384.392	3.42e-10	274.129	3.95e-08	329.622	1.02e-10	333.896	1.05e-09	1.15123	0.188	NOT	273.083	5.42e-11	1.00383	0.431	NOT	323.208	5.05e-12	1.01984	0.368	NOT	0.71315	0.0146	DIFF	0.857515	0.0541	NOT	0.817868	0.118	NOT	0.96799	0.379	NOT
TU1336	2	-	9023927	9025112			AT2G20990.1		2667.56	1.71e-14	2026.74	2.83e-11	1252.54	2.79e-10	3268.56	3.54e-17	0.816127	0.37	NOT	1863.06	2.49e-12	1.08786	0.437	NOT	1511	3.61e-15	0.828948	0.122	NOT	0.759773	0.124	NOT	0.469545	0.0337	DIFF	0.569994	0.103	NOT	0.462283	0.138	NOT
TU1337	2	-	9033225	9034305			AT2G21040.1		582.847	5.27e-06	571.228	0.000120445	397.259	0.000173601	609.765	0.000590513	0.955855	0.44	NOT	1723.87	6.94e-24	0.331364	2.14e-05	DIFF	1096.55	2.53e-08	0.362281	0.078	NOT	0.980065	0.309	NOT	0.681584	0.232	NOT	2.82711	0.000213	DIFF	1.79832	0.245	NOT
TU1338	2	+	9062561	9063251			AT2G21130.1		398.728	2.36e-08	852.403	7.09e-10	538.221	6.97e-10	426.113	5.18e-05	0.935733	0.239	NOT	748.036	2.01e-08	1.13952	0.397	NOT	516.775	7.31e-11	1.0415	0.313	NOT	2.13781	0.126	NOT	1.34985	0.456	NOT	1.75549	0.0672	NOT	1.21277	0.358	NOT
TU1339	2	+	9067864	9068750			AT2G21140.1		370.417	2.97e-06	429.53	1.68e-07	459.361	7.81e-09	416.766	0.000332178	0.888789	0.44	NOT	402.559	6.73e-05	1.067	0.351	NOT	294.651	0.00196221	1.559	0.0456	NOT	1.15959	0.496	NOT	1.24012	0.362	NOT	0.965911	0.485	NOT	0.706994	0.148	NOT
TU1340	2	+	9077626	9080421			AT2G21170.1		425.055	3.1e-13	289.363	5.41e-10	341.443	1.31e-11	406	6.45e-16	1.04693	0.206	NOT	289.397	4.02e-09	0.999883	0.456	NOT	310.328	1.45e-09	1.10026	0.27	NOT	0.680766	0.141	NOT	0.803291	0.294	NOT	0.7128	0.0244	DIFF	0.764355	0.0189	DIFF
TU1341	2	+	9081890	9082766			AT2G21180.1		592.645	7.27e-08	854.51	2.03e-06	753.403	1.86e-06	616.872	0.000186328	0.960726	0.191	NOT	1983.96	2.6e-13	0.430709	0.0026	DIFF	783.825	5.81e-08	0.961188	0.466	NOT	1.44186	0.482	NOT	1.27126	0.434	NOT	3.21616	0.000264	DIFF	1.27064	0.12	NOT
TU1342	2	-	9091487	9091887					222.312	7.4e-06	555.191	6.44e-09	284.673	8.81e-10	95.0458	2.02e-06	2.339	0.187	NOT	694.921	1.62e-14	0.798927	0.115	NOT	477.823	1.44e-05	0.595771	0.0947	NOT	2.49735	0.109	NOT	1.28051	0.449	NOT	7.31143	0.000692	DIFF	5.02729	0.0135	DIFF
TU1343	2	+	9108865	9109424			AT2G21240.1		563.477	3.05e-09	625.853	2.07e-10	534.947	0.000240396	461.625	3.16e-09	1.22064	0.227	NOT	429.997	2.25e-07	1.45548	0.215	NOT	312.728	0.00324022	1.71058	0.126	NOT	1.1107	0.413	NOT	0.949368	0.15	NOT	0.931486	0.39	NOT	0.67745	0.0633	DIFF
TU1344	2	-	9119918	9120544			AT2G21290.1		582.718	3.51e-07	702.864	1.01e-09	712.976	1.86e-09	1056.57	5.39e-08	0.551519	0.141	NOT	952.111	1.7e-07	0.738216	0.329	NOT	504.031	5.58e-05	1.41455	0.151	NOT	1.20618	0.0575	NOT	1.22354	0.0204	DIFF	0.901134	0.475	NOT	0.477045	0.433	NOT
TU1345	2	-	9134480	9135065			AT2G21320.1		522.489	3.94e-10	1133.9	9.18e-12	570.608	5.42e-07	893.478	1.28e-09	0.584781	0.175	NOT	639.327	2.2e-05	1.77358	0.0464	NOT	580.75	1.17e-07	0.982536	0.395	NOT	2.17019	0.028	NOT	1.0921	0.476	NOT	0.715549	0.239	NOT	0.649988	0.206	NOT
TU1346	2	+	9135338	9137403			AT2G21330.1		455.398	7.27e-11	449.846	1.05e-07	297.379	2.54e-09	358.58	1.31e-08	1.27	0.301	NOT	416.526	2.48e-09	1.08	0.436	NOT	444.682	4.79e-09	0.668745	0.159	NOT	0.987808	0.374	NOT	0.653009	0.112	NOT	1.1616	0.373	NOT	1.24012	0.411	NOT
TU1347	2	+	9179910	9181373			AT2G21430.1,AT2G21440.1		264.924	1.29e-09	427.108	6.32e-13	359.088	7.86e-10	328.591	7e-10	0.806242	0.172	NOT	326.424	1.1e-08	1.30845	0.359	NOT	483.127	5.12e-12	0.743258	0.11	NOT	1.61219	0.0845	NOT	1.35544	0.195	NOT	0.993405	0.423	NOT	1.4703	0.12	NOT
TU1348	2	-	9223305	9223701			AT2G21520.1		1705.54	2.68e-19	1150.99	1.93e-22	1657.87	6.3e-17	1467.72	3.21e-20	1.16203	0.5	NOT	1457.1	2.33e-16	0.789918	0.469	NOT	1325.29	1.1e-16	1.25095	0.215	NOT	0.674854	0.338	NOT	0.97205	0.389	NOT	0.992764	0.322	NOT	0.902958	0.298	NOT
TU1349	2	-	9223802	9224019			AT2G21520.1		2085.58	7.79e-17	1801.3	5.1e-17	1684.61	7.3e-12	1691.77	8.36e-18	1.23278	0.45	NOT	1734.47	5.86e-14	1.03853	0.34	NOT	1736	5.61e-17	0.970397	0.352	NOT	0.863693	0.306	NOT	0.807742	0.196	NOT	1.02524	0.481	NOT	1.02614	0.263	NOT
TU1350	2	-	9225464	9226065			AT2G21520.1		1927.08	7.7e-24	1663.37	6.56e-19	1420.93	8.37e-15	1723.76	7.08e-19	1.11795	0.206	NOT	1438.77	8.82e-24	1.15611	0.159	NOT	1247.3	1.31e-23	1.1392	0.497	NOT	0.863156	0.118	NOT	0.737349	0.0307	DIFF	0.83467	0.151	NOT	0.723593	0.186	NOT
TU1351	2	+	9237665	9238404			AT2G21560.1		399.395	8.2e-12	569.573	2.75e-11	365.09	3.34e-08	528.907	3.82e-13	0.755133	0.243	NOT	432.422	1.88e-05	1.31717	0.271	NOT	408.781	5.93e-06	0.893119	0.409	NOT	1.42609	0.411	NOT	0.914108	0.295	NOT	0.817577	0.122	NOT	0.772879	0.183	NOT
TU1352	2	+	9272408	9272982			AT2G21660.1		10196	6.03e-20	7356.53	2.77e-18	7539.3	6.29e-18	9788.11	3.88e-17	1.04167	0.5	NOT	6246.13	4.09e-16	1.17777	0.488	NOT	7794.15	2.85e-19	0.967302	0.496	NOT	0.721511	0.378	NOT	0.739437	0.402	NOT	0.638134	0.378	NOT	0.796288	0.347	NOT
TU1353	2	+	9325521	9327077			AT2G21860.1		300.077	1.6e-08	311.273	7.39e-12	294.563	5.22e-06	282.291	2.42e-08	1.06301	0.38	NOT	392.654	1.33e-12	0.792741	0.148	NOT	289.887	1.66e-09	1.01613	0.292	NOT	1.03731	0.258	NOT	0.981625	0.297	NOT	1.39095	0.0305	DIFF	1.02691	0.395	NOT
TU1354	2	+	9364238	9365117			AT2G21970.1		493.395	7.28e-14	554.59	8.07e-12	703.852	2.19e-17	612.25	3.73e-12	0.805872	0.459	NOT	657.988	1.05e-12	0.842857	0.306	NOT	707.142	9.04e-14	0.995347	0.497	NOT	1.12403	0.25	NOT	1.42655	0.23	NOT	1.0747	0.38	NOT	1.15499	0.308	NOT
TU1355	2	-	9394649	9395265			AT2G22080.1		3507.42	6.12e-25	4065.65	1.77e-32	2832.16	1.98e-25	3174.78	1.26e-28	1.10478	0.399	NOT	3706.78	1.41e-30	1.09681	0.278	NOT	3497.24	1.37e-23	0.809827	0.266	NOT	1.15916	0.233	NOT	0.807477	0.429	NOT	1.16757	0.49	NOT	1.10157	0.431	NOT
TU1356	2	+	9399501	9400623			AT2G22100.1		515.427	1.68e-10	643.146	6.26e-10	329.188	1.7e-09	505.399	1.82e-08	1.01984	0.0873	NOT	647.167	1.39e-07	0.993787	0.393	NOT	483.437	1.77e-06	0.680933	0.434	NOT	1.24779	0.306	NOT	0.63867	0.0372	NOT	1.28051	0.169	NOT	0.956545	0.423	NOT
TU1357	2	-	9414701	9421321			AT2G22125.1		250.976	1.22e-05	205.734	3.5e-06	240.336	1.66e-08	278.728	1.22e-10	0.900433	0.211	NOT	222.47	3.85e-06	0.924772	0.404	NOT	198.039	1.51e-06	1.21358	0.267	NOT	0.819736	0.0868	NOT	0.957606	0.148	NOT	0.798162	0.00747	DIFF	0.71051	0.00649	DIFF
TU1358	2	-	9503268	9503853			AT2G22350.1		2298.09	4.91e-11	2898.55	2.72e-14	3447.25	5.1e-10	2276.17	1.09e-10	1.00963	0.394	NOT	4773.34	9.39e-13	0.607237	0.272	NOT	2616.88	4.06e-08	1.31731	0.389	NOT	1.26129	0.307	NOT	1.50005	0.476	NOT	2.09709	0.105	NOT	1.14969	0.476	NOT
TU1359	2	-	9506759	9507689			AT2G22360.1		1068.42	7.13e-12	903.241	1.58e-20	779.408	2.12e-11	930.903	1.6e-15	1.14772	0.395	NOT	825.23	5.08e-14	1.09453	0.129	NOT	888.678	3.55e-12	0.877042	0.379	NOT	0.845399	0.279	NOT	0.729496	0.231	NOT	0.886483	0.215	NOT	0.954641	0.227	NOT
TU1360	2	+	9533247	9535662			AT2G22430.1		624.459	7.51e-10	595.862	1.32e-11	630.366	1.09e-08	783.478	3.79e-13	0.797035	0.47	NOT	452.079	2.36e-08	1.31805	0.0479	NOT	429.058	3.99e-07	1.46919	0.447	NOT	0.954205	0.438	NOT	1.00946	0.211	NOT	0.577016	0.0251	DIFF	0.547632	0.168	NOT
TU1361	2	+	9567213	9567782					396.064	1.13e-08	1770.08	9.19e-25	19192.6	2.02e-43	363.21	3.17e-05	1.09045	0.21	NOT	850.723	8.99e-13	2.08068	0.000757	DIFF	10466.7	1.29e-42	1.83368	0.0124	NOT	4.46918	5.78e-07	DIFF	48.4583	9.87e-12	DIFF	2.34223	0.00619	DIFF	28.8172	7.88e-13	DIFF
TU1362	2	-	9637462	9638268			AT2G22660.1		2382.21	4.92e-20	1046.74	2.85e-08	857.51	8.98e-11	2772.97	1.83e-17	0.859082	0.323	NOT	1140.34	1.13e-07	0.917919	0.32	NOT	487.789	1.17e-11	1.75795	0.31	NOT	0.439399	0.0314	NOT	0.359964	0.0366	NOT	0.411234	0.166	NOT	0.175909	0.0739	NOT
TU1363	2	-	9644290	9645197			AT2G22670.1		482.282	2.47e-06	268.143	0.00107921	258.848	0.000953912	598.141	3.95e-11	0.806302	0.0467	NOT	255.94	0.00168904	1.04768	0.247	NOT	224.861	7.12e-05	1.15115	0.381	NOT	0.555988	0.177	NOT	0.536715	0.136	NOT	0.427892	0.00722	DIFF	0.375933	0.000554	DIFF
TU1364	2	-	9703057	9703971			AT2G22790.1		460.862	1.13e-10	337.829	3.84e-08	499.273	5.63e-09	376.615	1.25e-11	1.2237	0.378	NOT	486.056	5.81e-08	0.695041	0.391	NOT	510.242	6.43e-08	0.978502	0.335	NOT	0.733037	0.139	NOT	1.08335	0.252	NOT	1.29059	0.326	NOT	1.35481	0.48	NOT
TU1365	2	+	9704466	9706658			AT2G22795.1		654.987	1.82e-14	644.476	5.74e-12	494.888	1.02e-12	813.064	2.6e-17	0.805579	0.141	NOT	498.458	3.37e-08	1.29294	0.182	NOT	376.345	2.43e-05	1.31498	0.134	NOT	0.983952	0.255	NOT	0.755569	0.425	NOT	0.613061	0.00456	DIFF	0.462873	0.00993	DIFF
TU1366	2	-	9718849	9721462			AT2G22805.1		454.047	2.19e-09	280.8	2.99e-06	239.334	0.00396097	368.067	1.51e-09	1.2336	0.265	NOT	250.14	0.00077962	1.12257	0.201	NOT	222.246	0.0329645	1.07689	0.356	NOT	0.618438	0.00731	DIFF	0.527113	0.00305	DIFF	0.679605	0.00185	DIFF	0.603819	0.00318	DIFF
TU1367	2	+	9751638	9752141			AT2G22900.1		413.216	8.41e-07	322.839	0.00249755	438.369	3.93e-06	530.871	2.94e-09	0.778374	0.285	NOT	319.492	1.36e-05	1.01048	0.489	NOT	349.866	0.00231289	1.25296	0.252	NOT	0.781284	0.166	NOT	1.06087	0.311	NOT	0.601826	0.0955	NOT	0.659041	0.0553	DIFF
TU1368	2	-	9885072	9888936			AT2G23200.1		424.199	1.43e-17	710.248	5.72e-25	510.562	2.87e-20	305.692	1.22e-13	1.38767	0.0668	NOT	1338.76	9.66e-32	0.530527	0.00445	NOT	866.387	3.58e-23	0.5893	0.00141	DIFF	1.67433	0.000191	DIFF	1.20359	0.149	NOT	4.37944	1.04e-11	DIFF	2.83418	2.43e-08	DIFF
TU1369	2	+	9907169	9907812			AT2G23260.1		591.413	1.02e-08	598.104	1.34e-06	654.783	3.04e-11	411.238	7.18e-09	1.43813	0.4	NOT	561.46	5.79e-10	1.06527	0.293	NOT	674.603	5.56e-06	0.97062	0.372	NOT	1.01131	0.461	NOT	1.10715	0.46	NOT	1.36529	0.191	NOT	1.64042	0.489	NOT
TU1370	2	+	9911388	9913726			AT2G23290.1		534.654	6.94e-18	536.859	4.66e-13	433.662	1.65e-07	481.496	2.49e-09	1.1104	0.26	NOT	603.285	1.37e-10	0.889893	0.383	NOT	510.628	2.66e-07	0.849272	0.272	NOT	1.00412	0.49	NOT	0.811108	0.0402	NOT	1.25294	0.413	NOT	1.0605	0.344	NOT
TU1371	2	-	9929825	9930600				TU1372	415.348	2.45e-05	665.149	2.98e-10	466.089	6.46e-08	461.5	2.48e-09	0.899996	0.376	NOT	384.418	0.000230028	1.73028	0.17	NOT	401.309	0.000803998	1.16142	0.253	NOT	1.60143	0.368	NOT	1.12217	0.19	NOT	0.832975	0.179	NOT	0.869575	0.322	NOT
TU1372	2	+	9930102	9930595				TU1371	618.69	0.000149754	524.913	0.000112455	486.58	0.00148417	805.796	5.09e-07	0.7678	0.464	NOT	763.769	2.75e-12	0.687267	0.0723	NOT	612.911	7.78e-07	0.793884	0.0483	NOT	0.848427	0.228	NOT	0.786468	0.0983	NOT	0.947844	0.266	NOT	0.760628	0.407	NOT
TU1373	2	-	9943030	9945905			AT2G23340.1		762.109	5.89e-10	1301.49	6e-18	1094.49	3e-13	681.531	4.39e-10	1.11823	0.399	NOT	1911.37	1.37e-25	0.68092	0.0942	NOT	994.803	3.33e-17	1.10021	0.318	NOT	1.70775	0.0295	NOT	1.43613	0.413	NOT	2.80452	0.000545	DIFF	1.45966	0.134	NOT
TU1374	2	-	9951158	9953213			AT2G23350.1		1055.33	3.62e-09	661.44	1.98e-11	655.278	1.26e-08	562.827	7.73e-06	1.87505	0.0181	NOT	542.146	9.02e-09	1.22004	0.248	NOT	497.268	1.76e-07	1.31776	0.147	NOT	0.626761	0.111	NOT	0.620922	0.0187	DIFF	0.963255	0.305	NOT	0.883518	0.128	NOT
TU1375	2	-	10008712	10009889			AT2G23480.1		1281.36	8.72e-10	1284.74	1.48e-13	1523.45	1.99e-11	1571.13	4.01e-13	0.815566	0.258	NOT	1646.65	4.08e-12	0.780214	0.354	NOT	830.688	1.48e-07	1.83396	0.307	NOT	1.00264	0.361	NOT	1.18893	0.483	NOT	1.04807	0.348	NOT	0.52872	0.174	NOT
TU1376	2	-	10024037	10024252					1394.66	4.19e-12	1068.39	5.72e-07	1311.56	2.7e-11	1266.43	3.81e-08	1.10125	0.442	NOT	867.311	1.48e-06	1.23184	0.281	NOT	1134.26	5.08e-08	1.15631	0.467	NOT	0.766058	0.209	NOT	0.940416	0.302	NOT	0.684847	0.122	NOT	0.895636	0.215	NOT
TU1377	2	+	10033420	10037381			AT2G23550.1,AT2G23560.1		368.38	2.44e-10	283.186	2.92e-12	273.688	1.83e-14	177.111	6.52e-13	2.07994	0.00582	NOT	284.823	7.41e-12	0.994253	0.3	NOT	178.967	3.76e-11	1.52927	0.0711	NOT	0.768733	0.199	NOT	0.74295	0.0764	NOT	1.60816	0.132	NOT	1.01048	0.34	NOT
TU1378	2	-	10079126	10079866			AT2G23690.1		369.953	0.0045069	490.306	2.73e-11	353.861	0.00011546	439.63	0.000645171	0.84151	0.292	NOT	420.476	0.00113389	1.16607	0.114	NOT	330.045	0.0046089	1.07216	0.486	NOT	1.32532	0.181	NOT	0.956503	0.487	NOT	0.956432	0.206	NOT	0.750734	0.292	NOT
TU1379	2	-	10129753	10130125					879.053	4.89e-10	888.547	8.32e-11	452.022	3.38e-06	368.302	1.32e-07	2.38677	0.00978	NOT	863.193	1.64e-10	1.02937	0.435	NOT	492.706	1.14e-05	0.917427	0.495	NOT	1.0108	0.367	NOT	0.514215	0.0666	NOT	2.34371	0.0795	NOT	1.33778	0.146	NOT
TU1380	2	+	10142789	10143195			AT2G23810.1		860.984	3.89e-05	1219.46	1.94e-08	832.711	1.57e-08	1310.63	4.8e-09	0.656924	0.112	NOT	1033.63	1.47e-08	1.17978	0.394	NOT	639.958	2.76e-07	1.3012	0.221	NOT	1.41636	0.12	NOT	0.967162	0.474	NOT	0.788651	0.326	NOT	0.488283	0.037	DIFF
TU1381	2	+	10232700	10235560			AT2G24050.1		319.805	3.22e-09	290.398	1.35e-07	321.696	2.98e-10	302.092	5.33e-08	1.05863	0.346	NOT	363.883	6.77e-09	0.798053	0.315	NOT	264.108	2.15e-06	1.21805	0.236	NOT	0.908047	0.339	NOT	1.00591	0.436	NOT	1.20454	0.327	NOT	0.874263	0.307	NOT
TU1382	2	-	10237873	10238588			AT2G24060.1		896.589	1.73e-07	753.163	2.53e-06	859.707	1.33e-06	956.63	9.09e-08	0.937237	0.234	NOT	890.532	1e-11	0.845745	0.0854	NOT	664.241	2.6e-15	1.29427	0.481	NOT	0.840031	0.363	NOT	0.958864	0.426	NOT	0.930905	0.333	NOT	0.694355	0.291	NOT
TU1383	2	-	10254896	10255895					2887.02	3.21e-19	3609.64	6.48e-19	3159.12	1.82e-19	5291.62	5.07e-25	0.545583	0.17	NOT	4905.29	1.6e-24	0.735867	0.141	NOT	4887.62	5.21e-22	0.646351	0.121	NOT	1.2503	0.485	NOT	1.09425	0.331	NOT	0.926992	0.483	NOT	0.923653	0.395	NOT
TU1384	2	-	10274816	10275886					1837.85	5.22e-09	888.917	5.35e-09	772.462	2.18e-10	1393.82	1.87e-10	1.31857	0.313	NOT	1627.5	3.61e-18	0.546186	0.115	NOT	1130.63	3.93e-07	0.683214	0.432	NOT	0.483672	0.158	NOT	0.420307	0.111	NOT	1.16765	0.303	NOT	0.811174	0.161	NOT
TU1385	2	+	10294043	10294873			AT2G24200.1		1346.8	9.79e-13	1254.36	2.96e-09	884.13	8.98e-09	1653.71	6.66e-10	0.814411	0.454	NOT	1038.61	9.63e-13	1.20773	0.422	NOT	633.014	8.87e-06	1.3967	0.319	NOT	0.931363	0.37	NOT	0.656467	0.103	NOT	0.628048	0.258	NOT	0.382784	0.0629	DIFF
TU1386	2	+	10334312	10337059			AT2G24270.1		354.139	2.16e-07	478.143	4.35e-11	268.85	7.38e-06	403.202	2.36e-09	0.878317	0.0979	NOT	326.756	1.2e-06	1.4633	0.0583	NOT	238.317	5.39e-06	1.12812	0.413	NOT	1.35016	0.0759	NOT	0.759165	0.208	NOT	0.810403	0.0876	NOT	0.591061	0.00529	DIFF
TU1387	2	+	10371754	10373067			AT2G24360.1		742.179	9.64e-10	728.257	1.95e-10	481.904	1.5e-09	812.717	1.51e-12	0.913207	0.14	NOT	763.388	8.54e-12	0.95398	0.367	NOT	544.299	1.51e-07	0.885366	0.355	NOT	0.981242	0.47	NOT	0.64931	0.143	NOT	0.939304	0.234	NOT	0.669728	0.00397	DIFF
TU1388	2	+	10390573	10391108			AT2G24430.1		255.502	1.52e-06	246.993	1.27e-05	381.708	6.75e-12	245.516	9.66e-06	1.04067	0.208	NOT	256.163	3.58e-05	0.964202	0.341	NOT	231.389	1.04e-05	1.64964	0.208	NOT	0.966697	0.315	NOT	1.49395	0.291	NOT	1.04337	0.291	NOT	0.94246	0.339	NOT
TU1389	2	+	10451964	10453321			AT2G24580.1		524.02	4.86e-08	474.628	9.61e-10	431.488	1.09e-07	517.255	5.91e-11	1.01308	0.307	NOT	453.733	8.59e-07	1.04605	0.335	NOT	415.515	5.64e-09	1.03844	0.484	NOT	0.905744	0.373	NOT	0.823419	0.173	NOT	0.877194	0.317	NOT	0.803308	0.0662	DIFF
TU1390	2	-	10505525	10506370			AT2G24683.1		392.529	3.77e-09	546.997	1.06e-13	605.919	5.68e-12	367.194	3.34e-09	1.069	0.329	NOT	326.627	1.84e-10	1.67468	0.00969	NOT	508.054	2.01e-09	1.19263	0.211	NOT	1.39352	0.101	NOT	1.54363	0.0414	NOT	0.889522	0.159	NOT	1.38361	0.0469	DIFF
TU1391	2	-	10566531	10567242			AT2G24762.1		1160.05	9.92e-12	1188.7	2.69e-11	1210.6	5.98e-13	1332.31	7.32e-13	0.870706	0.302	NOT	560.986	1.03e-06	2.11895	0.0424	NOT	800.577	8.7e-12	1.51216	0.364	NOT	1.0247	0.401	NOT	1.04358	0.46	NOT	0.421063	0.0193	DIFF	0.600894	0.169	NOT
TU1392	2	-	10573499	10576559			AT2G24790.1		467.372	3.91e-12	534.255	1.56e-13	391.998	5.19e-11	397.433	1.07e-09	1.17598	0.453	NOT	693.628	4.31e-13	0.770233	0.212	NOT	485.681	3.82e-09	0.80711	0.318	NOT	1.1431	0.249	NOT	0.838728	0.461	NOT	1.74527	0.0579	NOT	1.22204	0.282	NOT
TU1393	2	+	10593730	10594511			AT2G24860.1		291.217	0.000141412	319.275	0.000156927	304.784	1.88e-05	307.548	0.00243158	0.946899	0.476	NOT	343.196	5.65e-06	0.930299	0.444	NOT	402.799	2.98e-14	0.756665	0.115	NOT	1.09635	0.301	NOT	1.04659	0.47	NOT	1.11591	0.378	NOT	1.30971	0.0743	NOT
TU1394	2	-	10615572	10617001			AT2G24940.1,AT2G24945.1		2045.1	2.08e-09	2198.58	3.11e-17	1856.54	2.38e-10	2902.95	3.66e-11	0.70449	0.235	NOT	3275.22	2.81e-13	0.671277	0.388	NOT	2712.81	4.46e-16	0.68436	0.0752	NOT	1.07505	0.117	NOT	0.907799	0.344	NOT	1.12824	0.464	NOT	0.934501	0.484	NOT
TU1395	2	+	10660843	10661923			AT2G25050.1		937.979	6.41e-06	625.769	7.01e-07	355.615	0.00175173	784.809	2.51e-09	1.19517	0.457	NOT	282.78	0.000351462	2.21292	0.0909	NOT	389.562	0.000355542	0.912859	0.262	NOT	0.667146	0.181	NOT	0.379129	0.0216	DIFF	0.360317	0.00415	DIFF	0.496378	0.0243	DIFF
TU1396	2	+	10679171	10679780			AT2G25090.1		286.345	0.000222176	263.564	0.000776601	346.34	8.94e-05	225.227	0.00948834	1.27136	0.381	NOT	453.281	7.57e-14	0.581458	0.0174	NOT	245.093	0.063689	1.4131	0.391	NOT	0.920442	0.391	NOT	1.20952	0.35	NOT	2.01255	0.0102	DIFF	1.0882	0.278	NOT
TU1397	2	-	10682373	10683139					8915.91	2.51e-31	10827.2	3.25e-46	9627.41	1.03e-33	6080.49	2.07e-25	1.46631	0.0659	NOT	4120.32	6.19e-32	2.62776	0.000339	DIFF	8269.58	2.99e-37	1.1642	0.271	NOT	1.21437	0.0566	NOT	1.0798	0.211	NOT	0.67763	0.318	NOT	1.36002	0.0389	DIFF
TU1398	2	+	10683320	10683852			AT2G25095.1		355.127	0.00013461	340.783	3.43e-07	393.054	2.86e-07	246.972	0.000637942	1.43792	0.482	NOT	317.403	3.81e-05	1.07366	0.424	NOT	481.882	1.53e-11	0.815664	0.129	NOT	0.959609	0.449	NOT	1.1068	0.4	NOT	1.28518	0.416	NOT	1.95116	0.0426	DIFF
TU1399	2	+	10705016	10706709			AT2G25140.1		262.158	0.00442695	352.973	5.74e-07	319.462	4.3e-07	259.106	6.82e-05	1.01178	0.394	NOT	603.031	3.53e-12	0.585331	0.0348	NOT	298.455	2.49e-05	1.07039	0.328	NOT	1.34641	0.0314	NOT	1.21859	0.23	NOT	2.32735	3.5e-05	DIFF	1.15186	0.068	NOT
TU1400	2	-	10760716	10761801			AT2G25250.1		539.273	5.72e-12	382.556	9.02e-07	423.952	1.55e-08	400.072	3.88e-09	1.34794	0.265	NOT	467.807	1.02e-06	0.817765	0.4	NOT	390.048	1.34e-09	1.08692	0.431	NOT	0.709392	0.218	NOT	0.786155	0.199	NOT	1.16931	0.491	NOT	0.974945	0.491	NOT
TU1401	2	+	10854486	10857000			AT2G25490.1		765.659	1.86e-22	768.161	4.22e-30	700.9	1.1e-24	524.71	2.69e-12	1.4592	0.038	NOT	760.915	7.71e-18	1.00952	0.308	NOT	709.519	2.44e-23	0.987852	0.484	NOT	1.00327	0.465	NOT	0.915421	0.398	NOT	1.45016	0.0626	NOT	1.35221	0.0439	DIFF
TU1402	2	-	10913617	10914253			AT2G25625.1		792.893	9.27e-13	687.305	9.1e-10	799.806	3.74e-07	599.483	3.49e-10	1.32263	0.172	NOT	1239.9	4.21e-20	0.554323	0.0301	NOT	890.307	8.64e-11	0.898349	0.473	NOT	0.866832	0.152	NOT	1.00872	0.496	NOT	2.06828	0.0228	DIFF	1.48512	0.231	NOT
TU1403	2	-	10922485	10922892			AT2G25650.1		3415.49	1.19e-11	2108.44	3.87e-09	2612.31	2.2e-10	2314.01	1.66e-15	1.476	0.128	NOT	2813.86	3.12e-08	0.749305	0.323	NOT	3017.69	1.92e-07	0.865665	0.496	NOT	0.617317	0.117	NOT	0.764842	0.113	NOT	1.21601	0.49	NOT	1.3041	0.356	NOT
TU1404	2	+	10993087	10994210			AT2G25760.1		232.131	6.11e-05	563.336	4.94e-10	388.526	0.00364591	332.92	1.54e-07	0.697258	0.179	NOT	401.868	1.09e-08	1.40179	0.118	NOT	351.213	0.000445833	1.10624	0.4	NOT	2.4268	0.0159	DIFF	1.67374	0.181	NOT	1.2071	0.375	NOT	1.05495	0.348	NOT
TU1405	2	+	11013136	11014153			AT2G25800.1		439.513	1.18e-07	386.319	2.1e-06	293.96	0.000389869	471.719	2.65e-11	0.931726	0.178	NOT	434.856	3.13e-07	0.888384	0.262	NOT	278.416	0.000144608	1.05583	0.231	NOT	0.878971	0.32	NOT	0.668831	0.0978	NOT	0.921854	0.219	NOT	0.590216	0.038	DIFF
TU1406	2	-	11048838	11050067			AT2G25900.1		377.232	2.84e-10	333.241	1.41e-05	280.873	0.00300682	540.225	2.84e-10	0.698287	0.141	NOT	279.31	0.000582903	1.19309	0.157	NOT	339.785	3.54e-06	0.82662	0.324	NOT	0.883385	0.153	NOT	0.744563	0.0775	NOT	0.517025	0.00191	DIFF	0.628969	0.0315	DIFF
TU1407	2	-	11067157	11067798			AT2G25930.1		359.9	1.88e-05	475.627	5.34e-11	454.917	1.68e-07	483.07	4.67e-07	0.745027	0.187	NOT	340.731	1.71e-08	1.3959	0.0181	NOT	310.917	0.000694554	1.46315	0.0606	NOT	1.32155	0.0666	NOT	1.26401	0.15	NOT	0.705345	0.0678	NOT	0.643627	0.0639	DIFF
TU1408	2	-	11069234	11070279			AT2G25930.1		871.948	1.62e-18	754.459	9.56e-15	879.129	7.59e-16	949.685	1.22e-21	0.918144	0.0581	NOT	843.148	1.05e-10	0.894812	0.464	NOT	899.355	3.55e-12	0.977511	0.403	NOT	0.865257	0.437	NOT	1.00824	0.458	NOT	0.887819	0.0698	NOT	0.947003	0.0578	DIFF
TU1409	2	-	11078373	11078558					6001.58	1.22e-31	1721.43	6.77e-20	1855.13	9.99e-21	11451	3.23e-33	0.52411	0.0599	NOT	1830.78	1.08e-22	0.940271	0.288	NOT	2378.43	8.43e-25	0.779981	0.221	NOT	0.286829	0.00131	DIFF	0.309107	0.00247	DIFF	0.159879	0.000754	DIFF	0.207705	0.00373	DIFF
TU1410	2	+	11078859	11079856			AT2G25970.1		360.995	5.44e-06	306.551	2.39e-06	392.72	3.34e-07	425.53	2.94e-07	0.848342	0.31	NOT	413.118	2e-11	0.742042	0.122	NOT	477.015	7.04e-08	0.823286	0.236	NOT	0.849184	0.292	NOT	1.08788	0.478	NOT	0.970832	0.479	NOT	1.12099	0.485	NOT
TU1411	2	+	11116264	11120929			AT2G26080.1		2152.96	3.5e-22	1742.6	1.09e-25	1262.51	3.23e-11	1896.17	5.14e-26	1.13543	0.386	NOT	1437.13	7.79e-19	1.21256	0.231	NOT	1584.68	3.31e-15	0.796697	0.125	NOT	0.809397	0.408	NOT	0.586407	0.0308	DIFF	0.757912	0.232	NOT	0.835727	0.175	NOT
TU1412	2	-	11127594	11128809			AT2G26110.1		1320.93	4.23e-14	1766.22	1.1e-19	1435.02	5.92e-20	1320.48	2.13e-14	1.00034	0.441	NOT	1155.69	2.81e-16	1.52828	0.0192	NOT	1338.44	4.18e-15	1.07216	0.441	NOT	1.3371	0.0582	NOT	1.08637	0.455	NOT	0.875204	0.367	NOT	1.0136	0.466	NOT
TU1413	2	+	11138684	11139809			AT2G26140.1		1072.89	6.09e-13	774.606	1.14e-15	608.948	8.03e-09	989.202	8.9e-18	1.0846	0.207	NOT	737.636	1.06e-17	1.05012	0.137	NOT	658.641	4.89e-10	0.924552	0.172	NOT	0.721981	0.101	NOT	0.567577	0.0643	NOT	0.745688	0.204	NOT	0.665831	0.067	DIFF
TU1414	2	-	11142936	11144238			AT2G26150.1		309.047	0.217854	698.632	3.28e-07	501.34	1.14e-08	270.528	0.0772637	1.14238	0.373	NOT	2207.17	4.37e-20	0.316528	1.1e-05	DIFF	418.656	8.21e-07	1.1975	0.194	NOT	2.2606	0.00978	DIFF	1.62221	0.0932	NOT	8.15875	1.1e-09	DIFF	1.54755	0.257	NOT
TU1415	2	+	11167414	11169319					4738.6	1.04e-09	3524.55	1.39e-09	3833.14	1.26e-09	3503.34	9.77e-10	1.35259	0.32	NOT	3657.81	1.07e-09	0.963568	0.24	NOT	4202.34	1.5e-09	0.912144	0.481	NOT	0.743796	0.332	NOT	0.808918	0.466	NOT	1.04409	0.222	NOT	1.19952	0.312	NOT
TU1416	2	+	11195012	11195522			AT2G26280.1		904.572	5.62e-10	819.742	4.65e-09	843.474	2.81e-10	1357.65	3.6e-12	0.666278	0.22	NOT	966.167	3.69e-10	0.848448	0.452	NOT	806.553	5.47e-07	1.04578	0.351	NOT	0.906221	0.233	NOT	0.932456	0.083	NOT	0.711647	0.0675	NOT	0.59408	0.0292	DIFF
TU1417	2	-	11207582	11208084			AT2G26300.1		1865.4	2.38e-06	1218.46	9.48e-06	758.874	1.83e-07	1312.6	3.68e-06	1.42115	0.334	NOT	1212.59	1.49e-11	1.00484	0.486	NOT	1089.56	9.65e-11	0.696496	0.227	NOT	0.65319	0.313	NOT	0.406816	0.466	NOT	0.923808	0.49	NOT	0.830078	0.452	NOT
TU1418	2	-	11221057	11221368					1064.37	1.34e-11	892.293	6.21e-06	1201.29	1.01e-07	595.682	4.07e-05	1.78681	0.0509	NOT	307.027	0.00074012	2.90624	0.035	NOT	718.523	1.71e-08	1.67189	0.362	NOT	0.83833	0.303	NOT	1.12864	0.274	NOT	0.515421	0.194	NOT	1.20622	0.266	NOT
TU1419	2	+	11248172	11249177			AT2G26420.1		631.928	7.1e-08	663.59	2.21e-07	676.373	2.06e-07	891.842	1.44e-07	0.708565	0.21	NOT	874.541	8.82e-13	0.758787	0.077	NOT	638.627	5.46e-11	1.0591	0.436	NOT	1.0501	0.483	NOT	1.07033	0.314	NOT	0.980601	0.253	NOT	0.716076	0.288	NOT
TU1420	2	+	11250313	11251850			AT2G26430.1		2645.91	2.37e-12	1689.73	5.49e-07	1108.9	3.05e-09	2731.98	1.72e-11	0.968495	0.376	NOT	2262.25	7.31e-11	0.746925	0.385	NOT	1942.49	1.49e-11	0.570865	0.374	NOT	0.63862	0.123	NOT	0.4191	0.16	NOT	0.828062	0.152	NOT	0.711019	0.144	NOT
TU1421	2	-	11254487	11255451			AT2G26440.1		255.888	1.08e-05	284.002	5.74e-05	261.467	0.0133312	399.658	5.36e-11	0.640267	0.219	NOT	281.652	0.000649572	1.00834	0.453	NOT	235.083	0.00421372	1.11223	0.283	NOT	1.10987	0.454	NOT	1.0218	0.433	NOT	0.704733	0.303	NOT	0.58821	0.105	NOT
TU1422	2	+	11266454	11266838			AT2G26470.1		678.823	6.37e-06	518.22	4.12e-07	618.252	1.72e-06	979.943	1.7e-09	0.692717	0.126	NOT	808.866	2.82e-09	0.640675	0.121	NOT	511.473	2.15e-06	1.20877	0.332	NOT	0.76341	0.451	NOT	0.910771	0.329	NOT	0.825421	0.426	NOT	0.521942	0.106	NOT
TU1423	2	-	11275689	11279336			AT2G26500.1		2494.07	1.75e-20	2560.12	6.28e-33	1997.86	2.55e-19	2898.19	2.69e-22	0.860561	0.254	NOT	2817.8	7.3e-25	0.908553	0.437	NOT	2300.82	5.77e-25	0.868325	0.223	NOT	1.02648	0.254	NOT	0.801044	0.293	NOT	0.972262	0.399	NOT	0.793882	0.306	NOT
TU1424	2	-	11307039	11309110			AT2G26570.1		791.971	5.63e-14	590.455	1.73e-15	626.874	9.16e-21	601.37	5.07e-10	1.31694	0.133	NOT	721.03	1.08e-16	0.818905	0.261	NOT	527.178	2.53e-14	1.18911	0.341	NOT	0.745551	0.283	NOT	0.791537	0.428	NOT	1.19898	0.0853	NOT	0.876628	0.209	NOT
TU1425	2	-	11337948	11338716			AT2G26640.1		424.615	2.49e-05	622.356	1.08e-08	312.006	6.36e-05	506.033	1.87e-12	0.839105	0.0834	NOT	407.567	0.000286934	1.527	0.166	NOT	311.99	0.00531402	1.00005	0.487	NOT	1.46569	0.199	NOT	0.734797	0.209	NOT	0.805416	0.0593	NOT	0.616541	0.0115	DIFF
TU1426	2	-	11347412	11347779			AT2G26660.1		448.386	2.68e-11	453.067	0.000152261	269.271	0.0513727	456.116	7.2e-05	0.983053	0.45	NOT	496.707	0.0075677	0.912141	0.289	NOT	243.226	0.0667802	1.10708	0.2	NOT	1.01044	0.281	NOT	0.600534	0.184	NOT	1.08899	0.429	NOT	0.533255	0.0326	DIFF
TU1427	2	+	11354410	11356584			AT2G26690.1		618.975	9.35e-12	1614.71	9.49e-13	597.688	2.1e-06	971.802	6.85e-13	0.636935	0.119	NOT	1263.05	2.06e-16	1.27842	0.197	NOT	495.849	7.19e-07	1.20538	0.487	NOT	2.60868	0.0382	NOT	0.965609	0.0399	NOT	1.2997	0.381	NOT	0.510237	0.00128	DIFF
[truncated: 2,812 more rows]
